# Supplementary material for: Cohort profile: the Utrecht Cardiovascular Cohort–Second Manifestations of Arterial Disease (UCC-SMART) Study–an ongoing prospective cohort study of patients at high cardiovascular risk in the Netherlands
Source: PubMed Central journal article supplement — BMJ Open. 2023 Feb 20;13(2):e066952. doi: 10.1136/bmjopen-2022-066952 (PMC9944278; doi:10.1136/bmjopen-2022-066952), 2023-02-20
Supplement: bmjopen-2022-066952.draft_revisions.pdf [file bmjopen-2022-066952.draft_revisions.pdf]

# BMJ Open

BMJ Open is committed to open peer review. As part of this commitment we make the peer review history of every article we publish publicly available.

When an article is published we post the peer reviewers' comments and the authors' responses online. We also post the versions of the paper that were used during peer review. These are the versions that the peer review comments apply to.

The versions of the paper that follow are the versions that were submitted during the peer review process. They are not the versions of record or the final published versions. They should not be cited or distributed as the published version of this manuscript.

BMJ Open is an open access journal and the full, final, typeset and author-corrected version of record of the manuscript is available on our site with no access controls, subscription charges or pay-per-view fees (<http://bmjopen.bmj.com>).

If you have any questions on BMJ Open's open peer review process please email [info.bmjopen@bmj.com](mailto:info.bmjopen@bmj.com)

# BMJ Open

## Cohort profile: the Utrecht Cardiovascular Cohort – Second Manifestations of Arterial Disease (UCC-SMART) study – an ongoing prospective cohort study of patients at high cardiovascular risk in The Netherlands

|                               |                                                                                                                                                                                                                                                                                                                                                                                                                                                                                                                                                                                                                                                                                                                                                                                                                                                                                                                                                                                                                                                                                                                                                                                                                                                                                                                                                                                                                                                                                                                                                                                                                                                                                                                                                                                                                                                                              |
|-------------------------------|------------------------------------------------------------------------------------------------------------------------------------------------------------------------------------------------------------------------------------------------------------------------------------------------------------------------------------------------------------------------------------------------------------------------------------------------------------------------------------------------------------------------------------------------------------------------------------------------------------------------------------------------------------------------------------------------------------------------------------------------------------------------------------------------------------------------------------------------------------------------------------------------------------------------------------------------------------------------------------------------------------------------------------------------------------------------------------------------------------------------------------------------------------------------------------------------------------------------------------------------------------------------------------------------------------------------------------------------------------------------------------------------------------------------------------------------------------------------------------------------------------------------------------------------------------------------------------------------------------------------------------------------------------------------------------------------------------------------------------------------------------------------------------------------------------------------------------------------------------------------------|
| Journal:                      | <i>BMJ Open</i>                                                                                                                                                                                                                                                                                                                                                                                                                                                                                                                                                                                                                                                                                                                                                                                                                                                                                                                                                                                                                                                                                                                                                                                                                                                                                                                                                                                                                                                                                                                                                                                                                                                                                                                                                                                                                                                              |
| Manuscript ID                 | bmjopen-2022-066952                                                                                                                                                                                                                                                                                                                                                                                                                                                                                                                                                                                                                                                                                                                                                                                                                                                                                                                                                                                                                                                                                                                                                                                                                                                                                                                                                                                                                                                                                                                                                                                                                                                                                                                                                                                                                                                          |
| Article Type:                 | Cohort profile                                                                                                                                                                                                                                                                                                                                                                                                                                                                                                                                                                                                                                                                                                                                                                                                                                                                                                                                                                                                                                                                                                                                                                                                                                                                                                                                                                                                                                                                                                                                                                                                                                                                                                                                                                                                                                                               |
| Date Submitted by the Author: | 27-Jul-2022                                                                                                                                                                                                                                                                                                                                                                                                                                                                                                                                                                                                                                                                                                                                                                                                                                                                                                                                                                                                                                                                                                                                                                                                                                                                                                                                                                                                                                                                                                                                                                                                                                                                                                                                                                                                                                                                  |
| Complete List of Authors:     | <p>Castelijns, Maria; University Medical Centre Utrecht, Department of Vascular Medicine</p> <p>Helmink, Marga; University Medical Centre Utrecht, Department of Vascular Medicine</p> <p>Hageman, Steven; University Medical Centre Utrecht, Department of Vascular Medicine</p> <p>Asselbergs, Folkert; University Medical Centre Utrecht, Department of Cardiology</p> <p>de Borst, Gert-Jan; University Medical Centre Utrecht, Department of Vascular Surgery</p> <p>Bots, Michiel; University Medical Centre Utrecht, Julius Centre for Health Sciences and Primary Care</p> <p>cramer, maarten jan; University Hospital Utrecht, Department of Cardiology</p> <p>Dorresteijn, Jannick; University Medical Centre Utrecht, Department of Vascular Medicine</p> <p>Emmelot-Vonk, Marielle; University Medical Centre Utrecht, Department of Geriatrics</p> <p>Geerlings, Mirjam I; University Medical Center Utrecht, Julius Center for Health Sciences and Primary Care</p> <p>de Jong, P. A.; University Medical Centre Utrecht, Department of Radiology</p> <p>van der Kaaij, Niels; University Medical Centre Utrecht, Department of Cardiothoracic Surgery</p> <p>Kappelle, Jaap; University Medical Center Utrecht, Department of Neurology</p> <p>Lely, Titia; Universitair Medisch Centrum Utrecht, Department of Gynaecology and Obstetrics</p> <p>van der Meer, Manon; University Medical Centre Utrecht, Department of Cardiology</p> <p>Mol, Barend; University Medical Centre Utrecht, Department of Vascular Surgery</p> <p>Nathoe, Hendrik; University Medical Center Utrecht, Department of Cardiology</p> <p>Onland-Moret, N. Charlotte; University Medical Centre Utrecht, Julius Centre for Health Sciences and Primary Care</p> <p>van Petersen, Rutger ; University Medical Centre Utrecht, Julius Centre for Health Sciences and Primary Care</p> |

1  
2  
3  
4  
5  
6  
7  
8  
9  
10  
11  
12  
13  
14  
15  
16  
17  
18  
19  
20  
21  
22  
23  
24  
25  
26  
27  
28  
29  
30  
31  
32  
33  
34  
35  
36  
37  
38  
39  
40  
41  
42  
43  
44  
45  
46  
47  
48  
49  
50  
51  
52  
53  
54  
55  
56  
57  
58  
59  
60

|           |                                                                                                                                                                                                                                                                                                                                                                                                                                                       |
|-----------|-------------------------------------------------------------------------------------------------------------------------------------------------------------------------------------------------------------------------------------------------------------------------------------------------------------------------------------------------------------------------------------------------------------------------------------------------------|
|           | Ruigrok, Ynte; University Medical Centre Utrecht, Department of Neurology<br>Vandersteen, Angela; University Medical Centre Utrecht, Department of Vascular Medicine<br>Verhaar , Marianne; University Medical Center Utrecht, Department of Nephrology and Hypertension<br>Westerink, Jan; University Medical Centre Utrecht, Department of Vascular Medicine<br>Visseren, Frank; University Medical Centre Utrecht, Department of Vascular Medicine |
| Keywords: | Vascular medicine < INTERNAL MEDICINE, EPIDEMIOLOGY, PREVENTIVE MEDICINE, General diabetes < DIABETES & ENDOCRINOLOGY                                                                                                                                                                                                                                                                                                                                 |
|           |                                                                                                                                                                                                                                                                                                                                                                                                                                                       |

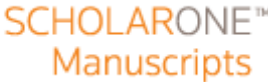

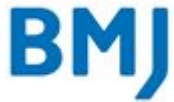

I, the Submitting Author has the right to grant and does grant on behalf of all authors of the Work (as defined in the below author licence), an exclusive licence and/or a non-exclusive licence for contributions from authors who are: i) UK Crown employees; ii) where BMJ has agreed a CC-BY licence shall apply, and/or iii) in accordance with the terms applicable for US Federal Government officers or employees acting as part of their official duties; on a worldwide, perpetual, irrevocable, royalty-free basis to BMJ Publishing Group Ltd ("BMJ") its licensees and where the relevant Journal is co-owned by BMJ to the co-owners of the Journal, to publish the Work in this journal and any other BMJ products and to exploit all rights, as set out in our [licence](#).

The Submitting Author accepts and understands that any supply made under these terms is made by BMJ to the Submitting Author unless you are acting as an employee on behalf of your employer or a postgraduate student of an affiliated institution which is paying any applicable article publishing charge ("APC") for Open Access articles. Where the Submitting Author wishes to make the Work available on an Open Access basis (and intends to pay the relevant APC), the terms of reuse of such Open Access shall be governed by a Creative Commons licence – details of these licences and which [Creative Commons](#) licence will apply to this Work are set out in our licence referred to above.

Other than as permitted in any relevant BMJ Author's Self Archiving Policies, I confirm this Work has not been accepted for publication elsewhere, is not being considered for publication elsewhere and does not duplicate material already published. I confirm all authors consent to publication of this Work and authorise the granting of this licence.

1  
2  
3 1 **Cohort profile: the Utrecht Cardiovascular Cohort – Second Manifestations of Arterial Disease**  
4  
5 2 **(UCC-SMART) study – an ongoing prospective cohort study of patients at high cardiovascular**  
6  
7 3 **risk in The Netherlands**  
8  
9 4

10  
11 5 Maria C. Castelijns<sup>\*a</sup>, Marga A.G. Helmink<sup>\*a</sup>, Steven H.J. Hageman<sup>a</sup>, Folkert W. Asselbergs<sup>b</sup>, Gert J.  
12  
13 6 de Borst<sup>c</sup>, Michiel L. Bots<sup>d</sup>, Maarten-Jan M. Cramer<sup>b</sup>, Jannick A.N. Dorresteijn<sup>a</sup>, Marielle H.  
14  
15 7 Emmelot-Vonk<sup>e</sup>, Mirjam I. Geerlings<sup>d</sup>, Pim A. de Jong<sup>f</sup>, Niels van der Kaaij<sup>g</sup>, L. Jaap Kappelle<sup>h</sup>, A.  
16  
17 8 Titia Lely<sup>i</sup>, Manon G. van der Meer<sup>b</sup>, Barend M. Mol<sup>c</sup>, Hendrik M. Nathoe<sup>b</sup>, N. Charlotte Onland-  
18  
19 9 Moret<sup>d</sup>, Rutger B. van Petersen<sup>d</sup>, Ynte M. Ruigrok<sup>h</sup>, Angela Vandersteen<sup>a</sup>, Marianne C. Verhaar<sup>j</sup>, Jan  
20  
21 10 Westerink<sup>a</sup>, Frank L.J. Visseren<sup>a</sup>  
22  
23  
24 11

25  
26 12 \* Contributed equally

27  
28 13 <sup>a</sup> Department of Vascular Medicine, University Medical Centre Utrecht, Heidelberglaan 100, 3584 CX  
29  
30 14 Utrecht, the Netherlands

31  
32 15 <sup>b</sup> Department of Cardiology, University Medical Centre Utrecht, Utrecht, the Netherlands

33  
34 16 <sup>c</sup> Department of Vascular Surgery, University Medical Centre Utrecht, the Netherlands

35  
36 17 <sup>d</sup> Julius Centre for Health Sciences and Primary Care, University Medical Centre Utrecht and Utrecht  
37  
38 18 University, Utrecht, the Netherlands

39  
40 19 <sup>e</sup> Department of Geriatrics, University Medical Centre Utrecht, the Netherlands

41  
42 20 <sup>f</sup> Department of Radiology, University Medical Centre Utrecht, the Netherlands

43  
44 21 <sup>g</sup> Department of Cardiothoracic Surgery, University Medical Centre Utrecht, the Netherlands

45  
46 22 <sup>h</sup> Department of Neurology, University Medical Centre Utrecht, the Netherlands

47  
48 23 <sup>i</sup> Department of Gynaecology and Obstetrics, University Medical Centre Utrecht, the Netherlands

49  
50 24 <sup>j</sup> Department of Nephrology and Hypertension, University Medical Centre Utrecht, the Netherlands

51  
52 25

53  
54 26 Corresponding author: F.L.J. Visseren, e-mail address: [F.L.J.Visseren@umcutrecht.nl](mailto:F.L.J.Visseren@umcutrecht.nl)  
55  
56  
57  
58  
59  
60

1  
2  
3 28 Keywords: cardiovascular disease, risk factor, diabetes mellitus, cohort study, follow up study  
4  
5 29  
6  
7 30 Word count: 5330  
8  
9  
10  
11  
12  
13  
14  
15  
16  
17  
18  
19  
20  
21  
22  
23  
24  
25  
26  
27  
28  
29  
30  
31  
32  
33  
34  
35  
36  
37  
38  
39  
40  
41  
42  
43  
44  
45  
46  
47  
48  
49  
50  
51  
52  
53  
54  
55  
56  
57  
58  
59  
60

For peer review only

**Abstract**

**Purpose:** The Utrecht Cardiovascular Cohort – Second Manifestations of Arterial Disease (UCC-SMART) study is an ongoing prospective single-centre cohort study with the aim to assess important determinants and the prognosis of cardiovascular disease progression. This article provides an update of the rationale, design, included patients, measurements and findings from the start in 1996 to date.

**Participants:** The UCC-SMART study includes patients aged 18-90 years referred to the University Medical Centre (UMC) Utrecht, The Netherlands, for management of cardiovascular disease (CVD) or severe cardiovascular risk factors. Since September 1996, a total of 14,830 patients has been included, of whom 8,603 patients were enrolled because of CVD and 5,684 patients because of cardiovascular risk factors. Upon inclusion patients undergo a standardized screening program including questionnaires, vital signs, laboratory measurements, electrocardiogram, vascular ultrasound of carotid arteries and aorta, ankle-brachial index and ultrasound measurements of adipose tissue, kidney size and intima media thickness. Outcomes of interest are collected through annual questionnaires and adjudicated by an endpoint committee.

**Findings to date:** By May 2022, 14,830 included patients contributed to a total follow-up time of over 134,000 person years. During follow-up, 2,259 patients suffered from a vascular endpoint (including non-fatal myocardial infarction, non-fatal stroke and vascular death) and 2,794 all-cause deaths, 943 incident cases of diabetes and 2,139 incident cases of cancer were observed up until January 2020. The UCC-SMART cohort contributed to over 350 articles published in peer-reviewed journals, including prediction models recommended by the 2021 ESC CVD prevention guidelines.

**Future plans:** The UCC-SMART study is an ongoing cohort in both inclusion and follow-up and provides a large database of information on a population at high cardiovascular risk for future studies to improve understanding of aetiology, prediction and prognosis of cardiovascular disease. It will continue to be expanded with additional measurements and linkage to external registries.

1  
2  
3 55 **Strengths and limitations**  
4  
5

- 6 56 • The Utrecht Cardiovascular Cohort – Second Manifestations of Arterial disease (UCC-  
7 SMART) study is an ongoing cohort of over 14,000 patients with various manifestations of  
8 57 CVD and cardiovascular risk factors  
9  
10 58  
11  
12 59 • The UCC-SMART study covers a long follow-up duration and a comprehensive prospective  
13 capture of outcome data in a high cardiovascular risk population  
14 60  
15  
16 61 • The use of a standardized screening program provides an extended resource of data for research  
17 on cardiovascular disease epidemiology  
18 62  
19  
20 63 • Limitations of the cohort are measurement of the determinants only at baseline for the majority  
21 of patients, and the sparse information on socioeconomic status  
22 64  
23  
24  
25  
26  
27  
28  
29  
30  
31  
32  
33  
34  
35  
36  
37  
38  
39  
40  
41  
42  
43  
44  
45  
46  
47  
48  
49  
50  
51  
52  
53  
54  
55  
56  
57  
58  
59  
60



## 65 **Introduction**

66 Cardiovascular disease (CVD) is the leading cause of morbidity and mortality worldwide, causing  
67 around one-third of all deaths globally in 2019.[1] Atherosclerosis, the dominant cause of CVD, is  
68 fuelled by multiple mutually reinforcing and co-existing risk factors. Because of the progressive nature  
69 of atherosclerosis, patients with established CVD are at high risk of recurrent CVD and mortality.[2,3]  
70 Treatment of cardiovascular risk factors is known to markedly reduce the risk of new cardiovascular  
71 events.[4,5] Slowing down the process of atherosclerosis by timely identification and treatment of  
72 cardiovascular risk factors is therefore of the utmost importance.

73 In 1996, the Second Manifestations of Arterial Disease (SMART) cohort study was set up enrolling  
74 patients newly referred to the University Medical Centre (UMC) Utrecht with clinically manifest CVD  
75 or marked risk factors for atherosclerosis. The study was designed with the aim of determining the  
76 prevalence of concomitant atherosclerotic disease and risk factors, as well as studying the incidence of  
77 future cardiovascular events and its predictors. Furthermore, the SMART study contributes to the  
78 complete and protocolized multidisciplinary care of these high risk patients, by integrating a  
79 standardized set of measurements into usual patient care. The rationale and design of the study were  
80 previously published in 1999[6], with the study containing around 600 patients at that time. In 2018, the  
81 name of SMART changed to Utrecht Cardiovascular Cohort (UCC)-SMART. By now, 26 years after  
82 enrolment of the first patient, many baseline measurements have been added, substudies have been  
83 initiated, the study has been linked to national registries and the data have been used in several large  
84 (inter)national collaborations. At the same time, demographic and guideline changes have led to  
85 differences in the baseline characteristics and absolute risk of the patients included in the cohort. The  
86 aim of the current article is to provide an update on the rationale, design, included patients, baseline  
87 measurements and follow-up to date.

88

## 89 Cohort description

90 The UCC-SMART-study is a single-centre prospective cohort study, ongoing in both inclusion and  
91 follow-up, in which patient care and scientific research concerning cardiovascular risk factors and  
92 disease are integrated. This is depicted in Figure 1 and discussed in more detail in the sections below.

### 94 *Study population*

95 Starting from September 1996, patients aged 18 to 80 years referred to the UMC Utrecht, the  
96 Netherlands, for management of CVD or severe risk factors for CVD, have been recruited. Patients with  
97 cerebrovascular disease (CeVD), coronary artery disease (CAD), abdominal aortic aneurysm (AAA),  
98 peripheral artery disease (PAD), renal artery stenosis or one or more of the following cardiovascular  
99 risk factors, if rated as severe, are eligible to be included: hypertension, hyperlipidaemia, diabetes  
100 mellitus, renal insufficiency and a positive family medical history. Patients with a chronic human  
101 immunodeficiency virus infection as a cardiovascular risk-increasing condition or with hypertensive  
102 pregnancy disorders have been included since 2007 and 2012, respectively. Definitions of the inclusion  
103 criteria are listed in Supplementary Table 1. If patients have a history of multiple vascular events or risk  
104 factors, the referral reason (usually the most recent event) is listed as the qualifying inclusion diagnosis,  
105 and any comorbidities are also registered. Pregnant women, patients with a short life expectancy and  
106 those insufficiently fluent in Dutch are not eligible.

107 Qualifying patients with CVD and/or risk factors listed above are recruited upon their first visit  
108 to the outpatient clinics and hospital wards of the departments of vascular medicine, internal medicine,  
109 nephrology, neurology, cardiology, cardiac surgery, obstetrics and vascular surgery. From 2021  
110 onwards, the outpatient clinic of the department of geriatric medicine has been added to this list and the  
111 maximum age to be eligible for inclusion has been raised from 80 to 90 years old. In case of a recent  
112 cardiovascular event or intervention as the reason for inclusion, patients are invited after discharge from  
113 the hospital. In such cases, baseline measurements were generally performed more than 30 days after  
114 the acute event. All qualifying patients receive written and oral information about study goals and  
115 methods and are included only after written informed consent to use of their data for study goals, the  
116 reporting of incidental findings to their treating physician, indefinite period storage of blood samples

1  
2  
3 117 for future research and follow-up through annual questionnaires. In addition, participants can opt in or  
4  
5 118 out to the following items: retrieval of data from regional and national registries, use of their data in  
6  
7 119 research collaborations with for-profit organizations, use of coded data and laboratory samples for  
8  
9 120 research outside the European Union and possible future requests to participate in follow-up studies of  
10  
11 121 UCC-SMART. When patients do not consent to any of these additional items, they can still partake in  
12  
13 122 the UCC-SMART study. The study is in accordance with the Helsinki declaration and the Good Clinical  
14  
15 123 Practice guidelines, and is approved by the ethics committee of the UMC Utrecht in 1996, 2014 and  
16  
17 124 2022 (reference number 22-088).  
18  
19  
20 125

### 21 22 126 *Baseline data collection*

23  
24 127 The screening program consists of questionnaires, physical examination, an electrocardiogram (ECG),  
25  
26 128 blood, urine and radiology testing. Except for the questionnaires, to be filled out before the hospital visit,  
27  
28 129 the diagnostic components of the program take place during a one-day visit. An overview of all the  
29  
30 130 variables available in UCC-SMART is provided in Supplementary Table 2. Some measurements have  
31  
32 131 only been collected for or starting from a certain time period (Figure 2 and Supplementary Table 3).  
33  
34 132

### 35 36 37 133 *Health questionnaires*

38  
39 134 The questionnaires collect data on medical history including established CVD (CeVD, CAD, AAA and  
40  
41 135 PAD as described in Supplementary Table 4), cardiovascular risk factors, symptoms of CVD (based on  
42  
43 136 the Rose Angina Questionnaire)[7], medication use, family history and lifestyle. For women, a question  
44  
45 137 on the age at menopause (if applicable) is included as well. From 2002 onward, information on obstetric  
46  
47 138 history has been collected including the number of full-term pregnancies, miscarriages (<14 weeks of  
48  
49 139 gestation), preterm deliveries (14 – 32 weeks of gestation), birth weight and pregnancy complications.  
50  
51 140

### 52 53 54 141 *Physical examination*

55  
56 142 Anthropometric measurements are taken by trained (research) nurses and include body height in  
57  
58 143 centimetres, weight in kilograms and waist and hip circumference in centimetres with patients wearing  
59  
60 144 light clothing and no shoes. Weight and length are used to calculate body mass index in kg/m<sup>2</sup>. Waist

1  
2  
3 145 circumference is measured horizontally at the midpoint between the iliac crest and lower costal margin  
4  
5 146 and hip circumference is taken at the maximum horizontal circumference around the gluteal muscles.  
6  
7 147 The mean of two measurements is calculated. If the two measurements differ by >2 cm, a third is taken  
8  
9 148 and the mean of the closest two is calculated.  
10

11 149 From 1996 up until 1999, office blood pressure was measured using a semiautomatic  
12  
13 150 oscillometric device (Omega 1400; Invivo Research Laboratories Inc., Broken Arrow, OK, USA) every  
14  
15 151 4 minutes for a total of 25 minutes at the right brachial artery in supine position and the mean systolic  
16  
17 152 (SBP) and diastolic blood pressure (DBP) were calculated. From April 1999 until 2015, using a non-  
18  
19 153 random sphygmomanometer (Iso-Stabil 5; Speidel & Keller, Jungingen, Germany), 3 simultaneous  
20  
21 154 measurements with an interval of 30 seconds were taken at both upper arms in upright position and the  
22  
23 155 SBP and DBP of the last two measurements were calculated from the arm yielding the highest values.  
24  
25 156 From 2015 onward, office blood pressure has been measured using an automatic oscillometric device  
26  
27 157 (Microlife WatchBP Office AFIB; Microlife Corp, Widnau, Switzerland). The measurement is being  
28  
29 158 performed unattended, in triplicate with an interval of 30 seconds, at both upper arms in supine position  
30  
31 159 after the patient has rested for 30 seconds. The measurements on the arm with the highest blood pressure  
32  
33 160 are recorded and the mean SBP and DBP is calculated.  
34  
35

36  
37 161 In order to calculate the ankle-brachial index (ABI), blood pressure measurements are taken at  
38  
39 162 rest at both upper arms every two minutes whilst the blood pressure is measured at both lower legs. For  
40  
41 163 this, a Falcon Quad 8 MHz Doppler probe (Viasonix, Ra'anana, Israel) is used at a 60° angle at the  
42  
43 164 dorsal pedal and posterior tibial arteries. The ABI is defined for each leg as the highest SBP at the ankle  
44  
45 165 divided by the highest brachial SBP.  
46  
47

48 166

#### 49 167 *Laboratory testing*

50  
51 168 On the day of screening, a venous blood sample is drawn after at least eight hours of fasting to measure  
52  
53 169 glucose, total cholesterol, high-density lipoprotein cholesterol (HDL-C), triglycerides, creatinine, and  
54  
55 170 haemoglobin. Laboratory measurements of fasting insulin, C-reactive protein (CRP) and thyroid  
56  
57 171 stimulating hormone (TSH) were added in 2003 and glycated haemoglobin (HbA1c) and apolipoprotein  
58  
59 172 B (apoB) were added in 2006. Lastly, measurement of lipoprotein(a) was added in June 2020.  
60

1  
2  
3 173 Glucose is measured using an enzymatic colorimetric assay (Beckman Coulter, Brea, CA,  
4  
5 174 USA). Total cholesterol and triglycerides are measured using a commercial enzymatic dry chemistry kit  
6  
7 175 (Johnson & Johnson, New Brunswick, NJ, USA) and HDL-C with a commercial enzymatic kit  
8  
9 176 (Boehringer, Mannheim, Germany). Low-density lipoprotein cholesterol (LDL-C) is calculated using  
10  
11 177 the Friedewald formula up to a plasma triglyceride level of 9 mmol/L.[8] Estimated glomerular filtration  
12  
13 178 rate (eGFR) is calculated using the Chronic Kidney Disease Epidemiology Collaboration (CKD-EPI)  
14  
15 179 formula.[9] Spectrophotometry (Abbott Diagnostics, Santa Clara, CA, USA) is used to determine  
16  
17 180 haemoglobin levels. CRP in plasma was initially determined using immunonephelometry  
18  
19 181 (Nephelometer Analyzer BN II, Siemens, The Hague, The Netherlands) and from 2013 in heparin  
20  
21 182 plasma on an AU5811 routine chemistry analyser (Beckman Coulter, Brea, CA, USA). Before  
22  
23 183 November 2006, TSH was quantified using a third-generation assay on a Centaur analyser (Bayer,  
24  
25 184 Germany). Since December 2006, TSH has been measured by a third-generation assay on a DXi analyser  
26  
27 185 (Beckman Coulter, Woerden, The Netherlands). Correlation between the two analysers was  $r = 0.9991$   
28  
29 186 ( $n = 69$ ), with an intercept of  $-0.05$  mU/L (95%CI 0.22-0.12) and a slope of 1.04 (95%CI 1.029–1.052)  
30  
31 187 (range 0–95 mU/L). ApoB and lipoprotein(a) are measured using nephelometry (Atellica Neph 630,  
32  
33 188 Siemens, The Hague, The Netherlands). A morning-void urine sample is collected to determine urine  
34  
35 189 albumin, creatinine, sodium and potassium levels. Urine albumin is measured using  
36  
37 190 immunoturbidimetric assays. Ion selective electrode (Beckman Coulter, Brea, CA, USA) is used to  
38  
39 191 determine urine sodium and potassium levels. DNA can be isolated from 10 mL of EDTA-augmented  
40  
41 192 blood stored at  $-80^{\circ}$  for genotyping.  
42  
43  
44  
45

193

#### 194 *Radiology testing*

49 195 Non-invasive vascular imaging testing is performed by specially trained ultrasound technicians. Duplex  
50  
51 196 examination of the carotid arteries is conducted to assess possible stenosis using peak systolic velocity  
52  
53 197 measurements at the brachiocephalic trunk, carotid arteries (mid- and distal common, external and  
54  
55 198 proximal and distal internal) and vertebral arteries (proximal and distal). Measurements are performed  
56  
57 199 using an EPIQ-7 ultrasound machine (Philips Medical Systems, Eindhoven, The Netherlands). In case  
58  
59 200 of abnormal signals and/or retrograde flow in the vertebral arteries, the proximal subclavian arteries are

1  
2  
3 201 evaluated in search of severe stenosis or occlusion. For research purposes, intima-media-thickness  
4  
5 202 (IMT) of the carotid arteries is measured using a linear array transducer. With the patient lying down  
6  
7 203 and the head turned 45° away from the side investigated, the ultrasound frame yielding an optimal  
8  
9 204 longitudinal picture of the common carotid arterial wall is frozen at the time of the R-peak of ECG  
10  
11 205 recording. Over a length of 1 cm starting from the carotid bulb towards proximal direction, the arterial  
12  
13 206 wall thickness is measured from the lumen-intima interface to the media-adventitia interface. The mean  
14  
15 207 of measurements in anterolateral, lateral and posterolateral directions is calculated.

16  
17  
18 208 Abdominal ultrasound examination is performed using the same ultrasound machine to obtain  
19  
20 209 the maximal anterior-posterior diameter of the juxtarenal and infrarenal abdominal aorta and kidney  
21  
22 210 length and volume. As of January 2000, visceral and subcutaneous adipose tissue measurements have  
23  
24 211 been taken as well. The amount of subcutaneous fat is estimated by the distance from the linea alba to  
25  
26 212 the skin. Visceral adipose tissue thickness is measured as the distance between the lumbar spine and the  
27  
28 213 peritoneum. Measurements are taken at the end of quiet expiration on a frozen ultrasound frame at three  
29  
30 214 points on the imaginary transversal line halfway between the iliac crest and lower costal margin: at the  
31  
32 215 midsternal line and 10 cm to the left and right on the transversal line. Each measurement is taken three  
33  
34 216 times and then the mean of the measurements is recorded as the actual thickness. Moreover, from  
35  
36 217 September 1998 on, a protocolized 12-lead resting ECG has been recorded.

37  
38  
39 218 In the near future, echocardiography will be added to the UCC-SMART program to facilitate  
40  
41 219 research on the presence of heart failure at baseline. Echocardiography will be performed using a Philips  
42  
43 220 Affiniti 70 ultrasound machine (Philips Medical Systems, Andover, MA, USA) by using a specific  
44  
45 221 protocol involving 2-dimensional (2D), M-mode, Doppler, tissue Doppler and 2D speckle tracking  
46  
47 222 (STE) imaging in accordance with the European Association of Cardiovascular Imaging 2016  
48  
49 223 recommendations for chamber quantification.[10] In particular, left ventricular dimensions will be  
50  
51 224 measured in order to calculate the left ventricular mass index.[11] Left ventricular ejection fraction will  
52  
53 225 be assessed quantitatively, preferably with automated three-dimensional imaging or alternatively with  
54  
55 226 the Simpsons biplane method. Left atrial maximal volume and right ventricular dimensions and function  
56  
57 227 will be measured as recommended.[10] Multiple parameters of left ventricular diastolic function will be  
58  
59 228 assessed, including pulsed-wave Doppler of the mitral inflow and tissue Doppler imaging of the mitral

1  
2  
3 229 annulus motion. Left ventricular diastolic function will be evaluated according to current diagnostic  
4  
5 230 algorithms.[12] A minimal of 3 sequential complexes will be recorded. Standard image analysis will be  
6  
7 231 then performed off-line in accordance with clinical guidelines using Philips IntelliSpace Cardiovascular  
8  
9 232 software and will include 2D STE analysis of the left ventricle and left atrium.  
10

11 233

#### 12 234 *Treatment recommendation*

13  
14  
15 235 After completion of the screening, the findings are assessed by a multidisciplinary team of two medical  
16  
17 236 specialists (internist, cardiologist, neurologist or vascular surgeon). A treatment recommendation is  
18  
19 237 formulated based on current applicable guidelines, according to which patients are already treated by  
20  
21 238 their general practitioner or medical specialist. The screening results and treatment recommendation are  
22  
23 239 reported in a medical letter which is sent to the treating specialist and general practitioner. Patients  
24  
25 240 receive a summary of relevant findings and recommendations.  
26  
27

28 241 Incidental medical findings during the screening are reported to one of the study physicians and  
29  
30 242 if needed, discussed with specialists from the multidisciplinary team. The findings are added to the  
31  
32 243 medical record and sent to the treating specialist or general practitioner for further action.  
33  
34

35 244

#### 36 245 *Follow-up*

37  
38  
39 246 Patients receive annual questionnaires with questions on hospital admissions and outpatient clinic visits,  
40  
41 247 regardless of whether they are still under the care of the UMC Utrecht. In case patients no longer wish  
42  
43 248 to complete the questionnaires, they are asked if they consent to collection of information from their  
44  
45 249 general practitioner. When the replies indicate possible outcome events, additional information is  
46  
47 250 collected through hospital discharge letters and relevant laboratory and radiology examinations. Clinical  
48  
49 251 events of interest include stroke, myocardial infarction, heart failure, AAA rupture, renal insufficiency,  
50  
51 252 vascular interventions, bleeding, diabetes and vascular and non-vascular mortality as defined in  
52  
53 253 Supplementary Table 5. Incident type 2 diabetes has been assessed since July 2006. To assess incident  
54  
55 254 diabetes between 1996 and 2006, a questionnaire was sent to all patients without diabetes at baseline  
56  
57 255 who were included before July 2006. Incident heart failure has been assessed since October 2011.  
58  
59 256 Subsequently, three members from the endpoint committee independently judge reported events. The  
60

1  
2  
3 257 endpoint committee consists of medical specialists from the recruiting departments. If all three  
4  
5 258 physicians judge differently, the event is discussed with two other physicians from the committee to  
6  
7 259 reach consensus. Secondary outcomes are adjudicated by trained research nurses. As of 2021, diagnoses  
8  
9 260 of dementia and mild cognitive impairment have been added to the annual questionnaire as a self-  
10  
11 261 reported diagnoses  
12

13  
14 262

### 15 263 *Linkage to external registries*

16  
17  
18 264 Data in the UCC-SMART study can be enriched by collecting data from various registries and  
19  
20 265 organizations, for example to obtain additional information on outcomes and medication use. Some  
21  
22 266 examples of this linkage so far are described below.  
23  
24

25 267

### 26 27 268 *Netherlands Cancer Registry*

28  
29  
30 269 CVD and cancer share many risk factors and pathophysiological mechanisms, including body fat  
31  
32 270 distribution, diet, physical inactivity, smoking, chronic inflammation burden, and oxidative stress.[13]  
33  
34 271 To evaluate the relation between several cardiovascular risk factors and the risk of cancer, the UCC-  
35  
36 272 SMART cohort has been linked to the Netherlands Comprehensive Cancer Organisation (IKNL), a  
37  
38 273 nationwide registry receiving notifications of all new cancer diagnoses. By linking the cohort to the  
39  
40 274 national cancer registry several times, with the most recent linkage taking place in 2022, information on  
41  
42 275 cancer incidence and details of cancer types and histopathology was obtained.  
43  
44

45 276

### 46 277 *Central Agency for Statistics (CBS) Netherlands*

47  
48  
49 278 The UCC-SMART cohort can be linked to *Statistic Netherlands* (also known as CBS), which contains  
50  
51 279 data on ICD-10 coded diagnoses and hospital admissions since 1996. This allows for, amongst others,  
52  
53 280 collection of endpoints that are not regularly collected in UCC-SMART or have been collected from a  
54  
55 281 later time point, such as heart failure diagnoses.  
56

57 282

### 58 59 283 *Utrecht Patient Oriented Database (UPOD)* 60



1  
2  
3 284 The UCC-SMART cohort can be linked to UPOD[14], a database containing electronic patient data of  
4  
5 285 patients treated at the UMC Utrecht. This database has been collecting patient characteristics,  
6  
7 286 medication orders, laboratory test results, hospital discharge diagnoses and medical procedures since  
8  
9 287 2000.  
10

11 288

#### 13 289 *Consortia*

15 290 The data collected in UCC-SMART is added to several consortia such as a genetics consortium  
17  
18 291 (GENIUS-CHD[15] on genetics of subsequent coronary heart disease), the Netherlands consortium of  
19  
20 292 dementia cohorts and the Chronic Kidney Disease Prognosis Consortium[16].  
21

22 293

#### 24 294 *Substudies*

##### 26 295 *SMART-2*

28 296 Patients with a history of CVD or diabetes are invited to participate in the SMART-2 substudy. In this  
29  
30 297 study, the baseline measurements of UCC-SMART are repeated in order to investigate the course of  
31  
32 298 atherosclerosis and vascular risk factors over time, and to evaluate the effects of treatment. Until May  
33  
34 299 2022, 2,313 patients have participated in UCC-SMART-2 after a median of 9.9 years (IQR 9.2 – 10.8)  
35  
36 300 since their inclusion in UCC-SMART. As with UCC-SMART, the findings of UCC-SMART-2 with an  
37  
38 301 accompanying treatment recommendation are communicated to the patient, his or her treating medical  
39  
40 302 specialist and general practitioner.  
41

42 303

##### 45 304 *SMART-ORACLE*

47 305 SMART-ORACLE aims to determine the additional value of contrast-enhanced computed tomography  
48  
49 306 (CT) of the coronary and carotid arteries on top of traditional cardiovascular risk factors in patients with  
50  
51 307 a history of CVD, diabetes or hypertension.[17] The study is still ongoing and has currently been  
52  
53 308 conducted in 1,252 patients.  
54

55 309

##### 58 310 *SMART-MR and SMART Medea*

1  
2  
3 311 SMART-MR and SMART Medea target the investigation of brain changes in patients with CVD using  
4  
5 312 1.5T magnetic resonance imaging (MRI) (and 7T MRI in a subset of patients).[18,19] This study was  
6  
7 313 conducted in 1,309 patients. Amongst others, measurements of the total cerebral blood flow have been  
8  
9 314 performed and characteristics of white matter lesions and microbleeds have been mapped.

315

#### 316 *Athero-Express*

317 In May 2022, the Athero-Express biobank and study cohort have been incorporated into the UCC-  
318 SMART study.[20] The objective of Athero-Express is to investigate the value of plaque characteristics  
319 in relation to long term cardiovascular events. This ongoing prospective study, initiated in April 2002,  
320 includes patients undergoing femoral or carotid endarterectomy. During surgery, the atherosclerotic  
321 plaque is harvested and immunohistochemically stained in order to assess fat, collagen, macrophages and  
322 smooth muscle cells.

323

#### 324 *Other substudies*

325 Several other substudies have been carried out within the UCC-SMART cohort. As part of **SMART-**  
326 **Junior**, additional questionnaires have been sent to 4,270 patients in order to investigate the presence  
327 of cardiovascular risk factors and CVD in their offspring.[21] In **DISH**, diffuse idiopathic skeletal  
328 hyperostosis was scored on chest X-rays of 4,791 patients, performed in the context of health care, using  
329 the Resnick criteria.[22,23] **SMART-HEART** aimed to detect patient characteristics related to the  
330 development of left ventricle hypertrophy using 1.5T cardiac MRI in 536 patients with hypertension,  
331 but free of known coronary or valvular disease.[24] In order to determine whether intima and media  
332 calcification differ in their associated CVD risks and to elucidate which risk factors lead to the  
333 development of those types of calcification, CT-scans of the femoral head to the feet have been  
334 performed in 520 patients as part of **ARTEMIS**.[25] The aim of the **Small aneurysms trial** was to  
335 estimate the overall rupture rates of small AAAs and to investigate demographic characteristics and  
336 cardiovascular risk factors for association with AAA growth using ultrasound scanning of the aorta in  
337 230 patients with an initial AAA diameter of 30-55 mm.[26] In **Brown adipose tissue**, supraclavicular  
338 and subcutaneous adipose tissue fat-signal-fractions were assessed in 50 patients with CVD using 1.5T

1  
2  
3 339 water-fat MRI.[27] **SPAIN** evaluated the feasibility of a web-based coaching program for vascular risk  
4  
5 340 factor treatment, described the patterns of use of this program and measured changes in risk factors in  
6  
7 341 50 patients with CVD.[28] **RULE** investigated the impact of the UCC-SMART study compared to usual  
8  
9 342 care on cardiovascular risk factors in 604 patients with CVD or type 2 diabetes.[29]

11 343 A few clinical trials have been conducted within the UCC-SMART study. **TEMPUS** was a  
12  
13 344 randomized crossover trial in 78 patients that investigated the effects of a cardiovascular polypill on  
14  
15 345 LDL-C, ambulatory blood pressure and adherence as compared to the administration of the individual,  
16  
17 346 identically dosed components of the polypill.[30] **SMART-Inform** was a three-armed randomized  
18  
19 347 controlled trial (RCT) in 303 patients using a statin with CVD.[31] The aim was to determine whether  
20  
21 348 communicating personalized statin therapy-effects leads to lower decisional conflicts associated with  
22  
23 349 statin use compared with standardized (non-personalized) therapy-effects. **BEST** was an RCT  
24  
25 350 investigating whether a clearly written agreement on risk factor management between general  
26  
27 351 practitioners and hospitals improved the vascular risk profile of 197 patients compared with usual  
28  
29 352 care.[32] Another RCT was **VENUS**, which included 236 patients with  $\geq 2$  modifiable risk factors,  
30  
31 353 investigating whether risk factor management in the hospital improved with nurse practitioner care on  
32  
33 354 top of usual care compared with usual care alone.[33] Lastly, **IRIS** was an RCT that evaluated whether  
34  
35 355 an internet-based vascular risk factor management program promoting self-efficacy on top of usual care  
36  
37 356 is more effective than usual care alone in reducing vascular risk factors in 330 patients with CVD.[34]  
38  
39 357 Supplementary Table 6 provides a detailed overview of the substudies. A timeline showing the different  
40  
41 358 substudies is presented in Supplementary Figure 1.  
42  
43  
44  
45  
46

#### 47 360 *Data quality and management*

49 361 Data collected in the UCC-SMART program is stored in the electronic medical record of the UMC  
50  
51 362 Utrecht. Blood samples (serum, citrate plasma, EDTA plasma and erythrocytes concentrate aliquots) are  
52  
53 363 stored at -80°C according to the Biobanks Regulations to be found at the UMC Utrecht website  
54  
55 364 (<https://www.umcutrecht.nl/nl/centrale-biobank>). The central biobank of the UMC Utrecht is ISO9001  
56  
57 365 certified (certificate number 2175592). Release of material for future research is reviewed by the UMC  
58  
59 366 Utrecht Biobanks Review Committee.

1  
2  
3 367 Recorded data is downloaded from the electronic medical record and pseudonymized by the  
4  
5 368 data manager who holds the encryption key, only to be accessed after permission of the principal  
6  
7 369 investigator. The UCC-SMART study group periodically performs quality checks for missing values  
8  
9 370 and inconsistencies compared to source documents, or values outside of the range deemed likely.  
10

11 371

### 12 372 *Patient and public involvement*

13  
14 373 Patients were not involved in the study design. Their experiences of burden and required time are  
15  
16 374 considered in the implementation of new components in the program. Relevant findings of the UCC-  
17  
18 375 SMART screening program and corresponding recommendations are sent to the patients. In addition,  
19  
20 376 patients regularly receive a newsletter containing up-to-date facts and figures of the UCC-SMART study  
21  
22 377 and substudies and findings of publications using UCC-SMART data. The UMC Utrecht policies are in  
23  
24 378 line with open science, for opening up the research agenda to societal stakeholders, open research data  
25  
26 379 and open access publications.  
27  
28  
29

30 380

### 31 381 *Characteristics of study population*

32  
33 382 By May 2022, a total of 14,830 patients has been included (Figure 3). Of those, 3,294 patients died and  
34  
35 383 1,546 patients are lost to follow-up. Reasons for loss to follow-up include withdrawal of informed  
36  
37 384 consent or being unreachable for further questionnaires. Figure 4 shows the numbers and distribution of  
38  
39 385 the reasons for inclusion. The most common inclusion diagnosis was CAD (n = 4,729), followed by  
40  
41 386 hypertension (n = 2,344) and CeVD (n = 2,276). PAD was the enrolment diagnosis in 1,173 patients  
42  
43 387 and AAA in 369 patients. Hyperlipidaemia was the inclusion diagnosis in 1,433 patients and diabetes  
44  
45 388 mellitus in 730 patients.  
46  
47  
48

49 389 Patient characteristics, medication use and measurements at baseline are listed in Table 1. This table  
50  
51 390 is stratified for medical history at baseline, with the items of medical history either being the inclusion  
52  
53 391 diagnosis or a comorbidity. This means that patients may fall into more than one category as listed in  
54  
55 392 Table 1. The majority of patients included in the cohort is male (65%), especially among the subgroup  
56  
57 393 of patients with established CVD (73% men, 27% women). The mean age of the total population is 56.8  
58  
59  
60

1  
2  
3 394 ±12.5 years. In total, 2,608 individuals (18%) had diabetes and 9,633 individuals (65%) had established  
4  
5 395 CVD at inclusion. Of these CVD patients, 1,399 (15%) have polyvascular disease, i.e. multiple vascular  
6  
7 396 beds (cerebral, coronary, abdominal aorta or lower extremity) being affected. The proportion of missing  
8  
9 397 variables is less than 3% for all variables, except for adipose tissue measurements on ultrasound (3.6%),  
10  
11 398 albuminuria (4.7%) and CRP level (9.0%). Vascular screening indicated significant carotid artery  
12  
13 399 stenosis (>50% occlusion) in 526 (4%) patients, AAA in 188 (1%) patients and low ABI ( $\leq 0.9$ ) in 829  
14  
15 400 (6%) patients who were not previously diagnosed with CeVD, AAA or PAD, respectively. Of the 3095  
16  
17 401 patients with established CVD included between 2012 and 2022 (to account for applicable guidelines),  
18  
19 402 2075 (67%) had a SBP  $< 140$  mmHg, 753 (25%) had a LDL-C  $\leq 1.8$  and 2737 (88%) were using  
20  
21  
22 403 antithrombotic agents at baseline.  
23  
24  
25  
26  
27  
28  
29  
30  
31  
32  
33  
34  
35  
36  
37  
38  
39  
40  
41  
42  
43  
44  
45  
46  
47  
48  
49  
50  
51  
52  
53  
54  
55  
56  
57  
58  
59  
60

404 **Table 1. Baseline characteristics stratified for medical history**

|                                    | History of CVD          |                         |                           |                           | Cardiovascular risk factors |                              |                                |                     |
|------------------------------------|-------------------------|-------------------------|---------------------------|---------------------------|-----------------------------|------------------------------|--------------------------------|---------------------|
|                                    | Cerebrovascular disease | Coronary artery disease | Abdominal aortic aneurysm | Peripheral artery disease | Hypertension                | Hyperlipidaemia <sup>a</sup> | Diabetes mellitus (type 1 + 2) | Renal insufficiency |
| Number of patients                 | 2801                    | 5999                    | 767                       | 1646                      | 8228                        | 12972                        | 2608                           | 1118                |
| <b>Medical history<sup>a</sup></b> |                         |                         |                           |                           |                             |                              |                                |                     |
| Cerebrovascular disease            | 2801 (100)              | 553 (9)                 | 117 (15)                  | 209 (13)                  | 1655 (20)                   | 2492 (19)                    | 442 (17)                       | 248 (22)            |
| Coronary artery disease            | 553 (20)                | 5999 (100)              | 322 (42)                  | 433 (26)                  | 3192 (39)                   | 5762 (44)                    | 1131 (43)                      | 497 (44)            |
| Abdominal aortic aneurysm          | 117 (4)                 | 322 (5)                 | 767 (100)                 | 134 (8)                   | 466 (6)                     | 693 (5)                      | 114 (4)                        | 151 (14)            |
| Peripheral artery disease          | 209 (7)                 | 433 (7)                 | 134 (17)                  | 1646 (100)                | 906 (11)                    | 1492 (12)                    | 328 (13)                       | 205 (18)            |
| Hypertension                       | 1655 (60)               | 3192 (54)               | 466 (62)                  | 906 (57)                  | 8228 (100)                  | 7285 (57)                    | 1736 (68)                      | 902 (82)            |
| Hyperlipidaemia                    | 2492 (90)               | 5762 (96)               | 693 (91)                  | 1492 (92)                 | 7285 (90)                   | 12972 (100)                  | 2275 (88)                      | 1016 (92)           |
| Diabetes mellitus                  | 442 (16)                | 1131 (19)               | 114 (15)                  | 328 (20)                  | 1736 (21)                   | 2275 (18)                    | 2608 (100)                     | 365 (33)            |
| <b>Health questionnaire</b>        |                         |                         |                           |                           |                             |                              |                                |                     |
| Age (years)                        | 60.0 ± 11.2             | 61.5 ± 9.5              | 65.2 ± 9.3                | 59.9 ± 10.6               | 58.7 ± 11.7                 | 58.0 ± 11.7                  | 59.3 ± 12.1                    | 63.4 ± 11.3         |
| Male sex                           | 1744 (62)               | 4849 (81)               | 636 (83)                  | 1100 (67)                 | 5174 (63)                   | 8699 (67)                    | 1815 (70)                      | 911 (82)            |
| Previous or current smoking        | 2106 (76)               | 4511 (75)               | 661 (86)                  | 1473 (90)                 | 5697 (69)                   | 9265 (72)                    | 1865 (72)                      | 847 (76)            |
| Packyears in (former) smokers      | 20.2 (9.4 – 35.1)       | 20.7 (9.4 – 33.6)       | 28.0 (13.8 – 42.3)        | 27.9 (14.6 – 40.6)        | 18.9 (8.3 – 33.3)           | 18.9 (8.8 – 32.5)            | 21.0 (9.5 – 36.2)              | 22.8 (10.5 – 37.8)  |
| Current alcohol use                | 1484 (53)               | 3641 (61)               | 368 (48)                  | 770 (47)                  | 4787 (58)                   | 7584 (59)                    | 1229 (47)                      | 511 (46)            |
| Highest level of education         |                         |                         |                           |                           |                             |                              |                                |                     |
| - Primary/secondary school         | 554 (31)                | 1248 (29)               | 128 (34)                  | 315 (40)                  | 1764 (31)                   | 2569 (29)                    | 553 (35)                       | 210 (32)            |
| - Vocational school                | 631 (35)                | 1466 (35)               | 117 (31)                  | 236 (30)                  | 1824 (32)                   | 2891 (33)                    | 519 (33)                       | 223 (34)            |
| - University (of applied science)  | 560 (31)                | 1415 (33)               | 125 (33)                  | 196 (25)                  | 1914 (34)                   | 3031 (35)                    | 422 (27)                       | 194 (30)            |
| Exercise (METH/week)               | 0.0 (0.0 – 10.5)        | 0.0 (0.0 – 12.0)        | 0 (0.0 – 6.0)             | 0 (0.0 – 5.5)             | 0 (0.0 – 11.0)              | 0 (0.0 – 12.0)               | 0 (0.0 – 6.0)                  | 0 (0.0 – 5.5)       |
| <b>Medication use</b>              |                         |                         |                           |                           |                             |                              |                                |                     |
| Lipid-lowering therapy             | 1682 (60)               | 4995 (83)               | 417 (54)                  | 849 (52)                  | 4720 (57)                   | 8253 (64)                    | 1664 (64)                      | 678 (61)            |
| Antihypertensive therapy           | 1724 (62)               | 5409 (90)               | 545 (71)                  | 912 (55)                  | 7130 (87)                   | 9080 (70)                    | 1980 (76)                      | 965 (86)            |

|                                      |                   |                  |                   |                   |                   |                  |                   |                     |
|--------------------------------------|-------------------|------------------|-------------------|-------------------|-------------------|------------------|-------------------|---------------------|
| Platelet inhibitors                  | 2062 (74)         | 5263 (88)        | 450 (59)          | 987 (60)          | 4532 (55)         | 7694 (59)        | 1453 (56)         | 640 (57)            |
| Oral anticoagulant therapy           | 311 (11)          | 821 (14)         | 123 (16)          | 234 (14)          | 743 (9)           | 1188 (9)         | 271 (10)          | 182 (16)            |
| Glucose lowering therapy             | 287 (10)          | 757 (13)         | 67 (9)            | 189 (11)          | 1176 (14)         | 1475 (11)        | 1621 (62)         | 216 (19)            |
| <b>Anthropometric measurements</b>   |                   |                  |                   |                   |                   |                  |                   |                     |
| Systolic blood pressure (mmHg)       | 141 ± 22          | 137 ± 20         | 142 ± 20          | 144 ± 21          | 150 ± 23          | 140 ± 22         | 144 ± 21          | 150 ± 24            |
| Diastolic blood pressure (mmHg)      | 82 ± 12           | 80 ± 11          | 83 ± 12           | 81 ± 11           | 87 ± 14           | 83 ± 13          | 82 ± 12           | 85 ± 14             |
| Ankle-brachial index ≤ 0.9           | 398 (14)          | 680 (11)         | 165 (22)          | 1063 (66)         | 1195 (15)         | 1751 (14)        | 434 (17)          | 283 (26)            |
| Body mass index (kg/m <sup>2</sup> ) | 26.6 ± 4.2        | 27.3 ± 4.0       | 26.4 ± 3.8        | 26.3 ± 4.3        | 27.6 ± 4.6        | 27.0 ± 4.3       | 28.7 ± 5.0        | 27 ± 4              |
| Waist circumference (cm)             | 93.7 ± 12.9       | 97.4 ± 11.6      | 97.6 ± 12.1       | 95.0 ± 12.5       | 96.4 ± 13.3       | 95.1 ± 12.7      | 100.7 ± 13.7      | 98.9 ± 12.5         |
| Hip circumference (cm)               | 103.6 ± 8.7       | 104.2 ± 7.6      | 103.8 ± 7.8       | 103.0 ± 8.7       | 105.1 ± 9.2       | 104.1 ± 8.5      | 106.3 ± 9.8       | 104.4 ± 8.4         |
| Visceral fat (cm)                    | 8.6 ± 2.6         | 9.3 ± 2.6        | 9.5 ± 2.6         | 9.2 ± 2.7         | 9.0 ± 2.8         | 8.8 ± 2.7        | 10.1 ± 2.9        | 9.9 ± 2.8           |
| Subcutaneous fat (cm)                | 2.5 ± 1.2         | 2.4 ± 1.2        | 2.2 ± 1.1         | 2.4 ± 1.5         | 2.6 ± 1.4         | 2.5 ± 1.3        | 2.4 ± 1.4         | 2.2 ± 1.4           |
| Carotid artery stenosis              | 652 (24)          | 443 (8)          | 84 (11)           | 255 (16)          | 77 (10)           | 1104 (9)         | 283 (11)          | 181 (16)            |
| cIMT (mm)                            | 0.9 (0.7 – 1.0)   | 0.9 (0.7 – 1.0)  | 0.9 (0.8 – 1.1)   | 0.9 (0.8 – 1.1)   | 0.8 (0.7 – 1.0)   | 0.8 (0.7 – 1.0)  | 0.9 (0.7 – 1.0)   | 0.9 (0.8 – 1.1)     |
| Aortic aneurysm                      | 81 (3)            | 244 (4)          | 307 (41)          | 72 (4)            | 289 (4)           | 458 (4)          | 61 (2)            | 108 (10)            |
| Kidney size (cm)                     | 11.1 ± 1.0        | 11.3 ± 1.0       | 11.3 ± 1.0        | 11.2 ± 1.1        | 11.2 ± 1.0        | 11.2 ± 1.0       | 11.5 ± 1.0        | 10.9 ± 1.3          |
| <b>Laboratory measurements</b>       |                   |                  |                   |                   |                   |                  |                   |                     |
| Haemoglobin (mmol/L)                 | 8.9 ± 0.8         | 8.9 ± 0.8        | 8.8 ± 0.9         | 8.9 ± 0.9         | 8.9 ± 0.8         | 8.9 ± 0.8        | 8.8 ± 0.9         | 8.5 ± 1.0           |
| Total cholesterol (mmol/L)           | 4.9 ± 1.2         | 4.5 ± 1.1        | 5.1 ± 1.3         | 5.3 ± 1.3         | 5.0 ± 1.3         | 5.1 ± 1.4        | 4.7 ± 1.3         | 5.0 ± 1.4           |
| LDL-C (mmol/L)                       | 2.9 ± 1.1         | 2.6 ± 0.9        | 3.1 ± 1.1         | 3.2 ± 1.1         | 2.9 ± 1.1         | 3.1 ± 1.2        | 2.7 ± 1.0         | 2.9 ± 1.1           |
| HDL-C (mmol/L)                       | 1.3 ± 0.4         | 1.2 ± 0.3        | 1.2 ± 0.4         | 1.2 ± 0.4         | 1.3 ± 0.4         | 1.3 ± 0.4        | 1.2 ± 0.3         | 1.2 ± 0.4           |
| Apolipoprotein B (g/L)               | 0.8 ± 0.3         | 0.8 ± 0.2        | 0.9 ± 0.2         | 0.9 ± 0.3         | 0.9 ± 0.3         | 0.9 ± 0.3        | 0.9 ± 0.3         | 0.9 ± 0.3           |
| Triglycerides (mmol/L)               | 1.3 (0.9 – 1.9)   | 1.4 (1.0 – 2.0)  | 1.5 (1.1 – 2.1)   | 1.5 (1.1 – 2.3)   | 1.4 (1.0 – 2.1)   | 1.4 (1.0 – 2.1)  | 1.6 (1.1 – 2.4)   | 1.7 (1.2 – 2.5)     |
| HbA1c (%)                            | 5.6 (5.4 – 6.0)   | 5.7 (5.4 – 6.1)  | 5.7 (5.4 – 6.1)   | 5.8 (5.5 – 6.5)   | 5.7 (5.4 – 6.2)   | 5.6 (5.4 – 6.1)  | 6.9 (6.3 – 7.8)   | 5.9 (5.5 – 6.9)     |
| Fasting glucose (mmol/L)             | 5.7 (5.3 – 6.3)   | 5.9 (5.4 – 6.6)  | 5.8 (5.4 – 6.5)   | 5.8 (5.3 – 6.7)   | 5.8 (5.4 – 6.6)   | 5.8 (5.3 – 6.4)  | 8.1 (6.9 – 10.0)  | 6.0 (5.5 – 7.2)     |
| eGFR (mL/min/1.73 m <sup>2</sup> )   | 47.7 ± 39.9       | 63.12 ± 34.3     | 58.2 ± 32.3       | 51.2 ± 39.9       | 48.7 ± 40.4       | 53.6 ± 40.4      | 55.4 ± 40.5       | 39.8 ± 25.6         |
| Albuminuria (mg/L)                   | 10.0 (6.0 – 24.1) | 9.0 (6.0 – 20.0) | 12.9 (8.0 – 39.9) | 11.0 (7.0 – 32.0) | 11.0 (7.0 – 29.0) | 9.0 (6.0 – 22.0) | 14.0 (8.0 – 41.0) | 82.0 (16.0 – 257.6) |
| CRP (mg/L)                           | 2.1 (1.0 – 4.5)   | 1.9 (1.0 – 4.0)  | 3.3 (1.6 – 6.9)   | 3.1 (1.4 – 6.3)   | 2.2 (1.0 – 4.7)   | 2.0 (1.0 – 4.2)  | 2.4 (1.1 – 5.1)   | 3.2 (1.5 – 7.2)     |
| TSH (mU/L)                           | 1.7 (1.2 – 2.5)   | 1.7 (1.2 – 2.5)  | 1.7 (1.2 – 2.5)   | 1.7 (1.2 – 2.5)   | 1.8 (1.2 – 2.6)   | 1.8 (1.2 – 2.5)  | 1.9 (1.3 – 2.7)   | 1.8 (1.3 – 2.7)     |

1  
2  
3 405 Data are presented as number (percentage), mean  $\pm$  standard difference or median (interquartile range).  
4

5 406 <sup>a</sup> Based on inclusion diagnosis, items of the health questionnaire and/or measurements at baseline:

6  
7 407 Cerebrovascular disease: history of stroke, carotid surgery or percutaneous transluminal angioplasty;

8 408 Coronary artery disease: history of myocardial infarction, cardiac arrest, coronary bypass surgery or percutaneous transluminal coronary angioplasty;

9 409 Abdominal aortic aneurysm: history of abdominal aortic aneurysm, transluminal or surgical treatment of abdominal aortic aneurysm;

10 410 Peripheral artery disease: history of amputation of (part of) lower limb, lower limb peripheral artery surgery or percutaneous transluminal angioplasty;

11 411 Hypertension: treatment with antihypertensive drugs or blood pressure  $\geq 160/95$  mmHg at baseline measurement;

12 412 Hyperlipidaemia: treatment with lipid-lowering agents, total cholesterol  $\geq 5$  mmol/L or LDL-cholesterol  $\geq 3.2$  mmol/L at baseline measurement;

13 413 Diabetes mellitus: treatment with antidiabetic agents, fasting glucose  $\geq 7.0$  mmol/L or non-fasting glucose  $\geq 11.1$  mmol/L at baseline measurement;

14 414 Renal insufficiency: creatinine  $> 120$  mmol/L and/or microprotein/creatinine ratio in urine  $> 20$ .

15 415 Cut-off values applied at the start of UCC-SMART study, please note target values have changed over time and continuous variable are available.

16  
17  
18 416 cIMT, carotid intima media thickness; CRP, C-reactive protein; CVD, cardiovascular disease; eGFR, estimated glomerular filtration rate; HbA1c, glycosylated haemoglobin

19  
20 417 type A1C; HDL-C, high-density lipoprotein cholesterol; LDL-C, low-density lipoprotein cholesterol; MET, metabolic equivalent of task; TSH: thyroid stimulation hormone.  
21  
22  
23  
24  
25  
26  
27  
28  
29  
30  
31  
32  
33  
34  
35  
36  
37  
38  
39  
40  
41  
42  
43  
44  
45  
46



1  
2  
3 **418 Findings to date**

4  
5 419 The findings of this section are reported for patients included up to January 2020, because the collection  
6  
7 420 and processing of outcome events has been completed up until this date. These patients contributed to a  
8  
9 421 total follow-up time of 134,439 person-years. Median follow-up time was 9.2 years (interquartile range  
10  
11 422 4.8 – 14.1 years). During follow-up, 2,259 (16%) patients suffered from a first combined major  
12  
13 423 cardiovascular endpoint (including non-fatal myocardial infarction, non-fatal stroke or cardiovascular  
14  
15 424 death). Furthermore, there were 943 cases of incident diabetes, 105 cases of end-stage kidney disease,  
16  
17 425 161 cases of heart failure and 434 cases of major bleeding. A total of 3,264 patients underwent a vascular  
18  
19 426 intervention during follow-up. Of patients with previously established CVD, 1906 patients (21%)  
20  
21 427 suffered from the combined vascular endpoint mentioned above as subsequent event, whereas 353  
22  
23 428 patients (7%) with severe risk factors without prior CVD experienced this combined outcome as their  
24  
25 429 first ever event. Of the 2,450 individuals with diabetes at baseline, 568 (23%) individuals suffered from  
26  
27 430 the combined vascular endpoint. Corresponding incidence rates are 21.2 per 1000 person years for  
28  
29 431 patients with established CVD and 8.2 per 1000 person years for patients without a history of CVD.  
30  
31  
32 432 Numbers and observed incidence rates of all specific outcome events of interest are listed in Table 2.  
33  
34 433 Through linkage with the Dutch National Cancer Registry, a total of 2,139 patients were diagnosed with  
35  
36 434 cancer during follow-up. This includes 414 diagnoses of lung cancer, 354 of prostate cancer, 294 of  
37  
38 435 intestinal cancer and 163 of breast cancer as most common diagnoses.  
39

40  
41 436  
42  
43  
44  
45  
46  
47  
48  
49  
50  
51  
52  
53  
54  
55  
56  
57  
58  
59  
60

437 **Table 2. Number and incidence rates of outcome events from 1996 to 2020**

| <b>Outcome event</b>                   | <b>Number of first events</b> | <b>Person-years of follow-up</b> | <b>Incidence rate per 1000 person-years</b> |
|----------------------------------------|-------------------------------|----------------------------------|---------------------------------------------|
| <b>Non-fatal stroke</b>                | 613                           | 131,684                          | 4.66                                        |
| Ischemic stroke                        | 502                           | 132,042                          | 3.80                                        |
| Haemorrhagic infarction                | 20                            | 134,362                          | 0.15                                        |
| Intracerebral haemorrhage              | 66                            | 134,285                          | 0.49                                        |
| Subarachnoid haemorrhage               | 17                            | 134,322                          | 0.13                                        |
| Type not determined                    | 8                             | 134,430                          | 0.06                                        |
| <b>Retinal syndromes</b>               | 16                            | 134,338                          | 0.12                                        |
| Infarction                             | 13                            | 134,353                          | 0.10                                        |
| Haemorrhage                            | 3                             | 134,424                          | 0.02                                        |
| <b>Non-fatal myocardial infarction</b> | 793                           | 130,065                          | 6.10                                        |
| <b>Heart failure</b>                   | 161                           | 134,075                          | 1.20                                        |
| Systolic heart failure, due to         | 115                           | 134,203                          | 0.86                                        |
| coronary disease                       | 85                            | 134,266                          | 0.63                                        |
| valve disorders                        | 11                            | 134,425                          | 0.08                                        |
| other causes                           | 19                            | 134,390                          | 0.14                                        |
| HFpEF, due to                          | 46                            | 134,311                          | 0.34                                        |
| coronary disease                       | 15                            | 134,390                          | 0.11                                        |
| valve disorders                        | 8                             | 134,418                          | 0.06                                        |
| other causes                           | 23                            | 134,381                          | 0.17                                        |
| <b>Non-fatal rupture AAA</b>           | 5                             | 139,895                          | 0.04                                        |
| <b>End-stage kidney disease</b>        | 105                           | 134,118                          | 0.78                                        |
| <b>Vascular intervention</b>           | 3,264                         | 110,154                          | 29.6                                        |
| Heart                                  | 1606                          | 121,936                          | 13.2                                        |
| Carotid or intracranial arteries       | 240                           | 132,611                          | 1.81                                        |
| Aorta                                  | 439                           | 131,553                          | 3.34                                        |
| Peripheral arteries                    | 953                           | 127,914                          | 7.45                                        |
| Renal artery                           | 62                            | 133,970                          | 0.46                                        |
| <b>Major bleeding</b>                  |                               |                                  |                                             |
| ISTH major bleeding                    | 434                           | 129,804                          | 3.34                                        |
| BARC 3 or 5 bleeding                   | 457                           | 132,497                          | 3.45                                        |
| <b>Incident diabetes</b>               | 943                           | 124,310                          | 7.59                                        |
| Type 1 diabetes                        | 1                             | 131,417                          | 0.01                                        |
| Type 2 diabetes                        | 942                           | 124,330                          | 7.58                                        |

|                                    |       |         |       |
|------------------------------------|-------|---------|-------|
| <b>Vascular mortality</b>          | 1,267 | 134,439 | 9.42  |
| Fatal cerebral infarction          | 85    |         | 0.63  |
| Fatal cerebral haemorrhage         | 65    |         | 0.48  |
| Fatal stroke – type not determined | 21    |         | 0.16  |
| Fatal myocardial infarction        |       |         |       |
| Fatal heart failure                | 63    |         | 0.47  |
| Fatal rupture AAA                  | 198   |         | 1.47  |
| Sudden death                       | 29    |         | 0.22  |
| Other                              | 401   |         | 2.98  |
|                                    | 405   |         | 3.01  |
| <b>Non-vascular mortality</b>      | 1317  | 134,439 | 9.80  |
| Fatal malignancy                   | 800   |         | 5.95  |
| Fatal infection                    | 169   |         | 1.26  |
| Unnatural death                    | 58    |         | 0.43  |
| Other                              | 290   |         | 2.16  |
| <b>All-cause mortality</b>         | 2,794 | 134,439 | 20.78 |
| <b>Malignancy<sup>a</sup></b>      | 2,139 | 127,514 | 16.77 |
| Lung                               | 414   |         | 3.25  |
| Prostate                           | 354   |         | 2.78  |
| Breast                             | 163   |         | 1.28  |
| Intestinal                         | 294   |         | 2.31  |
| Other                              | 914   |         | 7.17  |

<sup>a</sup> Other subtypes of cancer in the dataset include cancer of the lip, oral cavity or pharynx; oesophagus; stomach; liver, intrahepatic bile ducts, or gallbladder; pancreas; respiratory tract; thymus; bone or articular cartilage of limb; melanoma; mesothelial or soft tissue; vulva or vagina; cervix uteri or corpus uteri; ovary; penis or testes; kidney, renal pelvis or ureter; bladder; eye, brain, and other parts of the central nervous system; thyroid gland; lymphatic/hematopoietic.

AAA, abdominal aortic aneurysm; BARC, Bleeding Academic Research Consortium; HFpEF, heart failure with preserved ejection fraction; ISTH, International Society on Thrombosis and Haemostasis.

1  
2  
3 446 The large database of observational data is used for over 350 etiological and prognostic studies  
4  
5 447 so far, and the coverage of a wide age range and long follow-up provides opportunity to develop and  
6  
7 448 validate prediction models. This has been done with the SMART risk score[35,36], the SMART-  
8  
9 449 REACH lifetime model for patients with previous CVD[3] and the DIAL lifetime model[37] for patients  
10  
11 450 with type 2 diabetes (to be found at <https://u-prevent.com> and the ESC ‘CVD risk calculation’-app).  
12  
13 451 These estimates serve clinical practice by providing insight into risk and thus supporting patient  
14  
15 452 education and shared decision making. Moreover, routinely collection of patient data allows for  
16  
17 453 embedding clinical trials within the cohort, as has been done with, amongst others, TEMPUS[30] and  
18  
19 454 SMART-Inform[31].

20  
21  
22 455 The vascular screening in the UCC-SMART study is a structured uniform program to detect risk  
23  
24 456 factors and asymptomatic atherosclerosis and provides a basis for optimizing treatment of high-risk  
25  
26 457 patients. In a previous study comparing the UCC-SMART screening program to usual care in another  
27  
28 458 university hospital in the Netherlands, a beneficial effect of the screening program on SBP and LDL-C  
29  
30 459 was seen.[29] Previous research on screening programs in the general population shows improvement  
31  
32 460 of cardiovascular risk factors and detection of patients at risk, but conflicting results are found on  
33  
34 461 mortality and cardiovascular events.[2,38] In a population at risk (e.g. with hypertension or diabetes)  
35  
36 462 the beneficial effect of cardiovascular screening is more clearly pronounced.[2,39] In addition, a higher  
37  
38 463 baseline achievement of secondary prevention targets is associated with improved cardiovascular health  
39  
40 464 outcomes in an patients with established CVD and type 2 diabetes.[40]

41  
42  
43 465

#### 44 466 **Strengths and limitations**

45  
46  
47 467 The UCC-SMART study is a unique ongoing prospective cohort study in more than 14,000 patients  
48  
49 468 with a history of various manifestations of CVD or severe cardiovascular risk factors, providing a large  
50  
51 469 database of information on a population at high cardiovascular risk. Collecting diverse outcome events  
52  
53 470 in this population allows for research on risk factors for different manifestations of CVD and incident  
54  
55 471 diabetes. Linkage to multiple registries facilitates the investigation of relationships between  
56  
57 472 cardiovascular risk factors and diseases and other conditions such as cancer and dementia.  
58  
59  
60

1  
2  
3 473 By the integration of health care and scientific research, patient care becomes more complete  
4  
5 474 and data already to be collected for patient care is used to increase knowledge of CVD, whilst the  
6  
7 475 additive burden for participating patients is limited.

9 476 The main strengths of the UCC-SMART cohort include the large size, its capture of a high-risk  
10  
11 477 population with various CVD manifestations and risk factors with few exclusion criteria, the use of a  
12  
13 478 standardized diagnostic protocol, the long follow-up duration and the comprehensive prospective  
14  
15 479 capture of a wide range of data. Because inclusion of patients is still ongoing, the UCC-SMART cohort  
16  
17 480 provides a good representation of the past and current population of patients at high cardiovascular risk.  
18  
19 481 Due to the high risk study population, the prevalence and incidence of the main outcome variables are  
20  
21 482 higher than in the general population, thereby increasing the power to study these outcomes.  
22  
23 483 Furthermore, all outcome events are adjudicated independently by three physicians of the endpoint  
24  
25 484 committee, reducing the risk of misclassification. The proportion of missing data is small, possibly  
26  
27 485 explained by the protocolized screening program taking place in one day. The substudies provide  
28  
29 486 additional information on specific cardiovascular risk factors (e.g. parental history of CVD[41],  
30  
31 487 characteristics related to left ventricle hypertrophy[24], and the presence of diffuse idiopathic skeletal  
32  
33 488 hyperostosis[42]), manifestations of atherosclerosis (e.g. brain changes on MRI[18] and cognitive  
34  
35 489 decline[19]), and other important aspects in cardiovascular risk management (e.g. the effect of a  
36  
37 490 cardiovascular polypill[43]).

41 491 Limitations also need to be considered. Due to the prospective observational design, for the  
42  
43 492 majority of the patients, risk factors are only measured at baseline and may have changed during follow-  
44  
45 493 up. This could be reflected by the finding of this article that not all patients with CVD meet treatment  
46  
47 494 goals for modifiable risk factors at baseline. Since patients are included several weeks to months after  
48  
49 495 an index CVD event, risk factors are likely to be further optimized during this period after baseline  
50  
51 496 examination. For a subset of patients with CVD or diabetes, a repeat of the baseline measurements after  
52  
53 497 a median of 9.9 years is indeed available, allowing for investigating the course of atherosclerosis over  
54  
55 498 time. Furthermore, ten percent of the included patients is lost to follow-up. Yet, the median time to loss  
56  
57 499 to follow-up is 7.4 years, so those patients still contribute to a fair amount of patient-years. In addition,  
58  
59 500 because UCC-SMART is a single-centre study in a university hospital, it can be disputed whether it

1  
2  
3 501 represents the general high risk population and patients with established CVD. The UMC Utrecht  
4  
5 502 provides care to nationwide patients referred for complex and specialized care, but also to patients  
6  
7 503 referred by general practitioners from the region. Moreover, the UCC-SMART study does not include  
8  
9 504 patients requiring highly specialized care (including heart transplantation and rare causes of vascular  
10  
11 505 disease). Lastly, except for information on education level, the database does not contain extensive  
12  
13 506 information on socioeconomic status.

15 507 In conclusion, we have provided an updated extensive overview of the design of the UCC-  
16  
17 508 SMART study as well as an overview of the findings to date. A future goal is to make the UCC-SMART  
18  
19 509 data Findable, Accessible, Interoperable and Reusable (FAIR).[44]  
20

21  
22 510

### 23 24 511 **Collaboration**

25  
26  
27 512 The UCC-SMART study group directs the academic focus of research using the UCC-SMART data and  
28  
29 513 consists of members from both epidemiological and clinical cardiovascular research. Datasets are  
30  
31 514 provided to interested researchers after approval of request by the UCC-SMART study group. Access  
32  
33 515 to the data request module can be applied for via [ucc-smart@umcutrecht.nl](mailto:ucc-smart@umcutrecht.nl).

34  
35  
36 516

37  
38 517  
39  
40  
41  
42  
43  
44  
45  
46  
47  
48  
49  
50  
51  
52  
53  
54  
55  
56  
57  
58  
59  
60

1  
2  
3 518 **Conflict of interest**  
4

5  
6 519 The authors declare no conflict of interest.  
7

8  
9 520

10  
11 521 **Financial support**  
12

13  
14 522 The UCC-SMART study was financially supported by the UMC Utrecht, the Netherlands. The  
15  
16 523 supporting sources had no involvement in study design, analysis, interpretation, writing of the results,  
17  
18 524 or the decision to submit for publication.  
19

20  
21 525

22  
23  
24 526 **Author contributions**  
25

26  
27 527 F.L.J.V., S.H.J.H., J.W., M.C.C. and M.A.G.H. contributed to the conception and design of the work.  
28

29 528 All authors contributed to the analysis or interpretation of data for the work. M.A.G.H. and M.C.C.

30  
31 529 drafted the manuscript. All authors critically revised the manuscript. All gave final approval and agreed

32  
33 530 to be accountable for all aspects of work ensuring integrity and accuracy.  
34

35  
36 531

37  
38 532 **Acknowledgements**  
39

40  
41 533 We gratefully acknowledge the contribution of the participants, the research nurses, R. van Petersen

42  
43 534 (data-manager), A. Vandersteen (study manager), the founders of the SMART-study in 1996: A. Algra,

44  
45 535 J.D. Banga, B.C. Eikelboom and Y. van der Graaf, and the members of the UCC-SMART Studygroup:

46  
47 536 F.W. Asselbergs, M.J. Cramer and H.M. Nathoe, Department of Cardiology; G.J. de Borst, Department

48  
49 537 of Vascular Surgery; M.L. Bots and M.I. Geerlings, Julius Centre for Health Sciences and Primary Care;

50  
51 538 M.H. Emmelot-Vonk, Department of Geriatrics; P.A. de Jong, Department of Radiology; A.T. Lely,

52  
53 539 Department of Gynaecology and Obstetrics; N.P. van der Kaaij, Department of Cardiothoracic Surgery;

54  
55 540 L.J. Kappelle and Y.M. Ruigrok, Department of Neurology; M.C. Verhaar, Department of Nephrology

56  
57 541 & Hypertension; F.L.J. Visseren (chair), Department of Vascular Medicine, UMC Utrecht.  
58  
59  
60

542 **References**

- 543 [1] Roth GA, Mensah GA, Johnson CO, Addolorato G, Ammirati E, Baddour LM, et al. Global  
544 Burden of Cardiovascular Diseases and Risk Factors, 1990-2019: Update From the GBD 2019  
545 Study. *J Am Coll Cardiol.* 2020;76(25):2982–3021.
- 546 [2] Visseren FLJ, Mach F, Smulders YM, Carballo D, Koskinas KC, Bäck M, et al. 2021 ESC  
547 Guidelines on cardiovascular disease prevention in clinical practice. *Eur J Prev Cardiol.*  
548 2022;29(1):5–115.
- 549 [3] Kaasenbrood L, Bhatt DL, Dorresteijn JAN, Wilson PWF, D’Agostino RB, Massaro JM, et al.  
550 Estimated life expectancy without recurrent cardiovascular events in patients with vascular  
551 disease: The SMART-REACH model. *J Am Heart Assoc.* 2018;7(16).
- 552 [4] Adler A, Agodoa L, Algra A, Asselbergs FW, Beckett NS, Berge E, et al. Pharmacological  
553 blood pressure lowering for primary and secondary prevention of cardiovascular disease across  
554 different levels of blood pressure: an individual participant-level data meta-analysis. *Lancet.*  
555 2021;397(10285):1625–36.
- 556 [5] Collins R, Reith C, Emberson J, Armitage J, Baigent C, Blackwell L, et al. Interpretation of the  
557 evidence for the efficacy and safety of statin therapy. *Lancet.* 2016;388(10059):2532–61.
- 558 [6] Simons PCG, Algra A, Van De Laak MF, Grobbee DE, Van Der Graaf Y. Second  
559 manifestations of ARterial disease (SMART) study: Rationale and design. *Eur J Epidemiol.*  
560 1999;15(9):773–81.
- 561 [7] Rose GA, Blackburn H. Cardiovascular survey methods. *Monogr Ser World Health Organ.*  
562 1968;56:1–188.
- 563 [8] Tremblay AJ, Morrissette H, Gagné JM, Bergeron J, Gagné C, Couture P. Validation of the  
564 Friedewald formula for the determination of low-density lipoprotein cholesterol compared with  
565  $\beta$ -quantification in a large population. *Clin Biochem.* 2004;37(9):785–90.
- 566 [9] Levey AS, Stevens LA, Schmid CH, Zhang Y, Castro AF, Feldman HI, et al. A new equation  
567 to estimate glomerular filtration rate. *Ann Intern Med.* 2009;150(9):604–12.
- 568 [10] Lang RM, Badano LP, Mor-Avi V, Afilalo J, Armstrong A, Ernande L, et al.  
569 Recommendations for cardiac chamber quantification by echocardiography in adults: an



- 1  
2  
3 570 update from the American Society of Echocardiography and the European Association of  
4  
5 571 Cardiovascular Imaging. *J Am Soc Echocardiogr Off Publ Am Soc Echocardiogr*. 2015  
6  
7 572 Jan;28(1):1-39.e14.
- 8  
9 573 [11] Devereux RB, Alonso DR, Lutas EM, Gottlieb GJ, Campo E, Sachs I, et al. Echocardiographic  
10  
11 574 assessment of left ventricular hypertrophy: comparison to necropsy findings. *Am J Cardiol*.  
12  
13 575 1986 Feb;57(6):450–8.
- 14  
15 576 [12] Nagueh SF, Smiseth OA, Appleton CP, Byrd BF 3rd, Dokainish H, Edvardsen T, et al.  
16  
17 577 Recommendations for the Evaluation of Left Ventricular Diastolic Function by  
18  
19 578 Echocardiography: An Update from the American Society of Echocardiography and the  
20  
21 579 European Association of Cardiovascular Imaging. *J Am Soc Echocardiogr Off Publ Am Soc*  
22  
23 580 *Echocardiogr*. 2016 Apr;29(4):277–314.
- 24  
25 581 [13] Koene RJ, Prizment AE, Blaes A, Konety SH. Shared risk factors in cardiovascular disease and  
26  
27 582 cancer. *Circulation*. 2016;133(11):1104–14.
- 28  
29 583 [14] ten Berg MJ, Huisman A, van den Bemt PMLA, Schobben AFAM, Egberts ACG, van Solinge  
30  
31 584 WW. Linking laboratory and medication data: new opportunities for pharmacoepidemiological  
32  
33 585 research. *Clin Chem Lab Med*. 2007;45(1):13–9.
- 34  
35 586 [15] Patel RS, Asselbergs FW. The GENIUS-CHD consortium. *Eur Heart J*. 2015 Oct;36(40):2674–  
36  
37 587 6.
- 38  
39 588 [16] Matsushita K, Ballew SH, Astor BC, Jong PE de, Gansevoort RT, Hemmelgarn BR, et al.  
40  
41 589 Cohort profile: the chronic kidney disease prognosis consortium. *Int J Epidemiol*. 2013  
42  
43 590 Dec;42(6):1660–8.
- 44  
45 591 [17] Franssens BT, Nathoe HM, Leiner T, Van Der Graaf Y, Visseren FLJ. Relation between  
46  
47 592 cardiovascular disease risk factors and epicardial adipose tissue density on cardiac computed  
48  
49 593 tomography in patients at high risk of cardiovascular events. *Eur J Prev Cardiol*.  
50  
51 594 2017;24(6):660–70.
- 52  
53 595 [18] Geerlings MI, Appelman APA, Vincken KL, Algra A, Witkamp TD, Mali WPTM, et al. Brain  
54  
55 596 volumes and cerebrovascular lesions on MRI in patients with atherosclerotic disease. The  
56  
57 597 SMART-MR study. *Atherosclerosis*. 2010;210(1):130–6.

- 1  
2  
3 598 [19] Grool AM, Van Der Graaf Y, Mali WPTM, Geerlings MI. Location of cerebrovascular and  
4  
5 599 degenerative changes, depressive symptoms and cognitive functioning in later life: The  
6  
7 600 SMART-Medea study. *J Neurol Neurosurg Psychiatry*. 2011;82(10):1093–100.
- 9 601 [20] Verhoeven BAN, Velema E, Schoneveld AH, de Vries JPPM, de Bruin P, Seldenrijk CA, et al.  
10  
11 602 Athero-express: differential atherosclerotic plaque expression of mRNA and protein in relation  
12  
13 603 to cardiovascular events and patient characteristics. Rationale and design. *Eur J Epidemiol*.  
14  
15 604 2004;19(12):1127–33.
- 17 605 [21] Weijmans M, Van Der Graaf Y, De Borst GJ, Asselbergs FW, Cramer MJ, Algra A, et al.  
18  
19 606 Prevalence and risk of cardiovascular risk factors and events in offspring of patients at high  
20  
21 607 vascular risk and effect of location of parental vascular disease. *Int J Cardiol*. 2015;195:195–  
22  
23 608 202.
- 25 609 [22] Harlianto NI, Oosterhof N, Foppen W, Hol ME, Wittenberg R, van der Veen PH, et al. Diffuse  
26  
27 610 idiopathic skeletal hyperostosis is associated with incident stroke in patients with increased  
28  
29 611 cardiovascular risk. *Rheumatology*. 2021;1–8.
- 31 612 [23] Resnick D, Niwayama G. Radiographic and pathologic features of spinal involvement in  
32  
33 613 diffuse idiopathic skeletal hyperostosis (DISH). *Radiology*. 1976 Jun;119(3):559–68.
- 35 614 [24] Meijls MFL, Bots ML, Vonken EJA, Cramer MJM, Melman PG, Velthuis BK, et al. Rationale  
36  
37 615 and design of the SMART Heart study. *Netherlands Hear J*. 2007;15(9):295–8.
- 39 616 [25] Zwakenberg SR, De Jong PA, Hendriks EJ, Westerink J, Spiering W, De Borst GJ, et al.  
40  
41 617 Intimal and medial calcification in relation to cardiovascular risk factors. *PLoS One*. 2020;15(7  
42  
43 618 July):1–14.
- 45 619 [26] Schlösser FJV, Tangelder MJD, Verhagen HJM, van der Heijden GJMG, Muhs BE, van der  
46  
47 620 Graaf Y, et al. Growth predictors and prognosis of small abdominal aortic aneurysms. *J Vasc*  
48  
49 621 *Surg*. 2008;47(6):1127–33.
- 51 622 [27] Franssens BT, Eikendal AL, Leiner T, van der Graaf Y, Visseren FLJ, Hoogduin JM.  
52  
53 623 Reliability and agreement of adipose tissue fat fraction measurements with water-fat MRI in  
54  
55 624 patients with manifest cardiovascular disease. *NMR Biomed*. 2016;29(1):48–56.
- 57 625 [28] Goessens BMB, Visseren FLJ, de Nooijer J, van den Borne HW, Algra A, Wierdsma J, et al. A

- 1  
2  
3 626 pilot-study to identify the feasibility of an Internet-based coaching programme for changing the  
4  
5 627 vascular risk profile of high-risk patients. *Patient Educ Couns*. 2008;73(1):67–72.  
6  
7 628 [29] Brouwer BG, Visseren FLJ, Algra A, Van Bockel JH, Bollen ELEM, Doevendans PA, et al.  
8  
9 629 Effectiveness of a hospital-based vascular screening programme (SMART) for risk factor  
10  
11 630 management in patients with established vascular disease or type 2 diabetes: A parallel-group  
12  
13 631 comparative study. *J Intern Med*. 2010;268(1):83–93.  
14  
15 632 [30] Lafeber M, Grobbee DE, Bots ML, Thom S, Webster R, Rodgers A, et al. The Evening versus  
16  
17 633 Morning Polypill Utilization Study: The TEMPUS rationale and design. *Eur J Prev Cardiol*.  
18  
19 634 2014;21(4):425–33.  
20  
21 635 [31] Jaspers NEM, Visseren FLJ, Van Der Graaf Y, Smulders YM, Damman OC, Brouwers C, et al.  
22  
23 636 Communicating personalised statin therapy-effects as 10-year CVD-risk or CVD-free life-  
24  
25 637 expectancy: Does it improve decisional conflict? Three-armed, blinded, randomised controlled  
26  
27 638 trial. *BMJ Open*. 2021;11(7):1–8.  
28  
29 639 [32] Brouwer BG. SMART risk factor screening in patients at high vascular risk [dissertation].  
30  
31 640 Utrecht University; 2008.  
32  
33 641 [33] Goessens BMB, Visseren FLJ, Sol BGM, de Man-Van Ginkel JM, Van Der Graaf Y. A  
34  
35 642 randomized, controlled trial for risk factor reduction in patients with symptomatic vascular  
36  
37 643 disease: The multidisciplinary Vascular Prevention by Nurses Study (VENUS). *Eur J Prev*  
38  
39 644 *Cardiol*. 2006;13(6):996–1003.  
40  
41 645 [34] Vernooij WP, Kaasjager HAH, Van Der Graaf Y, Wierdsma J, Grandjean HMH, Hovens  
42  
43 646 MMC, et al. Internet based vascular risk factor management for patients with clinically  
44  
45 647 manifest vascular disease: Randomised controlled trial. *BMJ*. 2012;344(7863):1–13.  
46  
47 648 [35] Dorresteijn JAN, Visseren FLJ, Wassink AMJ, Gondrie MJA, Steyerberg EW, Ridker PM, et  
48  
49 649 al. Development and validation of a prediction rule for recurrent vascular events based on a  
50  
51 650 cohort study of patients with arterial disease: The SMART risk score. *Heart*. 2013;99(12):866–  
52  
53 651 72.  
54  
55 652 [36] Hageman SHJ, McKay AJ, Ueda P, Gunn LH, Jernberg T, Hagström E, et al. Estimation of  
56  
57 653 recurrent atherosclerotic cardiovascular event risk in patients with established cardiovascular

- 1  
2  
3 654 disease: the updated SMART2 algorithm. *Eur Heart J.* 2022;  
4  
5 655 [37] Berkelmans GFN, Gudbjörnsdóttir S, Visseren FLJ, Wild SH, Franzen S, Chalmers J, et al.  
6  
7 656 Prediction of individual life-years gained without cardiovascular events from lipid, blood  
8  
9 657 pressure, glucose, and aspirin treatment based on data of more than 500 000 patients with Type  
10  
11 658 2 diabetes mellitus. *Eur Heart J.* 2019;40(34):2899–906.  
12  
13 659 [38] Cho JH, Han KD, Jung H-Y, Bond A. National health screening may reduce cardiovascular  
14  
15 660 morbidity and mortality among the elderly. *Public Health.* 2020 Oct;187:172–6.  
16  
17 661 [39] Antoku Y, Takemoto M, Mito T, Shiiyama R, Otsuka-Morisaki H, Tanaka A, et al. Impact of  
18  
19 662 Annual Cardiovascular Screening Tests in Patients with Type 2 Diabetes Mellitus without  
20  
21 663 Previous Histories of Cardiovascular Disease: Four-year Clinical Outcomes. *Intern Med.* 2021  
22  
23 664 Sep;60(17):2725–32.  
24  
25 665 [40] Pagidipati NJ, Navar AM, Pieper KS, Green JB, Bethel MA, Armstrong PW, et al. Secondary  
26  
27 666 Prevention of Cardiovascular Disease in Patients With Type 2 Diabetes Mellitus. *Circulation.*  
28  
29 667 2017 Sep 26;136(13):1193–203.  
30  
31 668 [41] Weijmans M, van der Graaf Y, de Borst GJ, Nathoe HM, Algra A, Visseren FLJ, et al. Parental  
32  
33 669 history and the risk of subsequent vascular events in patients with clinically manifest vascular  
34  
35 670 disease: The effects of sex of the parent and vascular disease location. *Atherosclerosis.*  
36  
37 671 2014;234(1):129–35.  
38  
39 672 [42] Harlianto NI, Westerink J, Foppen W, Hol ME, Wittenberg R, Van Der Veen PH, et al.  
40  
41 673 Visceral adipose tissue and different measures of adiposity in different severities of diffuse  
42  
43 674 idiopathic skeletal hyperostosis. *J Pers Med.* 2021;11(7):1–11.  
44  
45 675 [43] Lafeber M, Grobbee DE, Schrover IM, Thom S, Webster R, Rodgers A, et al. Comparison of a  
46  
47 676 morning polypill, evening polypill and individual pills on LDL-cholesterol, ambulatory blood  
48  
49 677 pressure and adherence in high-risk patients; A randomized crossover trial. *Int J Cardiol.*  
50  
51 678 2015;181:193–9.  
52  
53 679 [44] Wilkinson MD, Dumontier M, Aalbersberg IJ, Appleton G, Axton M, Baak A, et al. The FAIR  
54  
55 680 Guiding Principles for scientific data management and stewardship. *Sci Data.*  
56  
57 681 2016;3(1):160018.  
58  
59  
60

1  
2 **Figure legends**  
3

4 **Figure 1. Course of the UCC-SMART study**  
5

6  
7 ECG, electrocardiogram; UCC-SMART, Utrecht Cardiovascular Cohort – Second Manifestations of  
8 Arterial Disease; UMC Utrecht, University Medical Centre Utrecht  
9  
10  
11  
12  
13  
14

15 **Figure 2. Timeline of measurements collected for or starting from a certain period**  
16

17  
18 ACE, angiotensin converting enzyme; apoB, apolipoprotein B; CAC, coronary artery calcium; CRP,  
19 C-reactive protein; CT, computerized tomography; CV, cardiovascular; CVD, cardiovascular disease;  
20 HbA1c, glycated haemoglobin; Lp(a), lipoprotein a; MRI, magnetic resonance imaging; T, Tesla;  
21  
22  
23  
24 TSH, thyroid stimulating hormone  
25  
26  
27  
28  
29

30 **Figure 3. Cumulative number of patients over time**  
31

32 Inclusion in the UCC-SMART study started in September 1996.  
33  
34  
35  
36  
37

38 **Figure 4. Distribution of inclusion diagnoses**  
39

40 CVD, cardiovascular disease; HIV, human immunodeficiency virus  
41  
42  
43  
44  
45  
46  
47  
48  
49  
50  
51  
52  
53  
54  
55  
56  
57  
58  
59  
60

1  
2  
3  
4  
5  
6  
7  
8  
9  
10  
11  
12  
13  
14  
15  
16  
17  
18  
19  
20  
21  
22  
23  
24  
25  
26

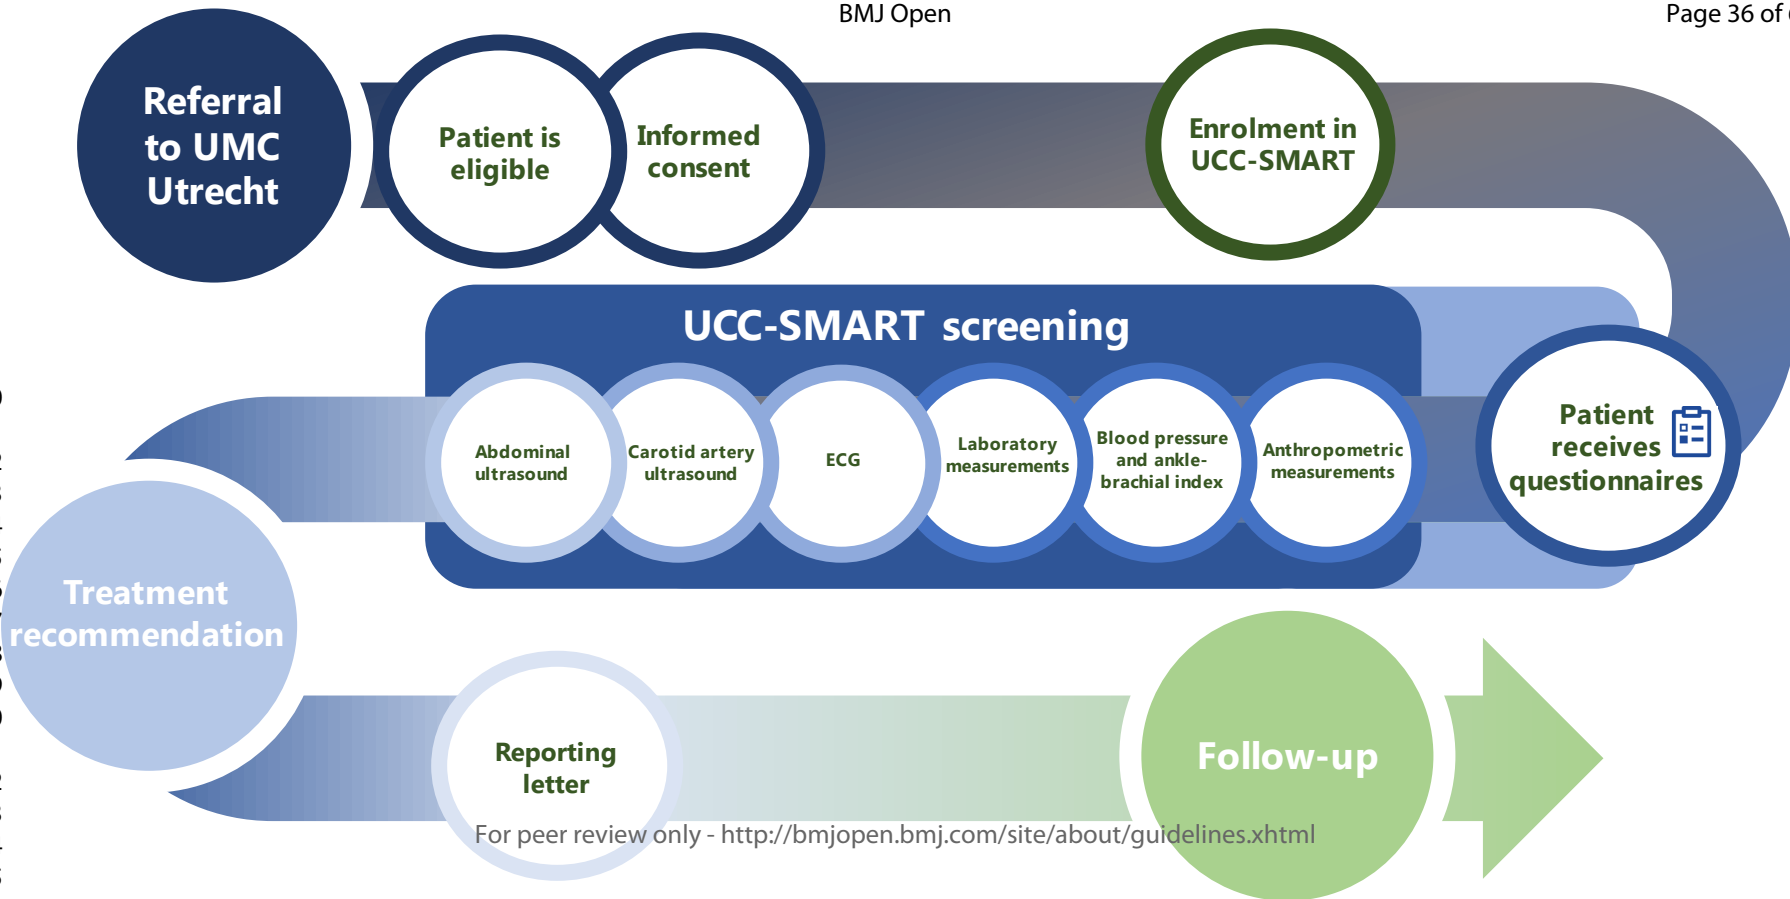

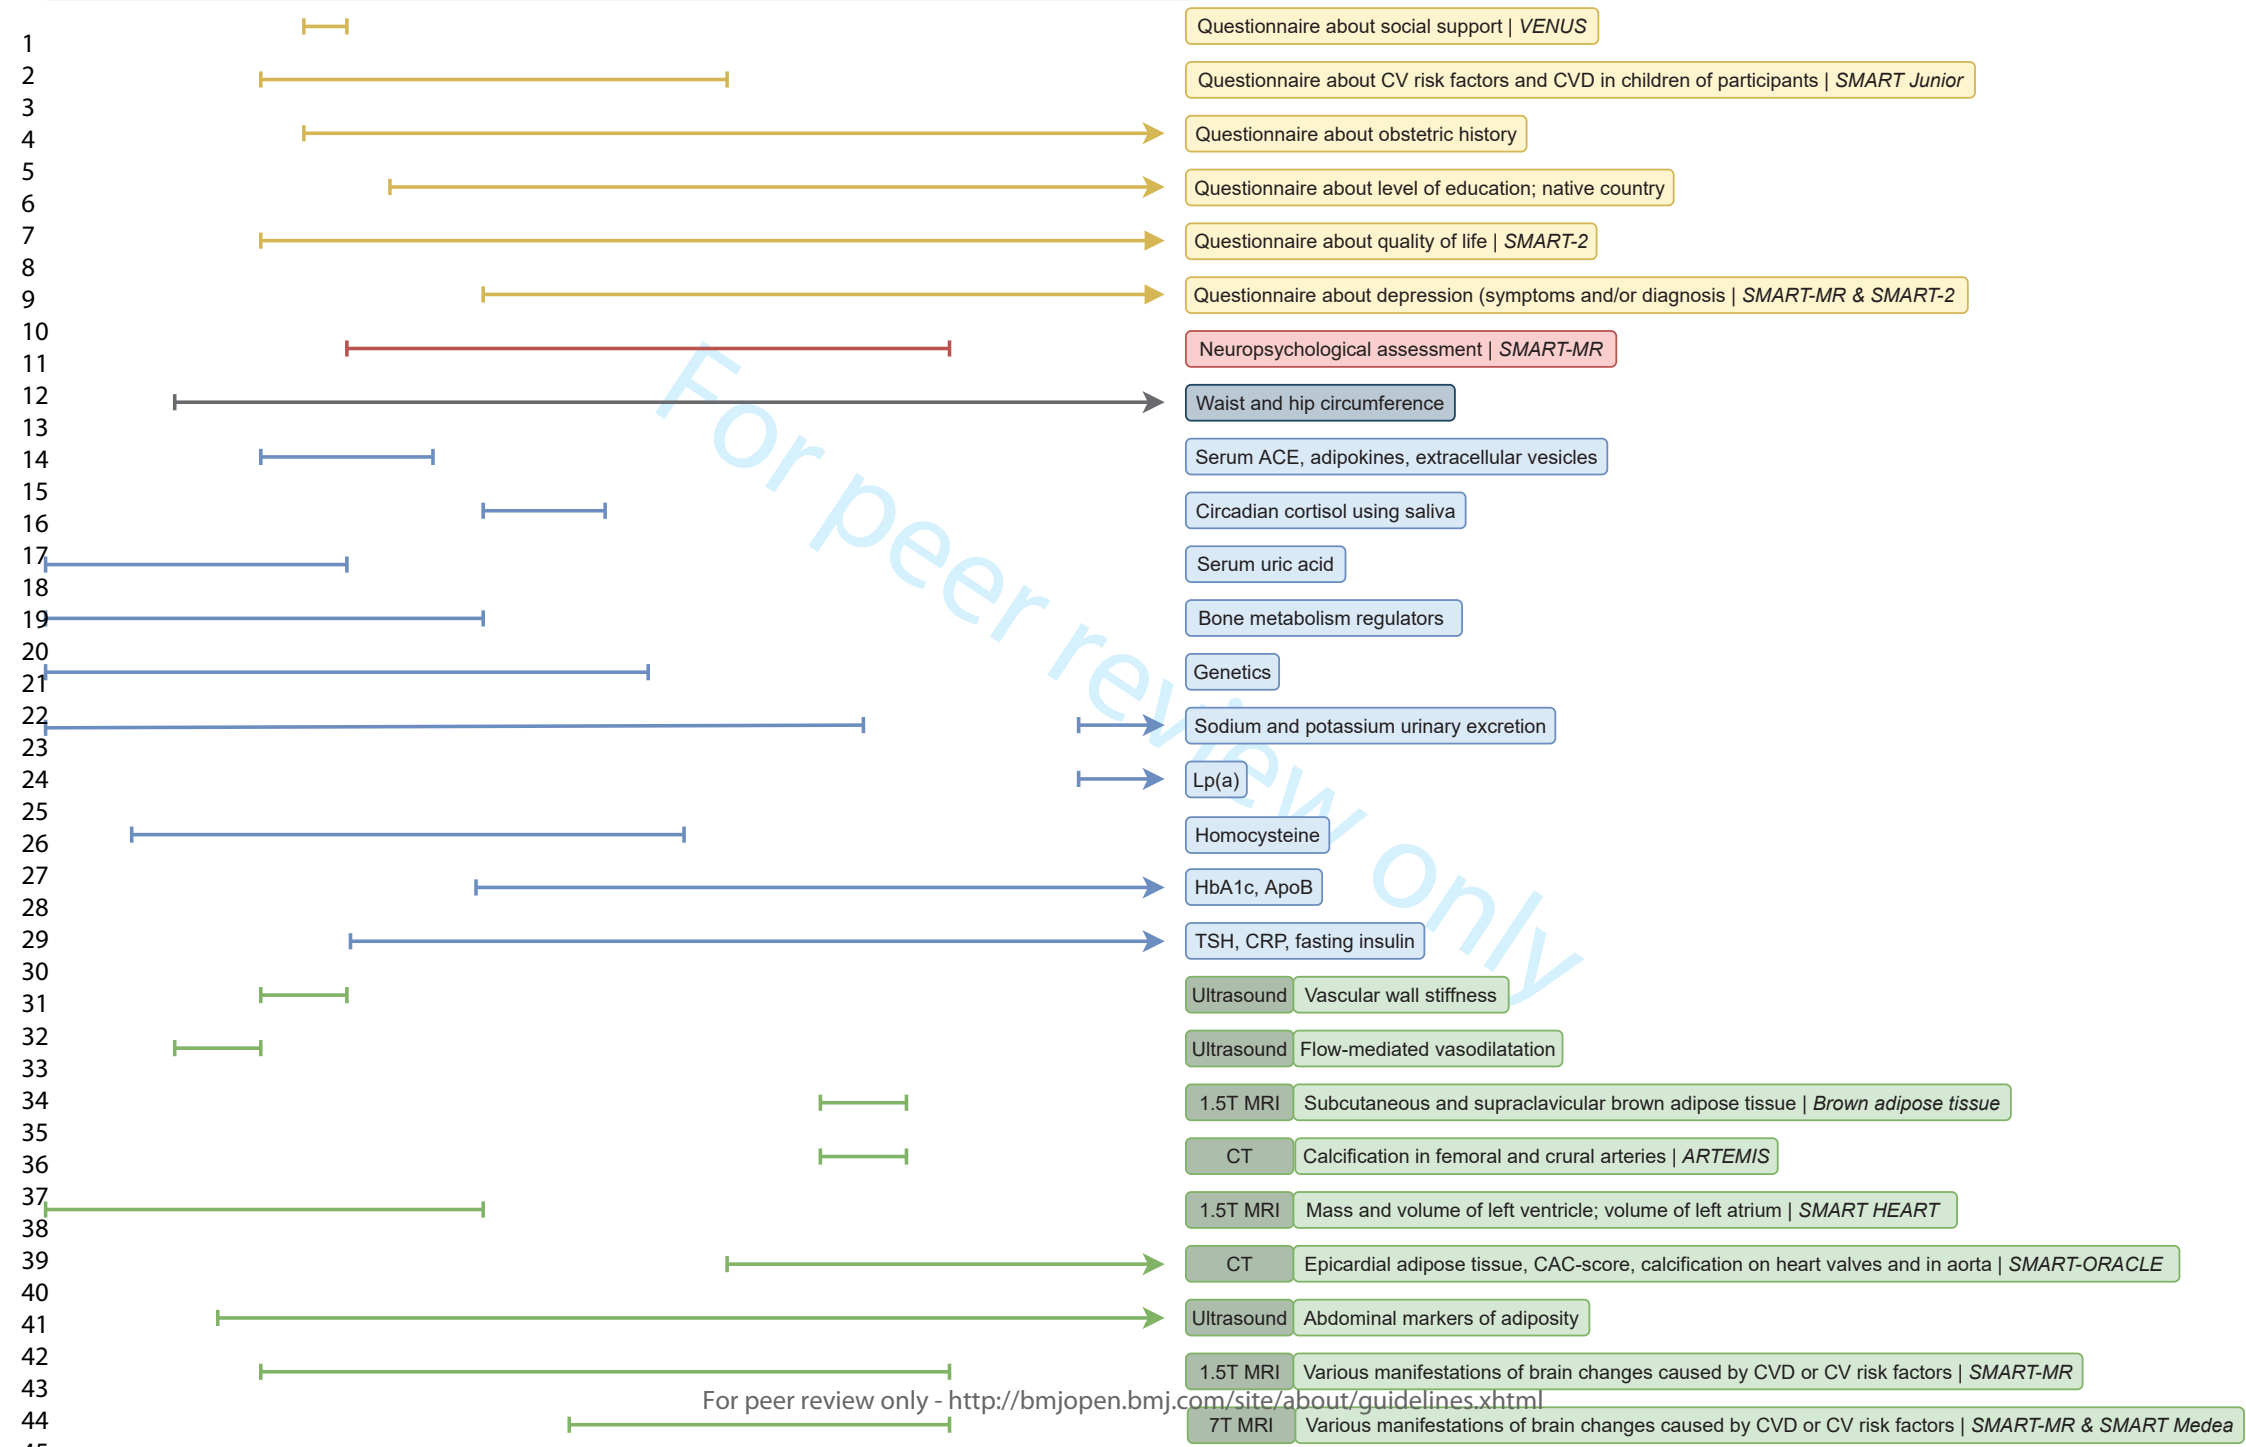

1  
2  
3  
4  
5  
6  
7  
8  
9  
10  
11  
12  
13  
14  
15  
16  
17  
18  
19  
20  
21  
22  
23  
24  
25

— Inclusions  
— Deaths  
— Lost to follow-up

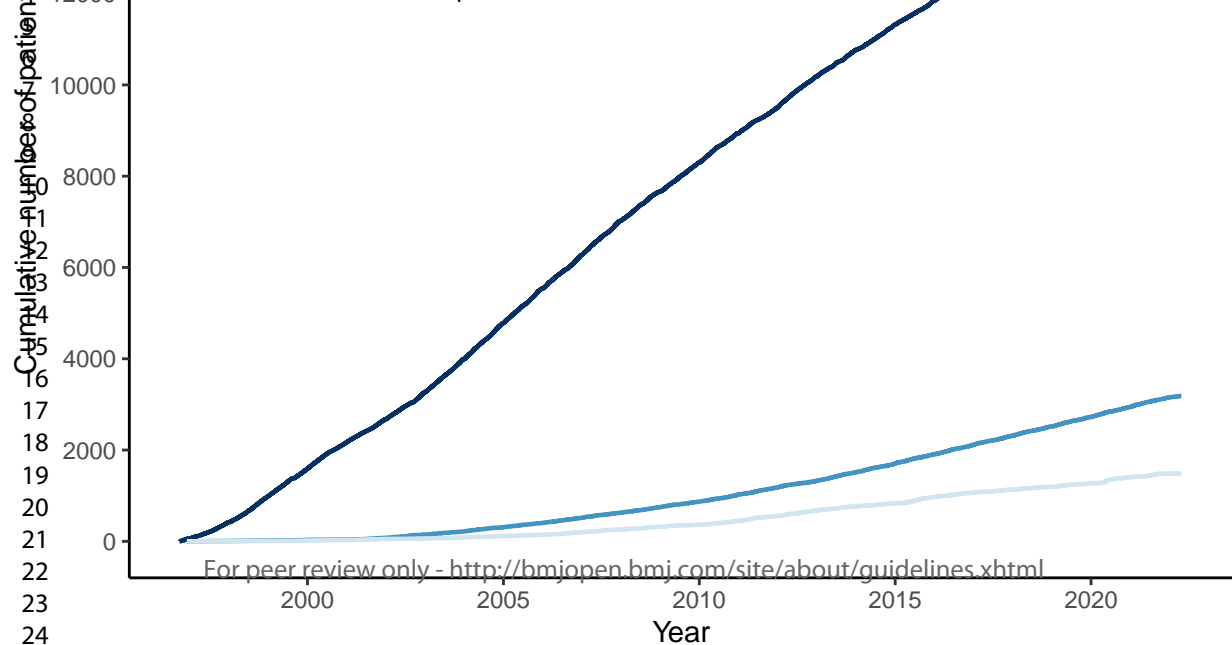



Total (n = 14,830)

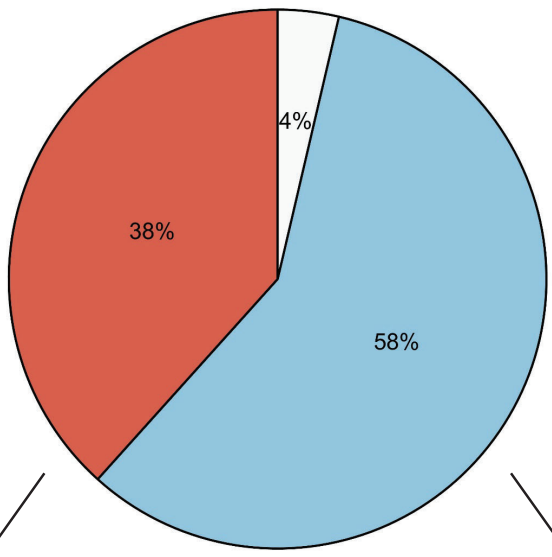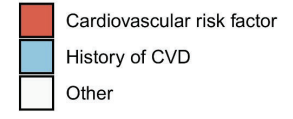

Cardiovascular risk factor (n = 5,684)

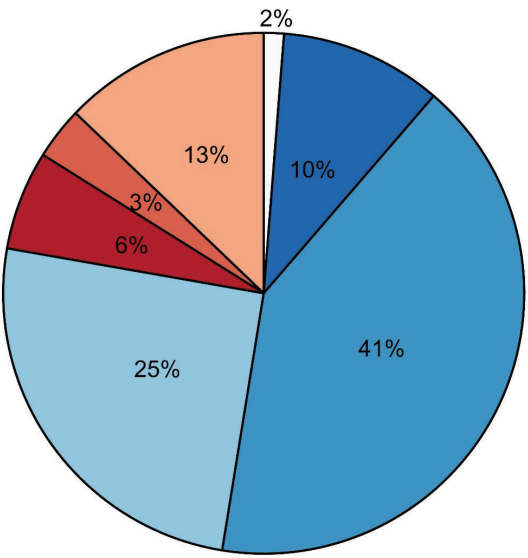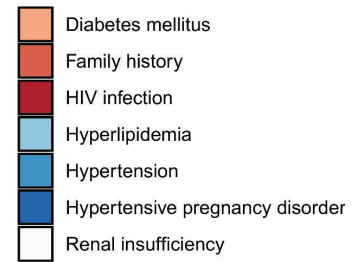

History of CVD (n = 8,603)

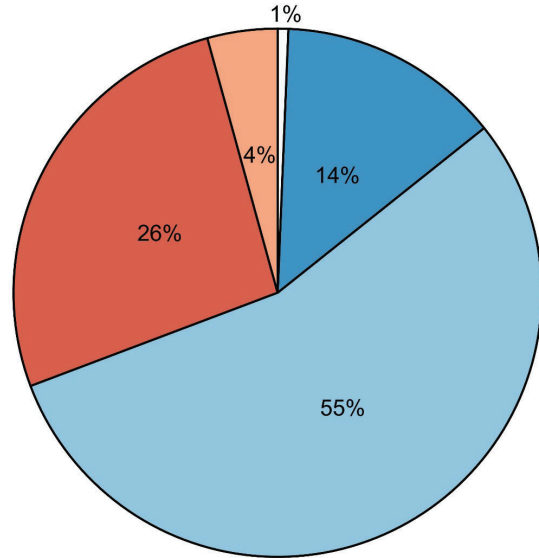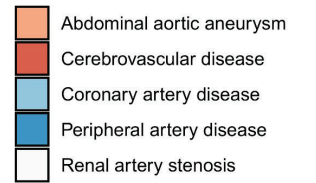

1  
2  
3  
4  
5  
6  
7  
8  
9  
10  
11  
12  
13  
14  
15  
16  
17  
18  
19  
20  
21  
22  
23  
24  
25  
26  
27  
28  
29  
30  
31  
32  
33  
34  
35  
36  
37  
38  
39  
40  
41  
42  
43  
44  
45  
46

1  
2  
3  
4  
5  
6  
7  
8  
9  
10  
11  
12  
13  
14  
15  
16  
17  
18  
19  
20  
21  
22  
23  
24  
25  
26  
27  
28  
29  
30  
31  
32  
33  
34  
35  
36  
37  
38  
39  
40  
41  
42  
43  
44  
45  
46  
47  
48  
49  
50  
51  
52  
53  
54  
55  
56  
57  
58  
59  
60

## Supplementary material

**Cohort profile: the Utrecht Cardiovascular Cohort – Second Manifestations of Arterial Disease (UCC-SMART) study – an ongoing prospective cohort study of patients at high cardiovascular risk in The Netherlands**

For peer review only

**Content list**

Supplementary Table 1. Inclusion criteria and exclusion criteria..... 3

Supplementary Table 2. Variables available in UCC-SMART..... 5

Supplementary Table 3. Measurements that have been performed in the past ..... 7

Supplementary Table 4. Definitions of established cardiovascular disease..... 8

Supplementary Table 5. Definitions of outcome events..... 9

Supplementary Table 5. Substudies of UCC-SMART.....12

Supplemental Figure 1. Timeline of substudies of UCC-SMART.....19

References.....20

For peer review only

**Supplementary Table 1. Inclusion criteria and exclusion criteria**

| Inclusion criteria                                                    | Definition                                                                                                                                                                                                                                                                                                                                                           |
|-----------------------------------------------------------------------|----------------------------------------------------------------------------------------------------------------------------------------------------------------------------------------------------------------------------------------------------------------------------------------------------------------------------------------------------------------------|
| One or more of the following cardiovascular diseases or risk factors: |                                                                                                                                                                                                                                                                                                                                                                      |
| Cardiovascular disease                                                |                                                                                                                                                                                                                                                                                                                                                                      |
| Transient ischemic attack                                             | Sudden onset, $\leq 24$ hours of:<br><i>carotid</i> : temporary motor weakness in one half of the body, language disorder, blindness in one eye<br><br><i>vertebrobasilar</i> : $\geq 2$ simultaneously: bilateral motor weakness or paraesthesia, dizziness, diplopia, dysphagia, ataxia, dysarthria<br><br><i>unknown vascular region</i> : hemianopia, dysarthria |
| Cerebral infarction                                                   | Criteria as for TIA, but duration of $> 24$ hours                                                                                                                                                                                                                                                                                                                    |
| Subarachnoid haemorrhage                                              | Sudden headache and (temporary) loss of consciousness, often accompanied by neck stiffness, nausea and vomiting, with blood in basal cisterns confirmed by CT or xanthochromia in cerebrospinal fluid                                                                                                                                                                |
| Carotid artery stenosis                                               | Duplex ultrasound confirmed stenosis or occlusion of $\geq 1$ carotid artery with diameter reduction $\geq 50\%$                                                                                                                                                                                                                                                     |
| Ischemic retinal syndrome                                             | Visual field defect diagnosed as retinal syndrome by ophthalmologist                                                                                                                                                                                                                                                                                                 |
| Angina pectoris                                                       | Chest pain with proven stenosis on coronary angiogram                                                                                                                                                                                                                                                                                                                |
| Myocardial infarction                                                 | $\geq 2$ of following:<br>- Chest pain $> 20$ minutes, not relieved by nitrates;<br>- ST elevation $> 1$ mm in 2 contiguous ECG leads, or left bundle branch block;<br>- Troponin levels $> 60$ ng/L with rise and fall pattern*                                                                                                                                     |
| Coronary syndrome requiring PCI or CABG                               |                                                                                                                                                                                                                                                                                                                                                                      |
| Abdominal aortic aneurysm                                             | Ultrasound confirmed local dilatation of abdominal aorta with anterior-posterior diameter $\geq 3$ cm and/or distal-proximal ratio of $> 1,5$                                                                                                                                                                                                                        |
| Renal artery stenosis                                                 | Stenosis of $\geq 1$ renal artery with lumen narrowing $\geq 50\%$ , caused by atherosclerosis                                                                                                                                                                                                                                                                       |
| Peripheral artery disease of the lower limbs                          | Fontaine classification:<br>- Fontaine II: intermittent claudication: pain (or other symptoms) in one or both legs after certain walking distance, disappearing at rest;<br>- Fontaine III: rest/nocturnal pain;<br>- Fontaine IV: ischemic ulceration, necrosis or gangrene; confirmed by ABI $\leq 0.90$ at rest and/or $\geq 20\%$ post-exercise decrease         |
| Cardiovascular risk factors                                           |                                                                                                                                                                                                                                                                                                                                                                      |
| Hypertension                                                          | Estimated as severe risk factor by physician, based on e.g. difficult-to-control hypertension, target organ damage, medical or family history                                                                                                                                                                                                                        |
| Hyperlipidaemia                                                       | Estimated as severe risk factor by physician, based on e.g. difficult-to-control hyperlipidaemia, suspected lipid metabolism disorder, medical or family history                                                                                                                                                                                                     |

|                                                                 |                                                                                                                         |
|-----------------------------------------------------------------|-------------------------------------------------------------------------------------------------------------------------|
| Diabetes mellitus                                               | Fasting glucose $\geq 7.0$ mmol/L, non-fasting glucose $\geq 11.1$ mmol/L or use of oral antidiabetic agents or insulin |
| Renal insufficiency                                             | Serum creatinine $> 120$ $\mu\text{mol/L}$                                                                              |
| HIV infection                                                   | Chronic infection with human immunodeficiency virus                                                                     |
| Family medical history                                          | Positive family history for premature cardiovascular disease in 1 <sup>st</sup> degree relatives                        |
| Pre-eclampsia†                                                  | Gestational hypertension accompanied by proteinuria, other maternal organ dysfunction or uteroplacental dysfunction     |
| HELLP syndrome†                                                 | Haemolysis, elevated liver enzymes, low platelets as a manifestation of pre-eclampsia                                   |
| Placental abruption†                                            | Gestational hypertension accompanied by placental abruption as an effect of uteroplacental insufficiency                |
| Intrauterine growth restriction†                                | Gestational hypertension accompanied by fetal growth restriction as an effect of uteroplacental insufficiency           |
| <b>Remaining inclusion criteria</b>                             |                                                                                                                         |
| 18 – 90 years of age                                            |                                                                                                                         |
| Independent in most daily activities                            | Rankin scale $\leq 3$ <sup>1</sup>                                                                                      |
| <b>Exclusion criteria</b>                                       |                                                                                                                         |
| Pregnancy                                                       |                                                                                                                         |
| Short life expectancy                                           |                                                                                                                         |
| Insufficient understanding and expression of the Dutch language |                                                                                                                         |
| No informed consent                                             |                                                                                                                         |
| Follow-up impossible                                            |                                                                                                                         |

\* In earlier years of the UCC-SMART study, this laboratory item was defined as CK elevation of  $\geq 2$ x upper limit and MB-fraction  $> 5\%$  of total CK level.

† Hypertensive pregnancy complications are based on the ISSHP criteria<sup>2</sup>

ABI, ankle-brachial index; CABG, coronary artery bypass grafting; CK, creatine kinase; CT, computed tomography; ECG, electrocardiogram; HELLP, haemolysis, elevated liver enzymes and low platelets; HIV, human immunodeficiency virus; ISSHP, International Society for the Study of Hypertension in Pregnancy; PCI, percutaneous coronary intervention; TIA, transient ischemic attack.

**Supplementary Table 2. Variables available in UCC-SMART**

| Health questionnaire            | Medication use                   | Physical examination                 | Radiology measurements          | Laboratory measurements            |
|---------------------------------|----------------------------------|--------------------------------------|---------------------------------|------------------------------------|
| Medical history                 | Statins                          | Weight (kg)                          | Visceral fat (cm)               | Haemoglobin (mmol/L)               |
| Age (years)                     | Ezetimibe                        | Height (m)                           | Subcutaneous fat (cm)           | Haematocrit (%)                    |
| Sex                             | Fibrates                         | Blood pressure (mmHg)                | Carotid artery stenosis (%)     | Total cholesterol (mmol/L)         |
| Smoking and pack years          | Thiazide diuretics               | Ankle-brachial index                 | Carotid intima thickness (mm)   | LDL-C (mmol/L)                     |
| Alcohol use and number of units | Loop diuretics                   | Body mass index (kg/m <sup>2</sup> ) | Aortic artery diameter (cm)     | HDL-C (mmol/L)                     |
| Level of education              | Potassium saving diuretics       | Waist circumference (cm)             | Kidney size and volume (cm; mL) | Apolipoprotein B (g/L)             |
| Country of birth                | ACE-inhibitors                   | Hip circumference (cm)               | Electrocardiography             | Triglycerides (mmol/L)             |
| Quality of life*                | Angiotensin II-receptor blockers |                                      | Echocardiography†               | HbA1c (%)                          |
| Exercise (MET-hours per week)   | Aldosterone antagonists          |                                      |                                 | Fasting glucose (mmol/L)           |
|                                 | Beta-blockers                    |                                      |                                 | Fasting insulin (mU/L)             |
|                                 | Calcium antagonists              |                                      |                                 | Creatinine (μmol/L)                |
|                                 | Alpha blockers                   |                                      |                                 | eGFR (ml/min/1.73 m <sup>2</sup> ) |
|                                 | Central acting antihypertensives |                                      |                                 | Albuminuria (mg/L)                 |
|                                 | Direct vasodilators              |                                      |                                 | Albumin-to-creatinine ratio        |
|                                 | Aspirin                          |                                      |                                 | CRP (mg/L)                         |
|                                 | Clopidogrel                      |                                      |                                 | TSH (mU/L)                         |
|                                 | Dipyridamole                     |                                      |                                 | Lp(a)                              |
|                                 | DOAC                             |                                      |                                 | Urine sodium                       |
|                                 | Vitamin K antagonists            |                                      |                                 | Urine potassium                    |
|                                 | LMWH                             |                                      |                                 |                                    |
|                                 | Oral glucose-lowering therapy    |                                      |                                 |                                    |
|                                 | Insulin                          |                                      |                                 |                                    |
| Antidepressants                 |                                  |                                      |                                 |                                    |
| Benzodiazepines                 |                                  |                                      |                                 |                                    |

1  
2  
3 \* Based on EQ-5D questionnaire

4 † Echocardiography will be added to the UCC-SMART program in the near future

5  
6 ACE, angiotensin converting enzyme; CRP, C-reactive protein; DOAC, direct oral anticoagulant; eGFR, estimated glomerular filtration rate; HbA1c,  
7 glycosylated haemoglobin type A1c; HDL-C, high-density lipoprotein cholesterol; LDL-C, low-density lipoprotein cholesterol; LMWH, low molecular  
8 weight heparin; Lp(a), lipoprotein(a); MET, metabolic equivalent of task; TSH, thyroid stimulating hormone; UCC-SMART, Utrecht Cardiovascular Cohort –  
9 Second Manifestations of Arterial Diseases  
10  
11  
12  
13  
14  
15  
16  
17  
18  
19  
20  
21  
22  
23  
24  
25  
26  
27  
28  
29  
30  
31  
32  
33  
34  
35  
36  
37  
38  
39  
40  
41  
42  
43  
44  
45  
46

For peer review only

**Supplementary Table 3. Measurements that have been performed in the past**

---

**Vascular wall stiffness** was determined from 2001 until 2003 using the Wall Track System that captures vascular diameter changes using radio-frequent signals. At the first signal, the position of the anterior and posterior vascular wall of the common carotid artery are marked at 2 cm proximal to the carotid bulb. Then, for five times on both the left and right side, changes in arterial diameter ( $\Delta D$ ) and end-diastolic diameter ( $D_d$ ) are registered during four seconds, and the mean is calculated. Carotid distension is defined as the change in artery diameter in systole relative to diastolic diameter. Other stiffness indices include  $\beta$  stiffness index ( $\ln(SBP/DBP)/(\Delta D/D_d)$ ), compliance coefficient ( $(\pi \times D_d \times \Delta D)/2 \times \text{pulse pressure}$ ), distensibility coefficient ( $(2 \times \Delta D/D_d)/\text{pulse pressure}$ ), Peterson's modulus (pressure change required for theoretical 100% increase in diameter) and Young's elastic modulus (pressure per  $\text{mm}^2$  required for theoretical 100% extension).

---

**Flow-mediated vasodilatation (FMD)** was assessed temporarily starting from March 1999. Here, the Wall Track System described above was used to capture the diameter of the brachial artery in the elbow crease. Following 3 baseline readings, new measurements were taken every 30 seconds for 5 minutes: first after a blood pressure cuff at the forearm was inflated to 100 mmHg above SBP for 4 minutes, and then after sublingual administration of 400  $\mu\text{g}$  of nitroglycerin. Endothelial function was defined as the proportional increase of diameter after nitrate and the baseline-adjusted maximal diameter following ischemia. This examination was stopped in June 2001, since analysis in the first 400 patients showed this measurement was not related to other known measures of atherosclerosis.

---

**Quality of life** information was collected through questionnaires based on the 36-Item Short Form Health Survey (SF-36)<sup>3</sup>, sent to participants from 2001 until 2019. This quality of life assessment contains scales for 1) limitations in physical activities; 2) limitations in social activities; 3) limitations in usual role activities because of physical health problems; 4) bodily pain; 5) mental health; 6) limitations in usual role activities because of emotional problems; 7) vitality and 8) general health perceptions.

---

**Homocysteine** was measured from 1998 until 2011 in fasting blood samples by high performance liquid chromatography with fluorescence detection. Up until 2000, a methionine loading test was performed in patients younger than 50 years. Plasma homocysteine was measured six hours after oral administration of 100mg methionine per kilogram bodyweight.

---

DBP, diastolic blood pressure; SBP; systolic blood pressure



**Supplementary Table 4. Definitions of established cardiovascular disease**

| <b>Cardiovascular disease</b> | <b>Definition of cardiovascular disease*</b>                                                                            |
|-------------------------------|-------------------------------------------------------------------------------------------------------------------------|
| Cerebrovascular disease       | TIA, cerebral infarction, ischemic retinal syndrome, carotid surgery or angioplasty in medical history                  |
| Coronary artery disease       | Myocardial infarction, angina pectoris, $\geq 1$ vessel disease on coronary angiography, PCI or CABG in medical history |
| Abdominal aortic aneurysm     | Abdominal aortic aneurysm, surgical or endovascular treatment of abdominal aortic aneurysm in medical history           |
| Peripheral artery disease     | Fontaine classification $\geq$ II, amputation, vascular surgery or angioplasty in medical history                       |

\* Definitions of these items are listed in Supplementary Table 1.

CABG, coronary artery bypass grafting; PCI, percutaneous coronary intervention; TIA, transient ischemic attack.

**Supplementary Table 5. Definitions of outcome events**

| <b>Outcome event</b>                        | <b>Definition of outcome event</b>                                                                                                                                                                                                                                                                                                                                         |
|---------------------------------------------|----------------------------------------------------------------------------------------------------------------------------------------------------------------------------------------------------------------------------------------------------------------------------------------------------------------------------------------------------------------------------|
| <b>Primary endpoints</b>                    |                                                                                                                                                                                                                                                                                                                                                                            |
| <b>Stroke</b>                               |                                                                                                                                                                                                                                                                                                                                                                            |
| Ischemic stroke / haemorrhagic infarction   | >24 hours of associated clinical signs causing increased disability of $\geq 1$ grade on modified Rankin scale <sup>1</sup> , and new (haemorrhagic) infarction on CT or MRI <2 weeks after stroke                                                                                                                                                                         |
| Cerebral haemorrhage                        | Cerebral haemorrhage confirmed with CT, MRI or surgery                                                                                                                                                                                                                                                                                                                     |
| Subarachnoid haemorrhage                    | Subarachnoid haemorrhage confirmed with CT, MRI or surgery                                                                                                                                                                                                                                                                                                                 |
| Type not determined                         | >24 hours of associated clinical signs causing increased disability of $\geq 1$ grade on modified Rankin scale, but no brain imaging performed                                                                                                                                                                                                                             |
| <b>Retinal syndromes</b>                    |                                                                                                                                                                                                                                                                                                                                                                            |
| Infarction                                  | Associated clinical symptoms, typical fundus changes and/or vision loss, scotoma on perimetry                                                                                                                                                                                                                                                                              |
| Haemorrhage                                 | Associated clinical symptoms, typical fundus changes and vision loss                                                                                                                                                                                                                                                                                                       |
| <b>Myocardial infarction</b>                |                                                                                                                                                                                                                                                                                                                                                                            |
|                                             | The assessment includes: chest pain >30 minutes, elevated cardiac enzymes, characteristic ECG-changes                                                                                                                                                                                                                                                                      |
| STEMI                                       | Acute chest pain with persistent (>20 minutes) ST-elevation                                                                                                                                                                                                                                                                                                                |
| NSTEMI                                      | Acute chest pain without ST-elevation, with elevated troponin                                                                                                                                                                                                                                                                                                              |
| Intervention-related myocardial infarction  | New Q wave and elevated troponin <7 days after any intervention (for PCI >3x, for CABG >5x)                                                                                                                                                                                                                                                                                |
| Probable myocardial infarction              | Typical pain, persistent STT-changes, no documented course of cardiac enzymes                                                                                                                                                                                                                                                                                              |
| <b>Heart failure</b>                        |                                                                                                                                                                                                                                                                                                                                                                            |
|                                             | $\geq 2$ of the following: dyspnoea, dyspnoea on exertion, paroxysmal nocturnal dyspnoea, orthopnoea, exercise intolerance, pulmonary oedema, increased central venous pressure, third heart tone, hepatojugular reflux, altered hemodynamics, peripheral oedema, cardiomegaly; and (intensified) treatment with loop diuretics or intravenous vasoactive inotropic agents |
|                                             | Classified as: systolic heart failure (at least moderate left ventricle dysfunction or LVEF <40%) or heart failure with preserved ejection fraction, due to coronary disease, valve disease or other causes                                                                                                                                                                |
| <b>Rupture of abdominal aortic aneurysm</b> |                                                                                                                                                                                                                                                                                                                                                                            |
|                                             | Rupture abdominal aortic aneurysm, proven by ultrasound, CT or laparotomy                                                                                                                                                                                                                                                                                                  |
| <b>Renal disease</b>                        |                                                                                                                                                                                                                                                                                                                                                                            |
| End-stage renal disease                     | CKD stage 5 (i.e. persisting eGFR <15ml/min/1.73 m <sup>2</sup> for >3 months and/or need for renal replacement therapy (chronic dialysis or renal transplantation))                                                                                                                                                                                                       |

|    |                                    |                                                                             |
|----|------------------------------------|-----------------------------------------------------------------------------|
| 1  |                                    |                                                                             |
| 2  |                                    |                                                                             |
| 3  | Acute renal insufficiency –        | Acute kidney injury requiring temporary renal replacement                   |
| 4  | temporary renal replacement        | therapy                                                                     |
| 5  | therapy                            |                                                                             |
| 6  |                                    |                                                                             |
| 7  | Acute renal insufficiency – no     | Acute kidney injury KDIGO stage 3 (i.e. serum creatinine 3                  |
| 8  | renal replacement therapy          | times baseline creatinine and/or serum creatinine $\geq 354$                |
| 9  |                                    | $\mu\text{mol/L}$ )                                                         |
| 10 | <b>Bleeding</b>                    | Bleeding requiring outpatient treatment or (prolonged)                      |
| 11 |                                    | hospitalization                                                             |
| 12 |                                    |                                                                             |
| 13 | Major bleeding                     | <i>ISTH definition:</i> fatal bleeding and/or bleeding in critical area     |
| 14 |                                    | or organ (such as intracranial, intraspinal, intraocular,                   |
| 15 |                                    | retroperitoneal, intra-articular, pericardial, intramuscular                |
| 16 |                                    | causing compartment syndrome), bleeding causing Hb level                    |
| 17 |                                    | drop of $\geq 1.24$ mmol/L or leading to transfusion of $\geq 2$ units of   |
| 18 |                                    | blood <sup>4</sup>                                                          |
| 19 |                                    |                                                                             |
| 20 |                                    |                                                                             |
| 21 |                                    | <i>BARC type 3:</i> overt bleeding with Hb level drop of $\geq 1.86$        |
| 22 |                                    | mmol/L, leading to transfusion, cardiac tamponade, surgical                 |
| 23 |                                    | intervention for control or intravenous vasoactive agents, or               |
| 24 |                                    | located intracranial or intraocular compromising vision                     |
| 25 |                                    | <i>BARC type 5:</i> fatal bleeding <sup>5</sup>                             |
| 26 | <b>Diabetes</b>                    | Self-reported diagnosis, confirmed and classified based on a                |
| 27 |                                    | questionnaire. If necessary, additional information is                      |
| 28 |                                    | requested from the general practitioner or looked up in the                 |
| 29 |                                    | electronic health record.                                                   |
| 30 |                                    |                                                                             |
| 31 | DM type 1                          | Insulin needed immediately at onset and absence of oral                     |
| 32 |                                    | glucose lowering medication. Supportive but not mandatory:                  |
| 33 |                                    | $\leq 25$ years of age, BMI $< 25$ kg/m <sup>2</sup> , presence of anti-GAD |
| 34 |                                    | antibodies                                                                  |
| 35 |                                    |                                                                             |
| 36 |                                    |                                                                             |
| 37 | DM type 2                          | Diagnosed between age 35 and 40 and BMI $> 33$ kg/m <sup>2</sup> or         |
| 38 |                                    | diagnosed after age 40 and BMI $> 27$ kg/m <sup>2</sup>                     |
| 39 | <b>Dementia</b>                    | Self-reported diagnosis, confirmed and classified based on a                |
| 40 |                                    | questionnaire. Classified as: Alzheimer's disease; vascular                 |
| 41 |                                    | dementia; a mix of Alzheimer's disease and vascular                         |
| 42 |                                    | dementia; Lewy Body dementia; or frontotemporal dementia.                   |
| 43 | <b>Vascular mortality</b>          |                                                                             |
| 44 | Fatal cerebral infarction          | Cerebral infarction leading to Rankin score 4 or 5 followed by              |
| 45 |                                    | death (reasonably plausible that patient would not have died                |
| 46 |                                    | without infarction)                                                         |
| 47 |                                    |                                                                             |
| 48 | Fatal cerebral haemorrhage         | Cerebral haemorrhage leading to Rankin score 4 or 5                         |
| 49 |                                    | followed by death (reasonably plausible that patient would                  |
| 50 |                                    | not have died without infarction)                                           |
| 51 |                                    |                                                                             |
| 52 |                                    |                                                                             |
| 53 | Fatal stroke - type not determined | Stroke without radiological confirmation leading to Rankin                  |
| 54 |                                    | score 4 or 5 followed by death (reasonably plausible that                   |
| 55 |                                    | patient would not have died without stroke)                                 |
| 56 |                                    |                                                                             |
| 57 | Fatal myocardial infarction        | Documented myocardial infarction followed by death ( $> 1$                  |
| 58 |                                    | hour after onset of symptoms)                                               |
| 59 |                                    |                                                                             |
| 60 | Fatal heart failure                | Heart failure leading to death                                              |

|                                                          |                                                                                                                                                                                                                                                                                                                                                                                                                               |
|----------------------------------------------------------|-------------------------------------------------------------------------------------------------------------------------------------------------------------------------------------------------------------------------------------------------------------------------------------------------------------------------------------------------------------------------------------------------------------------------------|
| Fatal rupture abdominal aortic aneurysm                  | Rupture abdominal aortic aneurysm followed by death                                                                                                                                                                                                                                                                                                                                                                           |
| Fatal bleeding                                           | Major bleeding leading to death                                                                                                                                                                                                                                                                                                                                                                                               |
| Sudden death                                             | Witnessed death occurring within 1 hour after onset of symptoms, or within 24 hours given convincing circumstantial evidence                                                                                                                                                                                                                                                                                                  |
| Other                                                    | Death without apparent cause in case of cardiovascular history, terminal renal insufficiency, dementia (unless clearly non-vascular), pulmonary haemorrhage*                                                                                                                                                                                                                                                                  |
| <b>Non-vascular mortality</b>                            | Death caused by malignancy, infection, unnatural death or other                                                                                                                                                                                                                                                                                                                                                               |
| <b>All-cause mortality</b>                               | Death from any cause                                                                                                                                                                                                                                                                                                                                                                                                          |
|                                                          | Secondary endpoints                                                                                                                                                                                                                                                                                                                                                                                                           |
| <b>Amputation</b>                                        | Any amputation of a toe or part of the foot or leg due to chronic ischemia. <i>Excluding</i> : traumatic amputations, amputation due to sepsis, amputation of fingers.                                                                                                                                                                                                                                                        |
| <b>Vascular intervention†</b>                            | Percutaneous coronary intervention; coronary artery bypass grafting; carotid endarterectomy, angioplasty or stenting; vertebral artery angioplasty or stenting; vascular surgery or percutaneous transluminal angioplasty of the aorta(bifurcation), iliac arteries, femoral and crural arteries; vascular intervention because of abdominal angina; LVAD. Angioplasty and stenting of other arteries are registered as well. |
| <b>Vascular intervention of an intracranial aneurysm</b> | Coiling or clipping of an intracranial aneurysm                                                                                                                                                                                                                                                                                                                                                                               |

\* In accordance with Antiplatelets Trialists' Collaboration, Lancet 2002

† Excluding interventions already planned before or at inclusion, but including re-interventions and complications of an intervention already planned before or at inclusion.

Anti-GAD, antibodies to glutamic acid decarboxylase; BARC; Bleeding Academic Research Consortium; BMI, body mass index; CABG, coronary artery bypass grafting; CKD, chronic kidney disease; CT, computed tomography; ECG, electrocardiogram; eGFR, estimated glomerular filtration rate; Hb, haemoglobin; KDIGO, Kidney Disease Improving Global Outcomes; LVAD, left ventricular assist device; LVEF, left ventricular ejection fraction; MRI, magnetic resonance imaging; NSTEMI, non-ST-elevation myocardial infarction; PCI, percutaneous coronary intervention; STEMI, ST-elevation myocardial infarction

Supplementary Table 6. Substudies of UCC-SMART

| Substudy                                                                                      | Period in which the patients were included | N                                                       | Aim                                                                                                                                                                                                                                                                | Key publications                                                                                                            | Additional measurements within substudy                                                                                                                                                                                                                                                                          |
|-----------------------------------------------------------------------------------------------|--------------------------------------------|---------------------------------------------------------|--------------------------------------------------------------------------------------------------------------------------------------------------------------------------------------------------------------------------------------------------------------------|-----------------------------------------------------------------------------------------------------------------------------|------------------------------------------------------------------------------------------------------------------------------------------------------------------------------------------------------------------------------------------------------------------------------------------------------------------|
| <b>ARTEMIS</b><br>( <i>ARTE</i> rial calcifications of the <i>Media and Intima in SMART</i> ) | 2015 - 2017                                | 520                                                     | 1) To determine whether intima and media calcification differ in their respective associated CVD risks. 2) To elucidate which risk factors and mechanisms lead to the development of these respective types of calcification and in turn to cardiovascular disease | - Zwakenberg, 2020, PloS One <sup>6</sup><br>- Hoek, 2021, Atherosclerosis <sup>7</sup>                                     | <u>Technique</u> : unenhanced thin-slice CT-scan of the legs (femoral head to feet)<br><u>Measurement</u> : calcification in the femoral and crural arteries scored as absent, predominant intimal arterial calcification, predominant medial arterial calcification or indistinguishable; calcification volume. |
| <b>Athero-Express</b><br><i>Added to UCC-SMART study in June 2022</i>                         | 2002 - present                             | Patients undergoing a femoral or carotid endarterectomy | To investigate the value of plaque characteristics in relation to cardiovascular outcomes                                                                                                                                                                          | Verhoeven, 2004, Eur J Epidemiology <sup>8</sup>                                                                            | During surgery, the atherosclerotic plaque is collected and immunohistochemically stained in order to assess fat, collagen, macrophages and smooth muscle cells                                                                                                                                                  |
| <b>BEST</b><br>( <i>BEtter risk factor treatment with STructured agreement</i> )<br><br>RCT   | 2004 - 2006                                | 197 patients with at least 2 modifiable risk factors    | To investigate whether a clearly written agreement on risk factor management between general practitioners and hospital improved the vascular risk profile of high-risk patients compared with usual care after 1 year                                             | Brouwer, B.G. 2008. SMART risk factor screening in patients at high vascular risk. Utrecht University, Utrecht <sup>9</sup> | NA                                                                                                                                                                                                                                                                                                               |
| <b>Brown adipose tissue</b>                                                                   | 2014 – 2016                                | 50 patients with clinically manifest CVD                | 1) To evaluate and optimize a protocol for quantifying brown adipose tissue with MRI and to assess BAT volume per patient. 2) To evaluate the reproducibility of MRI by determining inter-scan, intra-observer and inter-observer variability in BAT volume        | - Franssens, 2016, NMR Biomed <sup>10</sup><br>- Franssens, 2017, J Magn. Reson. Imaging <sup>11</sup>                      | <u>Technique</u> : 1.5T water-fat MRI of supraclavicular and subcutaneous adipose tissue<br><u>Measurement</u> : fat signal fraction value, representative of the amount of triglycerides, intracellular water content and capillary density, of supraclavicular and subcutaneous adipose tissue                 |

|                                                                                                          |             |                                                                                                                                                                              |                                                                                                                                                                                                                                                                                                                                                                                                                                                                                                             |                                                                                                       |                                                                                                                                                                                                                                                                                                                                                                                                                                                                                                                                                 |
|----------------------------------------------------------------------------------------------------------|-------------|------------------------------------------------------------------------------------------------------------------------------------------------------------------------------|-------------------------------------------------------------------------------------------------------------------------------------------------------------------------------------------------------------------------------------------------------------------------------------------------------------------------------------------------------------------------------------------------------------------------------------------------------------------------------------------------------------|-------------------------------------------------------------------------------------------------------|-------------------------------------------------------------------------------------------------------------------------------------------------------------------------------------------------------------------------------------------------------------------------------------------------------------------------------------------------------------------------------------------------------------------------------------------------------------------------------------------------------------------------------------------------|
| <p><b>DISH</b><br/>(Diffuse idiopathic skeletal hyperostosis)</p>                                        | 1996 – 2018 | 4,791 (all patients from SMART with chest X-ray within 3 months of inclusion)                                                                                                | N.A.                                                                                                                                                                                                                                                                                                                                                                                                                                                                                                        | <p>- Harlianto, 2021, Rheumatology<sup>12</sup><br/>- Harlianto, 2021, J. Pers. Med.<sup>13</sup></p> | <p><i>Technique: Chest X-ray within three months of inclusions (if available in routine clinical care)</i></p> <p><u>Measurement:</u> X-rays were scored for DISH using the Resnick criteria.<sup>14</sup> DISH is classified following the presence of ossification of at least four contiguous vertebrae; (relative) preservation of the intervertebral disc height; and the absence of apophyseal joint bony ankylosis or sacroiliac joint erosion. Thoracic aortic calcification subjective score as absent, mild, moderate and severe.</p> |
| <p><b>IRIS</b><br/>(Internet-based vascular Risk factor Intervention and Self-management)</p> <p>RCT</p> | 2008 - 2010 | 330 patients with a recent clinical manifestation of atherosclerosis of CAD, CeVD or PAD and with $\geq 2$ treatable risk factors not at goal (from UMC Utrecht + Rijnstate) | <p>1) To evaluate whether an internet-based vascular risk factor management program promoting self-efficacy on top of usual care is more effective than usual care alone in reducing vascular risk factors in patients with a recent clinical manifestation of a vascular disease.</p> <p>2) To evaluate whether an internet-based vascular risk factor management program for reducing vascular risk factors in patients with a recent clinical manifestation of a vascular disease is cost-effective.</p> | <p>- Vernooij, 2012, BMJ<sup>15</sup><br/>- Greving, 2015, BMJ Open<sup>16</sup></p>                  | NA                                                                                                                                                                                                                                                                                                                                                                                                                                                                                                                                              |
| <p><b>RULE</b><br/>(Risk management in Utrecht and</p>                                                   | 2005 - 2007 | 604 patients with CAD, CeVD, PAD or T2DM from                                                                                                                                | To assess risk factor status after referral in patients with established vascular disease or type 2 diabetes who took part in the                                                                                                                                                                                                                                                                                                                                                                           | Brouwer, 2010, J of Int Med <sup>17</sup>                                                             | NA                                                                                                                                                                                                                                                                                                                                                                                                                                                                                                                                              |

|                                                                                       |                |                                                                                                                                              |                                                                                                                                                                                                             |                                                                                                                                                                                                |                                                                                                                                                                                                                                                                                                  |
|---------------------------------------------------------------------------------------|----------------|----------------------------------------------------------------------------------------------------------------------------------------------|-------------------------------------------------------------------------------------------------------------------------------------------------------------------------------------------------------------|------------------------------------------------------------------------------------------------------------------------------------------------------------------------------------------------|--------------------------------------------------------------------------------------------------------------------------------------------------------------------------------------------------------------------------------------------------------------------------------------------------|
| <i>Leiden Evaluation study</i><br>Two-centre parallel-group comparative investigation |                | UMC Utrecht (+ 566 patients from LUMC)                                                                                                       | multidisciplinary hospital-based vascular screening program SMART, compared with a group who did not participate in such a program                                                                          |                                                                                                                                                                                                |                                                                                                                                                                                                                                                                                                  |
| <b>Small aneurysms trial (AAA)</b>                                                    | 1996 - 2005    | 230 patients with an initial AAA diameter of 30-55mm, who were examined by $\geq 2$ AAA diameter measurements and with $\geq 6$ months of FU | To estimate overall rupture rates of small AAAs and to investigate a predefined set of demographic characteristics and cardiovascular risk factors for association with AAA growth                          | Schlosser, 2008, J Vasc Surg <sup>18</sup>                                                                                                                                                     | <u>Technique:</u> Ultrasound scanning of the aorta<br><br><u>Measurement:</u> AAA diameter and change with initial AAA diameter                                                                                                                                                                  |
| <b>SMART-2</b>                                                                        | 2007 - present | 1794 patients with a history of CVD or diabetes, a median of 9.9 years after inclusion in UCC-SMART                                          | To study the course of atherosclerosis and vascular risk factors over time, and to evaluate the effects of treatment in the past                                                                            |                                                                                                                                                                                                | NA                                                                                                                                                                                                                                                                                               |
| <b>SMART HEART</b>                                                                    | 1996 - 2006    | 536 patients with $\geq 3$ years hypertension, but free of known coronary or valvular disease                                                | To detect patient characteristics related to the development of LVH with special focus on the detection of SNPs that confer an increased susceptibility for the development of LVH, and thus, heart failure | - Meijs, 2007, Neth Heart J <sup>19</sup><br>- Meijs, 2009, Eur J Prev Cardio <sup>20</sup><br>- Vernooij, 2012, Am J Cardio <sup>21</sup><br>- De Beus, 2015, Eur J Clin Invest <sup>22</sup> | <u>Technique:</u> 1.5T cardiac MRI and delayed-enhancement cardiac MRI<br><br><u>Measurement:</u> LV mass, LV-end diastolic and end-systolic volumes and left atrial volumes; areas of hyperintense myocardium classified as myocardial scar tissue (used to assess the presence of unrecognized |

|                                                           |                                                                                                 |                                                 |                                                                                                                                                                                                                                                                                                                  |                                                                                                                                                                                                                                                                                                                                |                                                                                                                                                                                                                                                                                                                                                                                            |
|-----------------------------------------------------------|-------------------------------------------------------------------------------------------------|-------------------------------------------------|------------------------------------------------------------------------------------------------------------------------------------------------------------------------------------------------------------------------------------------------------------------------------------------------------------------|--------------------------------------------------------------------------------------------------------------------------------------------------------------------------------------------------------------------------------------------------------------------------------------------------------------------------------|--------------------------------------------------------------------------------------------------------------------------------------------------------------------------------------------------------------------------------------------------------------------------------------------------------------------------------------------------------------------------------------------|
|                                                           |                                                                                                 |                                                 |                                                                                                                                                                                                                                                                                                                  |                                                                                                                                                                                                                                                                                                                                | myocardial infarction). Infarct size was quantified as scar mass relative to LV mass.                                                                                                                                                                                                                                                                                                      |
| <b>SMART Inform</b><br>Three-armed hypothesis-blinded RCT | 2017 - 2018                                                                                     | 303 patients with stable CVD and using a statin | To determine whether communicating personalized statin therapy-effects obtained by prognostic algorithm leads to lower decisional conflict associated with statin use in patients with stable CVD compared with standard (non-personalized) therapy-effects                                                      | Jaspers, 2021, BMJ Open <sup>23</sup>                                                                                                                                                                                                                                                                                          | NA                                                                                                                                                                                                                                                                                                                                                                                         |
| <b>SMART-Junior</b>                                       | Questionnaires sent between 2009-2013 to patients who were included between 2001 and 2012       | 4,270 (10,564 children)                         | 1) To investigate the presence of cardiovascular risk factors and vascular disease in offspring of patients participating in the SMART cohort. 2) To identify a risk profile of the parent prognostic for the development of traditional cardiovascular risk factors or cardiovascular events in their children. | - Weijmans, 2015, Int J Cardiol <sup>24</sup><br>- Weijmans, 2015, Am Heart J <sup>25</sup>                                                                                                                                                                                                                                    | - Questions about CV risk factors (incl. dates of risk factor diagnoses): presence of diabetes, hypertension, hypercholesterolemia, smoking behaviour and present weight of the offspring<br>- Questions about CVD (incl. dates of occurrence): whether offspring had experienced MI, PCI, CABG, stroke, PAD, or AAA.                                                                      |
| <b>SMART-MR and SMART Medea</b>                           | 2001 - 2005<br><br>1 <sup>st</sup> follow-up: 2006-2009<br>2 <sup>nd</sup> follow-up: 2013-2017 | 1,309                                           | To investigate brain changes using 1.5T MRI in patients with symptomatic atherosclerotic disease (and 7T MRI in follow-up from 2013-2017)                                                                                                                                                                        | - Geerlings, 2010, Atherosclerosis <sup>26</sup><br>- Muller, 2011, Ann Neurol <sup>27</sup><br>- Conijn, 2011, Stroke <sup>28</sup><br>- Kloppenborg, 2012, Neurology <sup>29</sup><br>- Jochemsen 2013, JAMA Neurology <sup>30</sup><br>- Van der Veen, 2015, Stroke <sup>31</sup><br>- Zwartbol, 2019, Stroke <sup>32</sup> | <u>Technique:</u><br>- 1.5T brain MRI<br>- 7T brain MRI<br><br><u>Measurement:</u><br>- Total cerebral blood flow (mL/min per 100 mL brain parenchymal volume)<br>- White matter lesions: volume (mL), shape (using the concavity index and fractal dimension <sup>35</sup> ) and location were scored<br>- Brain parenchymal fraction (% of intracranial volume (ICV) that is occupied by |



1  
2  
3  
4  
5  
6  
7  
8  
9  
10  
11  
12  
13  
14  
15  
16  
17  
18  
19  
20  
21  
22  
23  
24  
25  
26  
27  
28  
29  
30  
31  
32  
33  
34  
35  
36  
37  
38  
39  
40  
41  
42  
43  
44  
45  
46

|                                                                                                                         |                |                                                                                 |                                                                                                                                                                                                                                     |                                                                                                                                                                                    |                                                                                                                                                                                                                                                                                                                                                                                                                                                                                                                                                                                                                                                                                                                                                                                                                                                                                                                                                                                                                                                                                                                                                                             |
|-------------------------------------------------------------------------------------------------------------------------|----------------|---------------------------------------------------------------------------------|-------------------------------------------------------------------------------------------------------------------------------------------------------------------------------------------------------------------------------------|------------------------------------------------------------------------------------------------------------------------------------------------------------------------------------|-----------------------------------------------------------------------------------------------------------------------------------------------------------------------------------------------------------------------------------------------------------------------------------------------------------------------------------------------------------------------------------------------------------------------------------------------------------------------------------------------------------------------------------------------------------------------------------------------------------------------------------------------------------------------------------------------------------------------------------------------------------------------------------------------------------------------------------------------------------------------------------------------------------------------------------------------------------------------------------------------------------------------------------------------------------------------------------------------------------------------------------------------------------------------------|
|                                                                                                                         |                |                                                                                 |                                                                                                                                                                                                                                     | <ul style="list-style-type: none"> <li>- Ghaznawi 2021, Neurology<sup>33</sup></li> <li>- Rissanen, 2021, Neurology<sup>34</sup></li> </ul>                                        | <p>brain tissue), an indicator for global brain atrophy</p> <ul style="list-style-type: none"> <li>- Ventricular enlargement (% of ventricular volume of the total ICV), an indicator for subcortical brain atrophy</li> <li>- Cortical gray matter fraction (% cortical gray matter volume of the total ICV), an indicator of cortical brain atrophy</li> <li>- Infarcts: location, affected flow territory and type were scored</li> </ul> <p><u>Neuropsychological assessment (from 2003):</u></p> <ul style="list-style-type: none"> <li>- 15-learning word test<sup>36</sup></li> <li>- Rey-Osterrieth Complex Figure test<sup>37</sup></li> <li>- Visual Elevator test<sup>38</sup></li> <li>- Brixton Spatial Anticipation test<sup>39</sup></li> <li>- Verbal Fluency test (letter)<sup>40</sup></li> <li>- Dutch version of the National Adult Reading test<sup>41</sup></li> </ul> <p><u>From 2006:</u></p> <ul style="list-style-type: none"> <li>- MMSE<sup>42</sup></li> <li>- Verbal Fluency test (animals)<sup>40</sup></li> <li>- Digit Symbol Substitution Test<sup>43</sup></li> <li>- Forward Digit Span and Backward Digit Span<sup>44</sup></li> </ul> |
| <b>SMART-ORACLE</b><br><i>(Optimizing Risk Assessment with CT-angiography or Calcium score in patients at high risk</i> | 2012 - present | 1.182 (until Dec 2021; ongoing) patients with a history of symptomatic vascular | 1) To determine whether there is additional value of performing CAC score, CTCA, total aorta calcification, burden as compared to traditional risk factors in the risk stratification in predicting any cardiovascular event. 2) To | <ul style="list-style-type: none"> <li>- Franssens, 2017, Eur J of Prev Cardiol<sup>45</sup></li> <li>- Van 't Klooster, 2020, IJC Heart &amp; Vasculature<sup>46</sup></li> </ul> | <u>Technique:</u> Cardiac non-contrast enhanced CT and CTA of the heart and the carotids to the circle of Willis                                                                                                                                                                                                                                                                                                                                                                                                                                                                                                                                                                                                                                                                                                                                                                                                                                                                                                                                                                                                                                                            |

|                                                                                                                                  |                                                         |                                                                                                                                                                  |                                                                                                                                                                                                                                                                                                                                                                                                                                |                                                                                                  |                                                                                                                                                                                                                                                                                                                                                                                |
|----------------------------------------------------------------------------------------------------------------------------------|---------------------------------------------------------|------------------------------------------------------------------------------------------------------------------------------------------------------------------|--------------------------------------------------------------------------------------------------------------------------------------------------------------------------------------------------------------------------------------------------------------------------------------------------------------------------------------------------------------------------------------------------------------------------------|--------------------------------------------------------------------------------------------------|--------------------------------------------------------------------------------------------------------------------------------------------------------------------------------------------------------------------------------------------------------------------------------------------------------------------------------------------------------------------------------|
| for a cardiovascular event)                                                                                                      |                                                         | disease, T2DM or hypertension                                                                                                                                    | estimate the additional value of CTCA and CAC score on top of traditional risk factors in predicting cardiac events. 3) To determine the value of soft plaque burden in the carotid and coronary arteries in predicting acute vascular events                                                                                                                                                                                  |                                                                                                  | <u>Measurement:</u><br>- Radiodensity and volume of epicardial adipose tissue<br>- Coronary artery calcium (scored using the Agatston method <sup>47</sup> )<br>- Calcifications on heart valves and in the thoracic aorta (quantified using a pseudo-mass score: mean calcium hounsfield units × region of interest volume)<br>- CAD-RADS <sup>48</sup><br>- Carotid stenosis |
| <b>SPAIN</b><br>(Selfmanagement of vascular Patients Activated by Internet and Nurses)                                           | 2005                                                    | 50 patients with computer facilities                                                                                                                             | 1) To evaluate the feasibility of an Internet-based vascular risk reduction program in terms of accessibility, frequency and pattern of use of an individualized website for patients with a recent clinical manifestation of arterial disease. 2) To evaluate whether the use was related to a change in vascular risk factors after 6 months                                                                                 | Goessens, 2008, Patient education and counseling <sup>49</sup>                                   | NA                                                                                                                                                                                                                                                                                                                                                                             |
| <b>TEMPUS</b><br>(The Evening versus Morning Polypill Utilization Study)<br><br>Randomized open blinded endpoint crossover trial | 1996 - 2009. Patients were screened between 2012 - 2013 | 78 patients with established CVD or those at intermediate to high risk of CVD with indication for the use of cardiovascular medication, according to the current | 1) To assess whether there is a difference in the morning or evening administration of a cardiovascular polypill, an FDC formulation containing aspirin, simvastatin, lisinopril and hydrochlorothiazide, on LDL-C and mean 24-hour systolic BP levels in individuals at high risk of cardiovascular disease. 2) To assess the effect of the polypill on LDL-C, ambulatory BP, anti-platelet function, adherence and patients' | - Lafeber, 2014, Eur J Prev Cardiol <sup>50</sup><br>- Lafeber, 2014, Int J Cardio <sup>51</sup> | At baseline and at the end of each treatment period: medical history, anthropometric parameters, laboratory blood tests, office BP, 24-hour ambulatory BP monitoring, platelet function, pulse wave analysis, adherence to therapy, and questionnaires                                                                                                                         |

|                                                                         |                                                     |                                                    |                                                                                                                                                                                                        |                                                                                                           |                                                                                                                                                                                                                                                                                                                                         |
|-------------------------------------------------------------------------|-----------------------------------------------------|----------------------------------------------------|--------------------------------------------------------------------------------------------------------------------------------------------------------------------------------------------------------|-----------------------------------------------------------------------------------------------------------|-----------------------------------------------------------------------------------------------------------------------------------------------------------------------------------------------------------------------------------------------------------------------------------------------------------------------------------------|
|                                                                         |                                                     | Dutch guidelines                                   | preference as compared to the administration of the individual, identically dosed components of the polypill administered at different times of the day, as is currently recommended in clinical care. |                                                                                                           |                                                                                                                                                                                                                                                                                                                                         |
| <b>VENUS</b><br><i>(Vascular prEvention by Nurses Study)</i><br><br>RCT | Patients included between May 2002 and October 2003 | 236 patients with $\geq 2$ modifiable risk factors | To investigate whether risk factor management in the hospital improved with nurse practitioner care plus usual care compared with usual care                                                           | - Goessens, 2006, Eur J Cardiovasc Prev Rehabil <sup>52</sup><br>- Sol, 2009, Eur J C Nurse <sup>53</sup> | Questionnaire about social support using a social support questionnaire for Dutch CHD patients:<br>- Structural support: whether they have a spouse and whether they have someone they could turn to about their health problems<br>- Functional support: statements about active involvement, protective buffering and overprotection. |

AAA, aortic abdominal aneurysm; BAT, brown adipose tissue; BP, blood pressure; CABG, coronary artery bypass grafting; CAC, coronary artery calcium; CAD, coronary artery disease, CAD-RADS, CAD-reporting and data system, CeVD, cerebrovascular disease; CHD, coronary heart disease; CT, computed tomography; CTA, CT angiography; CTCA, CT coronary angiography; CV, cardiovascular; CVD, cardiovascular disease; DISH, diffuse idiopathic skeletal hyperostosis; FDC, fixed dose combination; FU, follow-up; LDL-c, low-density lipoprotein cholesterol; LUMC, Leiden University Medical Center; LV, left ventricle; LVH, left ventricle hypertrophy; MI, myocardial infarction; MRI, magnetic resonance imaging; NA, not applicable; PAD, peripheral artery disease; PCI, percutaneous coronary intervention; RCT, randomized controlled trial; SMART, Second Manifestations of Arterial Disease; SNP; single nucleotide polymorphism; T2DM, type 2 diabetes mellitus; UCC-SMART, Utrecht Cardiovascular Cohort-SMART; UMC, University Medical Center

### Supplemental Figure 1. Timeline of substudies of UCC-SMART

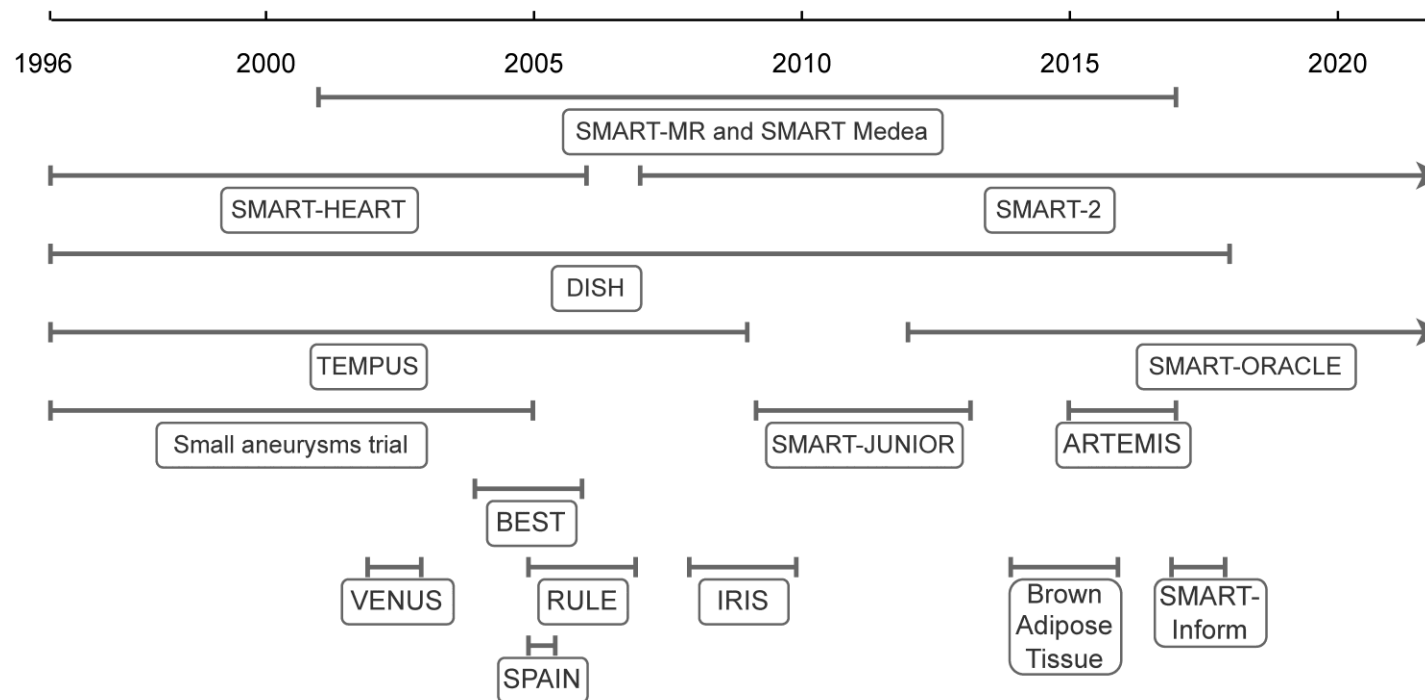

1.5T brain MRIs have been performed between 2001 and 2005. Follow-up of 1.5T MRI was performed between 2006 and 2009 and from 2013 to 2017. During the second follow-up, a 7T brain MRI was added in a subsample. A detailed overview of the substudies is provided in Supplementary Table 5.

ARTEMIS, ARTERial calcifications of the Media and Intima in SMART (Second Manifestations of Arterial Disease)<sup>6</sup>; BEST, BETter risk factor treatment with STructured agreement<sup>9</sup>; Brown Adipose Tissue<sup>10</sup>; DISH, Diffuse idiopathic skeletal hyperostosis<sup>12</sup>; IRIS, Internet-based vascular Risk factor Intervention and Self-management<sup>15</sup>; RULE, Risk management in Utrecht and Leiden Evaluation study<sup>17</sup>; SMART HEART<sup>19</sup>; SMART Inform<sup>23</sup>; SMART-JUNIOR<sup>24</sup>; SMART-MR<sup>26</sup>; ORACLE; Optimizing Risk Assessment with CT-angiography or Calcium score in patients at high risk for a cardiovascular event<sup>45</sup>; SPAIN, Self-management of vascular Patients Activated by Internet and Nurses<sup>49</sup>; TEMPUS, The Evening versus Morning Polypill Utilization Study<sup>50</sup>; VENUS, Vascular prEvention by NUrses Study<sup>52</sup>.

## References

1. van Swieten JC, Koudstaal PJ, Visser MC, Schouten HJ, van Gijn J. Interobserver agreement for the assessment of handicap in stroke patients. *Stroke*. 1988 May;19(5):604–7.
2. Brown MA, Magee LA, Kenny LC, Karumanchi SA, McCarthy FP, Saito S, et al. Hypertensive Disorders of Pregnancy. *Hypertension*. 2018 Jul;72(1):24–43.
3. Ware JEJ, Sherbourne CD. The MOS 36-item short-form health survey (SF-36). I. Conceptual framework and item selection. *Med Care*. 1992 Jun;30(6):473–83.
4. Schulman S, Kearon C. Definition of major bleeding in clinical investigations of antihemostatic medicinal products in non-surgical patients. *J Thromb Haemost*. 2005 Apr 4;3(4):692–4.
5. Mehran R, Rao S V, Bhatt DL, Gibson CM, Caixeta A, Eikelboom J, et al. Standardized bleeding definitions for cardiovascular clinical trials: a consensus report from the Bleeding Academic Research Consortium. *Circulation*. 2011 Jun;123(23):2736–47.
6. Zwakenberg SR, De Jong PA, Hendriks EJ, Westerink J, Spiering W, De Borst GJ, et al. Intimal and medial calcification in relation to cardiovascular risk factors. *PLoS One*. 2020;15(7 July):1–14.
7. Hoek AG, Zwakenberg SR, Elders PJM, de Jong PA, Spiering W, Bartstra JW, et al. An elevated ankle-brachial index is not a valid proxy for peripheral medial arterial calcification. *Atherosclerosis*. 2021;323(March):13–9.
8. Verhoeven BAN, Velema E, Schoneveld AH, de Vries JPPM, de Bruin P, Seldenrijk CA, et al. Athero-express: differential atherosclerotic plaque expression of mRNA and protein in relation to cardiovascular events and patient characteristics. Rationale and design. *Eur J Epidemiol*. 2004;19(12):1127–33.
9. Brouwer BG. SMART risk factor screening in patients at high vascular risk [dissertation]. Utrecht University; 2008.
10. Franssens BT, Eikendal AL, Leiner T, van der Graaf Y, Visseren FLJ, Hoogduin JM. Reliability and agreement of adipose tissue fat fraction measurements with water-fat MRI in patients with manifest cardiovascular disease. *NMR Biomed*. 2016;29(1):48–56.
11. Franssens BT, Hoogduin H, Leiner T, van der Graaf Y, Visseren FLJ. Relation between brown adipose tissue and measures of obesity and metabolic dysfunction in patients with cardiovascular disease. *J Magn Reson Imaging*. 2017;46(2):497–504.
12. Harlianto NI, Oosterhof N, Foppen W, Hol ME, Wittenberg R, van der Veen PH, et al. Diffuse idiopathic skeletal hyperostosis is associated with incident stroke in patients with increased

- 1  
2  
3 cardiovascular risk. *Rheumatology*. 2021;1–8.  
4
- 5 13. Harlianto NI, Westerink J, Foppen W, Hol ME, Wittenberg R, Van Der Veen PH, et al.  
6 Visceral adipose tissue and different measures of adiposity in different severities of diffuse  
7 idiopathic skeletal hyperostosis. *J Pers Med*. 2021;11(7):1–11.  
8  
9
- 10 14. Resnick D, Niwayama G. Radiographic and pathologic features of spinal involvement in  
11 diffuse idiopathic skeletal hyperostosis (DISH). *Radiology*. 1976 Jun;119(3):559–68.  
12  
13
- 14 15. Vernooij WP, Kaasjager HAH, Van Der Graaf Y, Wierdsma J, Grandjean HMH, Hovens  
15 MMC, et al. Internet based vascular risk factor management for patients with clinically  
16 manifest vascular disease: Randomised controlled trial. *BMJ*. 2012;344(7863):1–13.  
17  
18
- 19 16. Greving JP, Kaasjager HAH, Vernooij JWP, Hovens MMC, Wierdsma J, Grandjean HMH, et  
20 al. Cost-effectiveness of a nurse-led internet-based vascular risk factor management  
21 programme: Economic evaluation alongside a randomised controlled clinical trial. *BMJ Open*.  
22 2015;5(5):1–8.  
23  
24
- 25 17. Brouwer BG, Visseren FLJ, Algra A, Van Bockel JH, Bollen ELEM, Doevendans PA, et al.  
26 Effectiveness of a hospital-based vascular screening programme (SMART) for risk factor  
27 management in patients with established vascular disease or type 2 diabetes: A parallel-group  
28 comparative study. *J Intern Med*. 2010;268(1):83–93.  
29  
30
- 31 18. Schlösser FJV, Tangelder MJD, Verhagen HJM, van der Heijden GJMG, Muhs BE, van der  
32 Graaf Y, et al. Growth predictors and prognosis of small abdominal aortic aneurysms. *J Vasc  
33 Surg*. 2008;47(6):1127–33.  
34  
35
- 36 19. Meijs MFL, Bots ML, Vonken EJA, Cramer MJM, Melman PG, Velthuis BK, et al. Rationale  
37 and design of the SMART Heart study. *Netherlands Hear J*. 2007;15(9):295–8.  
38  
39
- 40 20. Meijs MF I., Vergouwe Y, Cramer MJ m., Vonken EJA, Velthuis BK, Verton DJ, et al. A  
41 prediction model for left ventricular mass in patients at high cardiovascular risk. *Eur J Prev  
42 Cardiol*. 2010;17(6):621–7.  
43  
44
- 45 21. Vernooij JWP, Cramer MJM, Visseren FLJ, Korndewal MJ, Bots ML, Meijs MFL, et al.  
46 Relation between abdominal obesity, insulin resistance and left ventricular hypertrophy  
47 diagnosed by electrocardiogram and magnetic resonance imaging in hypertensive patients. *Am  
48 J Cardiol*. 2012;110(2):227–33.  
49  
50
- 51 22. de Beus E, Meijs MFL, Bots ML, Visseren FLJ, Blankestijn PJ, Algra A, et al. Presence of  
52 albuminuria predicts left ventricular mass in patients with chronic systemic arterial  
53 hypertension. *Eur J Clin Invest*. 2015;45(6):550–6.  
54  
55  
56  
57  
58  
59  
60

- 1  
2  
3 23. Jaspers NEM, Visseren FLJ, Van Der Graaf Y, Smulders YM, Damman OC, Brouwers C, et al.  
4 Communicating personalised statin therapy-effects as 10-year CVD-risk or CVD-free life-  
5 expectancy: Does it improve decisional conflict? Three-armed, blinded, randomised controlled  
6 trial. *BMJ Open*. 2021;11(7):1–8.  
7  
8  
9  
10 24. Weijmans M, Van Der Graaf Y, De Borst GJ, Asselbergs FW, Cramer MJ, Algra A, et al.  
11 Prevalence and risk of cardiovascular risk factors and events in offspring of patients at high  
12 vascular risk and effect of location of parental vascular disease. *Int J Cardiol*. 2015;195:195–  
13 202.  
14  
15  
16  
17 25. Weijmans M, Van Der Graaf Y, De Borst GJ, Asselbergs FW, Cramer MJ, Algra A, et al. The  
18 relation between the presence of cardiovascular disease and vascular risk factors in offspring  
19 and the occurrence of new vascular events in their parents already at high vascular risk. *Am*  
20 *Heart J*. 2015;170(4):744-752.e2.  
21  
22  
23  
24 26. Geerlings MI, Appelman APA, Vincken KL, Algra A, Witkamp TD, Mali WPTM, et al. Brain  
25 volumes and cerebrovascular lesions on MRI in patients with atherosclerotic disease. The  
26 SMART-MR study. *Atherosclerosis*. 2010;210(1):130–6.  
27  
28  
29  
30 27. Muller M, Van Der Graaf Y, Algra A, Hendrikse J, Mali WP, Geerlings MI. Carotid  
31 atherosclerosis and progression of brain atrophy: The SMART-MR Study. *Ann Neurol*.  
32 2011;70(2):237–44.  
33  
34  
35 28. Conijn MMA, Kloppenborg RP, Algra A, Mali WPTM, Kappelle LJ, Vincken KL, et al.  
36 Cerebral small vessel disease and risk of death, ischemic stroke, and cardiac complications in  
37 patients with atherosclerotic disease: The second manifestations of arterial disease-magnetic  
38 resonance (SMART-MR) study. *Stroke*. 2011;42(11):3105–9.  
39  
40  
41  
42 29. Kloppenborg RP, Geerlings MI, Visseren FL, Mali WPTM, Vermeulen M, Van Der Graaf Y,  
43 et al. Homocysteine and progression of generalized small-vessel disease :The SMART-MR  
44 study. *Neurology*. 2014;82(9):777–83.  
45  
46  
47 30. Jochemsen HM, Muller M, Visseren FL, Scheltens P, Vincken KL, Mali WP, et al. Blood  
48 pressure and progression of brain atrophy the SMART-MR study. *JAMA Neurol*.  
49 2013;70(8):1046–53.  
50  
51  
52  
53 31. Van Der Veen PH, Muller M, Vincken KL, Hendrikse J, Mali WPTM, Van Der Graaf Y, et al.  
54 Longitudinal Relationship between Cerebral Small-Vessel Disease and Cerebral Blood Flow.  
55 *Stroke*. 2015;46(5):1233–8.  
56  
57  
58 32. Zwartbol MHT, Van Der Kolk AG, Ghaznawi R, Van Der Graaf Y, Hendrikse J, Geerlings MI,  
59 et al. Intracranial Vessel Wall Lesions on 7T MRI (Magnetic Resonance Imaging): Occurrence  
60

- and Vascular Risk Factors: The SMART-MR Study. *Stroke*. 2019;50(1):88–94.
33. Ghaznawi R, Geerlings MI, Jaarsma-Coes M, Hendrikse J, de Bresser J. Association of White Matter Hyperintensity Markers on MRI and Long-term Risk of Mortality and Ischemic Stroke: The SMART-MR Study. *Neurology*. 2021;96(17):e2172–83.
34. Rissanen I, Lucci C, Ghaznawi R, Hendrikse J, Kappelle LJ, Geerlings MI. Association of Ischemic Imaging Phenotype With Progression of Brain Atrophy and Cerebrovascular Lesions on MRI: The SMART-MR Study. *Neurology*. 2021;97(11):e1063–74.
35. Ghaznawi R, Geerlings MI, Jaarsma-Coes MG, Zwartbol MHT, Kuijf HJ, van der Graaf Y, et al. The association between lacunes and white matter hyperintensity features on MRI: The SMART-MR study. *J Cereb Blood Flow Metab*. 2019;39(12):2486–96.
36. Brand N, Jolles J. Learning and Retrieval Rate of Words Presented Auditorily and Visually. *J Gen Psychol*. 1985 Apr 1;112(2):201–10.
37. Osterrieth PA. Le test de copie d'une figure complexe; contribution à l'étude de la perception et de la mémoire. [Test of copying a complex figure; contribution to the study of perception and memory.]. *Arch Psychol (Geneve)*. 1944;30:206–356.
38. Robertson IH, Ward T, Ridgeway V, Nimmo-Smith I. The structure of normal human attention: The Test of Everyday Attention. *J Int Neuropsychol Soc*. 1996 Nov;2(6):525–34.
39. Burgess PW, Shallice T. Bizarre responses, rule detection and frontal lobe lesions. *Cortex*. 1996 Jun;32(2):241–59.
40. Wilkins AJ, Shallice T, McCarthy R. Frontal lesions and sustained attention. *Neuropsychologia*. 1987;25(2):359–65.
41. Schmand B, Geerlings MI, Jonker C, Lindeboom J. Reading ability as an estimator of premorbid intelligence: does it remain stable in emergent dementia? *J Clin Exp Neuropsychol*. 1998 Feb;20(1):42–51.
42. Folstein MF, Folstein SE, McHugh PR. "Mini-mental state". A practical method for grading the cognitive state of patients for the clinician. *J Psychiatr Res*. 1975 Nov;12(3):189–98.
43. Lezak MD, Howieson DB, Loring DW, Fischer JS. *Neuropsychological assessment*. Oxford University Press, USA; 2004.
44. Wechsler D. Wechsler adult intelligence scale. *Arch Clin Neuropsychol*. 1955;
45. Franssens BT, Nathoe HM, Leiner T, Van Der Graaf Y, Visseren FLJ. Relation between cardiovascular disease risk factors and epicardial adipose tissue density on cardiac computed



- 1  
2  
3 tomography in patients at high risk of cardiovascular events. *Eur J Prev Cardiol*.  
4 2017;24(6):660–70.  
5  
6  
7 46. van 't Klooster CC, Nathoe HM, Hjortnaes J, Bots ML, Isgum I, Lessmann N, et al. Multifocal  
8 cardiovascular calcification in patients with established cardiovascular disease; prevalence, risk  
9 factors, and relation with recurrent cardiovascular disease. *IJC Hear Vasc*. 2020;27:100499.  
10  
11  
12 47. Agatston AS, Janowitz WR, Hildner FJ, Zusmer NR, Viamonte MJ, Detrano R. Quantification  
13 of coronary artery calcium using ultrafast computed tomography. *J Am Coll Cardiol*. 1990  
14 Mar;15(4):827–32.  
15  
16  
17 48. Cury RC, Abbara S, Achenbach S, Agatston A, Berman DS, Budoff MJ, et al. Coronary Artery  
18 Disease - Reporting and Data System (CAD-RADS): An Expert Consensus Document of  
19 SCCT, ACR and NASCI: Endorsed by the ACC. *JACC Cardiovasc Imaging*. 2016  
20 Sep;9(9):1099–113.  
21  
22  
23 49. Goessens BMB, Visseren FLJ, de Nooijer J, van den Borne HW, Algra A, Wierdsma J, et al. A  
24 pilot-study to identify the feasibility of an Internet-based coaching programme for changing the  
25 vascular risk profile of high-risk patients. *Patient Educ Couns*. 2008;73(1):67–72.  
26  
27  
28 50. Lafeber M, Grobbee DE, Bots ML, Thom S, Webster R, Rodgers A, et al. The Evening versus  
29 Morning Polypill Utilization Study: The TEMPUS rationale and design. *Eur J Prev Cardiol*.  
30 2014;21(4):425–33.  
31  
32  
33 51. Lafeber M, Grobbee DE, Schrover IM, Thom S, Webster R, Rodgers A, et al. Comparison of a  
34 morning polypill, evening polypill and individual pills on LDL-cholesterol, ambulatory blood  
35 pressure and adherence in high-risk patients; A randomized crossover trial. *Int J Cardiol*.  
36 2015;181:193–9.  
37  
38  
39 52. Goessens BMB, Visseren FLJ, Sol BGM, de Man-Van Ginkel JM, Van Der Graaf Y. A  
40 randomized, controlled trial for risk factor reduction in patients with symptomatic vascular  
41 disease: The multidisciplinary Vascular Prevention by Nurses Study (VENUS). *Eur J Prev*  
42 *Cardiol*. 2006;13(6):996–1003.  
43  
44  
45 53. Sol BGM, van der Graaf Y, Goessens BMB, Visseren FLJ. Social support and change in  
46 vascular risk factors in patients with clinical manifestations of vascular diseases. *Eur J*  
47 *Cardiovasc Nurs* [Internet]. 2009;8(2):137–43. Available from:  
48 <http://dx.doi.org/10.1016/j.ejcnurse.2008.10.005>  
49  
50  
51  
52  
53  
54  
55  
56  
57  
58  
59  
60

STROBE Statement—Checklist of items that should be included in reports of *cohort studies*

|                           | Item No | Recommendation                                                                                                                                                                                                                                                                                                         | Page No |
|---------------------------|---------|------------------------------------------------------------------------------------------------------------------------------------------------------------------------------------------------------------------------------------------------------------------------------------------------------------------------|---------|
| <b>Title and abstract</b> | 1       | (a) Indicate the study's design with a commonly used term in the title or the abstract<br>(b) Provide in the abstract an informative and balanced summary of what was done and what was found                                                                                                                          | 1+3     |
| <b>Introduction</b>       |         |                                                                                                                                                                                                                                                                                                                        |         |
| Background/rationale      | 2       | Explain the scientific background and rationale for the investigation being reported                                                                                                                                                                                                                                   | 5       |
| Objectives                | 3       | State specific objectives, including any prespecified hypotheses                                                                                                                                                                                                                                                       | 5       |
| <b>Methods</b>            |         |                                                                                                                                                                                                                                                                                                                        |         |
| Study design              | 4       | Present key elements of study design early in the paper                                                                                                                                                                                                                                                                | 6       |
| Setting                   | 5       | Describe the setting, locations, and relevant dates, including periods of recruitment, exposure, follow-up, and data collection                                                                                                                                                                                        | 6       |
| Participants              | 6       | (a) Give the eligibility criteria, and the sources and methods of selection of participants. Describe methods of follow-up<br>(b) For matched studies, give matching criteria and number of exposed and unexposed                                                                                                      | 6+11-12 |
| Variables                 | 7       | Clearly define all outcomes, exposures, predictors, potential confounders, and effect modifiers. Give diagnostic criteria, if applicable                                                                                                                                                                               | 6-11    |
| Data sources/measurement  | 8*      | For each variable of interest, give sources of data and details of methods of assessment (measurement). Describe comparability of assessment methods if there is more than one group                                                                                                                                   | 6-11    |
| Bias                      | 9       | Describe any efforts to address potential sources of bias                                                                                                                                                                                                                                                              | 6-12    |
| Study size                | 10      | Explain how the study size was arrived at                                                                                                                                                                                                                                                                              | 6-7     |
| Quantitative variables    | 11      | Explain how quantitative variables were handled in the analyses. If applicable, describe which groupings were chosen and why                                                                                                                                                                                           | 16-17   |
| Statistical methods       | 12      | (a) Describe all statistical methods, including those used to control for confounding<br>(b) Describe any methods used to examine subgroups and interactions<br>(c) Explain how missing data were addressed<br>(d) If applicable, explain how loss to follow-up was addressed<br>(e) Describe any sensitivity analyses | n.a.    |
| <b>Results</b>            |         |                                                                                                                                                                                                                                                                                                                        |         |
| Participants              | 13*     | (a) Report numbers of individuals at each stage of study—eg numbers potentially eligible, examined for eligibility, confirmed eligible, included in the study, completing follow-up, and analysed<br>(b) Give reasons for non-participation at each stage<br>(c) Consider use of a flow diagram                        | 16-17   |
| Descriptive data          | 14*     | (a) Give characteristics of study participants (eg demographic, clinical, social) and information on exposures and potential confounders<br>(b) Indicate number of participants with missing data for each variable of interest<br>(c) Summarise follow-up time (eg, average and total amount)                         | 16-17   |
| Outcome data              | 15*     | Report numbers of outcome events or summary measures over time                                                                                                                                                                                                                                                         | 17-18   |

|    |                          |    |                                                                                                                                                                                                              |       |
|----|--------------------------|----|--------------------------------------------------------------------------------------------------------------------------------------------------------------------------------------------------------------|-------|
| 1  | Main results             | 16 | (a) Give unadjusted estimates and, if applicable, confounder-adjusted estimates and their precision (eg, 95% confidence interval). Make clear which confounders were adjusted for and why they were included | 16-18 |
| 2  |                          |    | (b) Report category boundaries when continuous variables were categorized                                                                                                                                    |       |
| 3  |                          |    | (c) If relevant, consider translating estimates of relative risk into absolute risk for a meaningful time period                                                                                             |       |
| 4  |                          |    |                                                                                                                                                                                                              |       |
| 5  |                          |    |                                                                                                                                                                                                              |       |
| 6  |                          |    |                                                                                                                                                                                                              |       |
| 7  |                          |    |                                                                                                                                                                                                              |       |
| 8  |                          |    |                                                                                                                                                                                                              |       |
| 9  | Other analyses           | 17 | Report other analyses done—eg analyses of subgroups and interactions, and sensitivity analyses                                                                                                               | n.a.  |
| 10 |                          |    |                                                                                                                                                                                                              |       |
| 11 | <b>Discussion</b>        |    |                                                                                                                                                                                                              |       |
| 12 |                          |    |                                                                                                                                                                                                              |       |
| 13 | Key results              | 18 | Summarise key results with reference to study objectives                                                                                                                                                     | 18    |
| 14 | Limitations              | 19 | Discuss limitations of the study, taking into account sources of potential bias or imprecision. Discuss both direction and magnitude of any potential bias                                                   | 19-20 |
| 15 |                          |    |                                                                                                                                                                                                              |       |
| 16 | Interpretation           | 20 | Give a cautious overall interpretation of results considering objectives, limitations, multiplicity of analyses, results from similar studies, and other relevant evidence                                   | 19-20 |
| 17 |                          |    |                                                                                                                                                                                                              |       |
| 18 |                          |    |                                                                                                                                                                                                              |       |
| 19 | Generalisability         | 21 | Discuss the generalisability (external validity) of the study results                                                                                                                                        | 20    |
| 20 |                          |    |                                                                                                                                                                                                              |       |
| 21 | <b>Other information</b> |    |                                                                                                                                                                                                              |       |
| 22 | Funding                  | 22 | Give the source of funding and the role of the funders for the present study and, if applicable, for the original study on which the present article is based                                                | 21    |
| 23 |                          |    |                                                                                                                                                                                                              |       |
| 24 |                          |    |                                                                                                                                                                                                              |       |

\*Give information separately for exposed and unexposed groups.

**Note:** An Explanation and Elaboration article discusses each checklist item and gives methodological background and published examples of transparent reporting. The STROBE checklist is best used in conjunction with this article (freely available on the Web sites of PLoS Medicine at <http://www.plosmedicine.org/>, Annals of Internal Medicine at <http://www.annals.org/>, and Epidemiology at <http://www.epidem.com/>). Information on the STROBE Initiative is available at <http://www.strobe-statement.org>.

# BMJ Open

## Cohort profile: the Utrecht Cardiovascular Cohort – Second Manifestations of Arterial Disease (UCC-SMART) study – an ongoing prospective cohort study of patients at high cardiovascular risk in the Netherlands

|                               |                                                                                                                                                                                                                                                                                                                                                                                                                                                                                                                                                                                                                                                                                                                                                                                                                                                                                                                                                                                                                                                                                                                                                                                                                                                                                                                                                                                                                                                                                                                                                                                                                                                                                                                                                                                                                                                                                    |
|-------------------------------|------------------------------------------------------------------------------------------------------------------------------------------------------------------------------------------------------------------------------------------------------------------------------------------------------------------------------------------------------------------------------------------------------------------------------------------------------------------------------------------------------------------------------------------------------------------------------------------------------------------------------------------------------------------------------------------------------------------------------------------------------------------------------------------------------------------------------------------------------------------------------------------------------------------------------------------------------------------------------------------------------------------------------------------------------------------------------------------------------------------------------------------------------------------------------------------------------------------------------------------------------------------------------------------------------------------------------------------------------------------------------------------------------------------------------------------------------------------------------------------------------------------------------------------------------------------------------------------------------------------------------------------------------------------------------------------------------------------------------------------------------------------------------------------------------------------------------------------------------------------------------------|
| Journal:                      | <i>BMJ Open</i>                                                                                                                                                                                                                                                                                                                                                                                                                                                                                                                                                                                                                                                                                                                                                                                                                                                                                                                                                                                                                                                                                                                                                                                                                                                                                                                                                                                                                                                                                                                                                                                                                                                                                                                                                                                                                                                                    |
| Manuscript ID                 | bmjopen-2022-066952.R1                                                                                                                                                                                                                                                                                                                                                                                                                                                                                                                                                                                                                                                                                                                                                                                                                                                                                                                                                                                                                                                                                                                                                                                                                                                                                                                                                                                                                                                                                                                                                                                                                                                                                                                                                                                                                                                             |
| Article Type:                 | Cohort profile                                                                                                                                                                                                                                                                                                                                                                                                                                                                                                                                                                                                                                                                                                                                                                                                                                                                                                                                                                                                                                                                                                                                                                                                                                                                                                                                                                                                                                                                                                                                                                                                                                                                                                                                                                                                                                                                     |
| Date Submitted by the Author: | 27-Dec-2022                                                                                                                                                                                                                                                                                                                                                                                                                                                                                                                                                                                                                                                                                                                                                                                                                                                                                                                                                                                                                                                                                                                                                                                                                                                                                                                                                                                                                                                                                                                                                                                                                                                                                                                                                                                                                                                                        |
| Complete List of Authors:     | <p>Castelijns, Maria; University Medical Centre Utrecht, Department of Vascular Medicine</p> <p>Helmink, Marga; University Medical Centre Utrecht, Department of Vascular Medicine</p> <p>Hageman, Steven; University Medical Centre Utrecht, Department of Vascular Medicine</p> <p>Asselbergs, Folkert; University Medical Centre Utrecht, Department of Cardiology</p> <p>de Borst, Gert-Jan; University Medical Centre Utrecht, Department of Vascular Surgery</p> <p>Bots, Michiel; University Medical Centre Utrecht, Julius Centre for Health Sciences and Primary Care</p> <p>cramer, maarten jan; University Medical Centre Utrecht, Department of Cardiology</p> <p>Dorresteijn, Jannick; University Medical Centre Utrecht, Department of Vascular Medicine</p> <p>Emmelot-Vonk, Marielle; University Medical Centre Utrecht, Department of Geriatrics</p> <p>Geerlings, Mirjam I; University Medical Centre Utrecht, Julius Center for Health Sciences and Primary Care</p> <p>de Jong, P. A.; University Medical Centre Utrecht, Department of Radiology</p> <p>van der Kaaij, Niels; University Medical Centre Utrecht, Department of Cardiothoracic Surgery</p> <p>Kappelle, Jaap; University Medical Centre Utrecht, Department of Neurology</p> <p>Lely, Titia; Universitair Medisch Centrum Utrecht, Department of Gynaecology and Obstetrics</p> <p>van der Meer, Manon; University Medical Centre Utrecht, Department of Cardiology</p> <p>Mol, Barend; University Medical Centre Utrecht, Department of Vascular Surgery</p> <p>Nathoe, Hendrik; University Medical Centre Utrecht, Department of Cardiology</p> <p>Onland-Moret, N. Charlotte; University Medical Centre Utrecht, Julius Centre for Health Sciences and Primary Care</p> <p>van Petersen, Rutger ; University Medical Centre Utrecht, Julius Centre for Health Sciences and Primary Care</p> |

|                                    |                                                                                                                                                                                                                                                                                                                                                                                                                                                                                                                                                                                                    |
|------------------------------------|----------------------------------------------------------------------------------------------------------------------------------------------------------------------------------------------------------------------------------------------------------------------------------------------------------------------------------------------------------------------------------------------------------------------------------------------------------------------------------------------------------------------------------------------------------------------------------------------------|
|                                    | Ruigrok, Ynte; University Medical Centre Utrecht, Department of Neurology<br>van Smeden, Maarten; University Medical Centre Utrecht<br>Teraa, Martin; University Medical Centre Utrecht, Department of Vascular Surgery<br>Vandersteen, Angela; University Medical Centre Utrecht, Department of Vascular Medicine<br>Verhaar, Marianne; University Medical Centre Utrecht, Department of Nephrology and Hypertension<br>Westerink, Jan; University Medical Centre Utrecht, Department of Vascular Medicine<br>Visseren, Frank; University Medical Centre Utrecht, Department of Vascular Medicine |
| <b>Primary Subject Heading</b> :   | Cardiovascular medicine                                                                                                                                                                                                                                                                                                                                                                                                                                                                                                                                                                            |
| <b>Secondary Subject Heading</b> : | Cardiovascular medicine, Diabetes and endocrinology, Epidemiology                                                                                                                                                                                                                                                                                                                                                                                                                                                                                                                                  |
| <b>Keywords</b> :                  | Vascular medicine < INTERNAL MEDICINE, EPIDEMIOLOGY, PREVENTIVE MEDICINE, General diabetes < DIABETES & ENDOCRINOLOGY                                                                                                                                                                                                                                                                                                                                                                                                                                                                              |
|                                    |                                                                                                                                                                                                                                                                                                                                                                                                                                                                                                                                                                                                    |

SCHOLARONE™  
Manuscripts



I, the Submitting Author has the right to grant and does grant on behalf of all authors of the Work (as defined in the below author licence), an exclusive licence and/or a non-exclusive licence for contributions from authors who are: i) UK Crown employees; ii) where BMJ has agreed a CC-BY licence shall apply, and/or iii) in accordance with the terms applicable for US Federal Government officers or employees acting as part of their official duties; on a worldwide, perpetual, irrevocable, royalty-free basis to BMJ Publishing Group Ltd ("BMJ") its licensees and where the relevant Journal is co-owned by BMJ to the co-owners of the Journal, to publish the Work in this journal and any other BMJ products and to exploit all rights, as set out in our [licence](#).

The Submitting Author accepts and understands that any supply made under these terms is made by BMJ to the Submitting Author unless you are acting as an employee on behalf of your employer or a postgraduate student of an affiliated institution which is paying any applicable article publishing charge ("APC") for Open Access articles. Where the Submitting Author wishes to make the Work available on an Open Access basis (and intends to pay the relevant APC), the terms of reuse of such Open Access shall be governed by a Creative Commons licence – details of these licences and which [Creative Commons](#) licence will apply to this Work are set out in our licence referred to above.

Other than as permitted in any relevant BMJ Author's Self Archiving Policies, I confirm this Work has not been accepted for publication elsewhere, is not being considered for publication elsewhere and does not duplicate material already published. I confirm all authors consent to publication of this Work and authorise the granting of this licence.

1  
2  
3 **1 Cohort profile: the Utrecht Cardiovascular Cohort – Second Manifestations of Arterial Disease**  
4 **(UCC-SMART) study – an ongoing prospective cohort study of patients at high cardiovascular**  
5 **2 risk in the Netherlands**  
6  
7  
8  
9  
10  
11

12 5 Maria C. Castelijns<sup>\*a</sup>, Marga A.G. Helmink<sup>\*a</sup>, Steven H.J. Hageman<sup>a</sup>, Folkert W. Asselbergs<sup>b</sup>, Gert J.  
13 6 de Borst<sup>c</sup>, Michiel L. Bots<sup>d</sup>, Maarten J. Cramer<sup>b</sup>, Jannick A.N. Dorresteijn<sup>a</sup>, Marielle H. Emmelot-  
14 7 Vonke<sup>e</sup>, Mirjam I. Geerlings<sup>d</sup>, Pim A. de Jong<sup>f</sup>, Niels van der Kaaij<sup>g</sup>, L. Jaap Kappelle<sup>h</sup>, A. Titia Lely<sup>i</sup>,  
15 8 Manon G. van der Meer<sup>b</sup>, Barend M. Mol<sup>c</sup>, Hendrik M. Nathoe<sup>b</sup>, N. Charlotte Onland-Moret<sup>d</sup>, Rutger  
16 9 B. van Petersen<sup>d</sup>, Ynte M. Ruigrok<sup>h</sup>, Maarten van Smeden<sup>d</sup>, Martin Teraa<sup>c</sup>, Angela Vandersteen<sup>a</sup>,  
17 10 Marianne C. Verhaar<sup>l</sup>, Jan Westerink<sup>a</sup>, Frank L.J. Visseren<sup>a</sup>  
18  
19  
20  
21  
22  
23  
24  
25

26 12 \* Contributed equally

27  
28 13 <sup>a</sup> Department of Vascular Medicine, University Medical Center Utrecht, Heidelberglaan 100, 3584 CX  
29 14 Utrecht, the Netherlands

30  
31  
32 15 <sup>b</sup> Department of Cardiology, University Medical Center Utrecht, Utrecht, the Netherlands

33  
34 16 <sup>c</sup> Department of Vascular Surgery, University Medical Center Utrecht, the Netherlands

35  
36  
37 17 <sup>d</sup> Julius Center for Health Sciences and Primary Care, University Medical Center Utrecht and Utrecht  
38 18 University, Utrecht, the Netherlands

39  
40  
41 19 <sup>e</sup> Department of Geriatrics, University Medical Center Utrecht, the Netherlands

42  
43  
44 20 <sup>f</sup> Department of Radiology, University Medical Center Utrecht, the Netherlands

45  
46 21 <sup>g</sup> Department of Cardiothoracic Surgery, University Medical Center Utrecht, the Netherlands

47  
48 22 <sup>h</sup> Department of Neurology, University Medical Center Utrecht, the Netherlands

49  
50 23 <sup>i</sup> Department of Gynaecology and Obstetrics, University Medical Center Utrecht, the Netherlands

51  
52 24 <sup>j</sup> Department of Nephrology and Hypertension, University Medical Center Utrecht, the Netherlands

53  
54 25

55  
56 26 Corresponding author: F.L.J. Visseren, e-mail address: [F.L.J.Visseren@umcutrecht.nl](mailto:F.L.J.Visseren@umcutrecht.nl)  
57  
58  
59  
60

1  
2  
3 28 Keywords: cardiovascular disease, risk factor, diabetes mellitus, cohort study, follow up study  
4  
5 29  
6  
7 30 Word count: 5,547  
8  
9  
10  
11  
12  
13  
14  
15  
16  
17  
18  
19  
20  
21  
22  
23  
24  
25  
26  
27  
28  
29  
30  
31  
32  
33  
34  
35  
36  
37  
38  
39  
40  
41  
42  
43  
44  
45  
46  
47  
48  
49  
50  
51  
52  
53  
54  
55  
56  
57  
58  
59  
60

For peer review only



1  
2  
3 31 **Abstract**  
4

5 32 **Purpose:** The Utrecht Cardiovascular Cohort – Second Manifestations of Arterial Disease (UCC-  
6  
7 33 SMART) study is an ongoing prospective single-center cohort study with the aim to assess important  
8  
9 34 determinants and the prognosis of cardiovascular disease progression. This article provides an update of  
10  
11 35 the rationale, design, included patients, measurements and findings from the start in 1996 to date.  
12

13 36 **Participants:** The UCC-SMART study includes patients aged 18-90 years referred to the University  
14  
15 37 Medical Center (UMC) Utrecht, the Netherlands, for management of cardiovascular disease (CVD) or  
16  
17 38 severe cardiovascular risk factors. Since September 1996, a total of 14,830 patients has been included.  
18  
19 39 Upon inclusion, patients undergo a standardized screening program, including questionnaires, vital  
20  
21 40 signs, laboratory measurements, an electrocardiogram, vascular ultrasound of carotid arteries and aorta,  
22  
23 41 ankle-brachial index and ultrasound measurements of adipose tissue, kidney size and intima media  
24  
25 42 thickness. Outcomes of interest are collected through annual questionnaires and adjudicated by an  
26  
27 43 endpoint committee.  
28  
29

30 44 **Findings to date:** By May 2022, the included patients contributed to a total follow-up time of over  
31  
32 45 134,000 person-years. During follow-up, 2,259 patients suffered a vascular endpoint (including non-  
33  
34 46 fatal myocardial infarction, non-fatal stroke and vascular death) and 2,794 all-cause deaths, 943 incident  
35  
36 47 cases of diabetes and 2,139 incident cases of cancer were observed up until January 2020. The UCC-  
37  
38 48 SMART cohort contributed to over 350 articles published in peer-reviewed journals, including  
39  
40 49 prediction models recommended by the 2021 ESC CVD prevention guidelines.  
41  
42

43 50 **Future plans:** The UCC-SMART study guarantees an infrastructure for research in patients at high  
44  
45 51 cardiovascular risk. The cohort will continue to include about 600 patients yearly and follow-up will be  
46  
47 52 ongoing to ensure an up-to-date cohort in accordance with current health care and scientific knowledge.  
48  
49 53 In the near future, UCC-SMART will be enriched by echocardiography, and a food frequency  
50  
51 54 questionnaire at baseline enabling the assessment of associations between nutrition and CVD and  
52  
53 55 diabetes.  
54  
55  
56  
57  
58  
59  
60

1  
2  
3 56 **Strengths and limitations**  
4

- 5 57 • The Utrecht Cardiovascular Cohort – Second Manifestations of Arterial disease (UCC-  
6 58 SMART) study is an ongoing cohort of almost 15,000 patients with various manifestations of  
7  
8 59 CVD and cardiovascular risk factors  
9  
10  
11 60 • The UCC-SMART study covers a long follow-up duration and prospectively captures extensive  
12  
13 61 outcome data in a high cardiovascular risk population  
14  
15 62 • The use of a standardized screening program that includes baseline characteristics, physical  
16 63 examination, laboratory testing and non-invasive imaging provides an extended resource of data  
17  
18 64 for research on cardiovascular disease epidemiology  
19  
20 65 • Limitations of the cohort include measurement of the determinants only at baseline for the  
21  
22 66 majority of patients, and the sparse information on socioeconomic status  
23  
24  
25  
26  
27  
28  
29  
30  
31  
32  
33  
34  
35  
36  
37  
38  
39  
40  
41  
42  
43  
44  
45  
46  
47  
48  
49  
50  
51  
52  
53  
54  
55  
56  
57  
58  
59  
60

## 67 **Introduction**

68 Cardiovascular disease (CVD) is the leading cause of morbidity and mortality worldwide, causing  
69 around one-third of all deaths globally in 2019.[1] Atherosclerosis, the dominant cause of CVD, is  
70 fuelled by multiple mutually reinforcing and co-existing risk factors. Because of the progressive nature  
71 of atherosclerosis, patients with established CVD are at high risk of recurrent CVD and mortality.[2,3]  
72 Treatment of cardiovascular risk factors is known to markedly reduce the risk of new cardiovascular  
73 events.[4,5] Slowing down the process of atherosclerosis by timely identification and treatment of  
74 cardiovascular risk factors is therefore of the utmost importance.

75 In 1996, the Second Manifestations of Arterial Disease (SMART) cohort study was set up enrolling  
76 patients newly referred to the University Medical Center (UMC) Utrecht with clinically manifest CVD  
77 or marked risk factors for atherosclerosis. The study was designed with the aim of determining the  
78 prevalence of concomitant atherosclerotic disease and risk factors, as well as studying the incidence of  
79 future cardiovascular events and its predictors. Furthermore, the SMART study contributes to the  
80 complete and protocolized multidisciplinary care of these high risk patients by integrating a standardized  
81 set of measurements into usual patient care. The rationale and design of the study were previously  
82 published in 1999[6], with the study containing around 600 patients at that time. In 2018, the name of  
83 SMART changed to Utrecht Cardiovascular Cohort (UCC)-SMART. By now, 26 years after enrolment  
84 of the first patient, many baseline measurements have been added, substudies have been initiated, the  
85 study has been linked to national registries and the data have been used in several large (inter)national  
86 collaborations. At the same time, demographic and guideline changes have led to differences in the  
87 baseline characteristics and absolute risk of the patients included in the cohort. The aim of the current  
88 article is to provide an update on the rationale, design, included patients, baseline measurements and  
89 follow-up to date.

## 91 **Cohort description**

92 The UCC-SMART-study is a single-centre prospective cohort study, ongoing in both inclusion and  
93 follow-up, in which patient care and scientific research concerning cardiovascular risk factors and  
94 disease are integrated. This is depicted in Figure 1 and discussed in more detail in the sections below.

95

96 *Study population*

97 Starting from September 1996, patients aged 18 to 80 years referred to the UMC Utrecht, the  
98 Netherlands, for management of CVD or severe risk factors for CVD, have been recruited. Patients with  
99 cerebrovascular disease (CeVD), coronary artery disease (CAD), abdominal aortic aneurysm (AAA),  
100 peripheral artery disease (PAD), renal artery stenosis or one or more of the following cardiovascular  
101 risk factors, if rated as severe, are eligible to be included: hypertension, hyperlipidaemia, diabetes  
102 mellitus, renal insufficiency and a positive family medical history. Patients with a chronic human  
103 immunodeficiency virus infection as a cardiovascular risk-increasing condition or with hypertensive  
104 pregnancy disorders have been included since 2007 and 2012, respectively. Definitions of the inclusion  
105 criteria are listed in Supplementary Table 1. If patients have a history of multiple vascular events or risk  
106 factors, the referral reason (usually the most recent event) is listed as the qualifying inclusion diagnosis  
107 and any comorbidities are also registered. Pregnant women, patients with a short life expectancy and  
108 those insufficiently fluent in Dutch are not eligible.

109 Qualifying patients with CVD and/or risk factors listed above are recruited upon their first visit  
110 to the outpatient clinics and hospital wards of the departments of vascular medicine, internal medicine,  
111 nephrology, neurology, cardiology, cardiac surgery, obstetrics and vascular surgery. From 2021  
112 onwards, the outpatient clinic of the department of geriatric medicine has been added to this list and the  
113 maximum age to be eligible for inclusion has been raised from 80 to 90 years old. In case of a recent  
114 cardiovascular event or intervention as the reason for inclusion, patients are invited after discharge from  
115 the hospital. In such cases, baseline measurements are generally performed more than 30 days after the  
116 acute event. All qualifying patients receive written and oral information about study goals and methods  
117 and are included only after written informed consent to use their data for study goals, the reporting of  
118 incidental findings to their treating physician, indefinite period storage of blood samples for future  
119 research and follow-up through annual questionnaires. In addition, participants can opt in or out to the  
120 following items: retrieval of data from regional and national registries, use of their data in research  
121 collaborations with for-profit organizations, use of coded data and laboratory samples for research  
122 outside the European Union and possible future requests to participate in follow-up studies of UCC-

1  
2  
3 123 SMART. When patients do not consent to any of these additional items, they can still partake in the  
4  
5 124 UCC-SMART study.

6  
7 125

8  
9 126 *Baseline data collection*

10  
11 127 The screening program consists of questionnaires, physical examination, an electrocardiogram (ECG),  
12  
13 128 blood, urine and radiology testing. Except for the questionnaires, to be filled out before the hospital visit,  
14  
15 129 the diagnostic components of the program take place during a one-day visit. An overview of all the  
16  
17 130 variables available in UCC-SMART is provided in Supplementary Table 2. Some measurements have  
18  
19 131 only been collected for or starting from a certain time period (Figure 2 and Supplementary Table 3).

20  
21  
22 132

23  
24 133 *Health questionnaires*

25  
26 134 The questionnaires collect data on medical history including established CVD (CeVD, CAD, AAA and  
27  
28 135 PAD as described in Supplementary Table 4), cardiovascular risk factors, symptoms of CVD (based on  
29  
30 136 the Rose Angina Questionnaire[7]), medication use, family history and lifestyle. For women, a question  
31  
32 137 on the age at menopause (if applicable) is included as well. From 2002 onward, information on obstetric  
33  
34 138 history has been collected including the number of full-term pregnancies, miscarriages (<14 weeks of  
35  
36 139 gestation), preterm deliveries (14 – 32 weeks of gestation), birth weight and pregnancy complications.  
37  
38 140 As of August 2022, a 160-item food frequency questionnaire (FFQ), validated in the Dutch population,  
39  
40 141 has been added to the questionnaires.[8] Recently, these questionnaires have also been sent to people  
41  
42 142 who were included in the UCC-SMART study before August 2022. The results of the questionnaires  
43  
44 143 will follow in 2023.

45  
46 144

47  
48  
49 145 *Physical examination*

50  
51 146 Anthropometric measurements are taken by trained (research) nurses and include body height in  
52  
53 147 centimetres, weight in kilograms and waist and hip circumference in centimetres with patients wearing  
54  
55 148 light clothing and no shoes. Weight and length are used to calculate body mass index in kg/m<sup>2</sup>. Waist  
56  
57 149 circumference is measured horizontally at the midpoint between the iliac crest and lower costal margin  
58  
59 150 and hip circumference is taken at the maximum horizontal circumference around the gluteal muscles.

1  
2  
3 151 The mean of two measurements is calculated. If the two measurements differ by >2 cm, a third is taken  
4  
5 152 and the mean of the closest two is calculated.  
6

7 153 From 1996 up until 1999, office blood pressure was measured using a semiautomatic  
8  
9 154 oscillometric device (Omega 1400; Invivo Research Laboratories Inc., Broken Arrow, OK, USA) every  
10  
11 155 4 minutes for a total of 25 minutes at the right brachial artery in supine position and the mean systolic  
12  
13 156 (SBP) and diastolic blood pressure (DBP) were calculated. From April 1999 until 2015, using a non-  
14  
15 157 random sphygmomanometer (Iso-Stabil 5; Speidel & Keller, Jungingen, Germany), 3 simultaneous  
16  
17 158 measurements with an interval of 30 seconds were taken at both upper arms in upright position and the  
18  
19 159 SBP and DBP of the last two measurements were calculated from the arm yielding the highest values.  
20  
21 160 From 2015 onward, office blood pressure has been measured using an automatic oscillometric device  
22  
23 161 (Microlife WatchBP Office AFIB; Microlife Corp, Widnau, Switzerland). The measurement is  
24  
25 162 performed unattended, in triplicate with an interval of 30 seconds, at both upper arms in supine position  
26  
27 163 after the patient has rested for 30 seconds. The measurements on the arm with the highest blood pressure  
28  
29 164 are recorded and the mean SBP and DBP are calculated.  
30  
31

32 165 In order to calculate the ankle-brachial index (ABI), blood pressure measurements are taken at  
33  
34 166 rest at both upper arms every two minutes whilst the blood pressure is measured at both lower legs. For  
35  
36 167 this, a Falcon Quad 8 MHz Doppler probe (Viasonix, Ra'anana, Israel) is used at a 60° angle at the  
37  
38 168 dorsal pedal and posterior tibial arteries. The ABI is defined for each leg as the highest SBP at the ankle  
39  
40 169 divided by the highest brachial SBP.  
41  
42

43 170

#### 45 171 *Laboratory testing*

46  
47 172 On the day of screening, a venous blood sample is drawn after at least eight hours of fasting to measure  
48  
49 173 glucose, total cholesterol, high-density lipoprotein cholesterol (HDL-C), triglycerides, creatinine,  
50  
51 174 and haemoglobin. Laboratory measurements of fasting insulin, C-reactive protein (CRP) and thyroid  
52  
53 175 stimulating hormone (TSH) were added in 2003 and glycated haemoglobin (HbA1c) and apolipoprotein  
54  
55 176 B (apoB) were added in 2006. Lastly, measurement of lipoprotein(a) was added in June 2020.  
56

57  
58 177 Glucose is measured using an enzymatic colorimetric assay (Beckman Coulter, Brea, CA,  
59  
60 178 USA). Total cholesterol and triglycerides are measured using a commercial enzymatic dry chemistry kit

1  
2  
3 179 (Johnson & Johnson, New Brunswick, NJ, USA) and HDL-C with a commercial enzymatic kit  
4  
5 180 (Boehringer, Mannheim, Germany). Low-density lipoprotein cholesterol (LDL-C) is calculated using  
6  
7 181 the Friedewald formula up to a plasma triglyceride level of 9 mmol/L.[9] Estimated glomerular filtration  
8  
9 182 rate (eGFR) is calculated using the Chronic Kidney Disease Epidemiology Collaboration (CKD-EPI)  
10  
11 183 formula.[10] Spectrophotometry (Abbott Diagnostics, Santa Clara, CA, USA) is used to determine  
12  
13 184 haemoglobin levels. CRP in plasma was initially determined using immunonephelometry  
14  
15 185 (Nephelometer Analyzer BN II, Siemens, The Hague, The Netherlands) and from 2013 in heparin  
16  
17 186 plasma on an AU5811 routine chemistry analyser using turbidimetry (Beckman Coulter, Brea, CA,  
18  
19 187 USA). These types of measurements are strongly correlated ( $r = 0.99$ ) and can therefore be pooled for  
20  
21 188 analyses.[11] Before November 2006, TSH was quantified using a third-generation assay on a Centaur  
22  
23 189 analyser (Bayer, Germany). Since December 2006, TSH has been measured by a third-generation assay  
24  
25 190 on a DXi analyser (Beckman Coulter, Woerden, The Netherlands). Correlation between the two  
26  
27 191 analysers is  $r = 0.9991$  ( $n = 69$ ), with an intercept of  $-0.05$  mU/L (95%CI  $-0.22-0.12$ ) and a slope of  
28  
29 192  $1.04$  (95%CI  $1.029-1.052$ ) (range  $0-95$  mU/L). ApoB and lipoprotein(a) are measured using  
30  
31 193 nephelometry (Atellica Neph 630, Siemens, The Hague, The Netherlands). A morning-void urine  
32  
33 194 sample is collected to determine urine albumin, creatinine, sodium and potassium levels. Urine albumin  
34  
35 195 is measured using immunoturbidimetric assays. Ion selective electrode (Beckman Coulter, Brea, CA,  
36  
37 196 USA) is used to determine urine sodium and potassium levels. DNA can be isolated from 10 mL of  
38  
39 197 EDTA-augmented blood stored at  $-80^{\circ}$  for genotyping.  
40  
41  
42  
43  
44

198

### 199 *Radiology testing*

47 200 Non-invasive vascular imaging testing is performed by specially trained ultrasound technicians. Duplex  
48  
49 201 examination of the carotid arteries is conducted to assess possible stenosis using peak systolic velocity  
50  
51 202 measurements at the brachiocephalic trunk, carotid arteries (mid- and distal common, external and  
52  
53 203 proximal and distal internal) and vertebral arteries (proximal and distal). Measurements are performed  
54  
55 204 using an EPIQ-7 ultrasound machine (Philips Medical Systems, Eindhoven, The Netherlands). In case  
56  
57 205 of abnormal signals and/or retrograde flow in the vertebral arteries, the proximal subclavian arteries are  
58  
59 206 evaluated in search of severe stenosis or occlusion. For research purposes, intima-media-thickness

1  
2  
3 207 (IMT) of the carotid arteries is measured using a linear array transducer. With the patient lying down  
4  
5 208 and the head turned 45° away from the side investigated, the ultrasound frame yielding an optimal  
6  
7 209 longitudinal picture of the common carotid arterial wall is frozen at the time of the R-peak of ECG  
8  
9 210 recording. Over a length of 1 cm starting from the carotid bulb towards proximal direction, the arterial  
10  
11 211 wall thickness is measured from the lumen-intima interface to the media-adventitia interface. The mean  
12  
13 212 of measurements in anterolateral, lateral and posterolateral direction is calculated.

14  
15 213 Abdominal ultrasound examination is performed using the same ultrasound machine to obtain  
16  
17 214 the maximal anterior-posterior diameter of the juxtarenal and infrarenal abdominal aorta and kidney  
18  
19 215 length and volume. As of January 2000, visceral and subcutaneous adipose tissue measurements were  
20  
21 216 added. The amount of subcutaneous fat is estimated by the distance from the linea alba to the skin.  
22  
23 217 Visceral adipose tissue thickness is measured as the distance between the lumbar spine and the  
24  
25 218 peritoneum. Measurements are taken at the end of a quiet expiration on a frozen ultrasound frame at  
26  
27 219 three points on the imaginary transversal line halfway between the iliac crest and lower costal margin:  
28  
29 220 at the midsternal line and 10 cm to the left and right on the transversal line. Each measurement is taken  
30  
31 221 three times and then the mean of the measurements is recorded as the actual thickness. Ultrasonography  
32  
33 222 has been proven a suitable technique to measure intra-abdominal adipose tissue with good  
34  
35 223 reproducibility.[12,13] Moreover, from September 1998 on, a protocolized 12-lead resting ECG has  
36  
37 224 been recorded.

38  
39  
40 225 In the near future, echocardiography will be added to the UCC-SMART program to facilitate  
41  
42 226 research on the presence of heart failure at baseline. Echocardiography will be performed using a Philips  
43  
44 227 Affiniti 70 ultrasound machine (Philips Medical Systems, Andover, MA, USA) by using a specific  
45  
46 228 protocol involving 2-dimensional (2D), M-mode, Doppler, tissue Doppler and 2D speckle tracking  
47  
48 229 (STE) imaging in accordance with the European Association of Cardiovascular Imaging 2016  
49  
50 230 recommendations for chamber quantification.[14] In particular, left ventricular dimensions will be  
51  
52 231 measured in order to calculate the left ventricular mass index.[15] Left ventricular ejection fraction will  
53  
54 232 be assessed quantitatively, preferably with automated three-dimensional imaging or alternatively with  
55  
56 233 the Simpsons biplane method. Left atrial maximal volume and right ventricular dimensions and function  
57  
58 234 will be measured as recommended.[14] Multiple parameters of left ventricular diastolic function will be



1  
2  
3 235 assessed, including pulsed-wave Doppler of the mitral inflow and tissue Doppler imaging of the mitral  
4  
5 236 annulus motion. Left ventricular diastolic function will be evaluated according to current diagnostic  
6  
7 237 algorithms.[16] A minimal of three sequential complexes will be recorded. Standard image analysis will  
8  
9 238 then be performed off-line in accordance with clinical guidelines using Philips IntelliSpace  
10  
11 239 Cardiovascular software and will include 2D STE analysis of the left ventricle and left atrium.

12  
13  
14 240

15  
16 241 *Treatment recommendation*

17  
18 242 After completion of the screening, the findings are assessed by a multidisciplinary team of two medical  
19  
20 243 specialists (internist, cardiologist, neurologist or vascular surgeon). A treatment recommendation is  
21  
22 244 formulated based on current applicable guidelines, according to which patients are already treated by  
23  
24 245 their general practitioner or medical specialist. The screening results and treatment recommendation are  
25  
26 246 reported in a medical letter which is sent to the treating specialist and general practitioner. Patients  
27  
28 247 receive a summary of relevant findings and recommendations.

29  
30 248 Incidental medical findings during the screening are reported to one of the study physicians and  
31  
32 249 if needed, discussed with specialists from the multidisciplinary team. The findings are added to the  
33  
34 250 medical record and sent to the treating specialist or general practitioner for further action.

35  
36  
37 251

38  
39 252 *Follow-up*

40  
41 253 Patients receive annual questionnaires with questions on hospital admissions and outpatient clinic visits,  
42  
43 254 regardless of whether they are still under the care of the UMC Utrecht. In case patients no longer wish  
44  
45 255 to complete the questionnaires, they are asked if they consent to collection of information from their  
46  
47 256 general practitioner. When the replies indicate possible outcome events, additional information is  
48  
49 257 collected through hospital discharge letters and relevant laboratory and radiology examinations. Clinical  
50  
51 258 events of interest include stroke, myocardial infarction, heart failure, AAA rupture, renal insufficiency,  
52  
53 259 vascular interventions, bleeding, diabetes and vascular and non-vascular mortality as defined in  
54  
55 260 Supplementary Table 5. Incident type 2 diabetes has been assessed since July 2006. To assess incident  
56  
57 261 diabetes between 1996 and 2006, a questionnaire was sent to all patients without diabetes at baseline  
58  
59 262 who were included before July 2006. Incident heart failure has been assessed since October 2011. Three

1  
2  
3 263 members from the endpoint committee independently judge reported events. The endpoint committee  
4  
5 264 consists of medical specialists from the recruiting departments. If all three physicians judge differently,  
6  
7 265 the event is discussed with two other physicians from the committee to reach consensus. Secondary  
8  
9 266 outcomes are adjudicated by trained research nurses. As of 2021, diagnoses of dementia and mild  
10  
11 267 cognitive impairment have been added to the annual questionnaire as self-reported diagnoses.  
12  
13  
14 268

#### 15 269 *Data quality and management*

16  
17  
18 270 Data collected in the UCC-SMART program is stored in the electronic medical record of the UMC  
19  
20 271 Utrecht. Blood samples (serum, citrate plasma, EDTA plasma and erythrocytes concentrate aliquots) are  
21  
22 272 stored at -80°C according to the Biobanks Regulations to be found at the UMC Utrecht website  
23  
24 273 (<https://www.umcutrecht.nl/nl/centrale-biobank>). The central biobank of the UMC Utrecht is ISO9001  
25  
26 274 certified (certificate number 2175592). Release of material for future research is reviewed by the UMC  
27  
28 275 Utrecht Biobanks Review Committee.

29  
30 276 Recorded data is downloaded from the electronic medical record and pseudonymized by the  
31  
32 277 data manager who holds the encryption key, only to be accessed after permission of the principal  
33  
34 278 investigator. The UCC-SMART study group periodically performs quality checks for missing values  
35  
36 279 and inconsistencies compared to source documents, or values outside of the range deemed likely.  
37  
38

39 280

#### 40 41 281 *Patient and public involvement*

42  
43 282 Patients were not involved in the study design. Their experiences of burden and required time are  
44  
45 283 considered in the implementation of new components in the program. Relevant findings of the UCC-  
46  
47 284 SMART screening program and corresponding recommendations are sent to the patients. In addition,  
48  
49 285 patients regularly receive a newsletter containing up-to-date facts and figures of the UCC-SMART study  
50  
51 286 and substudies and findings of publications using UCC-SMART data. The UMC Utrecht policies are in  
52  
53 287 line with open science, for opening up the research agenda to societal stakeholders, open research data  
54  
55 288 and open access publications.  
56  
57

58 289

59  
60 290

1  
2  
3 291 *Linkage to other registries*  
4

5 292 Data in the UCC-SMART study can be enriched by collecting data from various registries and  
6  
7 293 organizations, for example to obtain additional information on outcomes and medication use. Some  
8  
9 294 examples of these linkages are described below.  
10

11 295

12  
13 296 *Netherlands Cancer Registry*  
14

15 297 CVD and cancer share many risk factors and pathophysiological mechanisms, including body fat  
16  
17 298 distribution, diet, physical inactivity, smoking, chronic inflammation burden, and oxidative stress.[17]  
18  
19 299 To evaluate the relation between several cardiovascular risk factors and the risk of cancer, the UCC-  
20  
21 300 SMART cohort has been linked to the *Netherlands Comprehensive Cancer Organisation* (IKNL), a  
22  
23 301 nationwide registry receiving notifications of all new cancer diagnoses. By linking the cohort to the  
24  
25 302 national cancer registry repeatedly, with the most recent linkage taking place in 2022, information on  
26  
27 303 cancer incidence and details of cancer types and histopathology was obtained.  
28  
29

30 304

31  
32 305 *Central Agency for Statistics (CBS) Netherlands*  
33

34 306 The UCC-SMART cohort can be linked to the *Central Agency for Statistics* (CBS), also known as  
35  
36 307 *Statistic Netherlands*, which contains data on ICD-10 coded diagnoses and hospital admissions since  
37  
38 308 1996. This allows for, amongst others, collection of endpoints that are not regularly collected in UCC-  
39  
40 309 SMART or have been collected from a later time point, such as heart failure diagnoses. The CBS collects  
41  
42 310 data from all hospitals in the Netherlands and from general practitioner practices affiliated with 'Nivel'  
43  
44 311 healthcare registration, which are a good reflection of the Dutch population.[18,19]  
45  
46

47 312

48  
49 313 *Utrecht Patient Oriented Database (UPOD)*  
50

51 314 The UCC-SMART cohort can be linked to UPOD[20], a database containing electronic patient data  
52  
53 315 from routine clinical care in the UMC Utrecht. This database has been collecting patient characteristics,  
54  
55 316 medication orders, laboratory test results, hospital discharge diagnoses and medical procedures since  
56  
57 317 2000, enabling the addition of baseline and follow-up information to the UCC-SMART study.  
58  
59

60 318

1  
2  
3 319 *Consortia*

4  
5 320 The data collected in UCC-SMART is added to several consortia such as a genetics consortium  
6  
7 321 (GENIUS-CHD[21] on genetics of subsequent coronary heart disease), the Netherlands consortium of  
8  
9 322 dementia cohorts and the Chronic Kidney Disease Prognosis Consortium[22].

10  
11 323

12  
13 324 *Dutch Foundation for Pharmaceutical Statistics*

14  
15 325 A future plan is to obtain information on medication use during follow-up by linking the UCC-  
16  
17 326 SMART cohort to the *Dutch Foundation for Pharmaceutical Statistics (Stichting Farmaceutische*  
18  
19 327 *Kengetallen [SFK])*. This foundation obtains data from over 97% of the community pharmacies in the  
20  
21 328 Netherlands.[23]

22  
23 329

24  
25 330 *Substudies*

26  
27 331 *SMART-2*

28  
29 332 Patients with a history of CVD or diabetes are invited to participate in the SMART-2 substudy. In this  
30  
31 333 study, the baseline measurements of UCC-SMART are repeated in order to investigate the course of  
32  
33 334 atherosclerosis and vascular risk factors over time, and to evaluate the effects of treatment. Until May  
34  
35 335 2022, 2,313 patients have participated in SMART-2 after a median of 9.9 years (IQR 9.2 – 10.8) since  
36  
37 336 their inclusion in UCC-SMART. As with UCC-SMART, the findings of SMART-2 with an  
38  
39 337 accompanying treatment recommendation are communicated to the patient, his or her treating medical  
40  
41 338 specialist and general practitioner.

42  
43 339

44  
45 340 *SMART-ORACLE*

46  
47 341 SMART-ORACLE aims to determine the additional value of contrast-enhanced computed tomography  
48  
49 342 (CT) of the coronary and carotid arteries on top of traditional cardiovascular risk factors in patients with  
50  
51 343 a history of CVD, diabetes or hypertension.[24] The study is still ongoing and has currently been  
52  
53 344 conducted in 1,252 patients.

54  
55 345

56  
57 346 *SMART-MR and SMART Medea*

1  
2  
3 347 SMART-MR and SMART Medea target the investigation of brain changes in patients with CVD using  
4  
5 348 1.5T magnetic resonance imaging (MRI) (and 7T MRI in a subset of patients).[25,26] This study was  
6  
7 349 conducted in 1,309 patients. Amongst others, measurements of the total cerebral blood flow have been  
8  
9 350 performed and characteristics of white matter lesions and microbleeds have been mapped.

10 351

11 352 *Athero-Express*

12  
13  
14  
15 353 In May 2022, the Athero-Express biobank and study cohort have been incorporated into the UCC-  
16  
17 354 SMART study.[27] The objective of Athero-Express is to investigate the value of plaque characteristics  
18  
19 355 in relation to long term cardiovascular events. This ongoing prospective study, initiated in April 2002,  
20  
21 356 includes patients undergoing femoral or carotid endarterectomy. During surgery, the atherosclerotic  
22  
23 357 plaque is harvested and immunohistochemically stained in order to assess fat, collagen, macrophages and  
24  
25 358 smooth muscle cells.

26 359

27 360 *Other substudies*

28  
29  
30 361 Several other substudies have been carried out within the UCC-SMART cohort, providing additional  
31  
32 362 information and parameters for subsets of patients (Supplementary Table 6). As part of **SMART-**  
33  
34 363 **Junior**, additional questionnaires have been sent to 4,270 patients in order to investigate the presence  
35  
36 364 of cardiovascular risk factors and CVD in their offspring.[28] In **DISH**, diffuse idiopathic skeletal  
37  
38 365 hyperostosis was scored on chest X-rays of 4,791 patients, performed in the context of health care, using  
39  
40 366 the Resnick criteria.[29,30] **SMART-HEART** aimed to detect patient characteristics related to the  
41  
42 367 development of left ventricle hypertrophy using 1.5T cardiac MRI in 536 patients with hypertension,  
43  
44 368 but free of known coronary or valvular disease.[31] In order to determine whether intima and media  
45  
46 369 calcification differ in their associated CVD risks and to elucidate which risk factors lead to the  
47  
48 370 development of those types of calcification, CT-scans of the femoral head to the feet have been  
49  
50 371 performed in 520 patients as part of **ARTEMIS**. [32] The aim of the **Small aneurysms trial** was to  
51  
52 372 estimate the overall rupture rates of small AAAs and to investigate demographic characteristics and  
53  
54 373 cardiovascular risk factors for association with AAA growth using ultrasound scanning of the aorta in  
55  
56 374 230 patients with an initial AAA diameter of 30-55 mm.[33] In **Brown adipose tissue**, supraclavicular

1  
2  
3 375 and subcutaneous adipose tissue fat-signal-fractions were assessed in 50 patients with CVD using 1.5T  
4  
5 376 water-fat MRI.[34] **SPAIN** evaluated the feasibility of a web-based coaching program for vascular risk  
6  
7 377 factor treatment, described the patterns of use of this program and measured changes in risk factors in  
8  
9 378 50 patients with CVD.[35] **RULE** investigated the impact of the UCC-SMART study compared to usual  
10  
11 379 care on cardiovascular risk factors in 604 patients with CVD or type 2 diabetes.[36]

12  
13 380 A few clinical trials have been conducted within the UCC-SMART study. **TEMPUS** was a  
14  
15 381 randomized crossover trial in 78 patients that investigated the effects of a cardiovascular polypill on  
16  
17 382 LDL-C, ambulatory blood pressure and adherence as compared to the administration of the individual,  
18  
19 383 identically dosed components of the polypill.[37] **SMART-Inform** was a three-armed randomized  
20  
21 384 controlled trial (RCT) in 303 patients using a statin with CVD.[38] The aim was to determine whether  
22  
23 385 communicating personalized statin therapy-effects leads to lower decisional conflicts associated with  
24  
25 386 statin use compared with standardized (non-personalized) therapy-effects. **BEST** was an RCT  
26  
27 387 investigating whether a clearly written agreement on risk factor management between general  
28  
29 388 practitioners and hospitals improved the vascular risk profile of 197 patients compared with usual  
30  
31 389 care.[39] Another RCT was **VENUS**, which included 236 patients with  $\geq 2$  modifiable risk factors,  
32  
33 390 investigating whether risk factor management in the hospital improved with nurse practitioner care on  
34  
35 391 top of usual care compared with usual care alone.[40] Lastly, **IRIS** was an RCT that evaluated whether  
36  
37 392 an internet-based vascular risk factor management program promoting self-efficacy on top of usual care  
38  
39 393 is more effective than usual care alone in reducing vascular risk factors in 330 patients with CVD.[41]  
40  
41 394 A timeline showing the different substudies is presented in Supplementary Figure 1.  
42  
43  
44  
45  
46

#### 47 396 *Characteristics of the study population*

48  
49 397 By May 2022, a total of 14,830 patients has been included (Figure 3). Of those, 3,294 patients died and  
50  
51 398 89% (n = 10,219) of the surviving patients are still being followed up. Reasons for follow-up to end in  
52  
53 399 surviving patients include withdrawal of participation in further follow-up (80%) or being unreachable  
54  
55 400 for further questionnaires (20%). The median follow-up time of these patients without complete follow-  
56  
57 401 up data is 7.4 years (IQR 3.9 - 11.4). Figure 4 shows the numbers and distribution of the reasons for  
58  
59 402 inclusion. The most common inclusion diagnosis was CAD (n = 4,729), followed by hypertension (n =

1  
2  
3 403 2,344) and CeVD (n = 2,276). PAD was the enrolment diagnosis in 1,173 patients and AAA in 369  
4  
5 404 patients. Hyperlipidaemia was the inclusion diagnosis in 1,433 patients and diabetes mellitus in 730  
6  
7 405 patients.

9 406 Patient characteristics, medication use and measurements at baseline are listed in Table 1. This table  
10  
11 407 is stratified for medical history at baseline, with the items of medical history either being the inclusion  
12  
13 408 diagnosis or a comorbidity. This means that patients may fall within more than one category as listed in  
14  
15 409 Table 1. The majority of patients included in the cohort is male (65%), especially among the subgroup  
16  
17 410 of patients with established CVD (73% male). The mean age of the total population is  $56.8 \pm 12.5$  years.  
18  
19 411 In total, 2,608 individuals (18%) had diabetes and 9,633 individuals (65%) had established CVD at  
20  
21 412 baseline. Of these CVD patients, 1,399 (15%) had polyvascular disease, i.e. multiple vascular beds  
22  
23 413 (cerebral, coronary, abdominal aorta or lower extremity) being affected. The proportion of missing  
24  
25 414 variables is less than 3% for all variables, except for adipose tissue measurements on ultrasound (3.6%),  
26  
27 415 albuminuria (4.7%) and CRP level (9.0%). Vascular screening indicated significant carotid artery  
28  
29 416 stenosis (>50% stenosis) in 526 (4%) patients, AAA in 188 (1%) patients and low ABI ( $\leq 0.9$ ) in 829  
30  
31 417 (6%) patients who were not previously diagnosed with CeVD, AAA or PAD, respectively. Of the 3,095  
32  
33 418 patients with established CVD included between 2012 and 2022 (to account for applicable guidelines),  
34  
35 419 2,075 (67%) had a SBP <140 mmHg, 753 (25%) had an LDL-C  $\leq 1.8$  mmol/L and 2,737 patients (88%)  
36  
37 420 were using antithrombotic agents at baseline. Baseline characteristics of patients with complete follow-  
38  
39 421 up data available were comparable to the characteristics of patients who withdrew from or were  
40  
41 422 unreachable for further follow-up (Supplementary Table 7).  
42  
43  
44  
45  
46  
47  
48  
49  
50  
51  
52  
53  
54  
55  
56  
57  
58  
59  
60

423 *Table 1. Baseline characteristics stratified for medical history*

|                                    | History of CVD          |                         |                           |                           | Cardiovascular risk factors |                              |                                |                     |
|------------------------------------|-------------------------|-------------------------|---------------------------|---------------------------|-----------------------------|------------------------------|--------------------------------|---------------------|
|                                    | Cerebrovascular disease | Coronary artery disease | Abdominal aortic aneurysm | Peripheral artery disease | Hypertension                | Hyperlipidaemia <sup>a</sup> | Diabetes mellitus (type 1 + 2) | Renal insufficiency |
| Number of patients                 | 2801                    | 5999                    | 767                       | 1646                      | 8228                        | 12972                        | 2608                           | 1118                |
| <b>Medical history<sup>a</sup></b> |                         |                         |                           |                           |                             |                              |                                |                     |
| Cerebrovascular disease            | 2801 (100)              | 553 (9)                 | 117 (15)                  | 209 (13)                  | 1655 (20)                   | 2492 (19)                    | 442 (17)                       | 248 (22)            |
| Coronary artery disease            | 553 (20)                | 5999 (100)              | 322 (42)                  | 433 (26)                  | 3192 (39)                   | 5762 (44)                    | 1131 (43)                      | 497 (44)            |
| Abdominal aortic aneurysm          | 117 (4)                 | 322 (5)                 | 767 (100)                 | 134 (8)                   | 466 (6)                     | 693 (5)                      | 114 (4)                        | 151 (14)            |
| Peripheral artery disease          | 209 (7)                 | 433 (7)                 | 134 (17)                  | 1646 (100)                | 906 (11)                    | 1492 (12)                    | 328 (13)                       | 205 (18)            |
| Hypertension                       | 1655 (60)               | 3192 (54)               | 466 (62)                  | 906 (57)                  | 8228 (100)                  | 7285 (57)                    | 1736 (68)                      | 902 (82)            |
| Hyperlipidaemia                    | 2492 (90)               | 5762 (96)               | 693 (91)                  | 1492 (92)                 | 7285 (90)                   | 12972 (100)                  | 2275 (88)                      | 1016 (92)           |
| Diabetes mellitus                  | 442 (16)                | 1131 (19)               | 114 (15)                  | 328 (20)                  | 1736 (21)                   | 2275 (18)                    | 2608 (100)                     | 365 (33)            |
| <b>Health questionnaire</b>        |                         |                         |                           |                           |                             |                              |                                |                     |
| Age (years)                        | 60 ± 11                 | 62 ± 10                 | 65 ± 9                    | 60 ± 11                   | 59 ± 12                     | 58 ± 12                      | 59 ± 12                        | 63 ± 11             |
| Male sex                           | 1744 (62)               | 4849 (81)               | 636 (83)                  | 1100 (67)                 | 5174 (63)                   | 8699 (67)                    | 1815 (70)                      | 911 (82)            |
| Previous or current smoking        | 2106 (76)               | 4511 (75)               | 661 (86)                  | 1473 (90)                 | 5697 (69)                   | 9265 (72)                    | 1865 (72)                      | 847 (76)            |
| Packyears in (former) smokers      | 20.2 (9.4 – 35.1)       | 20.7 (9.4 – 33.6)       | 28.0 (13.8 – 42.3)        | 27.9 (14.6 – 40.6)        | 18.9 (8.3 – 33.3)           | 18.9 (8.8 – 32.5)            | 21.0 (9.5 – 36.2)              | 22.8 (10.5 – 37.8)  |
| Current alcohol use                | 1484 (53)               | 3641 (61)               | 368 (48)                  | 770 (47)                  | 4787 (58)                   | 7584 (59)                    | 1229 (47)                      | 511 (46)            |
| Highest level of education         |                         |                         |                           |                           |                             |                              |                                |                     |
| - Primary/secondary school         | 554 (31)                | 1248 (29)               | 128 (34)                  | 315 (40)                  | 1764 (31)                   | 2569 (29)                    | 553 (35)                       | 210 (32)            |
| - Vocational school                | 631 (35)                | 1466 (35)               | 117 (31)                  | 236 (30)                  | 1824 (32)                   | 2891 (33)                    | 519 (33)                       | 223 (34)            |
| - University (of applied science)  | 560 (31)                | 1415 (33)               | 125 (33)                  | 196 (25)                  | 1914 (34)                   | 3031 (35)                    | 422 (27)                       | 194 (30)            |
| Exercise (METH/week)               | 0.0 (0.0 – 10.5)        | 0.0 (0.0 – 12.0)        | 0 (0.0 – 6.0)             | 0 (0.0 – 5.5)             | 0 (0.0 – 11.0)              | 0 (0.0 – 12.0)               | 0 (0.0 – 6.0)                  | 0 (0.0 – 5.5)       |
| <b>Medication use</b>              |                         |                         |                           |                           |                             |                              |                                |                     |
| Lipid-lowering therapy             | 1682 (60)               | 4995 (83)               | 417 (54)                  | 849 (52)                  | 4720 (57)                   | 8253 (64)                    | 1664 (64)                      | 678 (61)            |
| Antihypertensive therapy           | 1724 (62)               | 5409 (90)               | 545 (71)                  | 912 (55)                  | 7130 (87)                   | 9080 (70)                    | 1980 (76)                      | 965 (86)            |



|                                      |                   |                  |                   |                   |                   |                  |                   |                     |
|--------------------------------------|-------------------|------------------|-------------------|-------------------|-------------------|------------------|-------------------|---------------------|
| Platelet inhibitors                  | 2062 (74)         | 5263 (88)        | 450 (59)          | 987 (60)          | 4532 (55)         | 7694 (59)        | 1453 (56)         | 640 (57)            |
| Oral anticoagulant therapy           | 311 (11)          | 821 (14)         | 123 (16)          | 234 (14)          | 743 (9)           | 1188 (9)         | 271 (10)          | 182 (16)            |
| Glucose lowering therapy             | 287 (10)          | 757 (13)         | 67 (9)            | 189 (11)          | 1176 (14)         | 1475 (11)        | 1621 (62)         | 216 (19)            |
| <b>Anthropometric measurements</b>   |                   |                  |                   |                   |                   |                  |                   |                     |
| Systolic blood pressure (mmHg)       | 141 ± 22          | 137 ± 20         | 142 ± 20          | 144 ± 21          | 150 ± 23          | 140 ± 22         | 144 ± 21          | 150 ± 24            |
| Diastolic blood pressure (mmHg)      | 82 ± 12           | 80 ± 11          | 83 ± 12           | 81 ± 11           | 87 ± 14           | 83 ± 13          | 82 ± 12           | 85 ± 14             |
| Ankle-brachial index $\leq 0.9$      | 398 (14)          | 680 (11)         | 165 (22)          | 1063 (66)         | 1195 (15)         | 1751 (14)        | 434 (17)          | 283 (26)            |
| Body mass index (kg/m <sup>2</sup> ) | 26.6 ± 4.2        | 27.3 ± 4.0       | 26.4 ± 3.8        | 26.3 ± 4.3        | 27.6 ± 4.6        | 27.0 ± 4.3       | 28.7 ± 5.0        | 27 ± 4              |
| Waist circumference (cm)             | 93.7 ± 12.9       | 97.4 ± 11.6      | 97.6 ± 12.1       | 95.0 ± 12.5       | 96.4 ± 13.3       | 95.1 ± 12.7      | 100.7 ± 13.7      | 98.9 ± 12.5         |
| Hip circumference (cm)               | 103.6 ± 8.7       | 104.2 ± 7.6      | 103.8 ± 7.8       | 103.0 ± 8.7       | 105.1 ± 9.2       | 104.1 ± 8.5      | 106.3 ± 9.8       | 104.4 ± 8.4         |
| Visceral fat (cm)                    | 8.6 ± 2.6         | 9.3 ± 2.6        | 9.5 ± 2.6         | 9.2 ± 2.7         | 9.0 ± 2.8         | 8.8 ± 2.7        | 10.1 ± 2.9        | 9.9 ± 2.8           |
| Subcutaneous fat (cm)                | 2.5 ± 1.2         | 2.4 ± 1.2        | 2.2 ± 1.1         | 2.4 ± 1.5         | 2.6 ± 1.4         | 2.5 ± 1.3        | 2.4 ± 1.4         | 2.2 ± 1.4           |
| Carotid artery stenosis              | 652 (24)          | 443 (8)          | 84 (11)           | 255 (16)          | 77 (10)           | 1104 (9)         | 283 (11)          | 181 (16)            |
| cIMT (mm)                            | 0.9 (0.7 – 1.0)   | 0.9 (0.7 – 1.0)  | 0.9 (0.8 – 1.1)   | 0.9 (0.8 – 1.1)   | 0.8 (0.7 – 1.0)   | 0.8 (0.7 – 1.0)  | 0.9 (0.7 – 1.0)   | 0.9 (0.8 – 1.1)     |
| Aortic aneurysm                      | 81 (3)            | 244 (4)          | 307 (41)          | 72 (4)            | 289 (4)           | 458 (4)          | 61 (2)            | 108 (10)            |
| Kidney size (cm)                     | 11.1 ± 1.0        | 11.3 ± 1.0       | 11.3 ± 1.0        | 11.2 ± 1.1        | 11.2 ± 1.0        | 11.2 ± 1.0       | 11.5 ± 1.0        | 10.9 ± 1.3          |
| <b>Laboratory measurements</b>       |                   |                  |                   |                   |                   |                  |                   |                     |
| Haemoglobin (mmol/L)                 | 8.9 ± 0.8         | 8.9 ± 0.8        | 8.8 ± 0.9         | 8.9 ± 0.9         | 8.9 ± 0.8         | 8.9 ± 0.8        | 8.8 ± 0.9         | 8.5 ± 1.0           |
| Total cholesterol (mmol/L)           | 4.9 ± 1.2         | 4.5 ± 1.1        | 5.1 ± 1.3         | 5.3 ± 1.3         | 5.0 ± 1.3         | 5.1 ± 1.4        | 4.7 ± 1.3         | 5.0 ± 1.4           |
| LDL-C (mmol/L)                       | 2.9 ± 1.1         | 2.6 ± 0.9        | 3.1 ± 1.1         | 3.2 ± 1.1         | 2.9 ± 1.1         | 3.1 ± 1.2        | 2.7 ± 1.0         | 2.9 ± 1.1           |
| HDL-C (mmol/L)                       | 1.3 ± 0.4         | 1.2 ± 0.3        | 1.2 ± 0.4         | 1.2 ± 0.4         | 1.3 ± 0.4         | 1.3 ± 0.4        | 1.2 ± 0.3         | 1.2 ± 0.4           |
| Apolipoprotein B (g/L)               | 0.8 ± 0.3         | 0.8 ± 0.2        | 0.9 ± 0.2         | 0.9 ± 0.3         | 0.9 ± 0.3         | 0.9 ± 0.3        | 0.9 ± 0.3         | 0.9 ± 0.3           |
| Triglycerides (mmol/L)               | 1.3 (0.9 – 1.9)   | 1.4 (1.0 – 2.0)  | 1.5 (1.1 – 2.1)   | 1.5 (1.1 – 2.3)   | 1.4 (1.0 – 2.1)   | 1.4 (1.0 – 2.1)  | 1.6 (1.1 – 2.4)   | 1.7 (1.2 – 2.5)     |
| HbA1c (mmol/mol)                     | 38 (36 – 42)      | 39 (36 – 43)     | 39 (36 – 43)      | 40 (37 – 48)      | 39 (36 – 44)      | 38 (36 – 43)     | 52 (45 – 62)      | 41 (37 – 52)        |
| Fasting glucose (mmol/L)             | 5.7 (5.3 – 6.3)   | 5.9 (5.4 – 6.6)  | 5.8 (5.4 – 6.5)   | 5.8 (5.3 – 6.7)   | 5.8 (5.4 – 6.6)   | 5.8 (5.3 – 6.4)  | 8.1 (6.9 – 10.0)  | 6.0 (5.5 – 7.2)     |
| eGFR (mL/min/1.73 m <sup>2</sup> )   | 48 ± 40           | 63 ± 34          | 58 ± 32           | 51 ± 40           | 49 ± 40           | 54 ± 40          | 55 ± 41           | 40 ± 26             |
| Albuminuria (mg/L)                   | 10.0 (6.0 – 24.1) | 9.0 (6.0 – 20.0) | 12.9 (8.0 – 39.9) | 11.0 (7.0 – 32.0) | 11.0 (7.0 – 29.0) | 9.0 (6.0 – 22.0) | 14.0 (8.0 – 41.0) | 82.0 (16.0 – 257.6) |
| CRP (mg/L)                           | 2.1 (1.0 – 4.5)   | 1.9 (1.0 – 4.0)  | 3.3 (1.6 – 6.9)   | 3.1 (1.4 – 6.3)   | 2.2 (1.0 – 4.7)   | 2.0 (1.0 – 4.2)  | 2.4 (1.1 – 5.1)   | 3.2 (1.5 – 7.2)     |
| TSH (mU/L)                           | 1.7 (1.2 – 2.5)   | 1.7 (1.2 – 2.5)  | 1.7 (1.2 – 2.5)   | 1.7 (1.2 – 2.5)   | 1.8 (1.2 – 2.6)   | 1.8 (1.2 – 2.5)  | 1.9 (1.3 – 2.7)   | 1.8 (1.3 – 2.7)     |

1  
2  
3 424 Data are presented as number (percentage), mean  $\pm$  standard difference or median (interquartile range).  
4

5 425 <sup>a</sup> Based on inclusion diagnosis, items of the health questionnaire and/or measurements at baseline:

6 426 Cerebrovascular disease: history of stroke, carotid surgery or percutaneous transluminal angioplasty;  
7

8 427 Coronary artery disease: history of myocardial infarction, cardiac arrest, coronary bypass surgery or percutaneous transluminal coronary angioplasty;  
9

10 428 Abdominal aortic aneurysm: history of abdominal aortic aneurysm, transluminal or surgical treatment of abdominal aortic aneurysm;

11 429 Peripheral artery disease: history of amputation of (part of) lower limb, lower limb peripheral artery surgery or percutaneous transluminal angioplasty;  
12

13 430 Hypertension: treatment with antihypertensive drugs or blood pressure  $\geq 160/95$  mmHg at baseline measurement;

14 431 Hyperlipidaemia: treatment with lipid-lowering agents, total cholesterol  $\geq 5$  mmol/L or LDL-cholesterol  $\geq 3.2$  mmol/L at baseline measurement;

15 432 Diabetes mellitus: treatment with antidiabetic agents, fasting glucose  $\geq 7.0$  mmol/L or non-fasting glucose  $\geq 11.1$  mmol/L at baseline measurement;

16 433 Renal insufficiency: creatinine  $> 120$  mmol/L and/or microprotein/creatinine ratio in urine  $> 20$ .  
17

18 434 Cut-off values applied at the start of UCC-SMART study, please note target values have changed over time and continuous variable are available.  
19

20 435 cIMT, carotid intima media thickness; CRP, C-reactive protein; CVD, cardiovascular disease; eGFR, estimated glomerular filtration rate; HbA1c, glycosylated haemoglobin  
21

22 436 type A1C; HDL-C, high-density lipoprotein cholesterol; LDL-C, low-density lipoprotein cholesterol; MET, metabolic equivalent of task; TSH: thyroid stimulation hormone.  
23  
24  
25  
26  
27  
28  
29  
30  
31  
32  
33  
34  
35  
36  
37  
38  
39  
40  
41  
42  
43  
44  
45  
46

1  
2  
3 437 **Findings to date**  
4

5 438 The findings of this section are reported for patients included up to January 2020 (n = 13,898), because  
6  
7 439 the collection and processing of outcome events has been completed up until this date. These patients  
8  
9 440 contributed to a total follow-up time of 134,439 person-years. Median follow-up time was 9.2 years  
10  
11 441 (interquartile range 4.8 – 14.1 years). During follow-up, 2,259 (16%) patients suffered a first combined  
12  
13 442 major cardiovascular endpoint (including non-fatal myocardial infarction, non-fatal stroke or  
14  
15 443 cardiovascular death). Furthermore, there were 943 (7%) cases of incident diabetes, 105 (1%) cases of  
16  
17 444 end-stage kidney disease, 161 (1%) cases of heart failure and 434 (3%) cases of major bleeding. A total  
18  
19 445 of 3,264 (23%) patients underwent a vascular intervention during follow-up. Of patients with established  
20  
21 446 CVD, 1,906 patients (21%) suffered the combined vascular endpoint mentioned above as subsequent  
22  
23 447 event, whereas 353 patients (7%) with severe risk factors without prior CVD experienced this combined  
24  
25 448 outcome as their first ever event. Of the 2,450 individuals with diabetes at baseline, 568 (23%)  
26  
27 449 individuals suffered the combined vascular endpoint. Corresponding incidence rates are 21.2 per 1000  
28  
29 450 person years for patients with established CVD and 8.2 per 1000 person years for patients without a  
30  
31 451 history of CVD. Numbers and observed incidence rates of all specific outcome events of interest are  
32  
33 452 listed in Table 2. Through linkage with the Dutch National Cancer Registry, a total of 2,139 patients  
34  
35 453 (15%) was diagnosed with cancer during follow-up. This includes 414 diagnoses of lung cancer, 354 of  
36  
37 454 prostate cancer, 294 of intestinal cancer and 163 of breast cancer as most common diagnoses.  
38  
39  
40  
41  
42  
43  
44  
45  
46  
47  
48  
49  
50  
51  
52  
53  
54  
55  
56  
57  
58  
59  
60

456 Table 2. Number and incidence rates of outcome events from 1996 to 2020

| Outcome event                          | Number of first events | Person-years of follow-up | Incidence rate per 1,000 person-years |
|----------------------------------------|------------------------|---------------------------|---------------------------------------|
| <b>Non-fatal stroke</b>                | 613                    | 131,684                   | 4.66                                  |
| Ischemic stroke                        | 502                    | 132,042                   | 3.80                                  |
| Haemorrhagic infarction                | 20                     | 134,362                   | 0.15                                  |
| Intracerebral haemorrhage              | 66                     | 134,285                   | 0.49                                  |
| Subarachnoid haemorrhage               | 17                     | 134,322                   | 0.13                                  |
| Type not determined                    | 8                      | 134,430                   | 0.06                                  |
| <b>Retinal syndromes</b>               | 16                     | 134,338                   | 0.12                                  |
| Infarction                             | 13                     | 134,353                   | 0.10                                  |
| Haemorrhage                            | 3                      | 134,424                   | 0.02                                  |
| <b>Non-fatal myocardial infarction</b> | 793                    | 130,065                   | 6.10                                  |
| <b>Heart failure</b>                   | 161                    | 134,075                   | 1.20                                  |
| Systolic heart failure, due to         | 115                    | 134,203                   | 0.86                                  |
| coronary disease                       | 85                     | 134,266                   | 0.63                                  |
| valve disorders                        | 11                     | 134,425                   | 0.08                                  |
| other causes                           | 19                     | 134,390                   | 0.14                                  |
| HFpEF, due to                          | 46                     | 134,311                   | 0.34                                  |
| coronary disease                       | 15                     | 134,390                   | 0.11                                  |
| valve disorders                        | 8                      | 134,418                   | 0.06                                  |
| other causes                           | 23                     | 134,381                   | 0.17                                  |
| <b>Non-fatal rupture AAA</b>           | 5                      | 139,895                   | 0.04                                  |
| <b>End-stage kidney disease</b>        | 105                    | 134,118                   | 0.78                                  |
| <b>Vascular intervention</b>           | 3,264                  | 110,154                   | 29.6                                  |
| Heart                                  | 1606                   | 121,936                   | 13.2                                  |
| Carotid or intracranial arteries       | 240                    | 132,611                   | 1.81                                  |
| Aorta                                  | 439                    | 131,553                   | 3.34                                  |
| Peripheral arteries                    | 953                    | 127,914                   | 7.45                                  |
| Renal artery                           | 62                     | 133,970                   | 0.46                                  |
| <b>Major bleeding</b>                  |                        |                           |                                       |
| ISTH major bleeding                    | 434                    | 129,804                   | 3.34                                  |
| BARC 3 or 5 bleeding                   | 457                    | 132,497                   | 3.45                                  |
| <b>Incident diabetes</b>               | 943                    | 124,310                   | 7.59                                  |
| Type 1 diabetes                        | 1                      | 131,417                   | 0.01                                  |
| Type 2 diabetes                        | 942                    | 124,330                   | 7.58                                  |

|                                    |       |         |       |
|------------------------------------|-------|---------|-------|
| <b>Vascular mortality</b>          | 1,267 | 134,439 | 9.42  |
| Fatal cerebral infarction          | 85    |         | 0.63  |
| Fatal cerebral haemorrhage         | 65    |         | 0.48  |
| Fatal stroke – type not determined | 21    |         | 0.16  |
| Fatal myocardial infarction        | 63    |         | 0.47  |
| Fatal heart failure                | 198   |         | 1.47  |
| Fatal rupture AAA                  | 29    |         | 0.22  |
| Sudden death                       | 401   |         | 2.98  |
| Other                              | 405   |         | 3.01  |
| <b>Non-vascular mortality</b>      | 1317  | 134,439 | 9.80  |
| Fatal malignancy                   | 800   |         | 5.95  |
| Fatal infection                    | 169   |         | 1.26  |
| Unnatural death                    | 58    |         | 0.43  |
| Other                              | 290   |         | 2.16  |
| <b>All-cause mortality</b>         | 2,794 | 134,439 | 20.78 |
| <b>Malignancy<sup>a</sup></b>      | 2,139 | 127,514 | 16.77 |
| Lung                               | 414   |         | 3.25  |
| Prostate                           | 354   |         | 2.78  |
| Breast                             | 163   |         | 1.28  |
| Intestinal                         | 294   |         | 2.31  |
| Other                              | 914   |         | 7.17  |

457 <sup>a</sup> Other subtypes of cancer in the dataset include cancer of the lip, oral cavity or pharynx; oesophagus; stomach;  
 458 liver, intrahepatic bile ducts, or gallbladder; pancreas; respiratory tract; thymus; bone or articular cartilage of  
 459 limb; melanoma; mesothelial or soft tissue; vulva or vagina; cervix uteri or corpus uteri; ovary; penis or testes;  
 460 kidney, renal pelvis or ureter; bladder; eye, brain, and other parts of the central nervous system; thyroid gland;  
 461 lymphatic/hematopoietic.  
 462  
 463 AAA, abdominal aortic aneurysm; BARC, Bleeding Academic Research Consortium; HFpEF, heart failure with  
 464 preserved ejection fraction; ISTH, International Society on Thrombosis and Haemostasis.

1  
2  
3 465 The large database of observational data has been used for over 350 etiological and prognostic  
4  
5 466 studies so far, and the coverage of a wide age range and long follow-up provides opportunity to develop  
6  
7 467 and validate prediction models. This has been done with the SMART risk score[42,43], the SMART-  
8  
9 468 REACH lifetime model for patients with previous CVD[3] and the DIAL lifetime model[44] for patients  
10  
11 469 with type 2 diabetes (to be found at <https://u-prevent.com> and the ESC ‘CVD risk calculation’-app).  
12  
13 470 These estimates serve clinical practice by providing insight into risk and thus supporting patient  
14  
15 471 education and shared decision making. Moreover, routinely collection of patient data allows for  
16  
17 472 embedding clinical trials within the cohort, as has been done with, amongst others, TEMPUS[37] and  
18  
19 473 SMART-Inform[38].

22 474 The vascular screening in the UCC-SMART study is a structured uniform program to detect risk  
23  
24 475 factors and asymptomatic atherosclerosis and provides a basis for optimizing treatment of high-risk  
25  
26 476 patients. In a previous study comparing the UCC-SMART screening program to usual care in another  
27  
28 477 university hospital in the Netherlands, a beneficial effect of the screening program on SBP and LDL-C  
29  
30 478 was seen.[36] Previous research on screening programs in the general population shows improvement  
31  
32 479 of cardiovascular risk factors and detection of patients at risk, but conflicting results are found on  
33  
34 480 mortality and cardiovascular events.[2,45] In a population at risk (e.g. with hypertension or diabetes),  
35  
36 481 the beneficial effect of cardiovascular screening is more pronounced.[2,46] In addition, a higher baseline  
37  
38 482 achievement of secondary prevention targets is associated with improved cardiovascular health  
39  
40 483 outcomes in patients with established CVD and type 2 diabetes.[47]

43 484

#### 45 485 **Strengths and limitations**

47 486 The UCC-SMART study is a unique ongoing prospective cohort study in over 14,000 patients with a  
48  
49 487 history of various manifestations of CVD or severe cardiovascular risk factors, providing a large up-to-  
50  
51 488 date cohort of a population at high cardiovascular risk. Collecting diverse outcome events in this  
52  
53 489 population allows for research on risk factors for different manifestations of CVD and incident diabetes.  
54  
55 490 Linkage to multiple registries facilitates the investigation of relationships between cardiovascular risk  
56  
57 491 factors and diseases and other conditions such as cancer and dementia. By the integration of health care  
58  
59 492 and scientific research, patient care becomes more complete and data already to be collected for patient

1  
2  
3 493 care is used to increase knowledge of CVD, whilst the additive burden for participating patients is  
4  
5 494 limited.

6  
7 495 The main strengths of the UCC-SMART cohort include the large size, its capture of a high-risk  
8  
9 496 population with various CVD manifestations and risk factors with few exclusion criteria, the use of a  
10  
11 497 standardized diagnostic protocol, the long follow-up duration and the comprehensive capture of a wide  
12  
13 498 range of data. Because inclusion of patients is still ongoing, the UCC-SMART cohort provides a good  
14  
15 499 representation of the past and current population of patients at high cardiovascular risk. Due to the high  
16  
17 500 risk study population, the prevalence and incidence of the main outcome variables are higher than in the  
18  
19 501 general population, thereby increasing the power to study these outcomes. Furthermore, all outcome  
20  
21 502 events are adjudicated independently by three physicians of the endpoint committee, reducing the risk  
22  
23 503 of misclassification. The proportion of missing data is small, possibly explained by the protocolized  
24  
25 504 screening program taking place in one day. The substudies provide additional information on specific  
26  
27 505 cardiovascular risk factors (e.g. parental history of CVD[48], characteristics related to left ventricle  
28  
29 506 hypertrophy[31], and the presence of diffuse idiopathic skeletal hyperostosis[49]), manifestations of  
30  
31 507 atherosclerosis (e.g. brain changes on MRI[25] and cognitive decline[26]), and other important aspects  
32  
33 508 in cardiovascular risk management (e.g. the effect of a cardiovascular polypill[50]).

34  
35  
36 509 Limitations also need to be considered. Due to the prospective observational design, for the  
37  
38 510 majority of the patients, risk factors and medication use are only recorded at baseline and may have  
39  
40 511 changed during follow-up. This could be reflected by the finding of this article that not all patients with  
41  
42 512 CVD meet treatment goals for modifiable risk factors at baseline. Since patients are included several  
43  
44 513 weeks to months after an index CVD event, risk factors are likely to be further optimized during this  
45  
46 514 period after baseline examination. For a subset of patients with CVD or diabetes, a repeat of the baseline  
47  
48 515 measurements after a median of 9.9 years is indeed available, allowing for investigating the course of  
49  
50 516 atherosclerosis over time. Furthermore, in 10.6% of the included patients, follow-up ended due to either  
51  
52 517 withdrawal of participation in further follow-up (8.5%) or being unreachable for further questionnaires  
53  
54 518 (2.1%). Yet, the median follow-up time for these patients is 7.4 years, so those patients still contribute  
55  
56 519 to a fair amount of patient-years. In addition, because UCC-SMART is a single-center study in a  
57  
58 520 university hospital, it can be disputed whether it represents the general high risk population and patients

1  
2  
3 521 with established CVD. The UMC Utrecht provides care to nationwide patients referred for complex and  
4  
5 522 specialized care, but also to patients referred by general practitioners from the region. Patients included  
6  
7 523 in UCC-SMART correspond to patients with severe cardiovascular risk factors or established CVD from  
8  
9 524 the general population. As reflected by the inclusion criteria, the UCC-SMART study does not include  
10  
11 525 patients requiring highly specialized care (including heart transplantation and rare causes of vascular  
12  
13 526 disease). Lastly, except for information on education level, the database does not contain extensive  
14  
15 527 information on socioeconomic status.

16  
17  
18 528 In conclusion, we have provided an updated extensive overview of the design of the UCC-  
19  
20 529 SMART study as well as an overview of the findings to date. This underlines the value of the UCC-  
21  
22 530 SMART study as a basis for contemporary and future epidemiologic research in CVD using a well-  
23  
24 531 characterized high risk cardiovascular population with long-term follow-up. A future goal is to make  
25  
26 532 the UCC-SMART data Findable, Accessible, Interoperable and Reusable (FAIR).[51]  
27

28 533

### 30 534 **Acknowledgements**

31  
32 535 We gratefully acknowledge the contribution of the participants, the research nurses, R. van Petersen  
33  
34 536 (data-manager), A. Vandersteen (study manager), the founders of the SMART-study in 1996: A. Algra,  
35  
36 537 J.D. Banga, B.C. Eikelboom and Y. van der Graaf, and the members of the UCC-SMART study group:  
37  
38 538 M.J. Cramer, H.M. Nathoe and M.G. van der Meer (co-PI), Department of Cardiology; G.J. de Borst  
39  
40 539 and M. Teraa (co-PI), Department of Vascular Surgery; M.L. Bots and M. van Smeden, Julius Center  
41  
42 540 for Health Sciences and Primary Care; M.H. Emmelot-Vonk, Department of Geriatrics; P.A. de Jong,  
43  
44 541 Department of Radiology; A.T. Lely, Department of Gynaecology and Obstetrics; N.P. van der Kaaij,  
45  
46 542 Department of Cardiothoracic Surgery; L.J. Kappelle and Y.M. Ruigrok, Department of Neurology;  
47  
48 543 M.C. Verhaar, Department of Nephrology & Hypertension; J.A.N. Dorresteijn (co-PI) and F.L.J.  
49  
50 544 Visseren (PI), Department of Vascular Medicine, UMC Utrecht.

51 545

### 55 546 **Contributors**

56  
57 547 F.L.J.V., J.W., S.H.J.H., M.C.C. and M.A.G.H. contributed to the conception and design of the work.  
58  
59 548 M.A.G.H. and M.C.C. drafted the manuscript and contributed equally to this paper. M.C.C., M.A.G.H.,  
60



1  
2  
3 549 S.H.J.H., F.W.A., G.J.B., M.L.B., M.J.C., J.A.N.D., M.H.E-V., M.I.G., P.A.J., N.K., J.K., A.T.L.,  
4  
5 550 M.G.M., B.M.M., H.M.N., C.O.-M., R.B.P., Y.M.R., M.S., M.T., A.V., M.C.V., J.W. and F.L.J.V  
6  
7 551 contributed to the interpretation of data and critically revised the manuscript. All gave final approval  
8  
9 552 and agreed to be accountable for all aspects of work ensuring integrity and accuracy.  
10

11 553

#### 12 554 **Funding**

15 555 The UCC-SMART study was financially supported by the UMC Utrecht, the Netherlands. The  
16  
17 556 supporting sources had no involvement in study design, analysis, interpretation, writing of the results,  
18  
19 557 or the decision to submit for publication.  
20

21 558

#### 22 559 **Competing interests**

23  
24 560 None declared.  
25

26 561

#### 27 562 **Patient consent for publication**

28  
29 563 Not applicable.  
30

31 564

#### 32 565 **Ethics approval**

33  
34 566 The study is in accordance with the Helsinki declaration and the Good Clinical Practice guidelines,  
35  
36 567 and is approved by the ethics committee of the UMC Utrecht in 1996, 2014 and 2022 (reference  
37  
38 568 number 22-088).  
39

40 569

#### 41 570 **Data availability statement**

42  
43 571 The UCC-SMART study group directs the academic focus of research using the UCC-SMART data and  
44  
45 572 consists of members from both epidemiological and clinical cardiovascular research. Datasets are  
46  
47 573 provided to interested researchers after approval of request by the UCC-SMART study group. Access  
48  
49 574 to the data request module can be applied for via [ucc-smart@umcutrecht.nl](mailto:ucc-smart@umcutrecht.nl).  
50

51 575

576 **References**

- 577 [1] Roth GA, Mensah GA, Johnson CO, Addolorato G, Ammirati E, Baddour LM, et al. Global  
578 Burden of Cardiovascular Diseases and Risk Factors, 1990-2019: Update From the GBD 2019  
579 Study. *J Am Coll Cardiol.* 2020;76(25):2982–3021.
- 580 [2] Visseren FLJ, Mach F, Smulders YM, Carballo D, Koskinas KC, Bäck M, et al. 2021 ESC  
581 Guidelines on cardiovascular disease prevention in clinical practice. *Eur J Prev Cardiol.*  
582 2022;29(1):5–115.
- 583 [3] Kaasenbrood L, Bhatt DL, Dorresteijn JAN, Wilson PWF, D’Agostino RB, Massaro JM, et al.  
584 Estimated life expectancy without recurrent cardiovascular events in patients with vascular  
585 disease: The SMART-REACH model. *J Am Heart Assoc.* 2018;7(16).
- 586 [4] Adler A, Agodoa L, Algra A, Asselbergs FW, Beckett NS, Berge E, et al. Pharmacological  
587 blood pressure lowering for primary and secondary prevention of cardiovascular disease across  
588 different levels of blood pressure: an individual participant-level data meta-analysis. *Lancet.*  
589 2021;397(10285):1625–36.
- 590 [5] Collins R, Reith C, Emberson J, Armitage J, Baigent C, Blackwell L, et al. Interpretation of the  
591 evidence for the efficacy and safety of statin therapy. *Lancet.* 2016;388(10059):2532–61.
- 592 [6] Simons PCG, Algra A, Van De Laak MF, Grobbee DE, Van Der Graaf Y. Second  
593 manifestations of ARterial disease (SMART) study: Rationale and design. *Eur J Epidemiol.*  
594 1999;15(9):773–81.
- 595 [7] Rose GA, Blackburn H. Cardiovascular survey methods. *Monogr Ser World Health Organ.*  
596 1968;56:1–188.
- 597 [8] Sluik D, Geelen A, De Vries JHM, Eussen SJPM, Brants HAM, Meijboom S, et al. A national  
598 FFQ for the Netherlands (the FFQ-NL 1.0): Validation of a comprehensive FFQ for adults. *Br J*  
599 *Nutr.* 2016;116(5):913–23.
- 600 [9] Tremblay AJ, Morrissette H, Gagné JM, Bergeron J, Gagné C, Couture P. Validation of the  
601 Friedewald formula for the determination of low-density lipoprotein cholesterol compared with  
602  $\beta$ -quantification in a large population. *Clin Biochem.* 2004;37(9):785–90.
- 603 [10] Levey AS, Stevens LA, Schmid CH, Zhang Y, Castro AF, Feldman HI, et al. A new equation

- 1  
2  
3 604 to estimate glomerular filtration rate. *Ann Intern Med.* 2009;150(9):604–12.
- 4  
5 605 [11] Kusnierz-Cabala B, Gernand W, Zabek-Adamska A, Tokarz A, Naskalski JW. Comparison of  
6  
7 606 high-sensitivity C-reactive protein serum assay results obtained using Dade-Behring BNII  
8  
9 607 nephelometer and Ortho Vitros FS 5.1 clinical analyzer in respect of CRP-related risk  
10  
11 608 assessment of chronic metabolic diseases. *Clin Lab.* 2008;54(9–10):341–6.
- 12  
13 609 [12] Stolk R, Wink O, Zelissen P, Meijer R, van Gils A, Grobbee D. Validity and reproducibility of  
14  
15 610 ultrasonography for the measurement of intra-abdominal adipose tissue. *Int J Obes.* 2001 Sep  
16  
17 611 12;25(9):1346–51.
- 18  
19 612 [13] Bazzocchi A, Filonzi G, Ponti F, Albisinni U, Guglielmi G, Battista G. Ultrasound: Which role  
20  
21 613 in body composition? *Eur J Radiol.* 2016 Aug;85(8):1469–80.
- 22  
23 614 [14] Lang RM, Badano LP, Mor-Avi V, Afilalo J, Armstrong A, Ernande L, et al.  
24  
25 615 Recommendations for cardiac chamber quantification by echocardiography in adults: an  
26  
27 616 update from the American Society of Echocardiography and the European Association of  
28  
29 617 Cardiovascular Imaging. *J Am Soc Echocardiogr Off Publ Am Soc Echocardiogr.* 2015  
30  
31 618 Jan;28(1):1-39.e14.
- 32  
33 619 [15] Devereux RB, Alonso DR, Lutas EM, Gottlieb GJ, Campo E, Sachs I, et al. Echocardiographic  
34  
35 620 assessment of left ventricular hypertrophy: comparison to necropsy findings. *Am J Cardiol.*  
36  
37 621 1986 Feb;57(6):450–8.
- 38  
39 622 [16] Nagueh SF, Smiseth OA, Appleton CP, Byrd BF 3rd, Dokainish H, Edvardsen T, et al.  
40  
41 623 Recommendations for the Evaluation of Left Ventricular Diastolic Function by  
42  
43 624 Echocardiography: An Update from the American Society of Echocardiography and the  
44  
45 625 European Association of Cardiovascular Imaging. *J Am Soc Echocardiogr Off Publ Am Soc*  
46  
47 626 *Echocardiogr.* 2016 Apr;29(4):277–314.
- 48  
49 627 [17] Koene RJ, Prizment AE, Blaes A, Konety SH. Shared risk factors in cardiovascular disease and  
50  
51 628 cancer. *Circulation.* 2016;133(11):1104–14.
- 52  
53 629 [18] DHD. Ontdek de mogelijkheden van de LBZ [Internet]. 2022. Available from:  
54  
55 630 <https://www.dhd.nl/producten-diensten/registratie-data/ontdek-de-mogelijkheden-van-de-lbz>  
56  
57 631 [19] Nivel. Methode vaststellen cijfers zorgverlening huisartsen [Internet]. 2022. Available from:

- 1  
2  
3 632 <https://www.nivel.nl/nl/nivel-zorgregistraties-eerste-lijn/methoden/methoden-vaststellen->  
4  
5 633 [cijfers-zorgverlening/methode-vaststellen-cijfers-zorgverlening-huisartsen](https://www.nivel.nl/nl/nivel-zorgregistraties-eerste-lijn/methoden/methoden-vaststellen-cijfers-zorgverlening/methode-vaststellen-cijfers-zorgverlening-huisartsen)  
6  
7 634 [20] ten Berg MJ, Huisman A, van den Bemt PMLA, Schobben AFAM, Egberts ACG, van Solinge  
8  
9 635 WW. Linking laboratory and medication data: new opportunities for pharmacoepidemiological  
10  
11 636 research. *Clin Chem Lab Med*. 2007;45(1):13–9.  
12  
13 637 [21] Patel RS, Asselbergs FW. The GENIUS-CHD consortium. *Eur Heart J*. 2015 Oct;36(40):2674–  
14  
15 638 6.  
16  
17 639 [22] Matsushita K, Ballew SH, Astor BC, Jong PE de, Gansevoort RT, Hemmelgarn BR, et al.  
18  
19 640 Cohort profile: the chronic kidney disease prognosis consortium. *Int J Epidemiol*. 2013  
20  
21 641 Dec;42(6):1660–8.  
22  
23 642 [23] SFK. Foundation for Pharmaceutical Statistics [Internet]. [cited 2022 Dec 15]. Available from:  
24  
25 643 <https://www.sfk.nl/english>  
26  
27 644 [24] Franssens BT, Nathoe HM, Leiner T, Van Der Graaf Y, Visseren FLJ. Relation between  
28  
29 645 cardiovascular disease risk factors and epicardial adipose tissue density on cardiac computed  
30  
31 646 tomography in patients at high risk of cardiovascular events. *Eur J Prev Cardiol*.  
32  
33 647 2017;24(6):660–70.  
34  
35 648 [25] Geerlings MI, Appelman APA, Vincken KL, Algra A, Witkamp TD, Mali WPTM, et al. Brain  
36  
37 649 volumes and cerebrovascular lesions on MRI in patients with atherosclerotic disease. The  
38  
39 650 SMART-MR study. *Atherosclerosis*. 2010;210(1):130–6.  
40  
41 651 [26] Grool AM, Van Der Graaf Y, Mali WPTM, Geerlings MI. Location of cerebrovascular and  
42  
43 652 degenerative changes, depressive symptoms and cognitive functioning in later life: The  
44  
45 653 SMART-Medea study. *J Neurol Neurosurg Psychiatry*. 2011;82(10):1093–100.  
46  
47 654 [27] Verhoeven BAN, Velema E, Schoneveld AH, de Vries JPPM, de Bruin P, Seldenrijk CA, et al.  
48  
49 655 Athero-express: differential atherosclerotic plaque expression of mRNA and protein in relation  
50  
51 656 to cardiovascular events and patient characteristics. Rationale and design. *Eur J Epidemiol*.  
52  
53 657 2004;19(12):1127–33.  
54  
55 658 [28] Weijmans M, Van Der Graaf Y, De Borst GJ, Asselbergs FW, Cramer MJ, Algra A, et al.  
56  
57 659 Prevalence and risk of cardiovascular risk factors and events in offspring of patients at high

- 1  
2  
3 660 vascular risk and effect of location of parental vascular disease. *Int J Cardiol.* 2015;195:195–  
4  
5 661 202.  
6  
7 662 [29] Harlianto NI, Oosterhof N, Foppen W, Hol ME, Wittenberg R, van der Veen PH, et al. Diffuse  
8  
9 663 idiopathic skeletal hyperostosis is associated with incident stroke in patients with increased  
10  
11 664 cardiovascular risk. *Rheumatology.* 2021;1–8.  
12  
13 665 [30] Resnick D, Niwayama G. Radiographic and pathologic features of spinal involvement in  
14  
15 666 diffuse idiopathic skeletal hyperostosis (DISH). *Radiology.* 1976 Jun;119(3):559–68.  
16  
17 667 [31] Meijs MFL, Bots ML, Vonken EJA, Cramer MJM, Melman PG, Velthuis BK, et al. Rationale  
18  
19 668 and design of the SMART Heart study. *Netherlands Hear J.* 2007;15(9):295–8.  
20  
21 669 [32] Zwakenberg SR, De Jong PA, Hendriks EJ, Westerink J, Spiering W, De Borst GJ, et al.  
22  
23 670 Intimal and medial calcification in relation to cardiovascular risk factors. *PLoS One.* 2020;15(7  
24  
25 671 July):1–14.  
26  
27 672 [33] Schlösser FJV, Tangelder MJD, Verhagen HJM, van der Heijden GJMG, Muhs BE, van der  
28  
29 673 Graaf Y, et al. Growth predictors and prognosis of small abdominal aortic aneurysms. *J Vasc*  
30  
31 674 *Surg.* 2008;47(6):1127–33.  
32  
33 675 [34] Franssens BT, Eikendal AL, Leiner T, van der Graaf Y, Visseren FLJ, Hoogduin JM.  
34  
35 676 Reliability and agreement of adipose tissue fat fraction measurements with water-fat MRI in  
36  
37 677 patients with manifest cardiovascular disease. *NMR Biomed.* 2016;29(1):48–56.  
38  
39 678 [35] Goessens BMB, Visseren FLJ, de Nooijer J, van den Borne HW, Algra A, Wierdsma J, et al. A  
40  
41 679 pilot-study to identify the feasibility of an Internet-based coaching programme for changing the  
42  
43 680 vascular risk profile of high-risk patients. *Patient Educ Couns.* 2008;73(1):67–72.  
44  
45 681 [36] Brouwer BG, Visseren FLJ, Algra A, Van Bockel JH, Bollen ELEM, Doevendans PA, et al.  
46  
47 682 Effectiveness of a hospital-based vascular screening programme (SMART) for risk factor  
48  
49 683 management in patients with established vascular disease or type 2 diabetes: A parallel-group  
50  
51 684 comparative study. *J Intern Med.* 2010;268(1):83–93.  
52  
53 685 [37] Lafeber M, Grobbee DE, Bots ML, Thom S, Webster R, Rodgers A, et al. The Evening versus  
54  
55 686 Morning Polypill Utilization Study: The TEMPUS rationale and design. *Eur J Prev Cardiol.*  
56  
57 687 2014;21(4):425–33.  
58  
59  
60

- 1  
2  
3 688 [38] Jaspers NEM, Visseren FLJ, Van Der Graaf Y, Smulders YM, Damman OC, Brouwers C, et al.  
4  
5 689 Communicating personalised statin therapy-effects as 10-year CVD-risk or CVD-free life-  
6  
7 690 expectancy: Does it improve decisional conflict? Three-armed, blinded, randomised controlled  
8  
9 691 trial. *BMJ Open*. 2021;11(7):1–8.
- 11 692 [39] Brouwer BG. SMART risk factor screening in patients at high vascular risk [dissertation].  
12  
13 693 Utrecht University; 2008.
- 15 694 [40] Goessens BMB, Visseren FLJ, Sol BGM, de Man-Van Ginkel JM, Van Der Graaf Y. A  
16  
17 695 randomized, controlled trial for risk factor reduction in patients with symptomatic vascular  
18  
19 696 disease: The multidisciplinary Vascular Prevention by Nurses Study (VENUS). *Eur J Prev*  
20  
21 697 *Cardiol*. 2006;13(6):996–1003.
- 24 698 [41] Vernooij WP, Kaasjager HAH, Van Der Graaf Y, Wierdsma J, Grandjean HMH, Hovens  
25  
26 699 MMC, et al. Internet based vascular risk factor management for patients with clinically  
27  
28 700 manifest vascular disease: Randomised controlled trial. *BMJ*. 2012;344(7863):1–13.
- 30 701 [42] Dorresteijn JAN, Visseren FLJ, Wassink AMJ, Gondrie MJA, Steyerberg EW, Ridker PM, et  
31  
32 702 al. Development and validation of a prediction rule for recurrent vascular events based on a  
33  
34 703 cohort study of patients with arterial disease: The SMART risk score. *Heart*. 2013;99(12):866–  
35  
36 704 72.
- 39 705 [43] Hageman SHJ, McKay AJ, Ueda P, Gunn LH, Jernberg T, Hagström E, et al. Estimation of  
40  
41 706 recurrent atherosclerotic cardiovascular event risk in patients with established cardiovascular  
42  
43 707 disease: the updated SMART2 algorithm. *Eur Heart J*. 2022;
- 45 708 [44] Berkelmans GFN, Gudbjörnsdóttir S, Visseren FLJ, Wild SH, Franzen S, Chalmers J, et al.  
46  
47 709 Prediction of individual life-years gained without cardiovascular events from lipid, blood  
48  
49 710 pressure, glucose, and aspirin treatment based on data of more than 500 000 patients with Type  
50  
51 711 2 diabetes mellitus. *Eur Heart J*. 2019;40(34):2899–906.
- 53 712 [45] Cho JH, Han KD, Jung H-Y, Bond A. National health screening may reduce cardiovascular  
54  
55 713 morbidity and mortality among the elderly. *Public Health*. 2020 Oct;187:172–6.
- 57 714 [46] Antoku Y, Takemoto M, Mito T, Shiiyama R, Otsuka-Morisaki H, Tanaka A, et al. Impact of  
58  
59 715 Annual Cardiovascular Screening Tests in Patients with Type 2 Diabetes Mellitus without

- 1  
2  
3 716 Previous Histories of Cardiovascular Disease: Four-year Clinical Outcomes. *Intern Med.* 2021  
4  
5 717 Sep;60(17):2725–32.  
6  
7 718 [47] Pagidipati NJ, Navar AM, Pieper KS, Green JB, Bethel MA, Armstrong PW, et al. Secondary  
8  
9 719 Prevention of Cardiovascular Disease in Patients With Type 2 Diabetes Mellitus. *Circulation.*  
10  
11 720 2017 Sep 26;136(13):1193–203.  
12  
13 721 [48] Weijmans M, van der Graaf Y, de Borst GJ, Nathoe HM, Algra A, Visseren FLJ, et al. Parental  
14  
15 722 history and the risk of subsequent vascular events in patients with clinically manifest vascular  
16  
17 723 disease: The effects of sex of the parent and vascular disease location. *Atherosclerosis.*  
18  
19 724 2014;234(1):129–35.  
20  
21  
22 725 [49] Harlianto NI, Westerink J, Foppen W, Hol ME, Wittenberg R, Van Der Veen PH, et al.  
23  
24 726 Visceral adipose tissue and different measures of adiposity in different severities of diffuse  
25  
26 727 idiopathic skeletal hyperostosis. *J Pers Med.* 2021;11(7):1–11.  
27  
28 728 [50] Lafeber M, Grobbee DE, Schrover IM, Thom S, Webster R, Rodgers A, et al. Comparison of a  
29  
30 729 morning polypill, evening polypill and individual pills on LDL-cholesterol, ambulatory blood  
31  
32 730 pressure and adherence in high-risk patients; A randomized crossover trial. *Int J Cardiol.*  
33  
34 731 2015;181:193–9.  
35  
36 732 [51] Wilkinson MD, Dumontier M, Aalbersberg IJ, Appleton G, Axton M, Baak A, et al. The FAIR  
37  
38 733 Guiding Principles for scientific data management and stewardship. *Sci Data.*  
39  
40 734 2016;3(1):160018.  
41  
42  
43  
44  
45  
46  
47  
48  
49  
50  
51  
52  
53  
54  
55  
56  
57  
58  
59  
60

1  
2 **Figure legends**

3  
4 **Figure 1. Course of the UCC-SMART study**

5  
6 ECG, electrocardiogram; UCC-SMART, Utrecht Cardiovascular Cohort – Second Manifestations of  
7 Arterial Disease; UMC Utrecht, University Medical Centre Utrecht  
8  
9  
10  
11  
12  
13

14 **Figure 2. Timeline of measurements collected for or starting from a certain period**

15  
16 ACE, angiotensin converting enzyme; apoB, apolipoprotein B; CAC, coronary artery calcium; CRP,  
17 C-reactive protein; CT, computerized tomography; CV, cardiovascular; CVD, cardiovascular disease;  
18 HbA1c, glycated haemoglobin; Lp(a), lipoprotein a; MRI, magnetic resonance imaging; T, Tesla;  
19 TSH, thyroid stimulating hormone  
20  
21  
22  
23  
24  
25  
26  
27  
28

29 **Figure 3. Cumulative number of patients over time**

30  
31 Inclusion in the UCC-SMART study started in September 1996.  
32  
33  
34  
35  
36

37 **Figure 4. Distribution of inclusion diagnoses**

38  
39 CVD, cardiovascular disease; HIV, human immunodeficiency virus  
40  
41  
42  
43  
44  
45  
46  
47  
48  
49  
50  
51  
52  
53  
54  
55  
56  
57  
58  
59  
60



1  
2  
3  
4  
5  
6  
7  
8  
9  
10  
11  
12  
13  
14  
15  
16  
17  
18  
19  
20  
21  
22  
23  
24  
25  
26

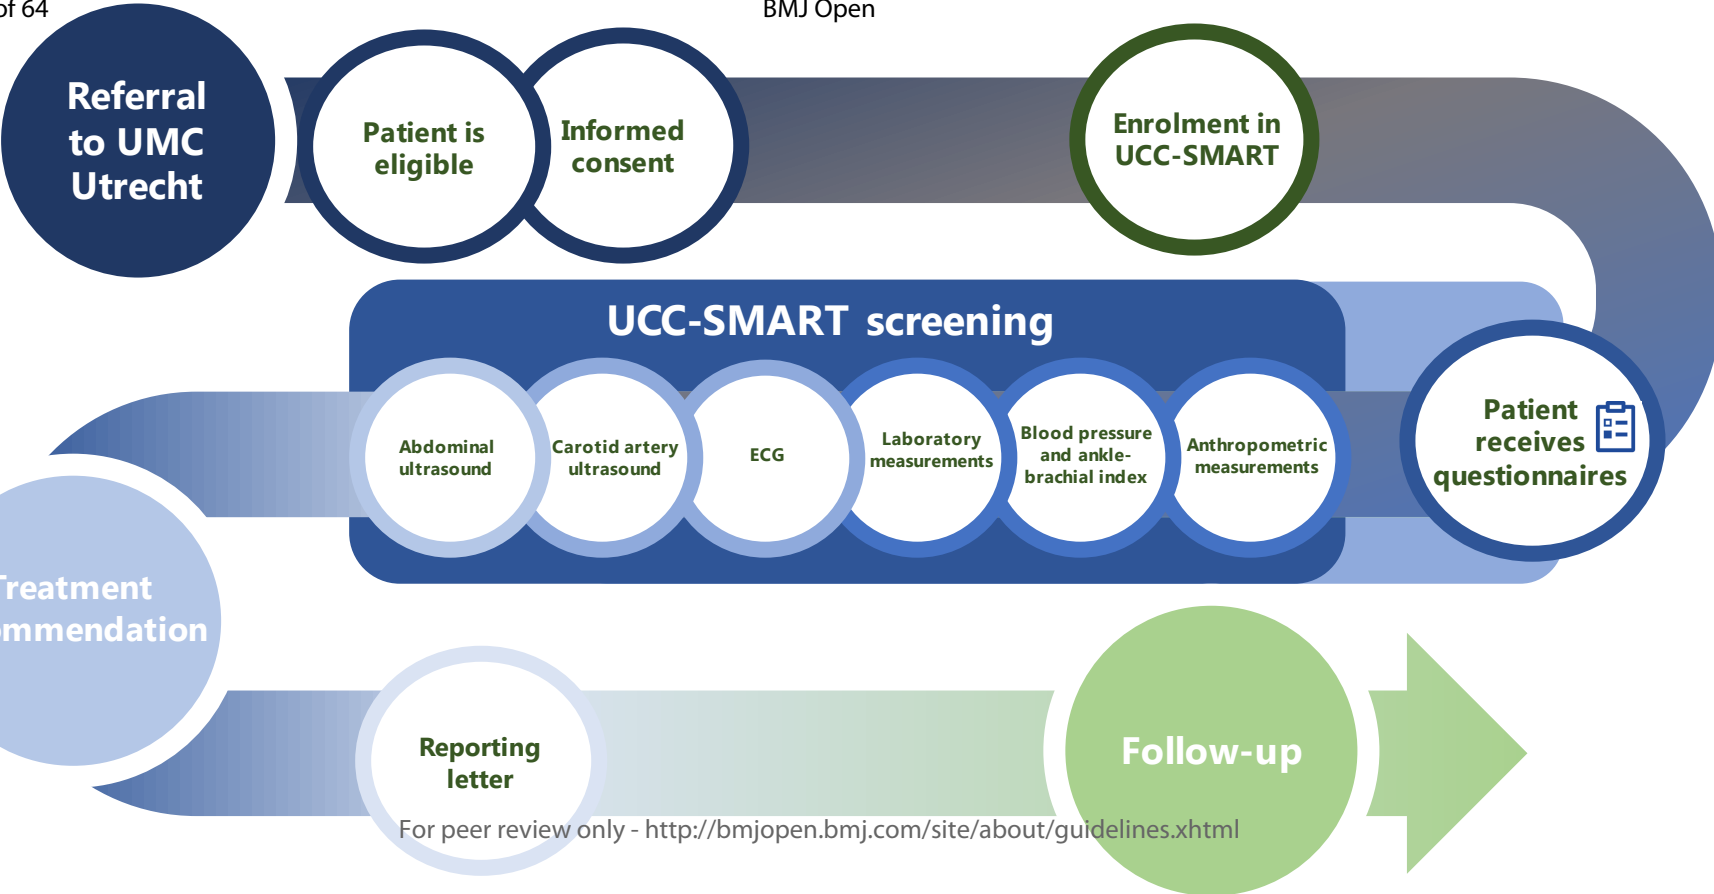

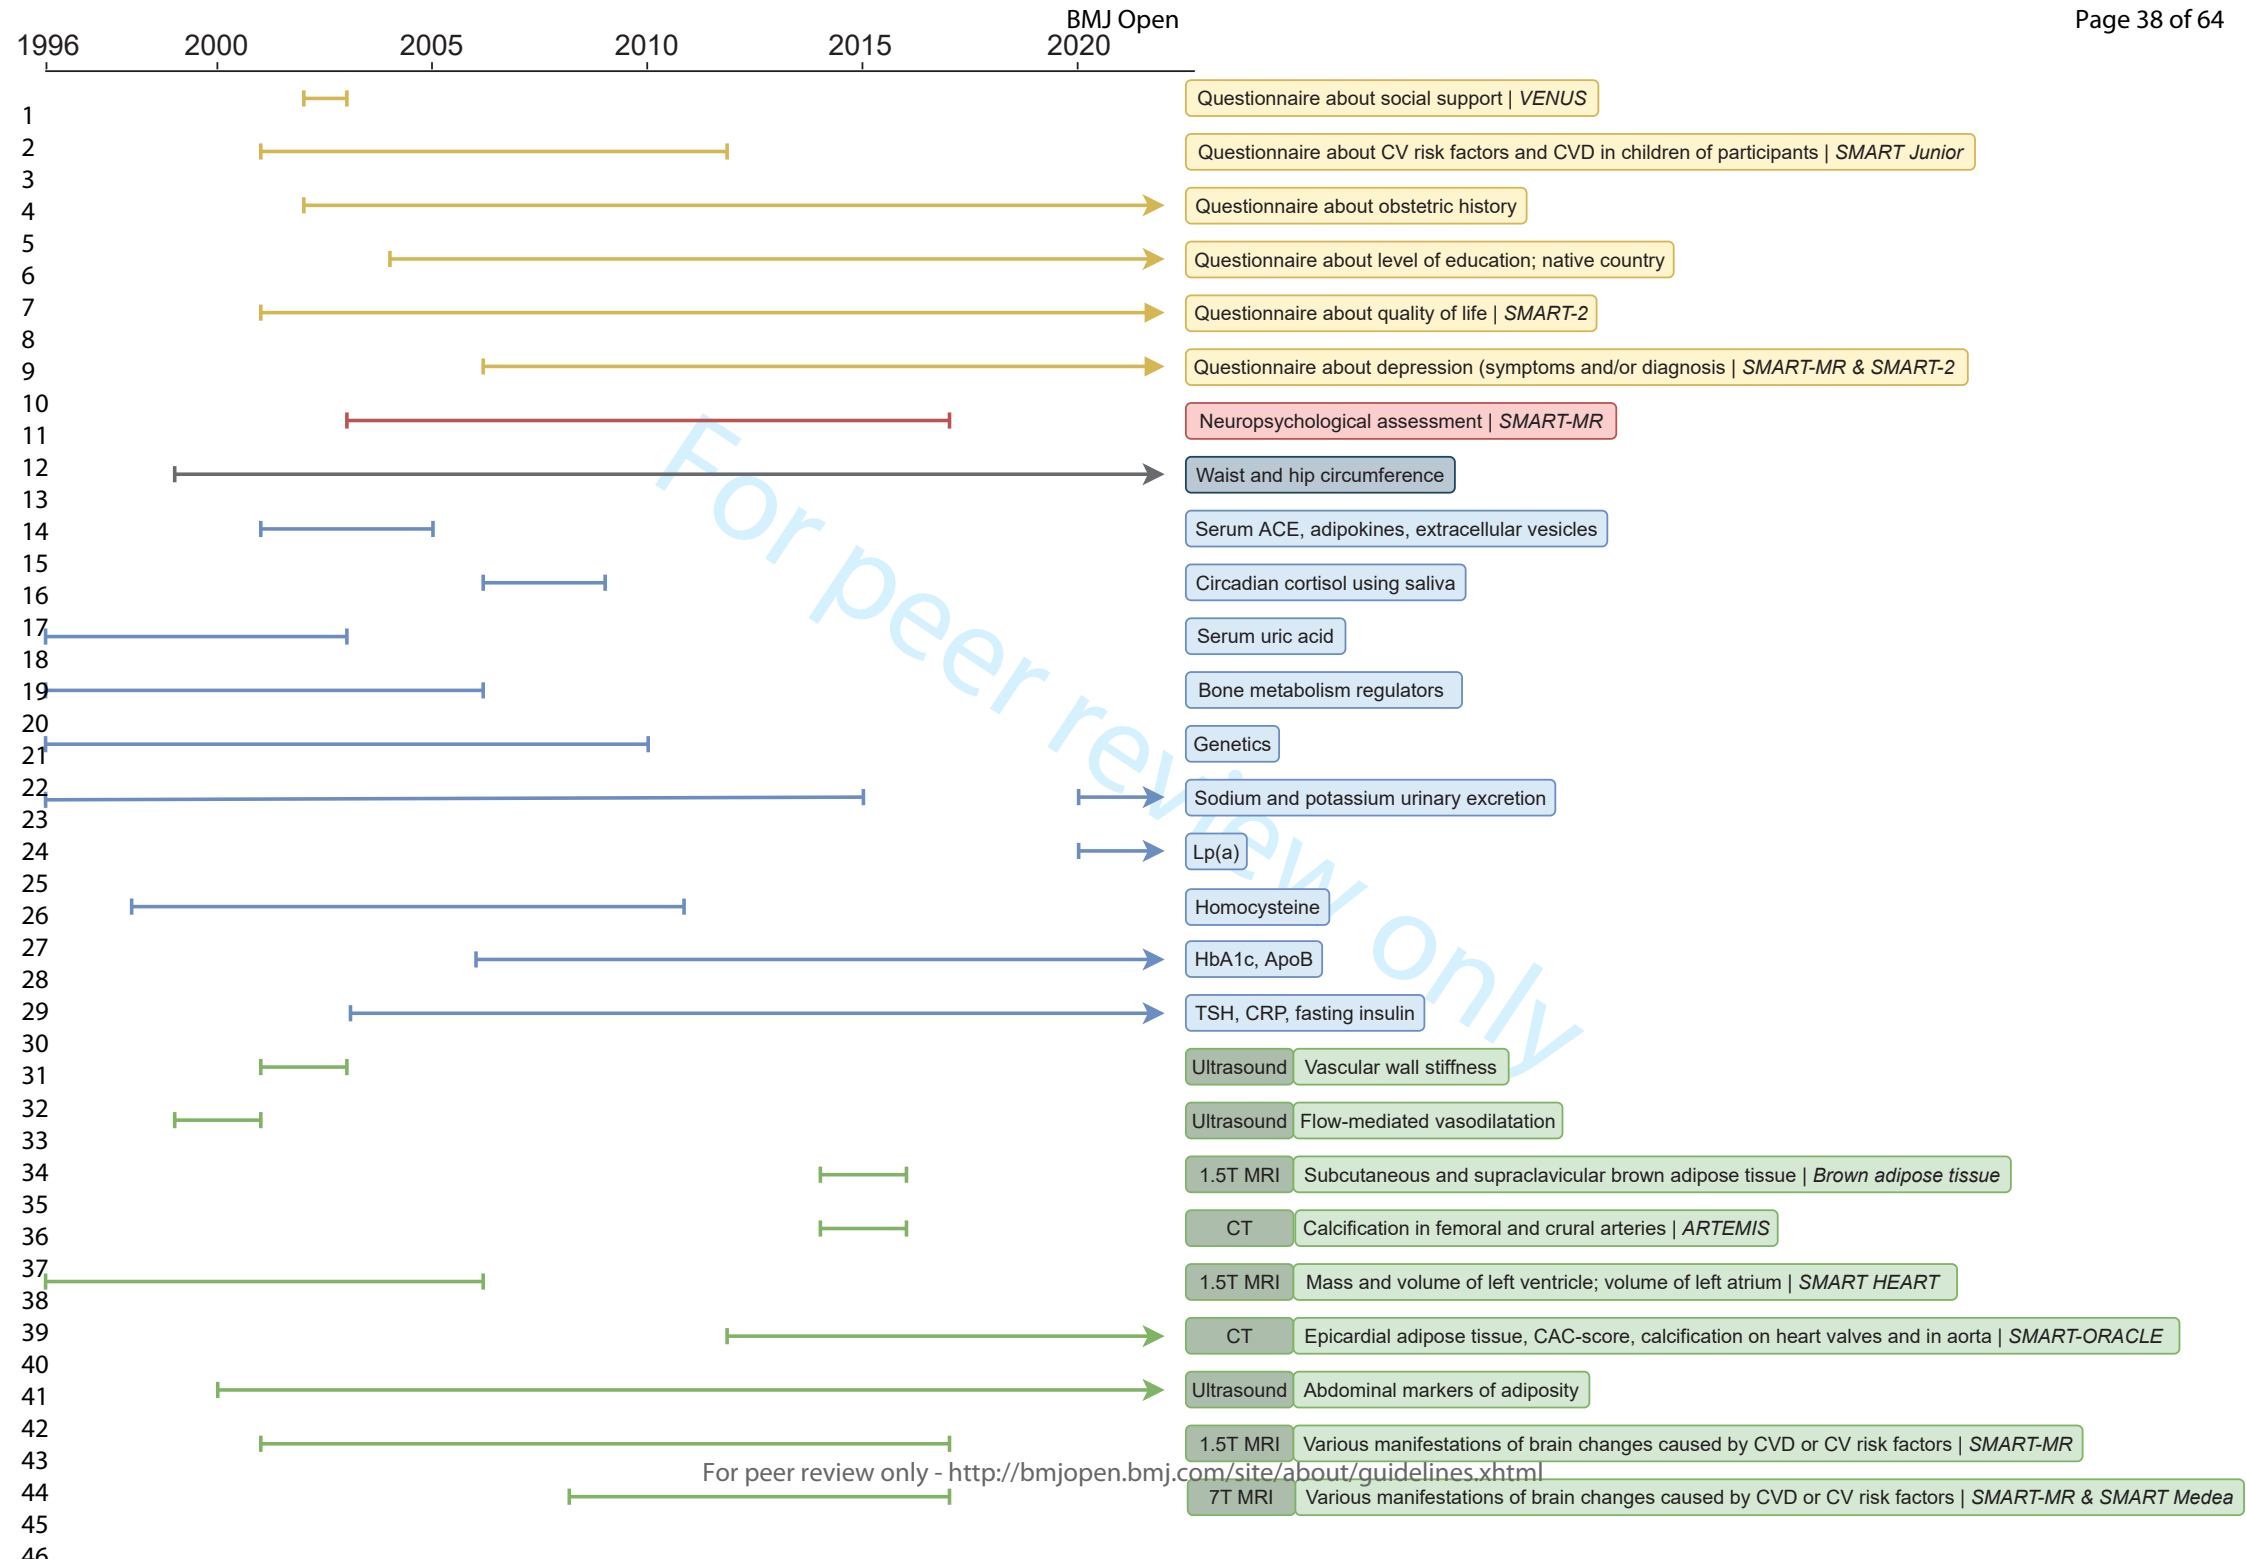

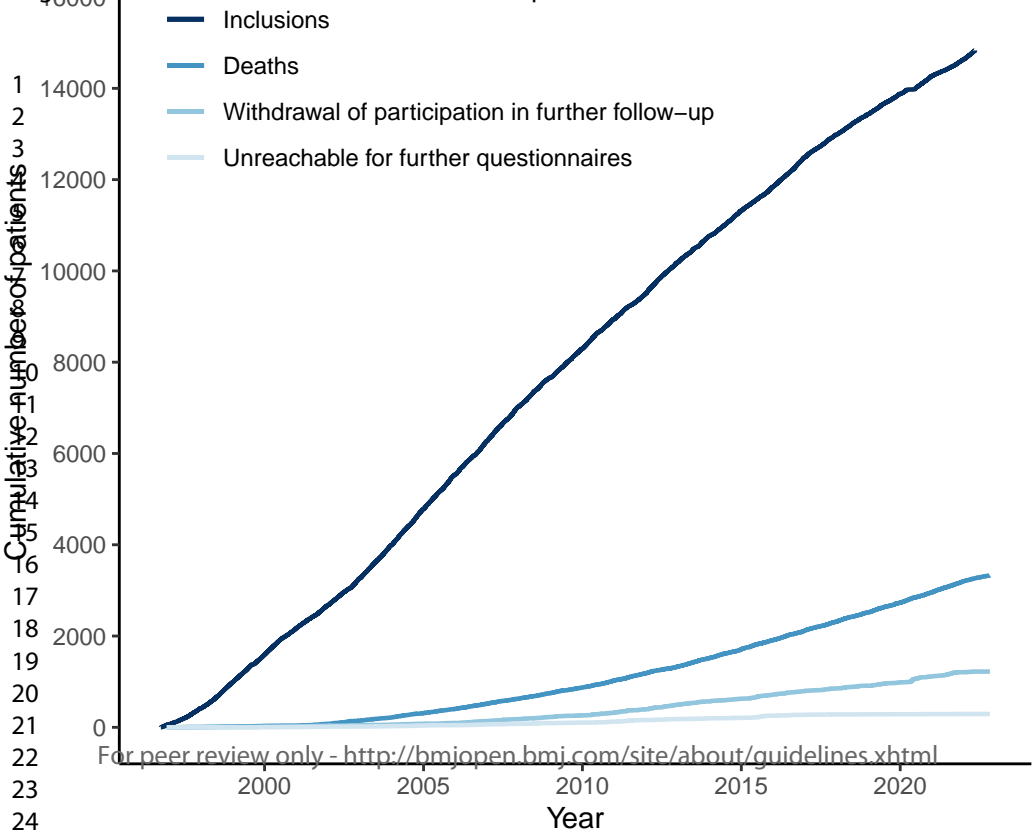

Total (n = 14,830)  
BMJ Open

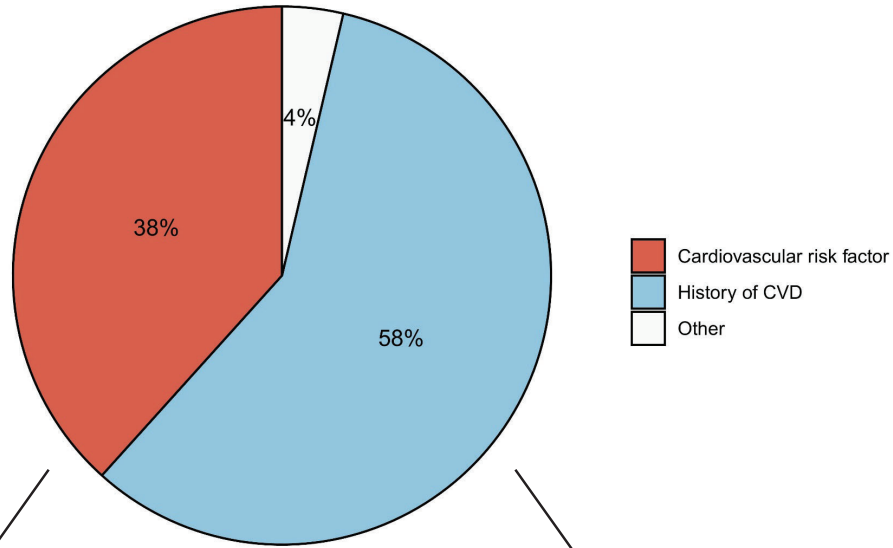

Cardiovascular risk factor (n = 5,684)

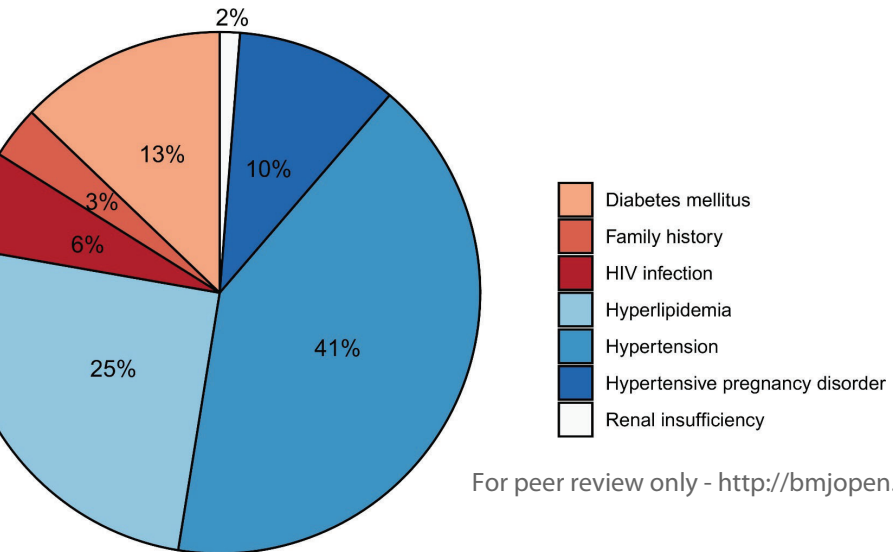

History of CVD (n = 8,603)

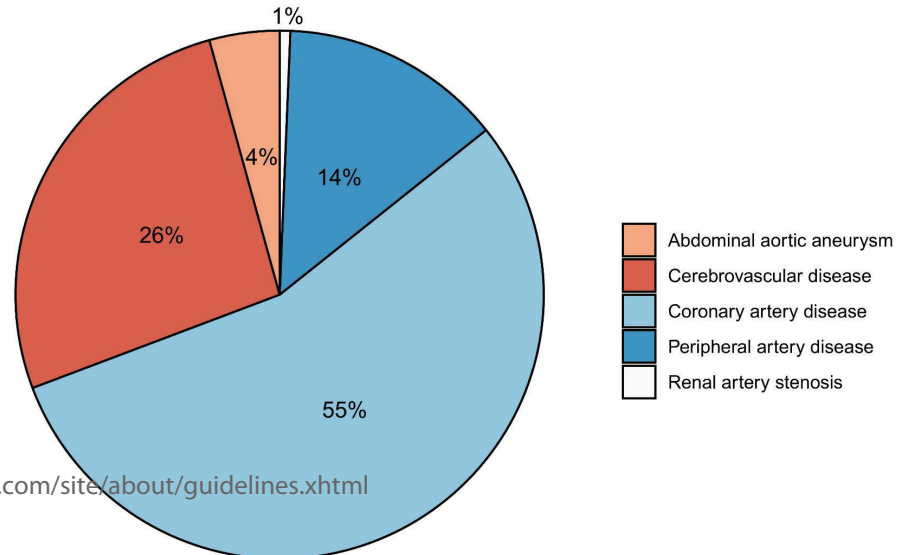

1  
2  
3  
4  
5  
6  
7  
8  
9  
10  
11  
12  
13  
14  
15  
16  
17  
18  
19  
20  
21  
22  
23  
24  
25  
26  
27  
28  
29  
30  
31  
32  
33  
34  
35  
36  
37  
38

1  
2  
3  
4  
5  
6  
7  
8  
9  
10  
11  
12  
13  
14  
15  
16  
17  
18  
19  
20  
21  
22  
23  
24  
25  
26  
27  
28  
29  
30  
31  
32  
33  
34  
35  
36  
37  
38  
39  
40  
41  
42  
43  
44  
45  
46  
47  
48  
49  
50  
51  
52  
53  
54  
55  
56  
57  
58  
59  
60

## Supplementary material

**Cohort profile: the Utrecht Cardiovascular Cohort – Second Manifestations of Arterial Disease (UCC-SMART) study – an ongoing prospective cohort study of patients at high cardiovascular risk in the Netherlands**

For peer review only

1  
2  
3 **Content list**

4 Supplementary Table 1. Inclusion criteria and exclusion criteria ..... 3  
5  
6 Supplementary Table 2. Variables available in UCC-SMART ..... 5  
7  
8 Supplementary Table 3. Measurements that have been performed in the past ..... 7  
9  
10 Supplementary Table 4. Definitions of established cardiovascular disease ..... 8  
11  
12 Supplementary Table 5. Definitions of outcome events..... 9  
13  
14 Supplementary Table 6. Substudies of UCC-SMART ..... 12  
15  
16 Supplementary Table 7. Baseline characteristics of participants with complete follow-up and  
17 participants who were lost to follow-up ..... 19  
18  
19 Supplemental Figure 1. Timeline of substudies of UCC-SMART ..... 20  
20  
21  
22  
23  
24  
25  
26  
27  
28  
29  
30  
31  
32  
33  
34  
35  
36  
37  
38  
39  
40  
41  
42  
43  
44  
45  
46  
47  
48  
49  
50  
51  
52  
53  
54  
55  
56  
57  
58  
59  
60  
References ..... 22

**Supplementary Table 1. Inclusion criteria and exclusion criteria**

| Inclusion criteria                                                    | Definition                                                                                                                                                                                                                                                                                                                                                           |
|-----------------------------------------------------------------------|----------------------------------------------------------------------------------------------------------------------------------------------------------------------------------------------------------------------------------------------------------------------------------------------------------------------------------------------------------------------|
| One or more of the following cardiovascular diseases or risk factors: |                                                                                                                                                                                                                                                                                                                                                                      |
| Cardiovascular disease                                                |                                                                                                                                                                                                                                                                                                                                                                      |
| Transient ischemic attack                                             | Sudden onset, $\leq 24$ hours of:<br><i>carotid</i> : temporary motor weakness in one half of the body, language disorder, blindness in one eye<br><br><i>vertebrobasilar</i> : $\geq 2$ simultaneously: bilateral motor weakness or paraesthesia, dizziness, diplopia, dysphagia, ataxia, dysarthria<br><br><i>unknown vascular region</i> : hemianopia, dysarthria |
| Cerebral infarction                                                   | Criteria as for TIA, but duration of $> 24$ hours                                                                                                                                                                                                                                                                                                                    |
| Subarachnoid haemorrhage                                              | Sudden headache and (temporary) loss of consciousness, often accompanied by neck stiffness, nausea and vomiting, with blood in basal cisterns confirmed by CT or xanthochromia in cerebrospinal fluid                                                                                                                                                                |
| Carotid artery stenosis                                               | Duplex ultrasound confirmed stenosis or occlusion of $\geq 1$ carotid artery with diameter reduction $\geq 50\%$                                                                                                                                                                                                                                                     |
| Ischemic retinal syndrome                                             | Visual field defect diagnosed as retinal syndrome by ophthalmologist                                                                                                                                                                                                                                                                                                 |
| Angina pectoris                                                       | Chest pain with proven stenosis on coronary angiogram                                                                                                                                                                                                                                                                                                                |
| Myocardial infarction                                                 | $\geq 2$ of following:<br>- Chest pain $> 20$ minutes, not relieved by nitrates;<br>- ST elevation $> 1$ mm in 2 contiguous ECG leads, or left bundle branch block;<br>- Troponin levels $> 60$ ng/L with rise and fall pattern*                                                                                                                                     |
| Coronary syndrome requiring PCI or CABG                               |                                                                                                                                                                                                                                                                                                                                                                      |
| Abdominal aortic aneurysm                                             | Ultrasound confirmed local dilatation of abdominal aorta with anterior-posterior diameter $\geq 3$ cm and/or distal-proximal ratio of $> 1,5$                                                                                                                                                                                                                        |
| Renal artery stenosis                                                 | Stenosis of $\geq 1$ renal artery with lumen narrowing $\geq 50\%$ , caused by atherosclerosis                                                                                                                                                                                                                                                                       |
| Peripheral artery disease of the lower limbs                          | Fontaine classification:<br>- Fontaine II: intermittent claudication: pain (or other symptoms) in one or both legs after certain walking distance, disappearing at rest;<br>- Fontaine III: rest/nocturnal pain;<br>- Fontaine IV: ischemic ulceration, necrosis or gangrene; confirmed by ABI $\leq 0.90$ at rest and/or $\geq 20\%$ post-exercise decrease         |
| Cardiovascular risk factors                                           |                                                                                                                                                                                                                                                                                                                                                                      |
| Hypertension                                                          | Estimated as severe risk factor by physician, based on e.g. difficult-to-control hypertension, target organ damage, medical or family history                                                                                                                                                                                                                        |
| Hyperlipidaemia                                                       | Estimated as severe risk factor by physician, based on e.g. difficult-to-control hyperlipidaemia, suspected lipid metabolism disorder, medical or family history                                                                                                                                                                                                     |

|                                                                 |                                                                                                                         |
|-----------------------------------------------------------------|-------------------------------------------------------------------------------------------------------------------------|
| Diabetes mellitus                                               | Fasting glucose $\geq 7.0$ mmol/L, non-fasting glucose $\geq 11.1$ mmol/L or use of oral antidiabetic agents or insulin |
| Renal insufficiency                                             | Serum creatinine $> 120$ $\mu\text{mol/L}$                                                                              |
| HIV infection                                                   | Chronic infection with human immunodeficiency virus                                                                     |
| Family medical history                                          | Positive family history for premature cardiovascular disease in 1 <sup>st</sup> degree relatives                        |
| Pre-eclampsia†                                                  | Gestational hypertension accompanied by proteinuria, other maternal organ dysfunction or uteroplacental dysfunction     |
| HELLP syndrome†                                                 | Haemolysis, elevated liver enzymes, low platelets as a manifestation of pre-eclampsia                                   |
| Placental abruption†                                            | Gestational hypertension accompanied by placental abruption as an effect of uteroplacental insufficiency                |
| Intrauterine growth restriction†                                | Gestational hypertension accompanied by fetal growth restriction as an effect of uteroplacental insufficiency           |
| <b>Remaining inclusion criteria</b>                             |                                                                                                                         |
| 18 – 90 years of age                                            |                                                                                                                         |
| Independent in most daily activities                            | Rankin scale $\leq 3$ <sup>1</sup>                                                                                      |
| <b>Exclusion criteria</b>                                       |                                                                                                                         |
| Pregnancy                                                       |                                                                                                                         |
| Short life expectancy (per judgement of the treating physician) |                                                                                                                         |
| Insufficient understanding and expression of the Dutch language |                                                                                                                         |
| No informed consent                                             |                                                                                                                         |
| Follow-up impossible                                            |                                                                                                                         |

\* In earlier years of the UCC-SMART study, this laboratory item was defined as CK elevation of  $\geq 2$ x upper limit and MB-fraction  $> 5\%$  of total CK level.

† Hypertensive pregnancy complications are based on the ISSHP criteria<sup>2</sup>

ABI, ankle-brachial index; CABG, coronary artery bypass grafting; CK, creatine kinase; CT, computed tomography; ECG, electrocardiogram; HELLP, haemolysis, elevated liver enzymes and low platelets; HIV, human immunodeficiency virus; ISSHP, International Society for the Study of Hypertension in Pregnancy; PCI, percutaneous coronary intervention; TIA, transient ischemic attack.



**Supplementary Table 2. Variables available in UCC-SMART**

| Health questionnaire            | Medication use                   | Physical examination                 | Radiology measurements          | Laboratory measurements            |
|---------------------------------|----------------------------------|--------------------------------------|---------------------------------|------------------------------------|
| Medical history                 | Statins                          | Weight (kg)                          | Visceral fat (cm)               | Haemoglobin (mmol/L)               |
| Age (years)                     | Ezetimibe                        | Height (m)                           | Subcutaneous fat (cm)           | Haematocrit (%)                    |
| Sex                             | Fibrates                         | Blood pressure (mmHg)                | Carotid artery stenosis (%)     | Total cholesterol (mmol/L)         |
| Smoking and pack years          | Thiazide diuretics               | Ankle-brachial index                 | Carotid intima thickness (mm)   | LDL-C (mmol/L)                     |
| Alcohol use and number of units | Loop diuretics                   | Body mass index (kg/m <sup>2</sup> ) | Aortic artery diameter (cm)     | HDL-C (mmol/L)                     |
| Level of education              | Potassium saving diuretics       | Waist circumference (cm)             | Kidney size and volume (cm; mL) | Apolipoprotein B (g/L)             |
| Country of birth                | ACE-inhibitors                   | Hip circumference (cm)               | Electrocardiography             | Triglycerides (mmol/L)             |
| Quality of life*                | Angiotensin II-receptor blockers |                                      | Echocardiography†               | HbA1c (%)                          |
| Exercise (MET-hours per week)   | Aldosterone antagonists          |                                      |                                 | Fasting glucose (mmol/L)           |
|                                 | Beta-blockers                    |                                      |                                 | Fasting insulin (mU/L)             |
|                                 | Calcium antagonists              |                                      |                                 | Creatinine (μmol/L)                |
|                                 | Alpha blockers                   |                                      |                                 | eGFR (ml/min/1.73 m <sup>2</sup> ) |
|                                 | Central acting antihypertensives |                                      |                                 | Albuminuria (mg/L)                 |
|                                 | Direct vasodilators              |                                      |                                 | Albumin-to-creatinine ratio        |
|                                 | Aspirin                          |                                      |                                 | CRP (mg/L)                         |
|                                 | Clopidogrel                      |                                      |                                 | TSH (mU/L)                         |
|                                 | Dipyridamole                     |                                      |                                 | Lp(a)                              |
|                                 | DOAC                             |                                      |                                 | Urine sodium                       |
|                                 | Vitamin K antagonists            |                                      |                                 | Urine potassium                    |
|                                 | LMWH                             |                                      |                                 |                                    |
|                                 | Oral glucose-lowering therapy    |                                      |                                 |                                    |
|                                 | Insulin                          |                                      |                                 |                                    |
|                                 | Antidepressants                  |                                      |                                 |                                    |
|                                 | Benzodiazepines                  |                                      |                                 |                                    |

1  
2  
3 \* Based on EQ-5D questionnaire

4 † Echocardiography will be added to the UCC-SMART program in the near future

5 ACE, angiotensin converting enzyme; CRP, C-reactive protein; DOAC, direct oral anticoagulant; eGFR, estimated glomerular filtration rate; HbA1c,  
6 glycosylated haemoglobin type A1c; HDL-C, high-density lipoprotein cholesterol; LDL-C, low-density lipoprotein cholesterol; LMWH, low molecular  
7 weight heparin; Lp(a), lipoprotein(a); MET, metabolic equivalent of task; TSH, thyroid stimulating hormone; UCC-SMART, Utrecht Cardiovascular Cohort –  
8 Second Manifestations of Arterial Diseases  
9  
10  
11  
12  
13  
14  
15  
16  
17  
18  
19  
20  
21  
22  
23  
24  
25  
26  
27  
28  
29  
30  
31  
32  
33  
34  
35  
36  
37  
38  
39  
40  
41  
42  
43  
44  
45  
46

For peer review only

**Supplementary Table 3. Measurements that have been performed in the past**

---

**Vascular wall stiffness** was determined from 2001 until 2003 using the Wall Track System that captures vascular diameter changes using radio-frequent signals. At the first signal, the position of the anterior and posterior vascular wall of the common carotid artery are marked at 2 cm proximal to the carotid bulb. Then, for five times on both the left and right side, changes in arterial diameter ( $\Delta D$ ) and end-diastolic diameter ( $D_d$ ) are registered during four seconds, and the mean is calculated. Carotid distension is defined as the change in artery diameter in systole relative to diastolic diameter. Other stiffness indices include  $\beta$  stiffness index ( $\ln(SBP/DBP)/(\Delta D/D_d)$ ), compliance coefficient ( $(\pi \times D_d \times \Delta D)/2 \times$  pulse pressure), distensibility coefficient ( $(2 \times \Delta D/D_d)/$  pulse pressure), Peterson's modulus (pressure change required for theoretical 100% increase in diameter) and Young's elastic modulus (pressure per  $\text{mm}^2$  required for theoretical 100% extension).

---

**Flow-mediated vasodilatation (FMD)** was assessed temporarily starting from March 1999. Here, the Wall Track System described above was used to capture the diameter of the brachial artery in the elbow crease. Following 3 baseline readings, new measurements were taken every 30 seconds for 5 minutes: first after a blood pressure cuff at the forearm was inflated to 100 mmHg above SBP for 4 minutes, and then after sublingual administration of 400  $\mu\text{g}$  of nitroglycerin. Endothelial function was defined as the proportional increase of diameter after nitrate and the baseline-adjusted maximal diameter following ischemia. This examination was stopped in June 2001, since analysis in the first 400 patients showed this measurement was not related to other known measures of atherosclerosis.

---

**Quality of life** information was collected through questionnaires based on the 36-Item Short Form Health Survey (SF-36)<sup>3</sup>, sent to participants from 2001 until 2019. This quality of life assessment contains scales for 1) limitations in physical activities; 2) limitations in social activities; 3) limitations in usual role activities because of physical health problems; 4) bodily pain; 5) mental health; 6) limitations in usual role activities because of emotional problems; 7) vitality and 8) general health perceptions.

---

**Homocysteine** was measured from 1998 until 2011 in fasting blood samples by high performance liquid chromatography with fluorescence detection. Up until 2000, a methionine loading test was performed in patients younger than 50 years. Plasma homocysteine was measured six hours after oral administration of 100mg methionine per kilogram bodyweight.

---

DBP, diastolic blood pressure; SBP; systolic blood pressure

**Supplementary Table 4. Definitions of established cardiovascular disease**

| <b>Cardiovascular disease</b> | <b>Definition of cardiovascular disease*</b>                                                                            |
|-------------------------------|-------------------------------------------------------------------------------------------------------------------------|
| Cerebrovascular disease       | TIA, cerebral infarction, ischemic retinal syndrome, carotid surgery or angioplasty in medical history                  |
| Coronary artery disease       | Myocardial infarction, angina pectoris, $\geq 1$ vessel disease on coronary angiography, PCI or CABG in medical history |
| Abdominal aortic aneurysm     | Abdominal aortic aneurysm, surgical or endovascular treatment of abdominal aortic aneurysm in medical history           |
| Peripheral artery disease     | Fontaine classification $\geq$ II, amputation, vascular surgery or angioplasty in medical history                       |

\* Definitions of these items are listed in Supplementary Table 1.

CABG, coronary artery bypass grafting; PCI, percutaneous coronary intervention; TIA, transient ischemic attack.

Supplementary Table 5. Definitions of outcome events

| Outcome event                               | Definition of outcome event                                                                                                                                                                                                                                                                                                                                                |
|---------------------------------------------|----------------------------------------------------------------------------------------------------------------------------------------------------------------------------------------------------------------------------------------------------------------------------------------------------------------------------------------------------------------------------|
| <b>Primary endpoints</b>                    |                                                                                                                                                                                                                                                                                                                                                                            |
| <b>Stroke</b>                               |                                                                                                                                                                                                                                                                                                                                                                            |
| Ischemic stroke / haemorrhagic infarction   | >24 hours of associated clinical signs causing increased disability of $\geq 1$ grade on modified Rankin scale <sup>1</sup> , and new (haemorrhagic) infarction on CT or MRI <2 weeks after stroke                                                                                                                                                                         |
| Cerebral haemorrhage                        | Cerebral haemorrhage confirmed with CT, MRI or surgery                                                                                                                                                                                                                                                                                                                     |
| Subarachnoid haemorrhage                    | Subarachnoid haemorrhage confirmed with CT, MRI or surgery                                                                                                                                                                                                                                                                                                                 |
| Type not determined                         | >24 hours of associated clinical signs causing increased disability of $\geq 1$ grade on modified Rankin scale, but no brain imaging performed                                                                                                                                                                                                                             |
| <b>Retinal syndromes</b>                    |                                                                                                                                                                                                                                                                                                                                                                            |
| Infarction                                  | Associated clinical symptoms, typical fundus changes and/or vision loss, scotoma on perimetry                                                                                                                                                                                                                                                                              |
| Haemorrhage                                 | Associated clinical symptoms, typical fundus changes and vision loss                                                                                                                                                                                                                                                                                                       |
| <b>Myocardial infarction</b>                |                                                                                                                                                                                                                                                                                                                                                                            |
|                                             | The assessment includes: chest pain >30 minutes, elevated cardiac enzymes, characteristic ECG-changes                                                                                                                                                                                                                                                                      |
| STEMI                                       | Acute chest pain with persistent (>20 minutes) ST-elevation                                                                                                                                                                                                                                                                                                                |
| NSTEMI                                      | Acute chest pain without ST-elevation, with elevated troponin                                                                                                                                                                                                                                                                                                              |
| Intervention-related myocardial infarction  | New Q wave and elevated troponin <7 days after any intervention (for PCI >3x, for CABG >5x)                                                                                                                                                                                                                                                                                |
| Probable myocardial infarction              | Typical pain, persistent STT-changes, no documented course of cardiac enzymes                                                                                                                                                                                                                                                                                              |
| <b>Heart failure</b>                        |                                                                                                                                                                                                                                                                                                                                                                            |
|                                             | $\geq 2$ of the following: dyspnoea, dyspnoea on exertion, paroxysmal nocturnal dyspnoea, orthopnoea, exercise intolerance, pulmonary oedema, increased central venous pressure, third heart tone, hepatojugular reflux, altered hemodynamics, peripheral oedema, cardiomegaly; and (intensified) treatment with loop diuretics or intravenous vasoactive inotropic agents |
|                                             | Classified as: systolic heart failure (at least moderate left ventricle dysfunction or LVEF <40%) or heart failure with preserved ejection fraction, due to coronary disease, valve disease or other causes                                                                                                                                                                |
| <b>Rupture of abdominal aortic aneurysm</b> |                                                                                                                                                                                                                                                                                                                                                                            |
|                                             | Rupture abdominal aortic aneurysm, proven by ultrasound, CT or laparotomy                                                                                                                                                                                                                                                                                                  |
| <b>Renal disease</b>                        |                                                                                                                                                                                                                                                                                                                                                                            |
| End-stage renal disease                     | CKD stage 5 (i.e. persisting eGFR <15ml/min/1.73 m <sup>2</sup> for >3 months and/or need for renal replacement therapy (chronic dialysis or renal transplantation))                                                                                                                                                                                                       |

|                                                                 |                                                                                                                                                                                                                                                                                                                                                                                                                                                                                                                                                                                                                                                                       |
|-----------------------------------------------------------------|-----------------------------------------------------------------------------------------------------------------------------------------------------------------------------------------------------------------------------------------------------------------------------------------------------------------------------------------------------------------------------------------------------------------------------------------------------------------------------------------------------------------------------------------------------------------------------------------------------------------------------------------------------------------------|
| Acute renal insufficiency – temporary renal replacement therapy | Acute kidney injury requiring temporary renal replacement therapy                                                                                                                                                                                                                                                                                                                                                                                                                                                                                                                                                                                                     |
| Acute renal insufficiency – no renal replacement therapy        | Acute kidney injury KDIGO stage 3 (i.e. serum creatinine 3 times baseline creatinine and/or serum creatinine $\geq 354$ $\mu\text{mol/L}$ )                                                                                                                                                                                                                                                                                                                                                                                                                                                                                                                           |
| <b>Bleeding</b>                                                 | Bleeding requiring outpatient treatment or (prolonged) hospitalization                                                                                                                                                                                                                                                                                                                                                                                                                                                                                                                                                                                                |
| Major bleeding                                                  | <i>ISTH definition:</i> fatal bleeding and/or bleeding in critical area or organ (such as intracranial, intraspinal, intraocular, retroperitoneal, intra-articular, pericardial, intramuscular causing compartment syndrome), bleeding causing Hb level drop of $\geq 1.24$ mmol/L or leading to transfusion of $\geq 2$ units of blood <sup>4</sup><br><br><i>BARC type 3:</i> overt bleeding with Hb level drop of $\geq 1.86$ mmol/L, leading to transfusion, cardiac tamponade, surgical intervention for control or intravenous vasoactive agents, or located intracranial or intraocular compromising vision<br><i>BARC type 5:</i> fatal bleeding <sup>5</sup> |
| <b>Diabetes</b>                                                 | Self-reported diagnosis, confirmed and classified based on a questionnaire. If necessary, additional information is requested from the general practitioner or looked up in the electronic health record.                                                                                                                                                                                                                                                                                                                                                                                                                                                             |
| DM type 1                                                       | Insulin needed immediately at onset and absence of oral glucose lowering medication. Supportive but not mandatory: $\leq 25$ years of age, BMI $< 25$ kg/m <sup>2</sup> , presence of anti-GAD antibodies                                                                                                                                                                                                                                                                                                                                                                                                                                                             |
| DM type 2                                                       | Diagnosed between age 35 and 40 and BMI $> 33$ kg/m <sup>2</sup> or diagnosed after age 40 and BMI $> 27$ kg/m <sup>2</sup>                                                                                                                                                                                                                                                                                                                                                                                                                                                                                                                                           |
| <b>Dementia</b>                                                 | Self-reported diagnosis, confirmed and classified based on a questionnaire. Classified as: Alzheimer's disease; vascular dementia; a mix of Alzheimer's disease and vascular dementia; Lewy Body dementia; or frontotemporal dementia.                                                                                                                                                                                                                                                                                                                                                                                                                                |
| <b>Vascular mortality</b>                                       |                                                                                                                                                                                                                                                                                                                                                                                                                                                                                                                                                                                                                                                                       |
| Fatal cerebral infarction                                       | Cerebral infarction leading to Rankin score 4 or 5 followed by death (reasonably plausible that patient would not have died without infarction)                                                                                                                                                                                                                                                                                                                                                                                                                                                                                                                       |
| Fatal cerebral haemorrhage                                      | Cerebral haemorrhage leading to Rankin score 4 or 5 followed by death (reasonably plausible that patient would not have died without infarction)                                                                                                                                                                                                                                                                                                                                                                                                                                                                                                                      |
| Fatal stroke - type not determined                              | Stroke without radiological confirmation leading to Rankin score 4 or 5 followed by death (reasonably plausible that patient would not have died without stroke)                                                                                                                                                                                                                                                                                                                                                                                                                                                                                                      |
| Fatal myocardial infarction                                     | Documented myocardial infarction followed by death ( $> 1$ hour after onset of symptoms)                                                                                                                                                                                                                                                                                                                                                                                                                                                                                                                                                                              |

|                                                          |                                                                                                                                                                                                                                                                                                                                                                                                                               |
|----------------------------------------------------------|-------------------------------------------------------------------------------------------------------------------------------------------------------------------------------------------------------------------------------------------------------------------------------------------------------------------------------------------------------------------------------------------------------------------------------|
| Fatal heart failure                                      | Heart failure leading to death                                                                                                                                                                                                                                                                                                                                                                                                |
| Fatal rupture abdominal aortic aneurysm                  | Rupture abdominal aortic aneurysm followed by death                                                                                                                                                                                                                                                                                                                                                                           |
| Fatal bleeding                                           | Major bleeding leading to death                                                                                                                                                                                                                                                                                                                                                                                               |
| Sudden death                                             | Witnessed death occurring within 1 hour after onset of symptoms, or within 24 hours given convincing circumstantial evidence                                                                                                                                                                                                                                                                                                  |
| Other                                                    | Death without apparent cause in case of cardiovascular history, terminal renal insufficiency, dementia (unless clearly non-vascular), pulmonary haemorrhage*                                                                                                                                                                                                                                                                  |
| <b>Non-vascular mortality</b>                            | Death caused by malignancy, infection, unnatural death or other                                                                                                                                                                                                                                                                                                                                                               |
| <b>All-cause mortality</b>                               | Death from any cause                                                                                                                                                                                                                                                                                                                                                                                                          |
|                                                          | <b>Secondary endpoints</b>                                                                                                                                                                                                                                                                                                                                                                                                    |
| <b>Amputation</b>                                        | Any amputation of a toe or part of the foot or leg due to chronic ischemia. <i>Excluding:</i> traumatic amputations, amputation due to sepsis, amputation of fingers.                                                                                                                                                                                                                                                         |
| <b>Vascular intervention†</b>                            | Percutaneous coronary intervention; coronary artery bypass grafting; carotid endarterectomy, angioplasty or stenting; vertebral artery angioplasty or stenting; vascular surgery or percutaneous transluminal angioplasty of the aorta(bifurcation), iliac arteries, femoral and crural arteries; vascular intervention because of abdominal angina; LVAD. Angioplasty and stenting of other arteries are registered as well. |
| <b>Vascular intervention of an intracranial aneurysm</b> | Coiling or clipping of an intracranial aneurysm                                                                                                                                                                                                                                                                                                                                                                               |

\* In accordance with Antiplatelets Trialists' Collaboration, Lancet 2002

† Excluding interventions already planned before or at inclusion, but including re-interventions and complications of an intervention already planned before or at inclusion.

Anti-GAD, antibodies to glutamic acid decarboxylase; BARC; Bleeding Academic Research Consortium; BMI, body mass index; CABG, coronary artery bypass grafting; CKD, chronic kidney disease; CT, computed tomography; ECG, electrocardiogram; eGFR, estimated glomerular filtration rate; Hb, haemoglobin; KDIGO, Kidney Disease Improving Global Outcomes; LVAD, left ventricular assist device; LVEF, left ventricular ejection fraction; MRI, magnetic resonance imaging; NSTEMI, non-ST-elevation myocardial infarction; PCI, percutaneous coronary intervention; STEMI, ST-elevation myocardial infarction

Supplementary Table 6. Substudies of UCC-SMART

| Substudy                                                                                                    | Period in which the patients were included | N                                                       | Aim                                                                                                                                                                                                                                                                | Key publications                                                                                                            | Additional measurements within substudy                                                                                                                                                                                                                                                                          |
|-------------------------------------------------------------------------------------------------------------|--------------------------------------------|---------------------------------------------------------|--------------------------------------------------------------------------------------------------------------------------------------------------------------------------------------------------------------------------------------------------------------------|-----------------------------------------------------------------------------------------------------------------------------|------------------------------------------------------------------------------------------------------------------------------------------------------------------------------------------------------------------------------------------------------------------------------------------------------------------|
| <b>ARTEMIS</b><br>( <i>ARTE</i> rial calcifications of the <i>Media</i> and <i>Intima</i> in <i>SMART</i> ) | 2015 - 2017                                | 520                                                     | 1) To determine whether intima and media calcification differ in their respective associated CVD risks. 2) To elucidate which risk factors and mechanisms lead to the development of these respective types of calcification and in turn to cardiovascular disease | - Zwakenberg, 2020, PloS One <sup>6</sup><br>- Hoek, 2021, Atherosclerosis <sup>7</sup>                                     | <u>Technique</u> : unenhanced thin-slice CT-scan of the legs (femoral head to feet)<br><u>Measurement</u> : calcification in the femoral and crural arteries scored as absent, predominant intimal arterial calcification, predominant medial arterial calcification or indistinguishable; calcification volume. |
| <b>Athero-Express</b><br><i>Added to UCC-SMART study in June 2022</i>                                       | 2002 - present                             | Patients undergoing a femoral or carotid endarterectomy | To investigate the value of plaque characteristics in relation to cardiovascular outcomes                                                                                                                                                                          | Verhoeven, 2004, Eur J Epidemiology <sup>8</sup>                                                                            | During surgery, the atherosclerotic plaque is collected and immunohistochemically stained in order to assess fat, collagen, macrophages and smooth muscle cells                                                                                                                                                  |
| <b>BEST</b><br>( <i>BEtter risk factor treatment with STructured agreement</i> )<br>RCT                     | 2004 - 2006                                | 197 patients with at least 2 modifiable risk factors    | To investigate whether a clearly written agreement on risk factor management between general practitioners and hospital improved the vascular risk profile of high-risk patients compared with usual care after 1 year                                             | Brouwer, B.G. 2008. SMART risk factor screening in patients at high vascular risk. Utrecht University, Utrecht <sup>9</sup> | NA                                                                                                                                                                                                                                                                                                               |
| <b>Brown adipose tissue</b>                                                                                 | 2014 – 2016                                | 50 patients with clinically manifest CVD                | 1) To evaluate and optimize a protocol for quantifying brown adipose tissue with MRI and to assess BAT volume per patient. 2) To evaluate the reproducibility of MRI by determining inter-scan, intra-observer and inter-observer variability in BAT volume        | - Franssens, 2016, NMR Biomed <sup>10</sup><br>- Franssens, 2017, J Magn. Reson. Imaging <sup>11</sup>                      | <u>Technique</u> : 1.5T water-fat MRI of supraclavicular and subcutaneous adipose tissue<br><u>Measurement</u> : fat signal fraction value, representative of the amount of triglycerides, intracellular water content and capillary                                                                             |



|                                                                                                  |             |                                                                                                                                                                         |                                                                                                                                                                                                                                                                                                                                                                                                                                                                                                  |                                                                                                 |                                                                                                                                                                                                                                                                                                                                                                                                                            |
|--------------------------------------------------------------------------------------------------|-------------|-------------------------------------------------------------------------------------------------------------------------------------------------------------------------|--------------------------------------------------------------------------------------------------------------------------------------------------------------------------------------------------------------------------------------------------------------------------------------------------------------------------------------------------------------------------------------------------------------------------------------------------------------------------------------------------|-------------------------------------------------------------------------------------------------|----------------------------------------------------------------------------------------------------------------------------------------------------------------------------------------------------------------------------------------------------------------------------------------------------------------------------------------------------------------------------------------------------------------------------|
|                                                                                                  |             |                                                                                                                                                                         |                                                                                                                                                                                                                                                                                                                                                                                                                                                                                                  |                                                                                                 | density, of supraclavicular and subcutaneous adipose tissue                                                                                                                                                                                                                                                                                                                                                                |
| <b>DISH</b><br>(Diffuse idiopathic skeletal hyperostosis)                                        | 1996 – 2018 | 4,791 (all patients from SMART with chest X-ray within 3 months of inclusion)                                                                                           | N.A.                                                                                                                                                                                                                                                                                                                                                                                                                                                                                             | - Harlianto, 2021, Rheumatology <sup>12</sup><br>- Harlianto, 2021, J. Pers. Med. <sup>13</sup> | <i>Technique: Chest X-ray within three months of inclusions (if available in routine clinical care)</i>                                                                                                                                                                                                                                                                                                                    |
|                                                                                                  |             |                                                                                                                                                                         |                                                                                                                                                                                                                                                                                                                                                                                                                                                                                                  |                                                                                                 | <u>Measurement:</u> X-rays were scored for DISH using the Resnick criteria. <sup>14</sup> DISH is classified following the presence of ossification of at least four contiguous vertebrae; (relative) preservation of the intervertebral disc height; and the absence of apophyseal joint bony ankylosis or sacroiliac joint erosion. Thoracic aortic calcification subjective score as absent, mild, moderate and severe. |
| <b>IRIS</b><br>(Internet-based vascular Risk factor Intervention and Self-management)<br><br>RCT | 2008 - 2010 | 330 patients with a recent clinical manifestation of atherosclerosis of CAD, CeVD or PAD and with ≥ 2 treatable risk factors not at goal (from UMC Utrecht + Rijnstate) | 1) To evaluate whether an internet-based vascular risk factor management program promoting self-efficacy on top of usual care is more effective than usual care alone in reducing vascular risk factors in patients with a recent clinical manifestation of a vascular disease.<br>2) To evaluate whether an internet-based vascular risk factor management program for reducing vascular risk factors in patients with a recent clinical manifestation of a vascular disease is cost-effective. | - Vernooij, 2012, BMJ <sup>15</sup><br>- Greving, 2015, BMJ Open <sup>16</sup>                  | NA                                                                                                                                                                                                                                                                                                                                                                                                                         |

|                                                                                                                                                   |                |                                                                                                                                              |                                                                                                                                                                                                                                                                      |                                                                                                                                                          |                                                                                                                                                                                                                       |
|---------------------------------------------------------------------------------------------------------------------------------------------------|----------------|----------------------------------------------------------------------------------------------------------------------------------------------|----------------------------------------------------------------------------------------------------------------------------------------------------------------------------------------------------------------------------------------------------------------------|----------------------------------------------------------------------------------------------------------------------------------------------------------|-----------------------------------------------------------------------------------------------------------------------------------------------------------------------------------------------------------------------|
| <p><b>RULE</b><br/>(<i>Risk management in Utrecht and Leiden Evaluation study</i>)</p> <p>Two-centre parallel-group comparative investigation</p> | 2005 - 2007    | 604 patients with CAD, CeVD, PAD or T2DM from UMC Utrecht (+ 566 patients from LUMC)                                                         | To assess risk factor status after referral in patients with established vascular disease or type 2 diabetes who took part in the multidisciplinary hospital-based vascular screening program SMART, compared with a group who did not participate in such a program | Brouwer, 2010, J of Int Med <sup>17</sup>                                                                                                                | NA                                                                                                                                                                                                                    |
| <p><b>Small aneurysms trial (AAA)</b></p>                                                                                                         | 1996 - 2005    | 230 patients with an initial AAA diameter of 30-55mm, who were examined by $\geq 2$ AAA diameter measurements and with $\geq 6$ months of FU | To estimate overall rupture rates of small AAAs and to investigate a predefined set of demographic characteristics and cardiovascular risk factors for association with AAA growth                                                                                   | Schlosser, 2008, J Vasc Surg <sup>18</sup>                                                                                                               | <p><u>Technique:</u> Ultrasound scanning of the aorta</p> <p><u>Measurement:</u> AAA diameter and change with initial AAA diameter</p>                                                                                |
| <p><b>SMART-2</b></p>                                                                                                                             | 2007 - present | 1794 patients with a history of CVD or diabetes, a median of 9.9 years after inclusion in UCC-SMART                                          | To study the course of atherosclerosis and vascular risk factors over time, and to evaluate the effects of treatment in the past                                                                                                                                     |                                                                                                                                                          | NA                                                                                                                                                                                                                    |
| <p><b>SMART HEART</b></p>                                                                                                                         | 1996 - 2006    | 536 patients with $\geq 3$ years hypertension, but free of known coronary or                                                                 | To detect patient characteristics related to the development of LVH with special focus on the detection of SNPs that confer an increased susceptibility for the development of LVH, and thus, heart failure                                                          | <p>- Meijs, 2007, Neth Heart J<sup>19</sup></p> <p>- Meijs, 2009, Eur J Prev Cardiol<sup>20</sup></p> <p>- Vernooij, 2012, Am J Cardiol<sup>21</sup></p> | <p><u>Technique:</u> 1.5T cardiac MRI and delayed-enhancement cardiac MRI</p> <p><u>Measurement:</u> LV mass, LV-end diastolic and end-systolic volumes and left atrial volumes; areas of hyperintense myocardium</p> |

|                                                           |                                                                                                 |                                                 |                                                                                                                                                                                                                                                                                                                  |                                                                                                                                                                                                                                                                                      |                                                                                                                                                                                                                                                                                                                       |
|-----------------------------------------------------------|-------------------------------------------------------------------------------------------------|-------------------------------------------------|------------------------------------------------------------------------------------------------------------------------------------------------------------------------------------------------------------------------------------------------------------------------------------------------------------------|--------------------------------------------------------------------------------------------------------------------------------------------------------------------------------------------------------------------------------------------------------------------------------------|-----------------------------------------------------------------------------------------------------------------------------------------------------------------------------------------------------------------------------------------------------------------------------------------------------------------------|
|                                                           |                                                                                                 | valvular disease                                |                                                                                                                                                                                                                                                                                                                  | - De Beus, 2015, Eur J Clin Invest <sup>22</sup>                                                                                                                                                                                                                                     | classified as myocardial scar tissue (used to assess the presence of unrecognized myocardial infarction). Infarct size was quantified as scar mass relative to LV mass.                                                                                                                                               |
| <b>SMART Inform</b><br>Three-armed hypothesis-blinded RCT | 2017 - 2018                                                                                     | 303 patients with stable CVD and using a statin | To determine whether communicating personalized statin therapy-effects obtained by prognostic algorithm leads to lower decisional conflict associated with statin use in patients with stable CVD compared with standard (non-personalized) therapy-effects                                                      | Jaspers, 2021, BMJ Open <sup>23</sup>                                                                                                                                                                                                                                                | NA                                                                                                                                                                                                                                                                                                                    |
| <b>SMART-Junior</b>                                       | Questionnaires sent between 2009-2013 to patients who were included between 2001 and 2012       | 4,270 (10,564 children)                         | 1) To investigate the presence of cardiovascular risk factors and vascular disease in offspring of patients participating in the SMART cohort. 2) To identify a risk profile of the parent prognostic for the development of traditional cardiovascular risk factors or cardiovascular events in their children. | - Weijmans, 2015, Int J Cardiol <sup>24</sup><br>- Weijmans, 2015, Am Heart J <sup>25</sup>                                                                                                                                                                                          | - Questions about CV risk factors (incl. dates of risk factor diagnoses): presence of diabetes, hypertension, hypercholesterolemia, smoking behaviour and present weight of the offspring<br>- Questions about CVD (incl. dates of occurrence): whether offspring had experienced MI, PCI, CABG, stroke, PAD, or AAA. |
| <b>SMART-MR and SMART Medea</b>                           | 2001 - 2005<br><br>1 <sup>st</sup> follow-up: 2006-2009<br>2 <sup>nd</sup> follow-up: 2013-2017 | 1,309                                           | To investigate brain changes using 1.5T MRI in patients with symptomatic atherosclerotic disease (and 7T MRI in follow-up from 2013-2017)                                                                                                                                                                        | - Geerlings, 2010, Atherosclerosis <sup>26</sup><br>- Muller, 2011, Ann Neurol <sup>27</sup><br>- Conijn, 2011, Stroke <sup>28</sup><br>- Kloppenborg, 2012, Neurology <sup>29</sup><br>- Jochemsen 2013, JAMA Neurology <sup>30</sup><br>- Van der Veen, 2015, Stroke <sup>31</sup> | <u>Technique:</u><br>- 1.5T brain MRI<br>- 7T brain MRI<br><br><u>Measurement:</u><br>- Total cerebral blood flow (mL/min per 100 mL brain parenchymal volume)<br>- White matter lesions: volume (mL), shape (using the concavity index and fractal dimension <sup>35</sup> ) and location were scored                |

|                                                                                                                                  |                       |                                                                                        |                                                                                                                                                                                                                                            |                                                                                                                                                                         |                                                                                                                                                                                                                                                                                                                                                                                                                                                                                                                                                                                                                                                                                                                                                                                                                                                                                                                                                                                                                                                                                                                                                                                                                                                                                               |
|----------------------------------------------------------------------------------------------------------------------------------|-----------------------|----------------------------------------------------------------------------------------|--------------------------------------------------------------------------------------------------------------------------------------------------------------------------------------------------------------------------------------------|-------------------------------------------------------------------------------------------------------------------------------------------------------------------------|-----------------------------------------------------------------------------------------------------------------------------------------------------------------------------------------------------------------------------------------------------------------------------------------------------------------------------------------------------------------------------------------------------------------------------------------------------------------------------------------------------------------------------------------------------------------------------------------------------------------------------------------------------------------------------------------------------------------------------------------------------------------------------------------------------------------------------------------------------------------------------------------------------------------------------------------------------------------------------------------------------------------------------------------------------------------------------------------------------------------------------------------------------------------------------------------------------------------------------------------------------------------------------------------------|
|                                                                                                                                  |                       |                                                                                        |                                                                                                                                                                                                                                            | <p>- Zwartbol, 2019, Stroke<sup>32</sup><br/>                 - Ghaznawi 2021, Neurology<sup>33</sup><br/>                 - Rissanen, 2021, Neurology<sup>34</sup></p> | <p>- Brain parenchymal fraction (% of intracranial volume (ICV) that is occupied by brain tissue), an indicator for global brain atrophy<br/>                 - Ventricular enlargement (% of ventricular volume of the total ICV), an indicator for subcortical brain atrophy<br/>                 - Cortical gray matter fraction (% cortical gray matter volume of the total ICV), an indicator of cortical brain atrophy<br/>                 - Infarcts: location, affected flow territory and type were scored</p> <p><u>Neuropsychological assessment (from 2003):</u><br/>                 - 15-learning word test<sup>36</sup><br/>                 - Rey-Osterrieth Complex Figure test<sup>37</sup><br/>                 - Visual Elevator test<sup>38</sup><br/>                 - Brixton Spatial Anticipation test<sup>39</sup><br/>                 - Verbal Fluency test (letter)<sup>40</sup><br/>                 - Dutch version of the National Adult Reading test<sup>41</sup></p> <p><u>From 2006:</u><br/>                 - MMSE<sup>42</sup><br/>                 - Verbal Fluency test (animals)<sup>40</sup><br/>                 - Digit Symbol Substitution Test<sup>43</sup><br/>                 - Forward Digit Span and Backward Digit Span<sup>44</sup></p> |
| <p><b>SMART-ORACLE</b><br/> <i>(Optimizing Risk Assessment with CT-angiography or Calcium score in patients at high risk</i></p> | <p>2012 - present</p> | <p>1.182 (until Dec 2021; ongoing) patients with a history of symptomatic vascular</p> | <p>1) To determine whether there is additional value of performing CAC score, CTCA, total aorta calcification, burden as compared to traditional risk factors in the risk stratification in predicting any cardiovascular event. 2) To</p> | <p>- Franssens, 2017, Eur J of Prev Cardiol<sup>45</sup><br/>                 - Van 't Klooster, 2020, IJC Heart &amp; Vasculature<sup>46</sup></p>                     | <p><u>Technique:</u> Cardiac non-contrast enhanced CT and CTA of the heart and the carotids to the circle of Willis</p>                                                                                                                                                                                                                                                                                                                                                                                                                                                                                                                                                                                                                                                                                                                                                                                                                                                                                                                                                                                                                                                                                                                                                                       |

|                                                                                                                                         |                                                         |                                                                                                                                                                  |                                                                                                                                                                                                                                                                                                                                                                                                                                |                                                                                                   |                                                                                                                                                                                                                                                                                                                                                                                |
|-----------------------------------------------------------------------------------------------------------------------------------------|---------------------------------------------------------|------------------------------------------------------------------------------------------------------------------------------------------------------------------|--------------------------------------------------------------------------------------------------------------------------------------------------------------------------------------------------------------------------------------------------------------------------------------------------------------------------------------------------------------------------------------------------------------------------------|---------------------------------------------------------------------------------------------------|--------------------------------------------------------------------------------------------------------------------------------------------------------------------------------------------------------------------------------------------------------------------------------------------------------------------------------------------------------------------------------|
| <i>for a cardiovascular event)</i>                                                                                                      |                                                         | disease, T2DM or hypertension                                                                                                                                    | estimate the additional value of CTCA and CAC score on top of traditional risk factors in predicting cardiac events. 3) To determine the value of soft plaque burden in the carotid and coronary arteries in predicting acute vascular events                                                                                                                                                                                  |                                                                                                   | <u>Measurement:</u><br>- Radiodensity and volume of epicardial adipose tissue<br>- Coronary artery calcium (scored using the Agatston method <sup>47</sup> )<br>- Calcifications on heart valves and in the thoracic aorta (quantified using a pseudo-mass score: mean calcium hounsfield units × region of interest volume)<br>- CAD-RADS <sup>48</sup><br>- Carotid stenosis |
| <b>SPAIN</b><br><i>(Selfmanagement of vascular Patients Activated by Internet and Nurses)</i>                                           | 2005                                                    | 50 patients with computer facilities                                                                                                                             | 1) To evaluate the feasibility of an Internet-based vascular risk reduction program in terms of accessibility, frequency and pattern of use of an individualized website for patients with a recent clinical manifestation of arterial disease. 2) To evaluate whether the use was related to a change in vascular risk factors after 6 months                                                                                 | Goessens, 2008, Patient education and counseling <sup>49</sup>                                    | NA                                                                                                                                                                                                                                                                                                                                                                             |
| <b>TEMPUS</b><br><i>(The Evening versus Morning Polypill Utilization Study)</i><br><br>Randomized open blinded endpoint crossover trial | 1996 - 2009. Patients were screened between 2012 - 2013 | 78 patients with established CVD or those at intermediate to high risk of CVD with indication for the use of cardiovascular medication, according to the current | 1) To assess whether there is a difference in the morning or evening administration of a cardiovascular polypill, an FDC formulation containing aspirin, simvastatin, lisinopril and hydrochlorothiazide, on LDL-C and mean 24-hour systolic BP levels in individuals at high risk of cardiovascular disease. 2) To assess the effect of the polypill on LDL-C, ambulatory BP, anti-platelet function, adherence and patients' | - Lafeber, 2014, Eur J Prev Cardiol <sup>50</sup><br>- Lafeber, 2014, Int J Cardiol <sup>51</sup> | At baseline and at the end of each treatment period: medical history, anthropometric parameters, laboratory blood tests, office BP, 24-hour ambulatory BP monitoring, platelet function, pulse wave analysis, adherence to therapy, and questionnaires                                                                                                                         |

|                                                                         |                                                     |                                                    |                                                                                                                                                                                                        |                                                                                                           |                                                                                                                                                                                                                                                                                                                                         |
|-------------------------------------------------------------------------|-----------------------------------------------------|----------------------------------------------------|--------------------------------------------------------------------------------------------------------------------------------------------------------------------------------------------------------|-----------------------------------------------------------------------------------------------------------|-----------------------------------------------------------------------------------------------------------------------------------------------------------------------------------------------------------------------------------------------------------------------------------------------------------------------------------------|
|                                                                         |                                                     | Dutch guidelines                                   | preference as compared to the administration of the individual, identically dosed components of the polypill administered at different times of the day, as is currently recommended in clinical care. |                                                                                                           |                                                                                                                                                                                                                                                                                                                                         |
| <b>VENUS</b><br><i>(Vascular prEvention by Nurses Study)</i><br><br>RCT | Patients included between May 2002 and October 2003 | 236 patients with $\geq 2$ modifiable risk factors | To investigate whether risk factor management in the hospital improved with nurse practitioner care plus usual care compared with usual care                                                           | - Goessens, 2006, Eur J Cardiovasc Prev Rehabil <sup>52</sup><br>- Sol, 2009, Eur J C Nurse <sup>53</sup> | Questionnaire about social support using a social support questionnaire for Dutch CHD patients:<br>- Structural support: whether they have a spouse and whether they have someone they could turn to about their health problems<br>- Functional support: statements about active involvement, protective buffering and overprotection. |

AAA, aortic abdominal aneurysm; BAT, brown adipose tissue; BP, blood pressure; CABG, coronary artery bypass grafting; CAC, coronary artery calcium; CAD, coronary artery disease, CAD-RADS, CAD-reporting and data system, CeVD, cerebrovascular disease; CHD, coronary heart disease; CT, computed tomography; CTA, CT angiography; CTCA, CT coronary angiography; CV, cardiovascular; CVD, cardiovascular disease; DISH, diffuse idiopathic skeletal hyperostosis; FDC, fixed dose combination; FU, follow-up; LDL-c, low-density lipoprotein cholesterol; LUMC, Leiden University Medical Center; LV, left ventricle; LVH, left ventricle hypertrophy; MI, myocardial infarction; MRI, magnetic resonance imaging; NA, not applicable; PAD, peripheral artery disease; PCI, percutaneous coronary intervention; RCT, randomized controlled trial; SMART, Second Manifestations of Arterial Disease; SNP; single nucleotide polymorphism; T2DM, type 2 diabetes mellitus; UCC-SMART, Utrecht Cardiovascular Cohort-SMART; UMC, University Medical Center

**Supplementary Table 7. Baseline characteristics of participants with complete follow-up and participants without complete follow-up**

|                                      | <b>Participants with complete follow-up (n = 13,284)</b> | <b>Participants without complete follow-up (n = 1,546)</b> |
|--------------------------------------|----------------------------------------------------------|------------------------------------------------------------|
| Age (years)                          | 57 ± 12                                                  | 55 ± 14                                                    |
| Male sex                             | 8,736 (66)                                               | 894 (57)                                                   |
| Previous or current smoking          | 9,285 (70)                                               | 1,065 (69)                                                 |
| Established cardiovascular disease   | 8,270 (65)                                               | 913 (59)                                                   |
| Diabetes mellitus                    | 2,272 (17)                                               | 336 (22)                                                   |
| Lipid-lowering therapy               | 7,529 (57)                                               | 724 (47)                                                   |
| Antihypertensive therapy             | 9,053 (68)                                               | 977 (63)                                                   |
| Oral anticoagulant therapy           | 1,145 (9)                                                | 121 (8)                                                    |
| Systolic blood pressure (mmHg)       | 140 ± 22                                                 | 144 ± 23                                                   |
| Diastolic blood pressure (mmHg)      | 83 ± 13                                                  | 84 ± 13                                                    |
| Body mass index (kg/m <sup>2</sup> ) | 26.9 ± 4.4                                               | 27.1 ± 4.8                                                 |
| Non-HDL-cholesterol (mmol/L)         | 3.8 ± 1.3                                                | 4.0 ± 1.5                                                  |
| eGFR (ml/min/1.73 m <sup>2</sup> )   | 53 ± 41                                                  | 48 ± 43                                                    |
| HbA1c (mmol/mol)                     | 38 (36 - 42)                                             | 40 (36 - 48)                                               |
| CRP (mg/L)                           | 2.0 (1.0 - 4.3)                                          | 2.2 (1.0 - 4.4)                                            |

Data are presented as number (percentage), mean ± standard difference or median (interquartile range).

Supplemental Figure 1. Timeline of substudies of UCC-SMART

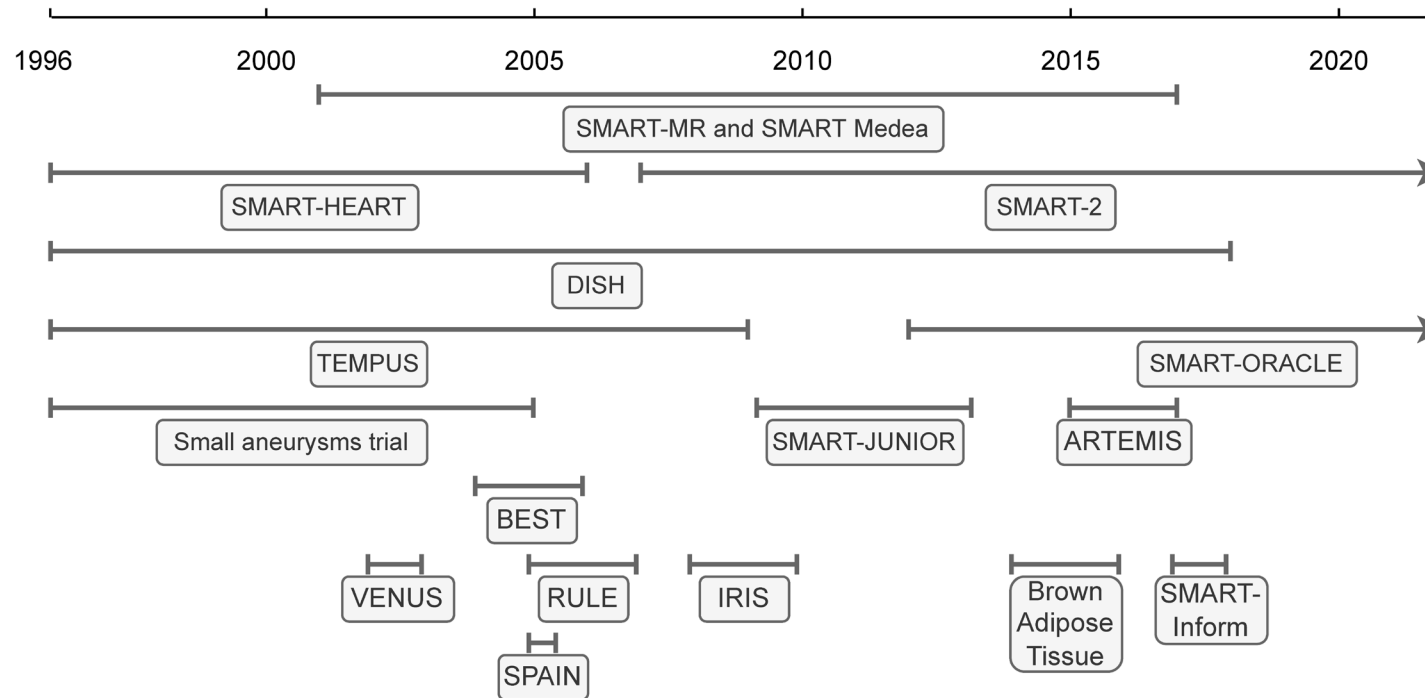

1.5T brain MRIs have been performed between 2001 and 2005. Follow-up of 1.5T MRI was performed between 2006 and 2009 and from 2013 to 2017. During the second follow-up, a 7T brain MRI was added in a subsample. A detailed overview of the substudies is provided in Supplementary Table 5.

ARTEMIS, ARTERial calcifications of the Media and Intima in SMART (Second Manifestations of Arterial Disease)<sup>6</sup>; BEST, BETter risk factor treatment with STructured agreement<sup>9</sup>; Brown Adipose Tissue<sup>10</sup>; DISH, Diffuse idiopathic skeletal hyperostosis<sup>12</sup>; IRIS, Internet-based vascular Risk factor Intervention and Self-management<sup>15</sup>; RULE, Risk management in Utrecht and Leiden Evaluation study<sup>17</sup>; SMART HEART<sup>19</sup>; SMART Inform<sup>23</sup>; SMART-JUNIOR<sup>24</sup>; SMART-MR<sup>26</sup>; ORACLE; Optimizing Risk Assessment with CT-angiography or Calcium score in patients at high risk for a cardiovascular event<sup>45</sup>; SPAIN,



1  
2  
3  
4  
5  
6  
7  
8  
9  
10  
11  
12  
13  
14  
15  
16  
17  
18  
19  
20  
21  
22  
23  
24  
25  
26  
27  
28  
29  
30  
31  
32  
33  
34  
35  
36  
37  
38  
39  
40  
41  
42  
43  
44  
45  
46

Self-management of vascular Patients Activated by Internet and Nurses<sup>49</sup>; TEMPUS, The Evening versus Morning Polypill Utilization Study<sup>50</sup>; VENUS, Vascular prEvention by NURses Study<sup>52</sup>.

For peer review only

## References

1. van Swieten JC, Koudstaal PJ, Visser MC, Schouten HJ, van Gijn J. Interobserver agreement for the assessment of handicap in stroke patients. *Stroke*. 1988 May;19(5):604–7.
2. Brown MA, Magee LA, Kenny LC, Karumanchi SA, McCarthy FP, Saito S, et al. Hypertensive Disorders of Pregnancy. *Hypertension*. 2018 Jul;72(1):24–43.
3. Ware JEJ, Sherbourne CD. The MOS 36-item short-form health survey (SF-36). I. Conceptual framework and item selection. *Med Care*. 1992 Jun;30(6):473–83.
4. Schulman S, Kearon C. Definition of major bleeding in clinical investigations of antihemostatic medicinal products in non-surgical patients. *J Thromb Haemost*. 2005 Apr 4;3(4):692–4.
5. Mehran R, Rao S V, Bhatt DL, Gibson CM, Caixeta A, Eikelboom J, et al. Standardized bleeding definitions for cardiovascular clinical trials: a consensus report from the Bleeding Academic Research Consortium. *Circulation*. 2011 Jun;123(23):2736–47.
6. Zwakenberg SR, De Jong PA, Hendriks EJ, Westerink J, Spiering W, De Borst GJ, et al. Intimal and medial calcification in relation to cardiovascular risk factors. *PLoS One*. 2020;15(7 July):1–14.
7. Hoek AG, Zwakenberg SR, Elders PJM, de Jong PA, Spiering W, Bartstra JW, et al. An elevated ankle-brachial index is not a valid proxy for peripheral medial arterial calcification. *Atherosclerosis*. 2021;323(March):13–9.
8. Verhoeven BAN, Velema E, Schoneveld AH, de Vries JPPM, de Bruin P, Seldenrijk CA, et al. Athero-express: differential atherosclerotic plaque expression of mRNA and protein in relation to cardiovascular events and patient characteristics. Rationale and design. *Eur J Epidemiol*. 2004;19(12):1127–33.
9. Brouwer BG. SMART risk factor screening in patients at high vascular risk [dissertation]. Utrecht University; 2008.
10. Franssens BT, Eikendal AL, Leiner T, van der Graaf Y, Visseren FLJ, Hoogduin JM. Reliability and agreement of adipose tissue fat fraction measurements with water-fat MRI in patients with manifest cardiovascular disease. *NMR Biomed*. 2016;29(1):48–56.
11. Franssens BT, Hoogduin H, Leiner T, van der Graaf Y, Visseren FLJ. Relation between brown adipose tissue and measures of obesity and metabolic dysfunction in patients with cardiovascular disease. *J Magn Reson Imaging*. 2017;46(2):497–504.
12. Harlianto NI, Oosterhof N, Foppen W, Hol ME, Wittenberg R, van der Veen PH, et al. Diffuse idiopathic skeletal hyperostosis is associated with incident stroke in patients with increased cardiovascular risk. *Rheumatology*. 2021;1–8.
13. Harlianto NI, Westerink J, Foppen W, Hol ME, Wittenberg R, Van Der Veen PH, et al. Visceral adipose tissue and different measures of adiposity in different severities of diffuse idiopathic skeletal hyperostosis. *J Pers Med*. 2021;11(7):1–11.
14. Resnick D, Niwayama G. Radiographic and pathologic features of spinal involvement in diffuse idiopathic skeletal hyperostosis (DISH). *Radiology*. 1976 Jun;119(3):559–68.
15. Vernooij WP, Kaasjager HAH, Van Der Graaf Y, Wierdsma J, Grandjean HMH, Hovens MMC, et al. Internet based vascular risk factor management for patients with clinically manifest vascular disease: Randomised controlled trial. *BMJ*. 2012;344(7863):1–13.
16. Greving JP, Kaasjager HAH, Vernooij JWP, Hovens MMC, Wierdsma J, Grandjean HMH, et al. Cost-effectiveness of a nurse-led internet-based vascular risk factor management programme: Economic evaluation alongside a randomised controlled clinical trial. *BMJ Open*. 2015;5(5):1–8.
17. Brouwer BG, Visseren FLJ, Algra A, Van Bockel JH, Bollen ELEM, Doevendans PA, et al. Effectiveness of a hospital-based vascular screening programme (SMART) for risk factor management in patients with established vascular disease or type 2 diabetes: A parallel-group comparative study. *J Intern Med*. 2010;268(1):83–93.
18. Schlösser FJV, Tangelder MJD, Verhagen HJM, van der Heijden GJMG, Muhs BE, van der Graaf Y, et al. Growth predictors and prognosis of small abdominal aortic aneurysms. *J Vasc Surg*. 2008;47(6):1127–33.
19. Meijs MFL, Bots ML, Voncken EJA, Cramer MJM, Melman PG, Velthuis BK, et al. Rationale and design of the SMART Heart study. *Netherlands Hear J*. 2007;15(9):295–8.

- 1
  - 2
  - 3
  - 4
  - 5
  - 6
  - 7
  - 8
  - 9
  - 10
  - 11
  - 12
  - 13
  - 14
  - 15
  - 16
  - 17
  - 18
  - 19
  - 20
  - 21
  - 22
  - 23
  - 24
  - 25
  - 26
  - 27
  - 28
  - 29
  - 30
  - 31
  - 32
  - 33
  - 34
  - 35
  - 36
  - 37
  - 38
  - 39
  - 40
  - 41
  - 42
  - 43
  - 44
  - 45
  - 46
  - 47
  - 48
  - 49
  - 50
  - 51
  - 52
  - 53
  - 54
  - 55
  - 56
  - 57
  - 58
  - 59
  - 60
20. Meijls MF I., Vergouwe Y, Cramer MJ m., Vonken EJA, Velthuis BK, Verton DJ, et al. A prediction model for left ventricular mass in patients at high cardiovascular risk. *Eur J Prev Cardiol.* 2010;17(6):621–7.
21. Vernooij JWP, Cramer MJM, Visseren FLJ, Korndewal MJ, Bots ML, Meijls MFL, et al. Relation between abdominal obesity, insulin resistance and left ventricular hypertrophy diagnosed by electrocardiogram and magnetic resonance imaging in hypertensive patients. *Am J Cardiol.* 2012;110(2):227–33.
22. de Beus E, Meijls MFL, Bots ML, Visseren FLJ, Blankestijn PJ, Algra A, et al. Presence of albuminuria predicts left ventricular mass in patients with chronic systemic arterial hypertension. *Eur J Clin Invest.* 2015;45(6):550–6.
23. Jaspers NEM, Visseren FLJ, Van Der Graaf Y, Smulders YM, Damman OC, Brouwers C, et al. Communicating personalised statin therapy-effects as 10-year CVD-risk or CVD-free life-expectancy: Does it improve decisional conflict? Three-armed, blinded, randomised controlled trial. *BMJ Open.* 2021;11(7):1–8.
24. Weijmans M, Van Der Graaf Y, De Borst GJ, Asselbergs FW, Cramer MJ, Algra A, et al. Prevalence and risk of cardiovascular risk factors and events in offspring of patients at high vascular risk and effect of location of parental vascular disease. *Int J Cardiol.* 2015;195:195–202.
25. Weijmans M, Van Der Graaf Y, De Borst GJ, Asselbergs FW, Cramer MJ, Algra A, et al. The relation between the presence of cardiovascular disease and vascular risk factors in offspring and the occurrence of new vascular events in their parents already at high vascular risk. *Am Heart J.* 2015;170(4):744–752.e2.
26. Geerlings MI, Appelman APA, Vincken KL, Algra A, Witkamp TD, Mali WPTM, et al. Brain volumes and cerebrovascular lesions on MRI in patients with atherosclerotic disease. The SMART-MR study. *Atherosclerosis.* 2010;210(1):130–6.
27. Muller M, Van Der Graaf Y, Algra A, Hendrikse J, Mali WP, Geerlings MI. Carotid atherosclerosis and progression of brain atrophy: The SMART-MR Study. *Ann Neurol.* 2011;70(2):237–44.
28. Conijn MMA, Kloppenborg RP, Algra A, Mali WPTM, Kappelle LJ, Vincken KL, et al. Cerebral small vessel disease and risk of death, ischemic stroke, and cardiac complications in patients with atherosclerotic disease: The second manifestations of arterial disease-magnetic resonance (SMART-MR) study. *Stroke.* 2011;42(11):3105–9.
29. Kloppenborg RP, Geerlings MI, Visseren FL, Mali WPTM, Vermeulen M, Van Der Graaf Y, et al. Homocysteine and progression of generalized small-vessel disease :The SMART-MR study. *Neurology.* 2014;82(9):777–83.
30. Jochemsen HM, Muller M, Visseren FL, Scheltens P, Vincken KL, Mali WP, et al. Blood pressure and progression of brain atrophy the SMART-MR study. *JAMA Neurol.* 2013;70(8):1046–53.
31. Van Der Veen PH, Muller M, Vincken KL, Hendrikse J, Mali WPTM, Van Der Graaf Y, et al. Longitudinal Relationship between Cerebral Small-Vessel Disease and Cerebral Blood Flow. *Stroke.* 2015;46(5):1233–8.
32. Zwartbol MHT, Van Der Kolk AG, Ghaznawi R, Van Der Graaf Y, Hendrikse J, Geerlings MI, et al. Intracranial Vessel Wall Lesions on 7T MRI (Magnetic Resonance Imaging): Occurrence and Vascular Risk Factors: The SMART-MR Study. *Stroke.* 2019;50(1):88–94.
33. Ghaznawi R, Geerlings MI, Jaarsma-Coes M, Hendrikse J, de Bresser J. Association of White Matter Hyperintensity Markers on MRI and Long-term Risk of Mortality and Ischemic Stroke: The SMART-MR Study. *Neurology.* 2021;96(17):e2172–83.
34. Rissanen I, Lucci C, Ghaznawi R, Hendrikse J, Kappelle LJ, Geerlings MI. Association of Ischemic Imaging Phenotype With Progression of Brain Atrophy and Cerebrovascular Lesions on MRI: The SMART-MR Study. *Neurology.* 2021;97(11):e1063–74.
35. Ghaznawi R, Geerlings MI, Jaarsma-Coes MG, Zwartbol MHT, Kuijf HJ, van der Graaf Y, et al. The association between lacunes and white matter hyperintensity features on MRI: The SMART-MR study. *J Cereb Blood Flow Metab.* 2019;39(12):2486–96.
36. Brand N, Jolles J. Learning and Retrieval Rate of Words Presented Auditorily and Visually. *J Gen Psychol.* 1985 Apr 1;112(2):201–10.

- 1
- 2
- 3 37. Osterrieth PA. Le test de copie d'une figure complexe; contribution à l'étude de la perception
- 4 et de la mémoire. [Test of copying a complex figure; contribution to the study of perception
- 5 and memory.]. *Arch Psychol (Geneve)*. 1944;30:206–356.
- 6 38. Robertson IH, Ward T, Ridgeway V, Nimmo-Smith I. The structure of normal human
- 7 attention: The Test of Everyday Attention. *J Int Neuropsychol Soc*. 1996 Nov;2(6):525–34.
- 8 39. Burgess PW, Shallice T. Bizarre responses, rule detection and frontal lobe lesions. *Cortex*.
- 9 1996 Jun;32(2):241–59.
- 10 40. Wilkins AJ, Shallice T, McCarthy R. Frontal lesions and sustained attention.
- 11 *Neuropsychologia*. 1987;25(2):359–65.
- 12 41. Schmand B, Geerlings MI, Jonker C, Lindeboom J. Reading ability as an estimator of
- 13 premorbid intelligence: does it remain stable in emergent dementia? *J Clin Exp Neuropsychol*.
- 14 1998 Feb;20(1):42–51.
- 15 42. Folstein MF, Folstein SE, McHugh PR. "Mini-mental state". A practical method for grading
- 16 the cognitive state of patients for the clinician. *J Psychiatr Res*. 1975 Nov;12(3):189–98.
- 17 43. Lezak MD, Howieson DB, Loring DW, Fischer JS. *Neuropsychological assessment*. Oxford
- 18 University Press, USA; 2004.
- 19 44. Wechsler D. Wechsler adult intelligence scale. *Arch Clin Neuropsychol*. 1955;
- 20 45. Franssens BT, Nathoe HM, Leiner T, Van Der Graaf Y, Visseren FLJ. Relation between
- 21 cardiovascular disease risk factors and epicardial adipose tissue density on cardiac computed
- 22 tomography in patients at high risk of cardiovascular events. *Eur J Prev Cardiol*.
- 23 2017;24(6):660–70.
- 24 46. van 't Klooster CC, Nathoe HM, Hjortnaes J, Bots ML, Isgum I, Lessmann N, et al. Multifocal
- 25 cardiovascular calcification in patients with established cardiovascular disease; prevalence, risk
- 26 factors, and relation with recurrent cardiovascular disease. *IJC Hear Vasc*. 2020;27:100499.
- 27 47. Agatston AS, Janowitz WR, Hildner FJ, Zusmer NR, Viamonte MJ, Detrano R. Quantification
- 28 of coronary artery calcium using ultrafast computed tomography. *J Am Coll Cardiol*. 1990
- 29 Mar;15(4):827–32.
- 30 48. Cury RC, Abbara S, Achenbach S, Agatston A, Berman DS, Budoff MJ, et al. Coronary Artery
- 31 Disease - Reporting and Data System (CAD-RADS): An Expert Consensus Document of
- 32 SCCT, ACR and NASCI: Endorsed by the ACC. *JACC Cardiovasc Imaging*. 2016
- 33 Sep;9(9):1099–113.
- 34 49. Goessens BMB, Visseren FLJ, de Nooijer J, van den Borne HW, Algra A, Wierdsma J, et al. A
- 35 pilot-study to identify the feasibility of an Internet-based coaching programme for changing the
- 36 vascular risk profile of high-risk patients. *Patient Educ Couns*. 2008;73(1):67–72.
- 37 50. Lafeber M, Grobbee DE, Bots ML, Thom S, Webster R, Rodgers A, et al. The Evening versus
- 38 Morning Polypill Utilization Study: The TEMPUS rationale and design. *Eur J Prev Cardiol*.
- 39 2014;21(4):425–33.
- 40 51. Lafeber M, Grobbee DE, Schrover IM, Thom S, Webster R, Rodgers A, et al. Comparison of a
- 41 morning polypill, evening polypill and individual pills on LDL-cholesterol, ambulatory blood
- 42 pressure and adherence in high-risk patients; A randomized crossover trial. *Int J Cardiol*.
- 43 2015;181:193–9.
- 44 52. Goessens BMB, Visseren FLJ, Sol BGM, de Man-Van Ginkel JM, Van Der Graaf Y. A
- 45 randomized, controlled trial for risk factor reduction in patients with symptomatic vascular
- 46 disease: The multidisciplinary Vascular Prevention by Nurses Study (VENUS). *Eur J Prev*
- 47 *Cardiol*. 2006;13(6):996–1003.
- 48 53. Sol BGM, van der Graaf Y, Goessens BMB, Visseren FLJ. Social support and change in
- 49 vascular risk factors in patients with clinical manifestations of vascular diseases. *Eur J*
- 50 *Cardiovasc Nurs* [Internet]. 2009;8(2):137–43. Available from:
- 51 <http://dx.doi.org/10.1016/j.ejcnurse.2008.10.005>
- 52
- 53
- 54
- 55
- 56
- 57
- 58
- 59
- 60

STROBE Statement—Checklist of items that should be included in reports of *cohort studies*

|                           | Item No | Recommendation                                                                                                                                                                                                                                                                                                         | Page No |
|---------------------------|---------|------------------------------------------------------------------------------------------------------------------------------------------------------------------------------------------------------------------------------------------------------------------------------------------------------------------------|---------|
| <b>Title and abstract</b> | 1       | (a) Indicate the study's design with a commonly used term in the title or the abstract<br>(b) Provide in the abstract an informative and balanced summary of what was done and what was found                                                                                                                          | 1+3     |
| <b>Introduction</b>       |         |                                                                                                                                                                                                                                                                                                                        |         |
| Background/rationale      | 2       | Explain the scientific background and rationale for the investigation being reported                                                                                                                                                                                                                                   | 5       |
| Objectives                | 3       | State specific objectives, including any prespecified hypotheses                                                                                                                                                                                                                                                       | 5       |
| <b>Methods</b>            |         |                                                                                                                                                                                                                                                                                                                        |         |
| Study design              | 4       | Present key elements of study design early in the paper                                                                                                                                                                                                                                                                | 5+6     |
| Setting                   | 5       | Describe the setting, locations, and relevant dates, including periods of recruitment, exposure, follow-up, and data collection                                                                                                                                                                                        | 6       |
| Participants              | 6       | (a) Give the eligibility criteria, and the sources and methods of selection of participants. Describe methods of follow-up<br>(b) For matched studies, give matching criteria and number of exposed and unexposed                                                                                                      | 6+11-12 |
| Variables                 | 7       | Clearly define all outcomes, exposures, predictors, potential confounders, and effect modifiers. Give diagnostic criteria, if applicable                                                                                                                                                                               | 6-12    |
| Data sources/measurement  | 8*      | For each variable of interest, give sources of data and details of methods of assessment (measurement). Describe comparability of assessment methods if there is more than one group                                                                                                                                   | 6-12    |
| Bias                      | 9       | Describe any efforts to address potential sources of bias                                                                                                                                                                                                                                                              | 6-12    |
| Study size                | 10      | Explain how the study size was arrived at                                                                                                                                                                                                                                                                              | 6-7     |
| Quantitative variables    | 11      | Explain how quantitative variables were handled in the analyses. If applicable, describe which groupings were chosen and why                                                                                                                                                                                           | 16-17   |
| Statistical methods       | 12      | (a) Describe all statistical methods, including those used to control for confounding<br>(b) Describe any methods used to examine subgroups and interactions<br>(c) Explain how missing data were addressed<br>(d) If applicable, explain how loss to follow-up was addressed<br>(e) Describe any sensitivity analyses | n.a.    |
| <b>Results</b>            |         |                                                                                                                                                                                                                                                                                                                        |         |
| Participants              | 13*     | (a) Report numbers of individuals at each stage of study—eg numbers potentially eligible, examined for eligibility, confirmed eligible, included in the study, completing follow-up, and analysed<br>(b) Give reasons for non-participation at each stage<br>(c) Consider use of a flow diagram                        | 16-17   |
| Descriptive data          | 14*     | (a) Give characteristics of study participants (eg demographic, clinical, social) and information on exposures and potential confounders<br>(b) Indicate number of participants with missing data for each variable of interest<br>(c) Summarise follow-up time (eg, average and total amount)                         | 16-17   |
| Outcome data              | 15*     | Report numbers of outcome events or summary measures over time                                                                                                                                                                                                                                                         | 17-18   |

|    |                          |    |                                                                                                                                                                                                              |       |
|----|--------------------------|----|--------------------------------------------------------------------------------------------------------------------------------------------------------------------------------------------------------------|-------|
| 1  | Main results             | 16 | (a) Give unadjusted estimates and, if applicable, confounder-adjusted estimates and their precision (eg, 95% confidence interval). Make clear which confounders were adjusted for and why they were included | 16-18 |
| 2  |                          |    | (b) Report category boundaries when continuous variables were categorized                                                                                                                                    |       |
| 3  |                          |    | (c) If relevant, consider translating estimates of relative risk into absolute risk for a meaningful time period                                                                                             |       |
| 4  |                          |    |                                                                                                                                                                                                              |       |
| 5  |                          |    |                                                                                                                                                                                                              |       |
| 6  |                          |    |                                                                                                                                                                                                              |       |
| 7  |                          |    |                                                                                                                                                                                                              |       |
| 8  |                          |    |                                                                                                                                                                                                              |       |
| 9  | Other analyses           | 17 | Report other analyses done—eg analyses of subgroups and interactions, and sensitivity analyses                                                                                                               | n.a.  |
| 10 |                          |    |                                                                                                                                                                                                              |       |
| 11 | <b>Discussion</b>        |    |                                                                                                                                                                                                              |       |
| 12 |                          |    |                                                                                                                                                                                                              |       |
| 13 | Key results              | 18 | Summarise key results with reference to study objectives                                                                                                                                                     | 18    |
| 14 | Limitations              | 19 | Discuss limitations of the study, taking into account sources of potential bias or imprecision. Discuss both direction and magnitude of any potential bias                                                   | 25-26 |
| 15 |                          |    |                                                                                                                                                                                                              |       |
| 16 | Interpretation           | 20 | Give a cautious overall interpretation of results considering objectives, limitations, multiplicity of analyses, results from similar studies, and other relevant evidence                                   | 25-26 |
| 17 |                          |    |                                                                                                                                                                                                              |       |
| 18 |                          |    |                                                                                                                                                                                                              |       |
| 19 | Generalisability         | 21 | Discuss the generalisability (external validity) of the study results                                                                                                                                        | 25    |
| 20 |                          |    |                                                                                                                                                                                                              |       |
| 21 | <b>Other information</b> |    |                                                                                                                                                                                                              |       |
| 22 | Funding                  | 22 | Give the source of funding and the role of the funders for the present study and, if applicable, for the original study on which the present article is based                                                | 27    |
| 23 |                          |    |                                                                                                                                                                                                              |       |
| 24 |                          |    |                                                                                                                                                                                                              |       |

\*Give information separately for exposed and unexposed groups.

**Note:** An Explanation and Elaboration article discusses each checklist item and gives methodological background and published examples of transparent reporting. The STROBE checklist is best used in conjunction with this article (freely available on the Web sites of PLoS Medicine at <http://www.plosmedicine.org/>, Annals of Internal Medicine at <http://www.annals.org/>, and Epidemiology at <http://www.epidem.com/>). Information on the STROBE Initiative is available at <http://www.strobe-statement.org>.

# BMJ Open

## Cohort profile: the Utrecht Cardiovascular Cohort – Second Manifestations of Arterial Disease (UCC-SMART) study – an ongoing prospective cohort study of patients at high cardiovascular risk in the Netherlands

|                               |                                                                                                                                                                                                                                                                                                                                                                                                                                                                                                                                                                                                                                                                                                                                                                                                                                                                                                                                                                                                                                                                                                                                                                                                                                                                                                                                                                                                                                                                                                                                                                                                                                                                                                                                                                                                                                                                                    |
|-------------------------------|------------------------------------------------------------------------------------------------------------------------------------------------------------------------------------------------------------------------------------------------------------------------------------------------------------------------------------------------------------------------------------------------------------------------------------------------------------------------------------------------------------------------------------------------------------------------------------------------------------------------------------------------------------------------------------------------------------------------------------------------------------------------------------------------------------------------------------------------------------------------------------------------------------------------------------------------------------------------------------------------------------------------------------------------------------------------------------------------------------------------------------------------------------------------------------------------------------------------------------------------------------------------------------------------------------------------------------------------------------------------------------------------------------------------------------------------------------------------------------------------------------------------------------------------------------------------------------------------------------------------------------------------------------------------------------------------------------------------------------------------------------------------------------------------------------------------------------------------------------------------------------|
| Journal:                      | <i>BMJ Open</i>                                                                                                                                                                                                                                                                                                                                                                                                                                                                                                                                                                                                                                                                                                                                                                                                                                                                                                                                                                                                                                                                                                                                                                                                                                                                                                                                                                                                                                                                                                                                                                                                                                                                                                                                                                                                                                                                    |
| Manuscript ID                 | bmjopen-2022-066952.R2                                                                                                                                                                                                                                                                                                                                                                                                                                                                                                                                                                                                                                                                                                                                                                                                                                                                                                                                                                                                                                                                                                                                                                                                                                                                                                                                                                                                                                                                                                                                                                                                                                                                                                                                                                                                                                                             |
| Article Type:                 | Cohort profile                                                                                                                                                                                                                                                                                                                                                                                                                                                                                                                                                                                                                                                                                                                                                                                                                                                                                                                                                                                                                                                                                                                                                                                                                                                                                                                                                                                                                                                                                                                                                                                                                                                                                                                                                                                                                                                                     |
| Date Submitted by the Author: | 03-Feb-2023                                                                                                                                                                                                                                                                                                                                                                                                                                                                                                                                                                                                                                                                                                                                                                                                                                                                                                                                                                                                                                                                                                                                                                                                                                                                                                                                                                                                                                                                                                                                                                                                                                                                                                                                                                                                                                                                        |
| Complete List of Authors:     | <p>Castelijns, Maria; University Medical Centre Utrecht, Department of Vascular Medicine</p> <p>Helmink, Marga; University Medical Centre Utrecht, Department of Vascular Medicine</p> <p>Hageman, Steven; University Medical Centre Utrecht, Department of Vascular Medicine</p> <p>Asselbergs, Folkert; University Medical Centre Utrecht, Department of Cardiology</p> <p>de Borst, Gert-Jan; University Medical Centre Utrecht, Department of Vascular Surgery</p> <p>Bots, Michiel; University Medical Centre Utrecht, Julius Centre for Health Sciences and Primary Care</p> <p>cramer, maarten jan; University Medical Centre Utrecht, Department of Cardiology</p> <p>Dorresteijn, Jannick; University Medical Centre Utrecht, Department of Vascular Medicine</p> <p>Emmelot-Vonk, Marielle; University Medical Centre Utrecht, Department of Geriatrics</p> <p>Geerlings, Mirjam I; University Medical Centre Utrecht, Julius Center for Health Sciences and Primary Care</p> <p>de Jong, P. A.; University Medical Centre Utrecht, Department of Radiology</p> <p>van der Kaaij, Niels; University Medical Centre Utrecht, Department of Cardiothoracic Surgery</p> <p>Kappelle, Jaap; University Medical Centre Utrecht, Department of Neurology</p> <p>Lely, Titia; Universitair Medisch Centrum Utrecht, Department of Gynaecology and Obstetrics</p> <p>van der Meer, Manon; University Medical Centre Utrecht, Department of Cardiology</p> <p>Mol, Barend; University Medical Centre Utrecht, Department of Vascular Surgery</p> <p>Nathoe, Hendrik; University Medical Centre Utrecht, Department of Cardiology</p> <p>Onland-Moret, N. Charlotte; University Medical Centre Utrecht, Julius Centre for Health Sciences and Primary Care</p> <p>van Petersen, Rutger ; University Medical Centre Utrecht, Julius Centre for Health Sciences and Primary Care</p> |

|                                    |                                                                                                                                                                                                                                                                                                                                                                                                                                                                                                                                                                                                    |
|------------------------------------|----------------------------------------------------------------------------------------------------------------------------------------------------------------------------------------------------------------------------------------------------------------------------------------------------------------------------------------------------------------------------------------------------------------------------------------------------------------------------------------------------------------------------------------------------------------------------------------------------|
|                                    | Ruigrok, Ynte; University Medical Centre Utrecht, Department of Neurology<br>van Smeden, Maarten; University Medical Centre Utrecht<br>Teraa, Martin; University Medical Centre Utrecht, Department of Vascular Surgery<br>Vandersteen, Angela; University Medical Centre Utrecht, Department of Vascular Medicine<br>Verhaar, Marianne; University Medical Centre Utrecht, Department of Nephrology and Hypertension<br>Westerink, Jan; University Medical Centre Utrecht, Department of Vascular Medicine<br>Visseren, Frank; University Medical Centre Utrecht, Department of Vascular Medicine |
| <b>Primary Subject Heading</b> :   | Cardiovascular medicine                                                                                                                                                                                                                                                                                                                                                                                                                                                                                                                                                                            |
| <b>Secondary Subject Heading</b> : | Cardiovascular medicine, Diabetes and endocrinology, Epidemiology                                                                                                                                                                                                                                                                                                                                                                                                                                                                                                                                  |
| <b>Keywords</b> :                  | Vascular medicine < INTERNAL MEDICINE, EPIDEMIOLOGY, PREVENTIVE MEDICINE, General diabetes < DIABETES & ENDOCRINOLOGY                                                                                                                                                                                                                                                                                                                                                                                                                                                                              |
|                                    |                                                                                                                                                                                                                                                                                                                                                                                                                                                                                                                                                                                                    |

SCHOLARONE™  
Manuscripts





I, the Submitting Author has the right to grant and does grant on behalf of all authors of the Work (as defined in the below author licence), an exclusive licence and/or a non-exclusive licence for contributions from authors who are: i) UK Crown employees; ii) where BMJ has agreed a CC-BY licence shall apply, and/or iii) in accordance with the terms applicable for US Federal Government officers or employees acting as part of their official duties; on a worldwide, perpetual, irrevocable, royalty-free basis to BMJ Publishing Group Ltd ("BMJ") its licensees and where the relevant Journal is co-owned by BMJ to the co-owners of the Journal, to publish the Work in this journal and any other BMJ products and to exploit all rights, as set out in our [licence](#).

The Submitting Author accepts and understands that any supply made under these terms is made by BMJ to the Submitting Author unless you are acting as an employee on behalf of your employer or a postgraduate student of an affiliated institution which is paying any applicable article publishing charge ("APC") for Open Access articles. Where the Submitting Author wishes to make the Work available on an Open Access basis (and intends to pay the relevant APC), the terms of reuse of such Open Access shall be governed by a Creative Commons licence – details of these licences and which [Creative Commons](#) licence will apply to this Work are set out in our licence referred to above.

Other than as permitted in any relevant BMJ Author's Self Archiving Policies, I confirm this Work has not been accepted for publication elsewhere, is not being considered for publication elsewhere and does not duplicate material already published. I confirm all authors consent to publication of this Work and authorise the granting of this licence.

1  
2  
3 1 **Cohort profile: the Utrecht Cardiovascular Cohort – Second Manifestations of Arterial Disease**  
4  
5 2 **(UCC-SMART) study – an ongoing prospective cohort study of patients at high cardiovascular**  
6  
7 3 **risk in the Netherlands**  
8  
9 4

10  
11 5 Maria C. Castelijns<sup>\*a</sup>, Marga A.G. Helmink<sup>\*a</sup>, Steven H.J. Hageman<sup>a</sup>, Folkert W. Asselbergs<sup>b</sup>, Gert J.  
12  
13 6 de Borst<sup>c</sup>, Michiel L. Bots<sup>d</sup>, Maarten J. Cramer<sup>b</sup>, Jannick A.N. Dorresteijn<sup>a</sup>, Marielle H. Emmelot-  
14  
15 7 Vonke<sup>e</sup>, Mirjam I. Geerlings<sup>d</sup>, Pim A. de Jong<sup>f</sup>, Niels van der Kaaij<sup>g</sup>, L. Jaap Kappelle<sup>h</sup>, A. Titia Lely<sup>i</sup>,  
16  
17 8 Manon G. van der Meer<sup>b</sup>, Barend M. Mol<sup>c</sup>, Hendrik M. Nathoe<sup>b</sup>, N. Charlotte Onland-Moret<sup>d</sup>, Rutger  
18  
19 9 B. van Petersen<sup>d</sup>, Ynte M. Ruigrok<sup>h</sup>, Maarten van Smeden<sup>d</sup>, Martin Teraa<sup>c</sup>, Angela Vandersteen<sup>a</sup>,  
20  
21 10 Marianne C. Verhaar<sup>l</sup>, Jan Westerink<sup>a</sup>, Frank L.J. Visseren<sup>a</sup>  
22  
23  
24 11

25  
26 12 \* Contributed equally  
27

28 13 <sup>a</sup> Department of Vascular Medicine, University Medical Center Utrecht, Heidelberglaan 100, 3584 CX  
29  
30 14 Utrecht, the Netherlands  
31

32 15 <sup>b</sup> Department of Cardiology, University Medical Center Utrecht, Utrecht, the Netherlands  
33

34 16 <sup>c</sup> Department of Vascular Surgery, University Medical Center Utrecht, the Netherlands  
35

36 17 <sup>d</sup> Julius Center for Health Sciences and Primary Care, University Medical Center Utrecht and Utrecht  
37  
38 18 University, Utrecht, the Netherlands  
39

40 19 <sup>e</sup> Department of Geriatrics, University Medical Center Utrecht, the Netherlands  
41

42 20 <sup>f</sup> Department of Radiology, University Medical Center Utrecht, the Netherlands  
43

44 21 <sup>g</sup> Department of Cardiothoracic Surgery, University Medical Center Utrecht, the Netherlands  
45

46 22 <sup>h</sup> Department of Neurology, University Medical Center Utrecht, the Netherlands  
47

48 23 <sup>i</sup> Department of Gynaecology and Obstetrics, University Medical Center Utrecht, the Netherlands  
49

50 24 <sup>j</sup> Department of Nephrology and Hypertension, University Medical Center Utrecht, the Netherlands  
51

52  
53  
54 25

55  
56 26 Corresponding author: F.L.J. Visseren, e-mail address: [F.L.J.Visseren@umcutrecht.nl](mailto:F.L.J.Visseren@umcutrecht.nl)  
57  
58  
59  
60

1  
2  
3 28 Keywords: cardiovascular disease, risk factor, diabetes mellitus, cohort study, follow up study  
4  
5 29  
6  
7 30 Word count: 5,569  
8  
9  
10  
11  
12  
13  
14  
15  
16  
17  
18  
19  
20  
21  
22  
23  
24  
25  
26  
27  
28  
29  
30  
31  
32  
33  
34  
35  
36  
37  
38  
39  
40  
41  
42  
43  
44  
45  
46  
47  
48  
49  
50  
51  
52  
53  
54  
55  
56  
57  
58  
59  
60

For peer review only

1  
2  
3 31 **Abstract**  
4

5 32 **Purpose:** The Utrecht Cardiovascular Cohort – Second Manifestations of Arterial Disease (UCC-  
6  
7 33 SMART) study is an ongoing prospective single-center cohort study with the aim to assess important  
8  
9 34 determinants and the prognosis of cardiovascular disease progression. This article provides an update of  
10  
11 35 the rationale, design, included patients, measurements and findings from the start in 1996 to date.  
12

13 36 **Participants:** The UCC-SMART study includes patients aged 18-90 years referred to the University  
14  
15 37 Medical Center (UMC) Utrecht, the Netherlands, for management of cardiovascular disease (CVD) or  
16  
17 38 severe cardiovascular risk factors. Since September 1996, a total of 14,830 patients has been included.  
18  
19 39 Upon inclusion, patients undergo a standardized screening program, including questionnaires, vital  
20  
21 40 signs, laboratory measurements, an electrocardiogram, vascular ultrasound of carotid arteries and aorta,  
22  
23 41 ankle-brachial index and ultrasound measurements of adipose tissue, kidney size and intima media  
24  
25 42 thickness. Outcomes of interest are collected through annual questionnaires and adjudicated by an  
26  
27 43 endpoint committee.  
28  
29

30 44 **Findings to date:** By May 2022, the included patients contributed to a total follow-up time of over  
31  
32 45 134,000 person-years. During follow-up, 2,259 patients suffered a vascular endpoint (including non-  
33  
34 46 fatal myocardial infarction, non-fatal stroke and vascular death) and 2,794 all-cause deaths, 943 incident  
35  
36 47 cases of diabetes and 2,139 incident cases of cancer were observed up until January 2020. The UCC-  
37  
38 48 SMART cohort contributed to over 350 articles published in peer-reviewed journals, including  
39  
40 49 prediction models recommended by the 2021 ESC CVD prevention guidelines.  
41  
42

43 50 **Future plans:** The UCC-SMART study guarantees an infrastructure for research in patients at high  
44  
45 51 cardiovascular risk. The cohort will continue to include about 600 patients yearly and follow-up will be  
46  
47 52 ongoing to ensure an up-to-date cohort in accordance with current health care and scientific knowledge.  
48  
49 53 In the near future, UCC-SMART will be enriched by echocardiography, and a food frequency  
50  
51 54 questionnaire at baseline enabling the assessment of associations between nutrition and CVD and  
52  
53 55 diabetes.  
54  
55  
56  
57  
58  
59  
60

1  
2  
3 56 **Strengths and limitations**  
4

- 5 57 • The Utrecht Cardiovascular Cohort – Second Manifestations of Arterial disease (UCC-  
6 58 SMART) study is an ongoing cohort of almost 15,000 patients with various manifestations of  
7  
8 59 CVD and cardiovascular risk factors  
9  
10  
11 60 • The UCC-SMART study covers a long follow-up duration and prospectively captures extensive  
12  
13 61 outcome data in a high cardiovascular risk population  
14  
15 62 • The use of a standardized screening program that includes baseline characteristics, physical  
16 63 examination, laboratory testing and non-invasive imaging provides an extended resource of data  
17  
18 64 for research on cardiovascular disease epidemiology  
19  
20 65 • Limitations of the cohort include measurement of the determinants only at baseline for the  
21  
22 66 majority of patients, and the sparse information on socioeconomic status  
23  
24  
25  
26  
27  
28  
29  
30  
31  
32  
33  
34  
35  
36  
37  
38  
39  
40  
41  
42  
43  
44  
45  
46  
47  
48  
49  
50  
51  
52  
53  
54  
55  
56  
57  
58  
59  
60

## 67 **Introduction**

68 Cardiovascular disease (CVD) is the leading cause of morbidity and mortality worldwide, causing  
69 around one-third of all deaths globally in 2019.[1] Atherosclerosis, the dominant cause of CVD, is  
70 fuelled by multiple mutually reinforcing and co-existing risk factors. Because of the progressive nature  
71 of atherosclerosis, patients with established CVD are at high risk of recurrent CVD and mortality.[2,3]  
72 Treatment of cardiovascular risk factors is known to markedly reduce the risk of new cardiovascular  
73 events.[4,5] Slowing down the process of atherosclerosis by timely identification and treatment of  
74 cardiovascular risk factors is therefore of the utmost importance.

75 In 1996, the Second Manifestations of Arterial Disease (SMART) cohort study was set up enrolling  
76 patients newly referred to the University Medical Center (UMC) Utrecht with clinically manifest CVD  
77 or marked risk factors for atherosclerosis. The study was designed with the aim of determining the  
78 prevalence of concomitant atherosclerotic disease and risk factors, as well as studying the incidence of  
79 future cardiovascular events and its predictors. Furthermore, the SMART study contributes to the  
80 complete and protocolized multidisciplinary care of these high risk patients by integrating a standardized  
81 set of measurements into usual patient care. The rationale and design of the study were previously  
82 published in 1999[6], with the study containing around 600 patients at that time. In 2018, the name of  
83 SMART changed to Utrecht Cardiovascular Cohort (UCC)-SMART. By now, 26 years after enrolment  
84 of the first patient, many baseline measurements have been added, substudies have been initiated, the  
85 study has been linked to national registries and the data have been used in several large (inter)national  
86 collaborations. At the same time, demographic and guideline changes have led to differences in the  
87 baseline characteristics and absolute risk of the patients included in the cohort. The aim of the current  
88 article is to provide an update on the rationale, design, included patients, baseline measurements and  
89 follow-up to date.

## 91 **Cohort description**

92 The UCC-SMART-study is a single-centre prospective cohort study, ongoing in both inclusion and  
93 follow-up, in which patient care and scientific research concerning cardiovascular risk factors and  
94 disease are integrated. This is depicted in Figure 1 and discussed in more detail in the sections below.

95

96 *Study population*

97 Starting from September 1996, patients aged 18 to 80 years referred to the UMC Utrecht, the  
98 Netherlands, for management of CVD or severe risk factors for CVD, have been recruited. Patients with  
99 cerebrovascular disease (CeVD), coronary artery disease (CAD), abdominal aortic aneurysm (AAA),  
100 peripheral artery disease (PAD), renal artery stenosis or one or more of the following cardiovascular  
101 risk factors, if rated as severe, are eligible to be included: hypertension, hyperlipidaemia, diabetes  
102 mellitus, renal insufficiency and a positive family medical history. Patients with a chronic human  
103 immunodeficiency virus infection as a cardiovascular risk-increasing condition or with hypertensive  
104 pregnancy disorders have been included since 2007 and 2012, respectively. Definitions of the inclusion  
105 criteria are listed in Supplementary Table 1. If patients have a history of multiple vascular events or risk  
106 factors, the referral reason (usually the most recent event) is listed as the qualifying inclusion diagnosis  
107 and any comorbidities are also registered. Pregnant women, patients with a short life expectancy and  
108 those insufficiently fluent in Dutch are not eligible.

109 Qualifying patients with CVD and/or risk factors listed above are recruited upon their first visit  
110 to the outpatient clinics and hospital wards of the departments of vascular medicine, internal medicine,  
111 nephrology, neurology, cardiology, cardiac surgery, obstetrics and vascular surgery. From 2021  
112 onwards, the outpatient clinic of the department of geriatric medicine has been added to this list and the  
113 maximum age to be eligible for inclusion has been raised from 80 to 90 years old. In case of a recent  
114 cardiovascular event or intervention as the reason for inclusion, patients are invited after discharge from  
115 the hospital. In such cases, baseline measurements are generally performed more than 30 days after the  
116 acute event. All qualifying patients receive written and oral information about study goals and methods  
117 and are included only after written informed consent to use their data for study goals, the reporting of  
118 incidental findings to their treating physician, indefinite period storage of blood samples for future  
119 research and follow-up through annual questionnaires. In addition, participants can opt in or out to the  
120 following items: retrieval of data from regional and national registries, use of their data in research  
121 collaborations with for-profit organizations, use of coded data and laboratory samples for research  
122 outside the European Union and possible future requests to participate in follow-up studies of UCC-

1  
2  
3 123 SMART. When patients do not consent to any of these additional items, they can still partake in the  
4  
5 124 UCC-SMART study.

6  
7 125

8  
9 126 *Baseline data collection*

10  
11 127 The screening program consists of questionnaires, physical examination, an electrocardiogram (ECG),  
12  
13 128 blood, urine and radiology testing. Except for the questionnaires, to be filled out before the hospital visit,  
14  
15 129 the diagnostic components of the program take place during a one-day visit. An overview of all the  
16  
17 130 variables available in UCC-SMART is provided in Supplementary Table 2. Some measurements have  
18  
19 131 only been collected for or starting from a certain time period (Figure 2 and Supplementary Table 3).

20  
21  
22 132

23  
24 133 *Health questionnaires*

25  
26 134 The questionnaires collect data on medical history including established CVD (CeVD, CAD, AAA and  
27  
28 135 PAD as described in Supplementary Table 4), cardiovascular risk factors, symptoms of CVD (based on  
29  
30 136 the Rose Angina Questionnaire[7]), medication use, family history and lifestyle. For women, a question  
31  
32 137 on the age at menopause (if applicable) is included as well. From 2002 onward, information on obstetric  
33  
34 138 history has been collected including the number of full-term pregnancies, miscarriages (<14 weeks of  
35  
36 139 gestation), preterm deliveries (14 – 32 weeks of gestation), birth weight and pregnancy complications.  
37  
38 140 As of August 2022, a 160-item food frequency questionnaire (FFQ), validated in the Dutch population,  
39  
40 141 has been added to the questionnaires.[8] Recently, these questionnaires have also been sent to people  
41  
42 142 who were included in the UCC-SMART study before August 2022. The results of the questionnaires  
43  
44 143 will follow in 2023.

45  
46  
47 144

48  
49 145 *Physical examination*

50  
51 146 Anthropometric measurements are taken by trained (research) nurses and include body height in  
52  
53 147 centimetres, weight in kilograms and waist and hip circumference in centimetres with patients wearing  
54  
55 148 light clothing and no shoes. Weight and length are used to calculate body mass index in kg/m<sup>2</sup>. Waist  
56  
57 149 circumference is measured horizontally at the midpoint between the iliac crest and lower costal margin  
58  
59 150 and hip circumference is taken at the maximum horizontal circumference around the gluteal muscles.



1  
2  
3 151 The mean of two measurements is calculated. If the two measurements differ by >2 cm, a third is taken  
4  
5 152 and the mean of the closest two is calculated.  
6

7 153 From 1996 up until 1999, office blood pressure was measured using a semiautomatic  
8  
9 154 oscillometric device (Omega 1400; Invivo Research Laboratories Inc., Broken Arrow, OK, USA) every  
10  
11 155 4 minutes for a total of 25 minutes at the right brachial artery in supine position and the mean systolic  
12  
13 156 (SBP) and diastolic blood pressure (DBP) were calculated. From April 1999 until 2015, using a non-  
14  
15 157 random sphygmomanometer (Iso-Stabil 5; Speidel & Keller, Jungingen, Germany), 3 simultaneous  
16  
17 158 measurements with an interval of 30 seconds were taken at both upper arms in upright position and the  
18  
19 159 SBP and DBP of the last two measurements were calculated from the arm yielding the highest values.  
20  
21 160 From 2015 onward, office blood pressure has been measured using an automatic oscillometric device  
22  
23 161 (Microlife WatchBP Office AFIB; Microlife Corp, Widnau, Switzerland). The measurement is  
24  
25 162 performed unattended, in triplicate with an interval of 30 seconds, at both upper arms in supine position  
26  
27 163 after the patient has rested for 30 seconds. The measurements on the arm with the highest blood pressure  
28  
29 164 are recorded and the mean SBP and DBP are calculated.  
30  
31

32 165 In order to calculate the ankle-brachial index (ABI), blood pressure measurements are taken at  
33  
34 166 rest at both upper arms every two minutes whilst the blood pressure is measured at both lower legs. For  
35  
36 167 this, a Falcon Quad 8 MHz Doppler probe (Viasonix, Ra'anana, Israel) is used at a 60° angle at the  
37  
38 168 dorsal pedal and posterior tibial arteries. The ABI is defined for each leg as the highest SBP at the ankle  
39  
40 169 divided by the highest brachial SBP.  
41  
42

43 170

#### 45 171 *Laboratory testing*

46  
47 172 On the day of screening, a venous blood sample is drawn after at least eight hours of fasting to measure  
48  
49 173 glucose, total cholesterol, high-density lipoprotein cholesterol (HDL-C), triglycerides, creatinine, and  
50  
51 174 haemoglobin. Laboratory measurements of fasting insulin, C-reactive protein (CRP) and thyroid  
52  
53 175 stimulating hormone (TSH) were added in 2003 and glycated haemoglobin (HbA1c) and apolipoprotein  
54  
55 176 B (apoB) were added in 2006. Lastly, measurement of lipoprotein(a) was added in June 2020.  
56

57  
58 177 Glucose is measured using an enzymatic colorimetric assay (Beckman Coulter, Brea, CA,  
59  
60 178 USA). Total cholesterol and triglycerides are measured using a commercial enzymatic dry chemistry kit

1  
2  
3 179 (Johnson & Johnson, New Brunswick, NJ, USA) and HDL-C with a commercial enzymatic kit  
4  
5 180 (Boehringer, Mannheim, Germany). Low-density lipoprotein cholesterol (LDL-C) is calculated using  
6  
7 181 the Friedewald formula up to a plasma triglyceride level of 9 mmol/L.[9] Estimated glomerular filtration  
8  
9 182 rate (eGFR) is calculated using the Chronic Kidney Disease Epidemiology Collaboration (CKD-EPI)  
10  
11 183 formula.[10] Spectrophotometry (Abbott Diagnostics, Santa Clara, CA, USA) is used to determine  
12  
13 184 haemoglobin levels. CRP in plasma was initially determined using immunonephelometry  
14  
15 185 (Nephelometer Analyzer BN II, Siemens, The Hague, The Netherlands) and from 2013 in heparin  
16  
17 186 plasma on an AU5811 routine chemistry analyser using turbidimetry (Beckman Coulter, Brea, CA,  
18  
19 187 USA). These types of measurements are strongly correlated ( $r = 0.99$ ) and can therefore be pooled for  
20  
21 188 analyses.[11] Before November 2006, TSH was quantified using a third-generation assay on a Centaur  
22  
23 189 analyser (Bayer, Germany). Since December 2006, TSH has been measured by a third-generation assay  
24  
25 190 on a DXi analyser (Beckman Coulter, Woerden, The Netherlands). Correlation between the two  
26  
27 191 analysers is  $r = 0.9991$  ( $n = 69$ ), with an intercept of  $-0.05$  mU/L (95%CI  $-0.22-0.12$ ) and a slope of  
28  
29 192  $1.04$  (95%CI  $1.029-1.052$ ) (range  $0-95$  mU/L). ApoB and lipoprotein(a) are measured using  
30  
31 193 nephelometry (Atellica Neph 630, Siemens, The Hague, The Netherlands). A morning-void urine  
32  
33 194 sample is collected to determine urine albumin, creatinine, sodium and potassium levels. Urine albumin  
34  
35 195 is measured using immunoturbidimetric assays. Ion selective electrode (Beckman Coulter, Brea, CA,  
36  
37 196 USA) is used to determine urine sodium and potassium levels. DNA can be isolated from 10 mL of  
38  
39 197 EDTA-augmented blood stored at  $-80^{\circ}$  for genotyping.  
40  
41  
42  
43  
44

198

### 199 *Radiology testing*

47 200 Non-invasive vascular imaging testing is performed by specially trained ultrasound technicians. Duplex  
48  
49 201 examination of the carotid arteries is conducted to assess possible stenosis using peak systolic velocity  
50  
51 202 measurements at the brachiocephalic trunk, carotid arteries (mid- and distal common, external and  
52  
53 203 proximal and distal internal) and vertebral arteries (proximal and distal). Measurements are performed  
54  
55 204 using an EPIQ-7 ultrasound machine (Philips Medical Systems, Eindhoven, The Netherlands). In case  
56  
57 205 of abnormal signals and/or retrograde flow in the vertebral arteries, the proximal subclavian arteries are  
58  
59 206 evaluated in search of severe stenosis or occlusion. For research purposes, intima-media-thickness

1  
2  
3 207 (IMT) of the carotid arteries is measured using a linear array transducer. With the patient lying down  
4  
5 208 and the head turned 45° away from the side investigated, the ultrasound frame yielding an optimal  
6  
7 209 longitudinal picture of the common carotid arterial wall is frozen at the time of the R-peak of ECG  
8  
9 210 recording. Over a length of 1 cm starting from the carotid bulb towards proximal direction, the arterial  
10  
11 211 wall thickness is measured from the lumen-intima interface to the media-adventitia interface. The mean  
12  
13 212 of measurements in anterolateral, lateral and posterolateral direction is calculated.

14  
15 213 Abdominal ultrasound examination is performed using the same ultrasound machine to obtain  
16  
17 214 the maximal anterior-posterior diameter of the juxtarenal and infrarenal abdominal aorta and kidney  
18  
19 215 length and volume. As of January 2000, visceral and subcutaneous adipose tissue measurements were  
20  
21 216 added. The amount of subcutaneous fat is estimated by the distance from the linea alba to the skin.  
22  
23 217 Visceral adipose tissue thickness is measured as the distance between the lumbar spine and the  
24  
25 218 peritoneum. Measurements are taken at the end of a quiet expiration on a frozen ultrasound frame at  
26  
27 219 three points on the imaginary transversal line halfway between the iliac crest and lower costal margin:  
28  
29 220 at the midsternal line and 10 cm to the left and right on the transversal line. Each measurement is taken  
30  
31 221 three times and then the mean of the measurements is recorded as the actual thickness. Ultrasonography  
32  
33 222 has been proven a suitable technique to measure intra-abdominal adipose tissue with good  
34  
35 223 reproducibility.[12,13] Moreover, from September 1998 on, a protocolized 12-lead resting ECG has  
36  
37 224 been recorded.

38  
39  
40 225 In the near future, echocardiography will be added to the UCC-SMART program to facilitate  
41  
42 226 research on the presence of heart failure at baseline. Echocardiography will be performed using a Philips  
43  
44 227 Affiniti 70 ultrasound machine (Philips Medical Systems, Andover, MA, USA) by using a specific  
45  
46 228 protocol involving 2-dimensional (2D), M-mode, Doppler, tissue Doppler and 2D speckle tracking  
47  
48 229 (STE) imaging in accordance with the European Association of Cardiovascular Imaging 2016  
49  
50 230 recommendations for chamber quantification.[14] In particular, left ventricular dimensions will be  
51  
52 231 measured in order to calculate the left ventricular mass index.[15] Left ventricular ejection fraction will  
53  
54 232 be assessed quantitatively, preferably with automated three-dimensional imaging or alternatively with  
55  
56 233 the Simpsons biplane method. Left atrial maximal volume and right ventricular dimensions and function  
57  
58 234 will be measured as recommended.[14] Multiple parameters of left ventricular diastolic function will be

1  
2  
3 235 assessed, including pulsed-wave Doppler of the mitral inflow and tissue Doppler imaging of the mitral  
4  
5 236 annulus motion. Left ventricular diastolic function will be evaluated according to current diagnostic  
6  
7 237 algorithms.[16] A minimal of three sequential complexes will be recorded. Standard image analysis will  
8  
9 238 then be performed off-line in accordance with clinical guidelines using Philips IntelliSpace  
10  
11 239 Cardiovascular software and will include 2D STE analysis of the left ventricle and left atrium.  
12

13  
14 240

#### 15 241 *Treatment recommendation*

16  
17 242 After completion of the screening, the findings are assessed by a multidisciplinary team of two medical  
18  
19 243 specialists (internist, cardiologist, neurologist or vascular surgeon). A treatment recommendation is  
20  
21 244 formulated based on current applicable guidelines, according to which patients are already treated by  
22  
23 245 their general practitioner or medical specialist. The screening results and treatment recommendation are  
24  
25 246 reported in a medical letter which is sent to the treating specialist and general practitioner. Patients  
26  
27 247 receive a summary of relevant findings and recommendations.  
28  
29

30 248 Incidental medical findings during the screening are reported to one of the study physicians and  
31  
32 249 if needed, discussed with specialists from the multidisciplinary team. The findings are added to the  
33  
34 250 medical record and sent to the treating specialist or general practitioner for further action.  
35  
36

37 251

#### 38 252 *Follow-up*

39  
40 253 Patients receive annual questionnaires with questions on hospital admissions and outpatient clinic visits,  
41  
42 254 regardless of whether they are still under the care of the UMC Utrecht. In case patients no longer wish  
43  
44 255 to complete the questionnaires, they are asked if they consent to collection of information from their  
45  
46 256 general practitioner. When the replies indicate possible outcome events, additional information is  
47  
48 257 collected through hospital discharge letters and relevant laboratory and radiology examinations. Clinical  
49  
50 258 events of interest include stroke, myocardial infarction, heart failure, AAA rupture, renal insufficiency,  
51  
52 259 vascular interventions, bleeding, diabetes and vascular and non-vascular mortality as defined in  
53  
54 260 Supplementary Table 5. Incident type 2 diabetes has been assessed since July 2006. To assess incident  
55  
56 261 diabetes between 1996 and 2006, a questionnaire was sent to all patients without diabetes at baseline  
57  
58 262 who were included before July 2006. Incident heart failure has been assessed since October 2011. Three  
59  
60

1  
2  
3 263 members from the endpoint committee independently judge reported events. The endpoint committee  
4  
5 264 consists of medical specialists from the recruiting departments. If all three physicians judge differently,  
6  
7 265 the event is discussed with two other physicians from the committee to reach consensus. Secondary  
8  
9 266 outcomes are adjudicated by trained research nurses. As of 2021, diagnoses of dementia and mild  
10  
11 267 cognitive impairment have been added to the annual questionnaire as self-reported diagnoses.  
12  
13  
14 268

#### 15 269 *Data quality and management*

16  
17  
18 270 Data collected in the UCC-SMART program is stored in the electronic medical record of the UMC  
19  
20 271 Utrecht. Blood samples (serum, citrate plasma, EDTA plasma and erythrocytes concentrate aliquots) are  
21  
22 272 stored at -80°C according to the Biobanks Regulations to be found at the UMC Utrecht website  
23  
24 273 (<https://www.umcutrecht.nl/nl/centrale-biobank>). The central biobank of the UMC Utrecht is ISO9001  
25  
26 274 certified (certificate number 2175592). Release of material for future research is reviewed by the UMC  
27  
28 275 Utrecht Biobanks Review Committee.

29  
30 276 Recorded data is downloaded from the electronic medical record and pseudonymized by the  
31  
32 277 data manager who holds the encryption key, only to be accessed after permission of the principal  
33  
34 278 investigator. The UCC-SMART study group periodically performs quality checks for missing values  
35  
36 279 and inconsistencies compared to source documents, or values outside of the range deemed likely.  
37  
38

39 280

#### 40 41 281 *Patient and public involvement*

42  
43 282 Patients were not involved in the study design. Their experiences of burden and required time are  
44  
45 283 considered in the implementation of new components in the program. Relevant findings of the UCC-  
46  
47 284 SMART screening program and corresponding recommendations are sent to the patients. In addition,  
48  
49 285 patients regularly receive a newsletter containing up-to-date facts and figures of the UCC-SMART study  
50  
51 286 and substudies and findings of publications using UCC-SMART data. The UMC Utrecht policies are in  
52  
53 287 line with open science, for opening up the research agenda to societal stakeholders, open research data  
54  
55 288 and open access publications.  
56  
57

58 289

59  
60 290

1  
2  
3 291 *Linkage to other registries*  
4

5 292 Data in the UCC-SMART study can be enriched by collecting data from various registries and  
6  
7 293 organizations, for example to obtain additional information on outcomes and medication use. Some  
8  
9 294 examples of these linkages are described below.  
10

11 295

12  
13 296 *Netherlands Cancer Registry*  
14

15 297 CVD and cancer share many risk factors and pathophysiological mechanisms, including body fat  
16  
17 298 distribution, diet, physical inactivity, smoking, chronic inflammation burden, and oxidative stress.[17]  
18  
19 299 To evaluate the relation between several cardiovascular risk factors and the risk of cancer, the UCC-  
20  
21 300 SMART cohort has been linked to the *Netherlands Comprehensive Cancer Organisation (IKNL)*, a  
22  
23 301 nationwide registry receiving notifications of all new cancer diagnoses. By linking the cohort to the  
24  
25 302 national cancer registry repeatedly, with the most recent linkage taking place in 2022, information on  
26  
27 303 cancer incidence and details of cancer types and histopathology was obtained.  
28  
29

30 304

31  
32 305 *Central Agency for Statistics (CBS) Netherlands*  
33

34 306 The UCC-SMART cohort can be linked to the *Central Agency for Statistics (CBS)*, also known as  
35  
36 307 *Statistic Netherlands*, which contains data on ICD-10 coded diagnoses and hospital admissions since  
37  
38 308 1996. This allows for, amongst others, collection of endpoints that are not regularly collected in UCC-  
39  
40 309 SMART or have been collected from a later time point, such as heart failure diagnoses. The CBS collects  
41  
42 310 data from all hospitals in the Netherlands and from general practitioner practices affiliated with 'Nivel'  
43  
44 311 healthcare registration, which are a good reflection of the Dutch population.[18,19]  
45  
46

47 312

48  
49 313 *Utrecht Patient Oriented Database (UPOD)*  
50

51 314 The UCC-SMART cohort can be linked to UPOD[20], a database containing electronic patient data  
52  
53 315 from routine clinical care in the UMC Utrecht. This database has been collecting patient characteristics,  
54  
55 316 medication orders, laboratory test results, hospital discharge diagnoses and medical procedures since  
56  
57 317 2000, enabling the addition of baseline and follow-up information to the UCC-SMART study.  
58  
59

60 318

1  
2  
3 319 *Consortia*

4  
5 320 The data collected in UCC-SMART is added to several consortia such as a genetics consortium  
6  
7 321 (GENIUS-CHD[21] on genetics of subsequent coronary heart disease), the Netherlands consortium of  
8  
9 322 dementia cohorts and the Chronic Kidney Disease Prognosis Consortium[22].

10  
11 323

12  
13 324 *Dutch Foundation for Pharmaceutical Statistics*

14  
15 325 A future plan is to obtain information on medication use during follow-up by linking the UCC-  
16  
17 326 SMART cohort to the *Dutch Foundation for Pharmaceutical Statistics (Stichting Farmaceutische*  
18  
19 327 *Kengetallen* [SFK]). This foundation obtains data from over 97% of the community pharmacies in the  
20  
21 328 Netherlands.[23]

22  
23 329

24  
25 330 *Substudies*

26  
27 331 *SMART-2*

28  
29 332 Patients with a history of CVD or diabetes are invited to participate in the SMART-2 substudy. In this  
30  
31 333 study, the baseline measurements of UCC-SMART are repeated in order to investigate the course of  
32  
33 334 atherosclerosis and vascular risk factors over time, and to evaluate the effects of treatment. Until May  
34  
35 335 2022, 2,313 patients have participated in SMART-2 after a median of 9.9 years (IQR 9.2 – 10.8) since  
36  
37 336 their inclusion in UCC-SMART. As with UCC-SMART, the findings of SMART-2 with an  
38  
39 337 accompanying treatment recommendation are communicated to the patient, his or her treating medical  
40  
41 338 specialist and general practitioner.

42  
43 339

44  
45 340 *SMART-ORACLE*

46  
47 341 SMART-ORACLE aims to determine the additional value of contrast-enhanced computed tomography  
48  
49 342 (CT) of the coronary and carotid arteries on top of traditional cardiovascular risk factors in patients with  
50  
51 343 a history of CVD, diabetes or hypertension.[24] The study is still ongoing and has currently been  
52  
53 344 conducted in 1,252 patients.

54  
55 345

56  
57 346 *SMART-MR and SMART Medea*

1  
2  
3 347 SMART-MR and SMART Medea target the investigation of brain changes in patients with CVD using  
4  
5 348 1.5T magnetic resonance imaging (MRI) (and 7T MRI in a subset of patients).[25,26] This study was  
6  
7 349 conducted in 1,309 patients. Amongst others, measurements of the total cerebral blood flow have been  
8  
9 350 performed and characteristics of white matter lesions and microbleeds have been mapped.

351

#### 352 *Athero-Express*

353 In May 2022, the Athero-Express biobank and study cohort have been incorporated into the UCC-  
354 SMART study.[27] The objective of Athero-Express is to investigate the value of plaque characteristics  
355 in relation to long term cardiovascular events. This ongoing prospective study, initiated in April 2002,  
356 includes patients undergoing femoral or carotid endarterectomy. During surgery, the atherosclerotic  
357 plaque is harvested and immunohistochemically stained in order to assess fat, collagen, macrophages and  
358 smooth muscle cells.

359

#### 360 *Other substudies*

361 Several other substudies have been carried out within the UCC-SMART cohort, providing additional  
362 information and parameters for subsets of patients (Supplementary Table 6). As part of **SMART-**  
363 **Junior**, additional questionnaires have been sent to 4,270 patients in order to investigate the presence  
364 of cardiovascular risk factors and CVD in their offspring.[28] In **DISH**, diffuse idiopathic skeletal  
365 hyperostosis was scored on chest X-rays of 4,791 patients, performed in the context of health care, using  
366 the Resnick criteria.[29,30] **SMART-HEART** aimed to detect patient characteristics related to the  
367 development of left ventricle hypertrophy using 1.5T cardiac MRI in 536 patients with hypertension,  
368 but free of known coronary or valvular disease.[31] In order to determine whether intima and media  
369 calcification differ in their associated CVD risks and to elucidate which risk factors lead to the  
370 development of those types of calcification, CT-scans of the femoral head to the feet have been  
371 performed in 520 patients as part of **ARTEMIS**.[32] The aim of the **Small aneurysms trial** was to  
372 estimate the overall rupture rates of small AAAs and to investigate demographic characteristics and  
373 cardiovascular risk factors for association with AAA growth using ultrasound scanning of the aorta in  
374 230 patients with an initial AAA diameter of 30-55 mm.[33] In **Brown adipose tissue**, supraclavicular



1  
2  
3 375 and subcutaneous adipose tissue fat-signal-fractions were assessed in 50 patients with CVD using 1.5T  
4  
5 376 water-fat MRI.[34] **SPAIN** evaluated the feasibility of a web-based coaching program for vascular risk  
6  
7 377 factor treatment, described the patterns of use of this program and measured changes in risk factors in  
8  
9 378 50 patients with CVD.[35] **RULE** investigated the impact of the UCC-SMART study compared to usual  
10  
11 379 care on cardiovascular risk factors in 604 patients with CVD or type 2 diabetes.[36]

12  
13 380 A few clinical trials have been conducted within the UCC-SMART study. **TEMPUS** was a  
14  
15 381 randomized crossover trial in 78 patients that investigated the effects of a cardiovascular polypill on  
16  
17 382 LDL-C, ambulatory blood pressure and adherence as compared to the administration of the individual,  
18  
19 383 identically dosed components of the polypill.[37] **SMART-Inform** was a three-armed randomized  
20  
21 384 controlled trial (RCT) in 303 patients using a statin with CVD.[38] The aim was to determine whether  
22  
23 385 communicating personalized statin therapy-effects leads to lower decisional conflicts associated with  
24  
25 386 statin use compared with standardized (non-personalized) therapy-effects. **BEST** was an RCT  
26  
27 387 investigating whether a clearly written agreement on risk factor management between general  
28  
29 388 practitioners and hospitals improved the vascular risk profile of 197 patients compared with usual  
30  
31 389 care.[39] Another RCT was **VENUS**, which included 236 patients with  $\geq 2$  modifiable risk factors,  
32  
33 390 investigating whether risk factor management in the hospital improved with nurse practitioner care on  
34  
35 391 top of usual care compared with usual care alone.[40] Lastly, **IRIS** was an RCT that evaluated whether  
36  
37 392 an internet-based vascular risk factor management program promoting self-efficacy on top of usual care  
38  
39 393 is more effective than usual care alone in reducing vascular risk factors in 330 patients with CVD.[41]  
40  
41 394 A timeline showing the different substudies is presented in Supplementary Figure 1.  
42  
43  
44  
45  
46

#### 47 396 *Characteristics of the study population*

48  
49 397 By May 2022, a total of 14,830 patients has been included (Figure 3). Of those, 3,294 patients died and  
50  
51 398 89% (n = 10,219) of the surviving patients are still being followed up. Reasons for follow-up to end in  
52  
53 399 surviving patients include withdrawal of participation in further follow-up (80%) or being unreachable  
54  
55 400 for further questionnaires (20%). The median follow-up time of these patients without complete follow-  
56  
57 401 up data is 7.4 years (IQR 3.9 - 11.4). Figure 4 shows the numbers and distribution of the reasons for  
58  
59 402 inclusion. The most common inclusion diagnosis was CAD (n = 4,729), followed by hypertension (n =

1  
2  
3 403 2,344) and CeVD (n = 2,276). PAD was the enrolment diagnosis in 1,173 patients and AAA in 369  
4  
5 404 patients. Hyperlipidaemia was the inclusion diagnosis in 1,433 patients and diabetes mellitus in 730  
6  
7 405 patients.

9 406 Patient characteristics, medication use and measurements at baseline are listed in Table 1. This table  
10  
11 407 is stratified for medical history at baseline, with the items of medical history either being the inclusion  
12  
13 408 diagnosis or a comorbidity. This means that patients may fall within more than one category as listed in  
14  
15 409 Table 1. The majority of patients included in the cohort is male (65%), especially among the subgroup  
16  
17 410 of patients with established CVD (73% male). The mean age of the total population is  $56.8 \pm 12.5$  years.  
18  
19 411 In total, 2,608 individuals (18%) had diabetes and 9,633 individuals (65%) had established CVD at  
20  
21 412 baseline. Of these CVD patients, 1,399 (15%) had polyvascular disease, i.e. multiple vascular beds  
22  
23 413 (cerebral, coronary, abdominal aorta or lower extremity) being affected. The proportion of missing  
24  
25 414 variables is less than 3% for all variables, except for adipose tissue measurements on ultrasound (3.6%),  
26  
27 415 albuminuria (4.7%) and CRP level (9.0%). Vascular screening indicated significant carotid artery  
28  
29 416 stenosis (>50% stenosis) in 526 (4%) patients, AAA in 188 (1%) patients and low ABI ( $\leq 0.9$ ) in 829  
30  
31 417 (6%) patients who were not previously diagnosed with CeVD, AAA or PAD, respectively. Of the 3,095  
32  
33 418 patients with established CVD included between 2012 and 2022 (to account for applicable guidelines),  
34  
35 419 2,075 (67%) had a SBP <140 mmHg, 753 (25%) had an LDL-C  $\leq 1.8$  mmol/L and 2,737 patients (88%)  
36  
37 420 were using antithrombotic agents at baseline. Baseline characteristics of patients with complete follow-  
38  
39 421 up data available were comparable to the characteristics of patients who withdrew from or were  
40  
41 422 unreachable for further follow-up (Supplementary Table 7).  
42  
43  
44  
45  
46  
47  
48  
49  
50  
51  
52  
53  
54  
55  
56  
57  
58  
59  
60

423 *Table 1. Baseline characteristics stratified for medical history*

|                                    | History of CVD          |                         |                           |                           | Cardiovascular risk factors |                              |                                |                     |
|------------------------------------|-------------------------|-------------------------|---------------------------|---------------------------|-----------------------------|------------------------------|--------------------------------|---------------------|
|                                    | Cerebrovascular disease | Coronary artery disease | Abdominal aortic aneurysm | Peripheral artery disease | Hypertension                | Hyperlipidaemia <sup>a</sup> | Diabetes mellitus (type 1 + 2) | Renal insufficiency |
| Number of patients                 | 2801                    | 5999                    | 767                       | 1646                      | 8228                        | 12972                        | 2608                           | 1118                |
| <b>Medical history<sup>a</sup></b> |                         |                         |                           |                           |                             |                              |                                |                     |
| Cerebrovascular disease            | 2801 (100)              | 553 (9)                 | 117 (15)                  | 209 (13)                  | 1655 (20)                   | 2492 (19)                    | 442 (17)                       | 248 (22)            |
| Coronary artery disease            | 553 (20)                | 5999 (100)              | 322 (42)                  | 433 (26)                  | 3192 (39)                   | 5762 (44)                    | 1131 (43)                      | 497 (44)            |
| Abdominal aortic aneurysm          | 117 (4)                 | 322 (5)                 | 767 (100)                 | 134 (8)                   | 466 (6)                     | 693 (5)                      | 114 (4)                        | 151 (14)            |
| Peripheral artery disease          | 209 (7)                 | 433 (7)                 | 134 (17)                  | 1646 (100)                | 906 (11)                    | 1492 (12)                    | 328 (13)                       | 205 (18)            |
| Hypertension                       | 1655 (60)               | 3192 (54)               | 466 (62)                  | 906 (57)                  | 8228 (100)                  | 7285 (57)                    | 1736 (68)                      | 902 (82)            |
| Hyperlipidaemia                    | 2492 (90)               | 5762 (96)               | 693 (91)                  | 1492 (92)                 | 7285 (90)                   | 12972 (100)                  | 2275 (88)                      | 1016 (92)           |
| Diabetes mellitus                  | 442 (16)                | 1131 (19)               | 114 (15)                  | 328 (20)                  | 1736 (21)                   | 2275 (18)                    | 2608 (100)                     | 365 (33)            |
| <b>Health questionnaire</b>        |                         |                         |                           |                           |                             |                              |                                |                     |
| Age (years)                        | 60 ± 11                 | 62 ± 10                 | 65 ± 9                    | 60 ± 11                   | 59 ± 12                     | 58 ± 12                      | 59 ± 12                        | 63 ± 11             |
| Male sex                           | 1744 (62)               | 4849 (81)               | 636 (83)                  | 1100 (67)                 | 5174 (63)                   | 8699 (67)                    | 1815 (70)                      | 911 (82)            |
| Previous or current smoking        | 2106 (76)               | 4511 (75)               | 661 (86)                  | 1473 (90)                 | 5697 (69)                   | 9265 (72)                    | 1865 (72)                      | 847 (76)            |
| Packyears in (former) smokers      | 20.2 (9.4 – 35.1)       | 20.7 (9.4 – 33.6)       | 28.0 (13.8 – 42.3)        | 27.9 (14.6 – 40.6)        | 18.9 (8.3 – 33.3)           | 18.9 (8.8 – 32.5)            | 21.0 (9.5 – 36.2)              | 22.8 (10.5 – 37.8)  |
| Current alcohol use                | 1484 (53)               | 3641 (61)               | 368 (48)                  | 770 (47)                  | 4787 (58)                   | 7584 (59)                    | 1229 (47)                      | 511 (46)            |
| Highest level of education         |                         |                         |                           |                           |                             |                              |                                |                     |
| - Primary/secondary school         | 554 (31)                | 1248 (29)               | 128 (34)                  | 315 (40)                  | 1764 (31)                   | 2569 (29)                    | 553 (35)                       | 210 (32)            |
| - Vocational school                | 631 (35)                | 1466 (35)               | 117 (31)                  | 236 (30)                  | 1824 (32)                   | 2891 (33)                    | 519 (33)                       | 223 (34)            |
| - University (of applied science)  | 560 (31)                | 1415 (33)               | 125 (33)                  | 196 (25)                  | 1914 (34)                   | 3031 (35)                    | 422 (27)                       | 194 (30)            |
| Exercise (METH/week)               | 0.0 (0.0 – 10.5)        | 0.0 (0.0 – 12.0)        | 0 (0.0 – 6.0)             | 0 (0.0 – 5.5)             | 0 (0.0 – 11.0)              | 0 (0.0 – 12.0)               | 0 (0.0 – 6.0)                  | 0 (0.0 – 5.5)       |
| <b>Medication use</b>              |                         |                         |                           |                           |                             |                              |                                |                     |
| Lipid-lowering therapy             | 1682 (60)               | 4995 (83)               | 417 (54)                  | 849 (52)                  | 4720 (57)                   | 8253 (64)                    | 1664 (64)                      | 678 (61)            |
| Antihypertensive therapy           | 1724 (62)               | 5409 (90)               | 545 (71)                  | 912 (55)                  | 7130 (87)                   | 9080 (70)                    | 1980 (76)                      | 965 (86)            |

|                                      |                   |                  |                   |                   |                   |                  |                   |                     |
|--------------------------------------|-------------------|------------------|-------------------|-------------------|-------------------|------------------|-------------------|---------------------|
| Platelet inhibitors                  | 2062 (74)         | 5263 (88)        | 450 (59)          | 987 (60)          | 4532 (55)         | 7694 (59)        | 1453 (56)         | 640 (57)            |
| Oral anticoagulant therapy           | 311 (11)          | 821 (14)         | 123 (16)          | 234 (14)          | 743 (9)           | 1188 (9)         | 271 (10)          | 182 (16)            |
| Glucose lowering therapy             | 287 (10)          | 757 (13)         | 67 (9)            | 189 (11)          | 1176 (14)         | 1475 (11)        | 1621 (62)         | 216 (19)            |
| <b>Anthropometric measurements</b>   |                   |                  |                   |                   |                   |                  |                   |                     |
| Systolic blood pressure (mmHg)       | 141 ± 22          | 137 ± 20         | 142 ± 20          | 144 ± 21          | 150 ± 23          | 140 ± 22         | 144 ± 21          | 150 ± 24            |
| Diastolic blood pressure (mmHg)      | 82 ± 12           | 80 ± 11          | 83 ± 12           | 81 ± 11           | 87 ± 14           | 83 ± 13          | 82 ± 12           | 85 ± 14             |
| Ankle-brachial index ≤0.9            | 398 (14)          | 680 (11)         | 165 (22)          | 1063 (66)         | 1195 (15)         | 1751 (14)        | 434 (17)          | 283 (26)            |
| Body mass index (kg/m <sup>2</sup> ) | 26.6 ± 4.2        | 27.3 ± 4.0       | 26.4 ± 3.8        | 26.3 ± 4.3        | 27.6 ± 4.6        | 27.0 ± 4.3       | 28.7 ± 5.0        | 27 ± 4              |
| Waist circumference (cm)             | 93.7 ± 12.9       | 97.4 ± 11.6      | 97.6 ± 12.1       | 95.0 ± 12.5       | 96.4 ± 13.3       | 95.1 ± 12.7      | 100.7 ± 13.7      | 98.9 ± 12.5         |
| Hip circumference (cm)               | 103.6 ± 8.7       | 104.2 ± 7.6      | 103.8 ± 7.8       | 103.0 ± 8.7       | 105.1 ± 9.2       | 104.1 ± 8.5      | 106.3 ± 9.8       | 104.4 ± 8.4         |
| Visceral fat (cm)                    | 8.6 ± 2.6         | 9.3 ± 2.6        | 9.5 ± 2.6         | 9.2 ± 2.7         | 9.0 ± 2.8         | 8.8 ± 2.7        | 10.1 ± 2.9        | 9.9 ± 2.8           |
| Subcutaneous fat (cm)                | 2.5 ± 1.2         | 2.4 ± 1.2        | 2.2 ± 1.1         | 2.4 ± 1.5         | 2.6 ± 1.4         | 2.5 ± 1.3        | 2.4 ± 1.4         | 2.2 ± 1.4           |
| Carotid artery stenosis              | 652 (24)          | 443 (8)          | 84 (11)           | 255 (16)          | 77 (10)           | 1104 (9)         | 283 (11)          | 181 (16)            |
| cIMT (mm)                            | 0.9 (0.7 – 1.0)   | 0.9 (0.7 – 1.0)  | 0.9 (0.8 – 1.1)   | 0.9 (0.8 – 1.1)   | 0.8 (0.7 – 1.0)   | 0.8 (0.7 – 1.0)  | 0.9 (0.7 – 1.0)   | 0.9 (0.8 – 1.1)     |
| Aortic aneurysm                      | 81 (3)            | 244 (4)          | 307 (41)          | 72 (4)            | 289 (4)           | 458 (4)          | 61 (2)            | 108 (10)            |
| Kidney size (cm)                     | 11.1 ± 1.0        | 11.3 ± 1.0       | 11.3 ± 1.0        | 11.2 ± 1.1        | 11.2 ± 1.0        | 11.2 ± 1.0       | 11.5 ± 1.0        | 10.9 ± 1.3          |
| <b>Laboratory measurements</b>       |                   |                  |                   |                   |                   |                  |                   |                     |
| Haemoglobin (mmol/L)                 | 8.9 ± 0.8         | 8.9 ± 0.8        | 8.8 ± 0.9         | 8.9 ± 0.9         | 8.9 ± 0.8         | 8.9 ± 0.8        | 8.8 ± 0.9         | 8.5 ± 1.0           |
| Total cholesterol (mmol/L)           | 4.9 ± 1.2         | 4.5 ± 1.1        | 5.1 ± 1.3         | 5.3 ± 1.3         | 5.0 ± 1.3         | 5.1 ± 1.4        | 4.7 ± 1.3         | 5.0 ± 1.4           |
| LDL-C (mmol/L)                       | 2.9 ± 1.1         | 2.6 ± 0.9        | 3.1 ± 1.1         | 3.2 ± 1.1         | 2.9 ± 1.1         | 3.1 ± 1.2        | 2.7 ± 1.0         | 2.9 ± 1.1           |
| HDL-C (mmol/L)                       | 1.3 ± 0.4         | 1.2 ± 0.3        | 1.2 ± 0.4         | 1.2 ± 0.4         | 1.3 ± 0.4         | 1.3 ± 0.4        | 1.2 ± 0.3         | 1.2 ± 0.4           |
| Apolipoprotein B (g/L)               | 0.8 ± 0.3         | 0.8 ± 0.2        | 0.9 ± 0.2         | 0.9 ± 0.3         | 0.9 ± 0.3         | 0.9 ± 0.3        | 0.9 ± 0.3         | 0.9 ± 0.3           |
| Triglycerides (mmol/L)               | 1.3 (0.9 – 1.9)   | 1.4 (1.0 – 2.0)  | 1.5 (1.1 – 2.1)   | 1.5 (1.1 – 2.3)   | 1.4 (1.0 – 2.1)   | 1.4 (1.0 – 2.1)  | 1.6 (1.1 – 2.4)   | 1.7 (1.2 – 2.5)     |
| HbA1c (mmol/mol)                     | 38 (36 – 42)      | 39 (36 – 43)     | 39 (36 – 43)      | 40 (37 – 48)      | 39 (36 – 44)      | 38 (36 – 43)     | 52 (45 – 62)      | 41 (37 – 52)        |
| Fasting glucose (mmol/L)             | 5.7 (5.3 – 6.3)   | 5.9 (5.4 – 6.6)  | 5.8 (5.4 – 6.5)   | 5.8 (5.3 – 6.7)   | 5.8 (5.4 – 6.6)   | 5.8 (5.3 – 6.4)  | 8.1 (6.9 – 10.0)  | 6.0 (5.5 – 7.2)     |
| eGFR (mL/min/1.73 m <sup>2</sup> )   | 48 ± 40           | 63 ± 34          | 58 ± 32           | 51 ± 40           | 49 ± 40           | 54 ± 40          | 55 ± 41           | 40 ± 26             |
| Albuminuria (mg/L)                   | 10.0 (6.0 – 24.1) | 9.0 (6.0 – 20.0) | 12.9 (8.0 – 39.9) | 11.0 (7.0 – 32.0) | 11.0 (7.0 – 29.0) | 9.0 (6.0 – 22.0) | 14.0 (8.0 – 41.0) | 82.0 (16.0 – 257.6) |
| CRP (mg/L)                           | 2.1 (1.0 – 4.5)   | 1.9 (1.0 – 4.0)  | 3.3 (1.6 – 6.9)   | 3.1 (1.4 – 6.3)   | 2.2 (1.0 – 4.7)   | 2.0 (1.0 – 4.2)  | 2.4 (1.1 – 5.1)   | 3.2 (1.5 – 7.2)     |
| TSH (mU/L)                           | 1.7 (1.2 – 2.5)   | 1.7 (1.2 – 2.5)  | 1.7 (1.2 – 2.5)   | 1.7 (1.2 – 2.5)   | 1.8 (1.2 – 2.6)   | 1.8 (1.2 – 2.5)  | 1.9 (1.3 – 2.7)   | 1.8 (1.3 – 2.7)     |

1  
2  
3 424 Data are presented as number (percentage), mean  $\pm$  standard difference or median (interquartile range).  
4

5 425 <sup>a</sup> Based on inclusion diagnosis, items of the health questionnaire and/or measurements at baseline:

6 426 Cerebrovascular disease: history of stroke, carotid surgery or percutaneous transluminal angioplasty;  
7

8 427 Coronary artery disease: history of myocardial infarction, cardiac arrest, coronary bypass surgery or percutaneous transluminal coronary angioplasty;  
9

10 428 Abdominal aortic aneurysm: history of abdominal aortic aneurysm, transluminal or surgical treatment of abdominal aortic aneurysm;  
11

12 429 Peripheral artery disease: history of amputation of (part of) lower limb, lower limb peripheral artery surgery or percutaneous transluminal angioplasty;  
13

14 430 Hypertension: treatment with antihypertensive drugs or blood pressure  $\geq 160/95$  mmHg at baseline measurement;  
15

16 431 Hyperlipidaemia: treatment with lipid-lowering agents, total cholesterol  $\geq 5$  mmol/L or LDL-cholesterol  $\geq 3.2$  mmol/L at baseline measurement;  
17

18 432 Diabetes mellitus: treatment with antidiabetic agents, fasting glucose  $\geq 7.0$  mmol/L or non-fasting glucose  $\geq 11.1$  mmol/L at baseline measurement;  
19

20 433 Renal insufficiency: creatinine  $> 120$  mmol/L and/or microprotein/creatinine ratio in urine  $> 20$ .  
21

22 434 Cut-off values applied at the start of UCC-SMART study, please note target values have changed over time and continuous variable are available.  
23

24 435 cIMT, carotid intima media thickness; CRP, C-reactive protein; CVD, cardiovascular disease; eGFR, estimated glomerular filtration rate; HbA1c, glycosylated haemoglobin  
25

26 436 type A1C; HDL-C, high-density lipoprotein cholesterol; LDL-C, low-density lipoprotein cholesterol; MET, metabolic equivalent of task; TSH: thyroid stimulation hormone.  
27  
28  
29  
30  
31  
32  
33  
34  
35  
36  
37  
38  
39  
40  
41  
42  
43  
44  
45  
46

1  
2  
3 437 **Findings to date**  
4

5 438 The findings of this section are reported for patients included up to January 2020 (n = 13,898), because  
6  
7 439 the collection and processing of outcome events has been completed up until this date. These patients  
8  
9 440 contributed to a total follow-up time of 134,439 person-years. Median follow-up time was 9.2 years  
10  
11 441 (interquartile range 4.8 – 14.1 years). During follow-up, 2,259 (16%) patients suffered a first combined  
12  
13 442 major cardiovascular endpoint (including non-fatal myocardial infarction, non-fatal stroke or  
14  
15 443 cardiovascular death). Furthermore, there were 943 (7%) cases of incident diabetes, 105 (1%) cases of  
16  
17 444 end-stage kidney disease, 161 (1%) cases of heart failure and 434 (3%) cases of major bleeding. A total  
18  
19 445 of 3,264 (23%) patients underwent a vascular intervention during follow-up. Of patients with established  
20  
21 446 CVD, 1,906 patients (21%) suffered the combined vascular endpoint mentioned above as subsequent  
22  
23 447 event, whereas 353 patients (7%) with severe risk factors without prior CVD experienced this combined  
24  
25 448 outcome as their first ever event. Of the 2,450 individuals with diabetes at baseline, 568 (23%)  
26  
27 449 individuals suffered the combined vascular endpoint. Corresponding incidence rates are 21.2 per 1000  
28  
29 450 person years for patients with established CVD and 8.2 per 1000 person years for patients without a  
30  
31 451 history of CVD. Numbers and observed incidence rates of all specific outcome events of interest are  
32  
33 452 listed in Table 2. Through linkage with the Dutch National Cancer Registry, a total of 2,139 patients  
34  
35 453 (15%) was diagnosed with cancer during follow-up. This includes 414 diagnoses of lung cancer, 354 of  
36  
37 454 prostate cancer, 294 of intestinal cancer and 163 of breast cancer as most common diagnoses.  
38  
39  
40  
41  
42  
43  
44  
45  
46  
47  
48  
49  
50  
51  
52  
53  
54  
55  
56  
57  
58  
59  
60

456 Table 2. Number and incidence rates of outcome events from 1996 to 2020

| Outcome event                          | Number of first events | Person-years of follow-up | Incidence rate per 1,000 person-years |
|----------------------------------------|------------------------|---------------------------|---------------------------------------|
| <b>Non-fatal stroke</b>                | 613                    | 131,684                   | 4.66                                  |
| Ischemic stroke                        | 502                    | 132,042                   | 3.80                                  |
| Haemorrhagic infarction                | 20                     | 134,362                   | 0.15                                  |
| Intracerebral haemorrhage              | 66                     | 134,285                   | 0.49                                  |
| Subarachnoid haemorrhage               | 17                     | 134,322                   | 0.13                                  |
| Type not determined                    | 8                      | 134,430                   | 0.06                                  |
| <b>Retinal syndromes</b>               | 16                     | 134,338                   | 0.12                                  |
| Infarction                             | 13                     | 134,353                   | 0.10                                  |
| Haemorrhage                            | 3                      | 134,424                   | 0.02                                  |
| <b>Non-fatal myocardial infarction</b> | 793                    | 130,065                   | 6.10                                  |
| <b>Heart failure</b>                   | 161                    | 134,075                   | 1.20                                  |
| Systolic heart failure, due to         | 115                    | 134,203                   | 0.86                                  |
| coronary disease                       | 85                     | 134,266                   | 0.63                                  |
| valve disorders                        | 11                     | 134,425                   | 0.08                                  |
| other causes                           | 19                     | 134,390                   | 0.14                                  |
| HFpEF, due to                          | 46                     | 134,311                   | 0.34                                  |
| coronary disease                       | 15                     | 134,390                   | 0.11                                  |
| valve disorders                        | 8                      | 134,418                   | 0.06                                  |
| other causes                           | 23                     | 134,381                   | 0.17                                  |
| <b>Non-fatal rupture AAA</b>           | 5                      | 139,895                   | 0.04                                  |
| <b>End-stage kidney disease</b>        | 105                    | 134,118                   | 0.78                                  |
| <b>Vascular intervention</b>           | 3,264                  | 110,154                   | 29.6                                  |
| Heart                                  | 1606                   | 121,936                   | 13.2                                  |
| Carotid or intracranial arteries       | 240                    | 132,611                   | 1.81                                  |
| Aorta                                  | 439                    | 131,553                   | 3.34                                  |
| Peripheral arteries                    | 953                    | 127,914                   | 7.45                                  |
| Renal artery                           | 62                     | 133,970                   | 0.46                                  |
| <b>Major bleeding</b>                  |                        |                           |                                       |
| ISTH major bleeding                    | 434                    | 129,804                   | 3.34                                  |
| BARC 3 or 5 bleeding                   | 457                    | 132,497                   | 3.45                                  |
| <b>Incident diabetes</b>               | 943                    | 124,310                   | 7.59                                  |
| Type 1 diabetes                        | 1                      | 131,417                   | 0.01                                  |
| Type 2 diabetes                        | 942                    | 124,330                   | 7.58                                  |

|                                    |       |         |       |
|------------------------------------|-------|---------|-------|
| <b>Vascular mortality</b>          | 1,267 | 134,439 | 9.42  |
| Fatal cerebral infarction          | 85    |         | 0.63  |
| Fatal cerebral haemorrhage         | 65    |         | 0.48  |
| Fatal stroke – type not determined | 21    |         | 0.16  |
| Fatal myocardial infarction        | 63    |         | 0.47  |
| Fatal heart failure                | 198   |         | 1.47  |
| Fatal rupture AAA                  | 29    |         | 0.22  |
| Sudden death                       | 401   |         | 2.98  |
| Other                              | 405   |         | 3.01  |
| <b>Non-vascular mortality</b>      | 1317  | 134,439 | 9.80  |
| Fatal malignancy                   | 800   |         | 5.95  |
| Fatal infection                    | 169   |         | 1.26  |
| Unnatural death                    | 58    |         | 0.43  |
| Other                              | 290   |         | 2.16  |
| <b>All-cause mortality</b>         | 2,794 | 134,439 | 20.78 |
| <b>Malignancy<sup>a</sup></b>      | 2,139 | 127,514 | 16.77 |
| Lung                               | 414   |         | 3.25  |
| Prostate                           | 354   |         | 2.78  |
| Breast                             | 163   |         | 1.28  |
| Intestinal                         | 294   |         | 2.31  |
| Other                              | 914   |         | 7.17  |

<sup>a</sup> Other subtypes of cancer in the dataset include cancer of the lip, oral cavity or pharynx; oesophagus; stomach; liver, intrahepatic bile ducts, or gallbladder; pancreas; respiratory tract; thymus; bone or articular cartilage of limb; melanoma; mesothelial or soft tissue; vulva or vagina; cervix uteri or corpus uteri; ovary; penis or testes; kidney, renal pelvis or ureter; bladder; eye, brain, and other parts of the central nervous system; thyroid gland; lymphatic/hematopoietic.

AAA, abdominal aortic aneurysm; BARC, Bleeding Academic Research Consortium; HFpEF, heart failure with preserved ejection fraction; ISTH, International Society on Thrombosis and Haemostasis.



1  
2  
3 465 The large database of observational data has been used for over 350 etiological and prognostic  
4  
5 466 studies so far, and the coverage of a wide age range and long follow-up provides opportunity to develop  
6  
7 467 and validate prediction models. This has been done with the SMART risk score[42,43], the SMART-  
8  
9 468 REACH lifetime model for patients with previous CVD[3] and the DIAL lifetime model[44] for patients  
10  
11 469 with type 2 diabetes (to be found at <https://u-prevent.com> and the ESC ‘CVD risk calculation’-app).  
12  
13 470 These estimates serve clinical practice by providing insight into risk and thus supporting patient  
14  
15 471 education and shared decision making. Moreover, routinely collection of patient data allows for  
16  
17 472 embedding clinical trials within the cohort, as has been done with, amongst others, TEMPUS[37] and  
18  
19 473 SMART-Inform[38].

22 474 The vascular screening in the UCC-SMART study is a structured uniform program to detect risk  
23  
24 475 factors and asymptomatic atherosclerosis and provides a basis for optimizing treatment of high-risk  
25  
26 476 patients. In a previous study comparing the UCC-SMART screening program to usual care in another  
27  
28 477 university hospital in the Netherlands, a beneficial effect of the screening program on SBP and LDL-C  
29  
30 478 was seen.[36] Previous research on screening programs in the general population shows improvement  
31  
32 479 of cardiovascular risk factors and detection of patients at risk, but conflicting results are found on  
33  
34 480 mortality and cardiovascular events.[2,45] In a population at risk (e.g. with hypertension or diabetes),  
35  
36 481 the beneficial effect of cardiovascular screening is more pronounced.[2,46] In addition, a higher baseline  
37  
38 482 achievement of secondary prevention targets is associated with improved cardiovascular health  
39  
40 483 outcomes in patients with established CVD and type 2 diabetes.[47]

43 484

### 45 485 **Strengths and limitations**

47 486 The UCC-SMART study is a unique ongoing prospective cohort study in over 14,000 patients with a  
48  
49 487 history of various manifestations of CVD or severe cardiovascular risk factors, providing a large up-to-  
50  
51 488 date cohort of a population at high cardiovascular risk. Collecting diverse outcome events in this  
52  
53 489 population allows for research on risk factors for different manifestations of CVD and incident diabetes.  
54  
55 490 Linkage to multiple registries facilitates the investigation of relationships between cardiovascular risk  
56  
57 491 factors and diseases and other conditions such as cancer and dementia. By the integration of health care  
58  
59 492 and scientific research, patient care becomes more complete and data already to be collected for patient

1  
2  
3 493 care is used to increase knowledge of CVD, whilst the additive burden for participating patients is  
4  
5 494 limited.

6  
7 495 The main strengths of the UCC-SMART cohort include the large size, its capture of a high-risk  
8  
9 496 population with various CVD manifestations and risk factors with few exclusion criteria, the use of a  
10  
11 497 standardized diagnostic protocol, the long follow-up duration and the comprehensive capture of a wide  
12  
13 498 range of data. Because inclusion of patients is still ongoing, the UCC-SMART cohort provides a good  
14  
15 499 representation of the past and current population of patients at high cardiovascular risk. Due to the high  
16  
17 500 risk study population, the prevalence and incidence of the main outcome variables are higher than in the  
18  
19 501 general population, thereby increasing the power to study these outcomes. Furthermore, all outcome  
20  
21 502 events are adjudicated independently by three physicians of the endpoint committee, reducing the risk  
22  
23 503 of misclassification. The proportion of missing data is small, possibly explained by the protocolized  
24  
25 504 screening program taking place in one day. The substudies provide additional information on specific  
26  
27 505 cardiovascular risk factors (e.g. parental history of CVD[48], characteristics related to left ventricle  
28  
29 506 hypertrophy[31], and the presence of diffuse idiopathic skeletal hyperostosis[49]), manifestations of  
30  
31 507 atherosclerosis (e.g. brain changes on MRI[25] and cognitive decline[26]), and other important aspects  
32  
33 508 in cardiovascular risk management (e.g. the effect of a cardiovascular polypill[50]).

34  
35  
36 509 Limitations also need to be considered. Due to the prospective observational design, for the  
37  
38 510 majority of the patients, risk factors and medication use are only recorded at baseline and may have  
39  
40 511 changed during follow-up. This could be reflected by the finding of this article that not all patients with  
41  
42 512 CVD meet treatment goals for modifiable risk factors at baseline. Since patients are included several  
43  
44 513 weeks to months after an index CVD event, risk factors are likely to be further optimized during this  
45  
46 514 period after baseline examination. For a subset of patients with CVD or diabetes, a repeat of the baseline  
47  
48 515 measurements after a median of 9.9 years is indeed available, allowing for investigating the course of  
49  
50 516 atherosclerosis over time. Furthermore, in 10.6% of the included patients, follow-up ended due to either  
51  
52 517 withdrawal of participation in further follow-up (8.5%) or being unreachable for further questionnaires  
53  
54 518 (2.1%). Yet, the median follow-up time for these patients is 7.4 years, so those patients still contribute  
55  
56 519 to a fair amount of patient-years. In addition, because UCC-SMART is a single-center study in a  
57  
58 520 university hospital, it can be disputed whether it represents the general high risk population and patients

1  
2  
3 521 with established CVD. The UMC Utrecht provides care to nationwide patients referred for complex and  
4  
5 522 specialized care, but also to patients referred by general practitioners from the region. Patients included  
6  
7 523 in UCC-SMART correspond to patients with severe cardiovascular risk factors or established CVD from  
8  
9 524 the general population. As reflected by the inclusion criteria, the UCC-SMART study does not include  
10  
11 525 patients requiring highly specialized care (including heart transplantation and rare causes of vascular  
12  
13 526 disease). Lastly, except for information on education level, the database does not contain extensive  
14  
15 527 information on socioeconomic status.

16  
17  
18 528 In conclusion, we have provided an updated extensive overview of the design of the UCC-  
19  
20 529 SMART study as well as an overview of the findings to date. This underlines the value of the UCC-  
21  
22 530 SMART study as a basis for contemporary and future epidemiologic research in CVD using a well-  
23  
24 531 characterized high risk cardiovascular population with long-term follow-up. A future goal is to make  
25  
26 532 the UCC-SMART data Findable, Accessible, Interoperable and Reusable (FAIR).[51]  
27

28 533

### 30 534 **Collaboration**

31  
32  
33 535 The UCC-SMART study group directs the academic focus of research using the UCC-SMART data and  
34  
35 536 consists of staff members from both epidemiological and clinical departments. All data presented in this  
36  
37 537 manuscript will be available upon reasonable request, and specific datasets will be compiled based on  
38  
39 538 the research proposal. The data is to be used only for the purposes as described in the research proposal.  
40  
41 539 Datasets are provided to interested researchers after approval of request by the UCC-SMART study  
42  
43 540 group. Access to the data request module can be applied for via [ucc-smart@umcutrecht.nl](mailto:ucc-smart@umcutrecht.nl). We  
44  
45 541 encourage collaborations within overarching cardiovascular topics in which datasets are combined.  
46

47 542

### 49 543 **Acknowledgements**

50  
51 544 We gratefully acknowledge the contribution of the participants, the research nurses, R. van Petersen  
52  
53 545 (data-manager), A. Vandersteen (study manager), the founders of the SMART-study in 1996: A. Algra,  
54  
55 546 J.D. Banga, B.C. Eikelboom and Y. van der Graaf, and the members of the UCC-SMART study group:  
56  
57 547 M.J. Cramer, H.M. Nathoe and M.G. van der Meer (co-PI), Department of Cardiology; G.J. de Borst  
58  
59 548 and M. Teraa (co-PI), Department of Vascular Surgery; M.L. Bots and M. van Smeden, Julius Center

1  
2  
3 549 for Health Sciences and Primary Care; M.H. Emmelot-Vonk, Department of Geriatrics; P.A. de Jong,  
4  
5 550 Department of Radiology; A.T. Lely, Department of Gynaecology and Obstetrics; N.P. van der Kaaij,  
6  
7 551 Department of Cardiothoracic Surgery; L.J. Kappelle and Y.M. Ruigrok, Department of Neurology;  
8  
9 552 M.C. Verhaar, Department of Nephrology & Hypertension; J.A.N. Dorresteyn (co-PI) and F.L.J.  
10  
11 553 Visseren (PI), Department of Vascular Medicine, UMC Utrecht.

12 554

### 15 555 **Contributors**

16  
17 556 F.L.J.V., J.W., S.H.J.H., M.C.C. and M.A.G.H. contributed to the conception and design of the work.  
18  
19 557 M.A.G.H. and M.C.C. drafted the manuscript and contributed equally to this paper. M.C.C., M.A.G.H.,  
20  
21 558 S.H.J.H., F.W.A., G.J.B., M.L.B., M.J.C., J.A.N.D., M.H.E-V., M.I.G., P.A.J., N.K., J.K., A.T.L.,  
22  
23 559 M.G.M., B.M.M., H.M.N., C.O.-M., R.B.P., Y.M.R., M.S., M.T., A.V., M.C.V., J.W. and F.L.J.V  
24  
25 560 contributed to the interpretation of data and critically revised the manuscript. All gave final approval  
26  
27 561 and agreed to be accountable for all aspects of work ensuring integrity and accuracy.

28 562

### 31 563 **Funding**

32  
33 564 The UCC-SMART study was financially supported by the UMC Utrecht, the Netherlands. The  
34  
35 565 supporting sources had no involvement in study design, analysis, interpretation, writing of the results,  
36  
37 566 or the decision to submit for publication.

38 567

### 41 568 **Competing interests**

42  
43 569 None declared.

44 570

### 47 571 **Patient consent for publication**

48  
49 572 Not applicable.

50 573

1  
2  
3 574 **Ethics approval**  
4

5 575 The study is in accordance with the Helsinki declaration and the Good Clinical Practice guidelines,  
6  
7 576 and is approved by the ethics committee of the UMC Utrecht in 1996, 2014 and 2022 (reference  
8  
9 577 number 22-088).  
10

11 578

12  
13  
14 579

15  
16 580 **References**  
17

- 18 581 [1] Roth GA, Mensah GA, Johnson CO, Addolorato G, Ammirati E, Baddour LM, et al. Global  
19  
20 582 Burden of Cardiovascular Diseases and Risk Factors, 1990-2019: Update From the GBD 2019  
21  
22 583 Study. *J Am Coll Cardiol*. 2020;76(25):2982–3021.  
23  
24 584 [2] Visseren FLJ, Mach F, Smulders YM, Carballo D, Koskinas KC, Bäck M, et al. 2021 ESC  
25  
26 585 Guidelines on cardiovascular disease prevention in clinical practice. *Eur J Prev Cardiol*.  
27  
28 586 2022;29(1):5–115.  
29  
30 587 [3] Kaasenbrood L, Bhatt DL, Dorresteijn JAN, Wilson PWF, D’Agostino RB, Massaro JM, et al.  
31  
32 588 Estimated life expectancy without recurrent cardiovascular events in patients with vascular  
33  
34 589 disease: The SMART-REACH model. *J Am Heart Assoc*. 2018;7(16).  
35  
36 590 [4] Adler A, Agodoa L, Algra A, Asselbergs FW, Beckett NS, Berge E, et al. Pharmacological  
37  
38 591 blood pressure lowering for primary and secondary prevention of cardiovascular disease across  
39  
40 592 different levels of blood pressure: an individual participant-level data meta-analysis. *Lancet*.  
41  
42 593 2021;397(10285):1625–36.  
43  
44 594 [5] Collins R, Reith C, Emberson J, Armitage J, Baigent C, Blackwell L, et al. Interpretation of the  
45  
46 595 evidence for the efficacy and safety of statin therapy. *Lancet*. 2016;388(10059):2532–61.  
47  
48 596 [6] Simons PCG, Algra A, Van De Laak MF, Grobbee DE, Van Der Graaf Y. Second  
49  
50 597 manifestations of ARterial disease (SMART) study: Rationale and design. *Eur J Epidemiol*.  
51  
52 598 1999;15(9):773–81.  
53  
54 599 [7] Rose GA, Blackburn H. Cardiovascular survey methods. *Monogr Ser World Health Organ*.  
55  
56 600 1968;56:1–188.  
57  
58 601 [8] Sluik D, Geelen A, De Vries JHM, Eussen SJPM, Brants HAM, Meijboom S, et al. A national  
59  
60

- 1  
2  
3 602 FFQ for the Netherlands (the FFQ-NL 1.0): Validation of a comprehensive FFQ for adults. *Br J*  
4  
5 603 *Nutr.* 2016;116(5):913–23.
- 6  
7 604 [9] Tremblay AJ, Morrisette H, Gagné JM, Bergeron J, Gagné C, Couture P. Validation of the  
8  
9 605 Friedewald formula for the determination of low-density lipoprotein cholesterol compared with  
10  
11 606  $\beta$ -quantification in a large population. *Clin Biochem.* 2004;37(9):785–90.
- 12  
13 607 [10] Levey AS, Stevens LA, Schmid CH, Zhang Y, Castro AF, Feldman HI, et al. A new equation  
14  
15 608 to estimate glomerular filtration rate. *Ann Intern Med.* 2009;150(9):604–12.
- 16  
17 609 [11] Kusnierz-Cabala B, Gernand W, Zabek-Adamska A, Tokarz A, Naskalski JW. Comparison of  
18  
19 610 high-sensitivity C-reactive protein serum assay results obtained using Dade-Behring BNII  
20  
21 611 nephelometer and Ortho Vitros FS 5.1 clinical analyzer in respect of CRP-related risk  
22  
23 612 assessment of chronic metabolic diseases. *Clin Lab.* 2008;54(9–10):341–6.
- 24  
25 613 [12] Stolk R, Wink O, Zelissen P, Meijer R, van Gils A, Grobbee D. Validity and reproducibility of  
26  
27 614 ultrasonography for the measurement of intra-abdominal adipose tissue. *Int J Obes.* 2001 Sep  
28  
29 615 12;25(9):1346–51.
- 30  
31 616 [13] Bazzocchi A, Filonzi G, Ponti F, Albisinni U, Guglielmi G, Battista G. Ultrasound: Which role  
32  
33 617 in body composition? *Eur J Radiol.* 2016 Aug;85(8):1469–80.
- 34  
35 618 [14] Lang RM, Badano LP, Mor-Avi V, Afilalo J, Armstrong A, Ernande L, et al.  
36  
37 619 Recommendations for cardiac chamber quantification by echocardiography in adults: an  
38  
39 620 update from the American Society of Echocardiography and the European Association of  
40  
41 621 Cardiovascular Imaging. *J Am Soc Echocardiogr Off Publ Am Soc Echocardiogr.* 2015  
42  
43 622 Jan;28(1):1-39.e14.
- 44  
45 623 [15] Devereux RB, Alonso DR, Lutas EM, Gottlieb GJ, Campo E, Sachs I, et al. Echocardiographic  
46  
47 624 assessment of left ventricular hypertrophy: comparison to necropsy findings. *Am J Cardiol.*  
48  
49 625 1986 Feb;57(6):450–8.
- 50  
51 626 [16] Nagueh SF, Smiseth OA, Appleton CP, Byrd BF 3rd, Dokainish H, Edvardsen T, et al.  
52  
53 627 Recommendations for the Evaluation of Left Ventricular Diastolic Function by  
54  
55 628 Echocardiography: An Update from the American Society of Echocardiography and the  
56  
57 629 European Association of Cardiovascular Imaging. *J Am Soc Echocardiogr Off Publ Am Soc*

- 1  
2  
3 630 Echocardiogr. 2016 Apr;29(4):277–314.  
4  
5 631 [17] Koene RJ, Prizment AE, Blaes A, Konety SH. Shared risk factors in cardiovascular disease and  
6  
7 632 cancer. *Circulation*. 2016;133(11):1104–14.  
8  
9 633 [18] DHD. Ontdek de mogelijkheden van de LBZ [Internet]. 2022. Available from:  
10  
11 634 <https://www.dhd.nl/producten-diensten/registratie-data/ontdek-de-mogelijkheden-van-de-lbz>  
12  
13 635 [19] Nivel. Methode vaststellen cijfers zorgverlening huisartsen [Internet]. 2022. Available from:  
14  
15 636 [https://www.nivel.nl/nl/nivel-zorgregistraties-eerste-lijn/methoden/methoden-vaststellen-](https://www.nivel.nl/nl/nivel-zorgregistraties-eerste-lijn/methoden/methoden-vaststellen-cijfers-zorgverlening/methode-vaststellen-cijfers-zorgverlening-huisartsen)  
16  
17 637 [cijfers-zorgverlening/methode-vaststellen-cijfers-zorgverlening-huisartsen](https://www.nivel.nl/nl/nivel-zorgregistraties-eerste-lijn/methoden/methoden-vaststellen-cijfers-zorgverlening/methode-vaststellen-cijfers-zorgverlening-huisartsen)  
18  
19 638 [20] ten Berg MJ, Huisman A, van den Bemt PMLA, Schobben AFAM, Egberts ACG, van Solinge  
20  
21 639 WW. Linking laboratory and medication data: new opportunities for pharmacoepidemiological  
22  
23 640 research. *Clin Chem Lab Med*. 2007;45(1):13–9.  
24  
25 641 [21] Patel RS, Asselbergs FW. The GENIUS-CHD consortium. *Eur Heart J*. 2015 Oct;36(40):2674–  
26  
27 642 6.  
28  
29 643 [22] Matsushita K, Ballew SH, Astor BC, Jong PE de, Gansevoort RT, Hemmelgarn BR, et al.  
30  
31 644 Cohort profile: the chronic kidney disease prognosis consortium. *Int J Epidemiol*. 2013  
32  
33 645 Dec;42(6):1660–8.  
34  
35 646 [23] SFK. Foundation for Pharmaceutical Statistics [Internet]. [cited 2022 Dec 15]. Available from:  
36  
37 647 <https://www.sfk.nl/english>  
38  
39 648 [24] Franssens BT, Nathoe HM, Leiner T, Van Der Graaf Y, Visseren FLJ. Relation between  
40  
41 649 cardiovascular disease risk factors and epicardial adipose tissue density on cardiac computed  
42  
43 650 tomography in patients at high risk of cardiovascular events. *Eur J Prev Cardiol*.  
44  
45 651 2017;24(6):660–70.  
46  
47 652 [25] Geerlings MI, Appelman APA, Vincken KL, Algra A, Witkamp TD, Mali WPTM, et al. Brain  
48  
49 653 volumes and cerebrovascular lesions on MRI in patients with atherosclerotic disease. The  
50  
51 654 SMART-MR study. *Atherosclerosis*. 2010;210(1):130–6.  
52  
53 655 [26] Grool AM, Van Der Graaf Y, Mali WPTM, Geerlings MI. Location of cerebrovascular and  
54  
55 656 degenerative changes, depressive symptoms and cognitive functioning in later life: The  
56  
57 657 SMART-Medea study. *J Neurol Neurosurg Psychiatry*. 2011;82(10):1093–100.

- 1  
2  
3 658 [27] Verhoeven BAN, Velema E, Schoneveld AH, de Vries JPPM, de Bruin P, Seldenrijk CA, et al.  
4  
5 659 Athero-express: differential atherosclerotic plaque expression of mRNA and protein in relation  
6  
7 660 to cardiovascular events and patient characteristics. Rationale and design. *Eur J Epidemiol.*  
8  
9 661 2004;19(12):1127–33.
- 11 662 [28] Weijmans M, Van Der Graaf Y, De Borst GJ, Asselbergs FW, Cramer MJ, Algra A, et al.  
13 663 Prevalence and risk of cardiovascular risk factors and events in offspring of patients at high  
15 664 vascular risk and effect of location of parental vascular disease. *Int J Cardiol.* 2015;195:195–  
17 665 202.
- 20 666 [29] Harlianto NI, Oosterhof N, Foppen W, Hol ME, Wittenberg R, van der Veen PH, et al. Diffuse  
22 667 idiopathic skeletal hyperostosis is associated with incident stroke in patients with increased  
24 668 cardiovascular risk. *Rheumatology.* 2021;1–8.
- 26 669 [30] Resnick D, Niwayama G. Radiographic and pathologic features of spinal involvement in  
28 670 diffuse idiopathic skeletal hyperostosis (DISH). *Radiology.* 1976 Jun;119(3):559–68.
- 30 671 [31] Meijs MFL, Bots ML, Vonken EJA, Cramer MJM, Melman PG, Velthuis BK, et al. Rationale  
32 672 and design of the SMART Heart study. *Netherlands Hear J.* 2007;15(9):295–8.
- 34 673 [32] Zwakenberg SR, De Jong PA, Hendriks EJ, Westerink J, Spiering W, De Borst GJ, et al.  
36 674 Intimal and medial calcification in relation to cardiovascular risk factors. *PLoS One.* 2020;15(7  
38 675 July):1–14.
- 41 676 [33] Schlösser FJV, Tangelder MJD, Verhagen HJM, van der Heijden GJMG, Muhs BE, van der  
43 677 Graaf Y, et al. Growth predictors and prognosis of small abdominal aortic aneurysms. *J Vasc*  
45 678 *Surg.* 2008;47(6):1127–33.
- 47 679 [34] Franssens BT, Eikendal AL, Leiner T, van der Graaf Y, Visseren FLJ, Hoogduin JM.  
49 680 Reliability and agreement of adipose tissue fat fraction measurements with water-fat MRI in  
51 681 patients with manifest cardiovascular disease. *NMR Biomed.* 2016;29(1):48–56.
- 53 682 [35] Goessens BMB, Visseren FLJ, de Nooijer J, van den Borne HW, Algra A, Wierdsma J, et al. A  
55 683 pilot-study to identify the feasibility of an Internet-based coaching programme for changing the  
57 684 vascular risk profile of high-risk patients. *Patient Educ Couns.* 2008;73(1):67–72.
- 59 685 [36] Brouwer BG, Visseren FLJ, Algra A, Van Bockel JH, Bollen ELEM, Doevendans PA, et al.



- 1  
2  
3 686 Effectiveness of a hospital-based vascular screening programme (SMART) for risk factor  
4  
5 687 management in patients with established vascular disease or type 2 diabetes: A parallel-group  
6  
7 688 comparative study. *J Intern Med.* 2010;268(1):83–93.
- 9 689 [37] Lafeber M, Grobbee DE, Bots ML, Thom S, Webster R, Rodgers A, et al. The Evening versus  
10  
11 690 Morning Polypill Utilization Study: The TEMPUS rationale and design. *Eur J Prev Cardiol.*  
12  
13 691 2014;21(4):425–33.
- 15 692 [38] Jaspers NEM, Visseren FLJ, Van Der Graaf Y, Smulders YM, Damman OC, Brouwers C, et al.  
16  
17 693 Communicating personalised statin therapy-effects as 10-year CVD-risk or CVD-free life-  
18  
19 694 expectancy: Does it improve decisional conflict? Three-armed, blinded, randomised controlled  
20  
21 695 trial. *BMJ Open.* 2021;11(7):1–8.
- 24 696 [39] Brouwer BG. SMART risk factor screening in patients at high vascular risk [dissertation].  
25  
26 697 Utrecht University; 2008.
- 28 698 [40] Goessens BMB, Visseren FLJ, Sol BGM, de Man-Van Ginkel JM, Van Der Graaf Y. A  
29  
30 699 randomized, controlled trial for risk factor reduction in patients with symptomatic vascular  
31  
32 700 disease: The multidisciplinary Vascular Prevention by Nurses Study (VENUS). *Eur J Prev*  
33  
34 701 *Cardiol.* 2006;13(6):996–1003.
- 36 702 [41] Vernooij WP, Kaasjager HAH, Van Der Graaf Y, Wierdsma J, Grandjean HMM, Hovens  
37  
38 703 MMC, et al. Internet based vascular risk factor management for patients with clinically  
39  
40 704 manifest vascular disease: Randomised controlled trial. *BMJ.* 2012;344(7863):1–13.
- 43 705 [42] Dorresteijn JAN, Visseren FLJ, Wassink AMJ, Gondrie MJA, Steyerberg EW, Ridker PM, et  
44  
45 706 al. Development and validation of a prediction rule for recurrent vascular events based on a  
46  
47 707 cohort study of patients with arterial disease: The SMART risk score. *Heart.* 2013;99(12):866–  
48  
49 708 72.
- 51 709 [43] Hageman SHJ, McKay AJ, Ueda P, Gunn LH, Jernberg T, Hagström E, et al. Estimation of  
52  
53 710 recurrent atherosclerotic cardiovascular event risk in patients with established cardiovascular  
54  
55 711 disease: the updated SMART2 algorithm. *Eur Heart J.* 2022;
- 57 712 [44] Berkelmans GFN, Gudbjörnsdóttir S, Visseren FLJ, Wild SH, Franzen S, Chalmers J, et al.  
58  
59 713 Prediction of individual life-years gained without cardiovascular events from lipid, blood

- 1  
2  
3 714 pressure, glucose, and aspirin treatment based on data of more than 500 000 patients with Type  
4  
5 715 2 diabetes mellitus. *Eur Heart J.* 2019;40(34):2899–906.  
6  
7 716 [45] Cho JH, Han KD, Jung H-Y, Bond A. National health screening may reduce cardiovascular  
8  
9 717 morbidity and mortality among the elderly. *Public Health.* 2020 Oct;187:172–6.  
10  
11 718 [46] Antoku Y, Takemoto M, Mito T, Shiiyama R, Otsuka-Morisaki H, Tanaka A, et al. Impact of  
12  
13 719 Annual Cardiovascular Screening Tests in Patients with Type 2 Diabetes Mellitus without  
14  
15 720 Previous Histories of Cardiovascular Disease: Four-year Clinical Outcomes. *Intern Med.* 2021  
16  
17 721 Sep;60(17):2725–32.  
18  
19  
20 722 [47] Pagidipati NJ, Navar AM, Pieper KS, Green JB, Bethel MA, Armstrong PW, et al. Secondary  
21  
22 723 Prevention of Cardiovascular Disease in Patients With Type 2 Diabetes Mellitus. *Circulation.*  
23  
24 724 2017 Sep 26;136(13):1193–203.  
25  
26 725 [48] Weijmans M, van der Graaf Y, de Borst GJ, Nathoe HM, Algra A, Visseren FLJ, et al. Parental  
27  
28 726 history and the risk of subsequent vascular events in patients with clinically manifest vascular  
29  
30 727 disease: The effects of sex of the parent and vascular disease location. *Atherosclerosis.*  
31  
32 728 2014;234(1):129–35.  
33  
34  
35 729 [49] Harlianto NI, Westerink J, Foppen W, Hol ME, Wittenberg R, Van Der Veen PH, et al.  
36  
37 730 Visceral adipose tissue and different measures of adiposity in different severities of diffuse  
38  
39 731 idiopathic skeletal hyperostosis. *J Pers Med.* 2021;11(7):1–11.  
40  
41 732 [50] Lafeber M, Grobbee DE, Schrover IM, Thom S, Webster R, Rodgers A, et al. Comparison of a  
42  
43 733 morning polypill, evening polypill and individual pills on LDL-cholesterol, ambulatory blood  
44  
45 734 pressure and adherence in high-risk patients; A randomized crossover trial. *Int J Cardiol.*  
46  
47 735 2015;181:193–9.  
48  
49 736 [51] Wilkinson MD, Dumontier M, Aalbersberg IJ, Appleton G, Axton M, Baak A, et al. The FAIR  
50  
51 737 Guiding Principles for scientific data management and stewardship. *Sci Data.*  
52  
53 738 2016;3(1):160018.  
54  
55  
56  
57  
58  
59  
60

1  
2 **Figure legends**  
3

4 **Figure 1. Course of the UCC-SMART study**  
5

6 ECG, electrocardiogram; UCC-SMART, Utrecht Cardiovascular Cohort – Second Manifestations of  
7 Arterial Disease; UMC Utrecht, University Medical Centre Utrecht  
8  
9  
10  
11  
12  
13

14 **Figure 2. Timeline of measurements collected for or starting from a certain period**  
15

16 ACE, angiotensin converting enzyme; apoB, apolipoprotein B; CAC, coronary artery calcium; CRP,  
17 C-reactive protein; CT, computerized tomography; CV, cardiovascular; CVD, cardiovascular disease;  
18 HbA1c, glycated haemoglobin; Lp(a), lipoprotein a; MRI, magnetic resonance imaging; T, Tesla;  
19 TSH, thyroid stimulating hormone  
20  
21  
22  
23  
24  
25  
26  
27  
28

29 **Figure 3. Cumulative number of patients over time**  
30

31 Inclusion in the UCC-SMART study started in September 1996.  
32  
33  
34  
35  
36

37 **Figure 4. Distribution of inclusion diagnoses**  
38

39 CVD, cardiovascular disease; HIV, human immunodeficiency virus  
40  
41  
42  
43  
44  
45  
46  
47  
48  
49  
50  
51  
52  
53  
54  
55  
56  
57  
58  
59  
60

1  
2  
3  
4  
5  
6  
7  
8  
9  
10  
11  
12  
13  
14  
15  
16  
17  
18  
19  
20  
21  
22  
23  
24  
25  
26

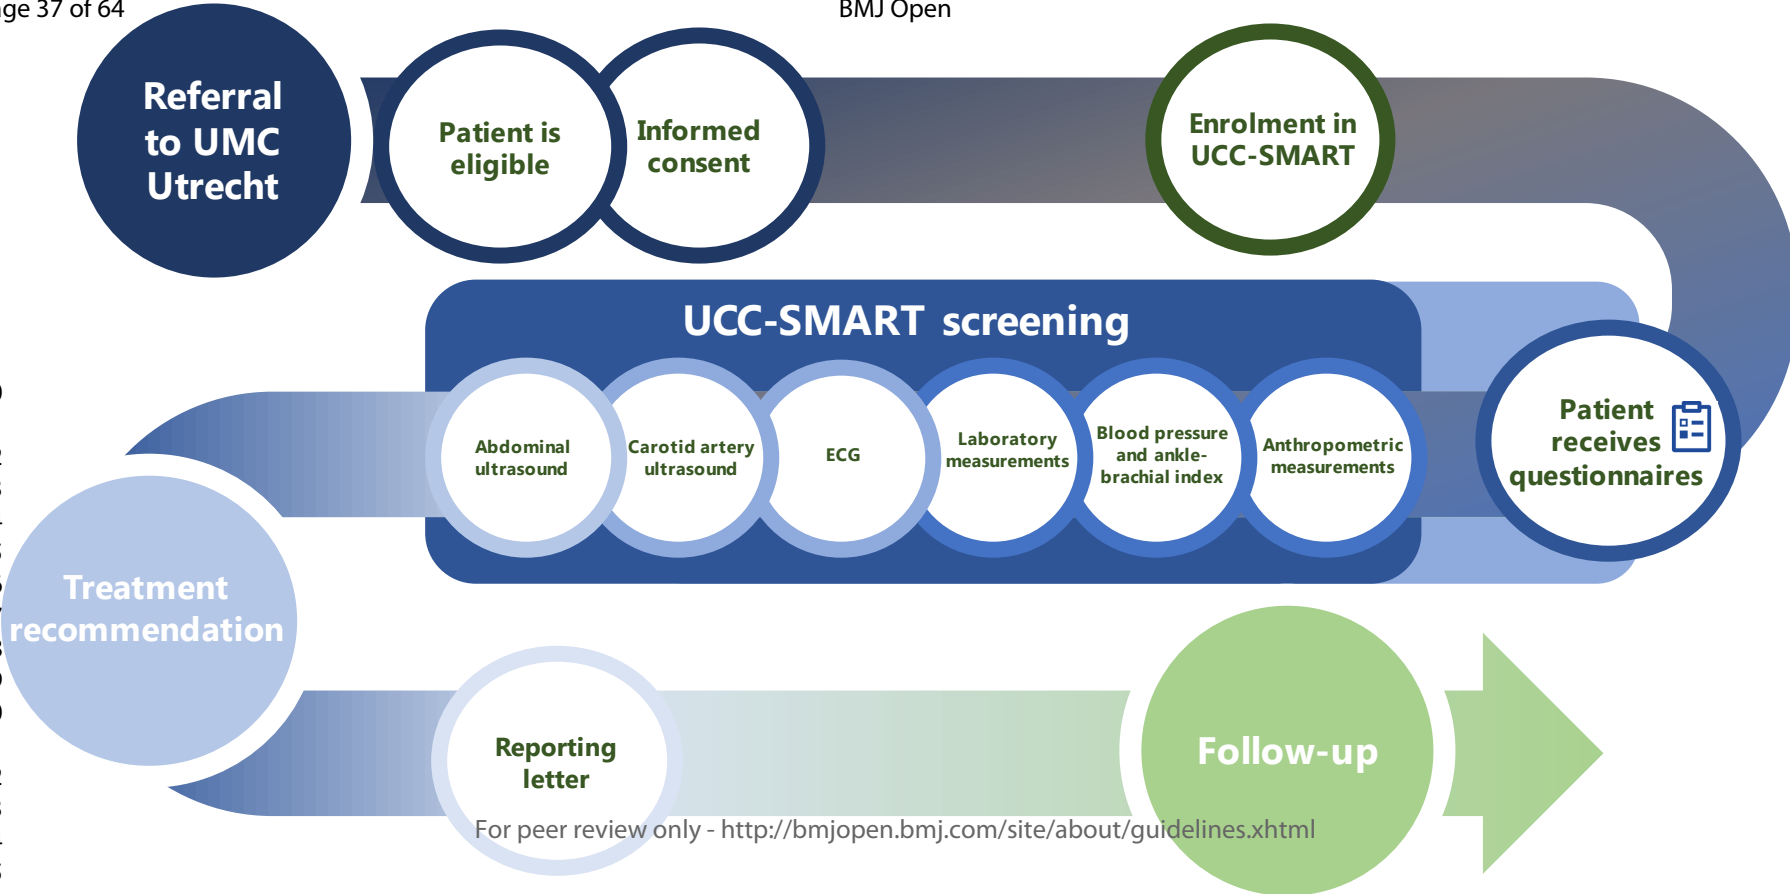





Total (n = 14,830)  
BMJ Open



Cardiovascular risk factor (n = 5,684)



History of CVD (n = 8,603)



1  
2  
3  
4  
5  
6  
7  
8  
9  
10  
11  
12  
13  
14  
15  
16  
17  
18  
19  
20  
21  
22  
23  
24  
25  
26  
27  
28  
29  
30  
31  
32  
33  
34  
35  
36  
37  
38

1  
2  
3  
4  
5  
6  
7  
8  
9  
10  
11  
12  
13  
14  
15  
16  
17  
18  
19  
20  
21  
22  
23  
24  
25  
26  
27  
28  
29  
30  
31  
32  
33  
34  
35  
36  
37  
38  
39  
40  
41  
42  
43  
44  
45  
46  
47  
48  
49  
50  
51  
52  
53  
54  
55  
56  
57  
58  
59  
60

## Supplementary material

**Cohort profile: the Utrecht Cardiovascular Cohort – Second Manifestations of Arterial Disease (UCC-SMART) study – an ongoing prospective cohort study of patients at high cardiovascular risk in the Netherlands**

For peer review only



1  
2  
3 **Content list**

4 Supplementary Table 1. Inclusion criteria and exclusion criteria ..... 3  
5  
6 Supplementary Table 2. Variables available in UCC-SMART ..... 5  
7  
8 Supplementary Table 3. Measurements that have been performed in the past ..... 7  
9  
10 Supplementary Table 4. Definitions of established cardiovascular disease ..... 8  
11  
12 Supplementary Table 5. Definitions of outcome events..... 9  
13  
14 Supplementary Table 6. Substudies of UCC-SMART ..... 12  
15  
16 Supplementary Table 7. Baseline characteristics of participants with complete follow-up and  
17 participants who were lost to follow-up ..... 19  
18  
19 Supplemental Figure 1. Timeline of substudies of UCC-SMART ..... 20  
20  
21  
22  
23  
24  
25  
26  
27  
28  
29  
30  
31  
32  
33  
34  
35  
36  
37  
38  
39  
40  
41  
42  
43  
44  
45  
46  
47  
48  
49  
50  
51  
52  
53  
54  
55  
56  
57  
58  
59  
60  
References ..... 22

**Supplementary Table 1. Inclusion criteria and exclusion criteria**

| Inclusion criteria                                                    | Definition                                                                                                                                                                                                                                                                                                                                                           |
|-----------------------------------------------------------------------|----------------------------------------------------------------------------------------------------------------------------------------------------------------------------------------------------------------------------------------------------------------------------------------------------------------------------------------------------------------------|
| One or more of the following cardiovascular diseases or risk factors: |                                                                                                                                                                                                                                                                                                                                                                      |
| Cardiovascular disease                                                |                                                                                                                                                                                                                                                                                                                                                                      |
| Transient ischemic attack                                             | Sudden onset, $\leq 24$ hours of:<br><i>carotid</i> : temporary motor weakness in one half of the body, language disorder, blindness in one eye<br><br><i>vertebrobasilar</i> : $\geq 2$ simultaneously: bilateral motor weakness or paraesthesia, dizziness, diplopia, dysphagia, ataxia, dysarthria<br><br><i>unknown vascular region</i> : hemianopia, dysarthria |
| Cerebral infarction                                                   | Criteria as for TIA, but duration of $> 24$ hours                                                                                                                                                                                                                                                                                                                    |
| Subarachnoid haemorrhage                                              | Sudden headache and (temporary) loss of consciousness, often accompanied by neck stiffness, nausea and vomiting, with blood in basal cisterns confirmed by CT or xanthochromia in cerebrospinal fluid                                                                                                                                                                |
| Carotid artery stenosis                                               | Duplex ultrasound confirmed stenosis or occlusion of $\geq 1$ carotid artery with diameter reduction $\geq 50\%$                                                                                                                                                                                                                                                     |
| Ischemic retinal syndrome                                             | Visual field defect diagnosed as retinal syndrome by ophthalmologist                                                                                                                                                                                                                                                                                                 |
| Angina pectoris                                                       | Chest pain with proven stenosis on coronary angiogram                                                                                                                                                                                                                                                                                                                |
| Myocardial infarction                                                 | $\geq 2$ of following:<br>- Chest pain $> 20$ minutes, not relieved by nitrates;<br>- ST elevation $> 1$ mm in 2 contiguous ECG leads, or left bundle branch block;<br>- Troponin levels $> 60$ ng/L with rise and fall pattern*                                                                                                                                     |
| Coronary syndrome requiring PCI or CABG                               |                                                                                                                                                                                                                                                                                                                                                                      |
| Abdominal aortic aneurysm                                             | Ultrasound confirmed local dilatation of abdominal aorta with anterior-posterior diameter $\geq 3$ cm and/or distal-proximal ratio of $> 1,5$                                                                                                                                                                                                                        |
| Renal artery stenosis                                                 | Stenosis of $\geq 1$ renal artery with lumen narrowing $\geq 50\%$ , caused by atherosclerosis                                                                                                                                                                                                                                                                       |
| Peripheral artery disease of the lower limbs                          | Fontaine classification:<br>- Fontaine II: intermittent claudication: pain (or other symptoms) in one or both legs after certain walking distance, disappearing at rest;<br>- Fontaine III: rest/nocturnal pain;<br>- Fontaine IV: ischemic ulceration, necrosis or gangrene; confirmed by ABI $\leq 0.90$ at rest and/or $\geq 20\%$ post-exercise decrease         |
| Cardiovascular risk factors                                           |                                                                                                                                                                                                                                                                                                                                                                      |
| Hypertension                                                          | Estimated as severe risk factor by physician, based on e.g. difficult-to-control hypertension, target organ damage, medical or family history                                                                                                                                                                                                                        |
| Hyperlipidaemia                                                       | Estimated as severe risk factor by physician, based on e.g. difficult-to-control hyperlipidaemia, suspected lipid metabolism disorder, medical or family history                                                                                                                                                                                                     |

|                                                                 |                                                                                                                         |
|-----------------------------------------------------------------|-------------------------------------------------------------------------------------------------------------------------|
| Diabetes mellitus                                               | Fasting glucose $\geq 7.0$ mmol/L, non-fasting glucose $\geq 11.1$ mmol/L or use of oral antidiabetic agents or insulin |
| Renal insufficiency                                             | Serum creatinine $> 120$ $\mu\text{mol/L}$                                                                              |
| HIV infection                                                   | Chronic infection with human immunodeficiency virus                                                                     |
| Family medical history                                          | Positive family history for premature cardiovascular disease in 1 <sup>st</sup> degree relatives                        |
| Pre-eclampsia†                                                  | Gestational hypertension accompanied by proteinuria, other maternal organ dysfunction or uteroplacental dysfunction     |
| HELLP syndrome†                                                 | Haemolysis, elevated liver enzymes, low platelets as a manifestation of pre-eclampsia                                   |
| Placental abruption†                                            | Gestational hypertension accompanied by placental abruption as an effect of uteroplacental insufficiency                |
| Intrauterine growth restriction†                                | Gestational hypertension accompanied by fetal growth restriction as an effect of uteroplacental insufficiency           |
| <b>Remaining inclusion criteria</b>                             |                                                                                                                         |
| 18 – 90 years of age                                            |                                                                                                                         |
| Independent in most daily activities                            | Rankin scale $\leq 3$ <sup>1</sup>                                                                                      |
| <b>Exclusion criteria</b>                                       |                                                                                                                         |
| Pregnancy                                                       |                                                                                                                         |
| Short life expectancy (per judgement of the treating physician) |                                                                                                                         |
| Insufficient understanding and expression of the Dutch language |                                                                                                                         |
| No informed consent                                             |                                                                                                                         |
| Follow-up impossible                                            |                                                                                                                         |

\* In earlier years of the UCC-SMART study, this laboratory item was defined as CK elevation of  $\geq 2$ x upper limit and MB-fraction  $> 5\%$  of total CK level.

† Hypertensive pregnancy complications are based on the ISSHP criteria<sup>2</sup>

ABI, ankle-brachial index; CABG, coronary artery bypass grafting; CK, creatine kinase; CT, computed tomography; ECG, electrocardiogram; HELLP, haemolysis, elevated liver enzymes and low platelets; HIV, human immunodeficiency virus; ISSHP, International Society for the Study of Hypertension in Pregnancy; PCI, percutaneous coronary intervention; TIA, transient ischemic attack.

**Supplementary Table 2. Variables available in UCC-SMART**

| Health questionnaire            | Medication use                   | Physical examination                 | Radiology measurements          | Laboratory measurements            |
|---------------------------------|----------------------------------|--------------------------------------|---------------------------------|------------------------------------|
| Medical history                 | Statins                          | Weight (kg)                          | Visceral fat (cm)               | Haemoglobin (mmol/L)               |
| Age (years)                     | Ezetimibe                        | Height (m)                           | Subcutaneous fat (cm)           | Haematocrit (%)                    |
| Sex                             | Fibrates                         | Blood pressure (mmHg)                | Carotid artery stenosis (%)     | Total cholesterol (mmol/L)         |
| Smoking and pack years          | Thiazide diuretics               | Ankle-brachial index                 | Carotid intima thickness (mm)   | LDL-C (mmol/L)                     |
| Alcohol use and number of units | Loop diuretics                   | Body mass index (kg/m <sup>2</sup> ) | Aortic artery diameter (cm)     | HDL-C (mmol/L)                     |
| Level of education              | Potassium saving diuretics       | Waist circumference (cm)             | Kidney size and volume (cm; mL) | Apolipoprotein B (g/L)             |
| Country of birth                | ACE-inhibitors                   | Hip circumference (cm)               | Electrocardiography             | Triglycerides (mmol/L)             |
| Quality of life*                | Angiotensin II-receptor blockers |                                      | Echocardiography†               | HbA1c (%)                          |
| Exercise (MET-hours per week)   | Aldosterone antagonists          |                                      |                                 | Fasting glucose (mmol/L)           |
|                                 | Beta-blockers                    |                                      |                                 | Fasting insulin (mU/L)             |
|                                 | Calcium antagonists              |                                      |                                 | Creatinine (μmol/L)                |
|                                 | Alpha blockers                   |                                      |                                 | eGFR (ml/min/1.73 m <sup>2</sup> ) |
|                                 | Central acting antihypertensives |                                      |                                 | Albuminuria (mg/L)                 |
|                                 | Direct vasodilators              |                                      |                                 | Albumin-to-creatinine ratio        |
|                                 | Aspirin                          |                                      |                                 | CRP (mg/L)                         |
|                                 | Clopidogrel                      |                                      |                                 | TSH (mU/L)                         |
|                                 | Dipyridamole                     |                                      |                                 | Lp(a)                              |
|                                 | DOAC                             |                                      |                                 | Urine sodium                       |
|                                 | Vitamin K antagonists            |                                      |                                 | Urine potassium                    |
|                                 | LMWH                             |                                      |                                 |                                    |
|                                 | Oral glucose-lowering therapy    |                                      |                                 |                                    |
|                                 | Insulin                          |                                      |                                 |                                    |
|                                 | Antidepressants                  |                                      |                                 |                                    |
|                                 | Benzodiazepines                  |                                      |                                 |                                    |

1  
2  
3 \* Based on EQ-5D questionnaire

4 † Echocardiography will be added to the UCC-SMART program in the near future

5 ACE, angiotensin converting enzyme; CRP, C-reactive protein; DOAC, direct oral anticoagulant; eGFR, estimated glomerular filtration rate; HbA1c,  
6 glycosylated haemoglobin type A1c; HDL-C, high-density lipoprotein cholesterol; LDL-C, low-density lipoprotein cholesterol; LMWH, low molecular  
7 weight heparin; Lp(a), lipoprotein(a); MET, metabolic equivalent of task; TSH, thyroid stimulating hormone; UCC-SMART, Utrecht Cardiovascular Cohort –  
8 Second Manifestations of Arterial Diseases  
9  
10  
11  
12  
13  
14  
15  
16  
17  
18  
19  
20  
21  
22  
23  
24  
25  
26  
27  
28  
29  
30  
31  
32  
33  
34  
35  
36  
37  
38  
39  
40  
41  
42  
43  
44  
45  
46

For peer review only

### Supplementary Table 3. Measurements that have been performed in the past

**Vascular wall stiffness** was determined from 2001 until 2003 using the Wall Track System that captures vascular diameter changes using radio-frequent signals. At the first signal, the position of the anterior and posterior vascular wall of the common carotid artery are marked at 2 cm proximal to the carotid bulb. Then, for five times on both the left and right side, changes in arterial diameter ( $\Delta D$ ) and end-diastolic diameter ( $D_d$ ) are registered during four seconds, and the mean is calculated. Carotid distension is defined as the change in artery diameter in systole relative to diastolic diameter. Other stiffness indices include  $\beta$  stiffness index ( $\ln(SBP/DBP)/(\Delta D/D_d)$ ), compliance coefficient ( $(\pi \times D_d \times \Delta D)/2 \times$  pulse pressure), distensibility coefficient ( $(2 \times \Delta D/D_d)/$  pulse pressure), Peterson's modulus (pressure change required for theoretical 100% increase in diameter) and Young's elastic modulus (pressure per  $\text{mm}^2$  required for theoretical 100% extension).

**Flow-mediated vasodilatation (FMD)** was assessed temporarily starting from March 1999. Here, the Wall Track System described above was used to capture the diameter of the brachial artery in the elbow crease. Following 3 baseline readings, new measurements were taken every 30 seconds for 5 minutes: first after a blood pressure cuff at the forearm was inflated to 100 mmHg above SBP for 4 minutes, and then after sublingual administration of 400  $\mu\text{g}$  of nitroglycerin. Endothelial function was defined as the proportional increase of diameter after nitrate and the baseline-adjusted maximal diameter following ischemia. This examination was stopped in June 2001, since analysis in the first 400 patients showed this measurement was not related to other known measures of atherosclerosis.

**Quality of life** information was collected through questionnaires based on the 36-Item Short Form Health Survey (SF-36)<sup>3</sup>, sent to participants from 2001 until 2019. This quality of life assessment contains scales for 1) limitations in physical activities; 2) limitations in social activities; 3) limitations in usual role activities because of physical health problems; 4) bodily pain; 5) mental health; 6) limitations in usual role activities because of emotional problems; 7) vitality and 8) general health perceptions.

**Homocysteine** was measured from 1998 until 2011 in fasting blood samples by high performance liquid chromatography with fluorescence detection. Up until 2000, a methionine loading test was performed in patients younger than 50 years. Plasma homocysteine was measured six hours after oral administration of 100mg methionine per kilogram bodyweight.

DBP, diastolic blood pressure; SBP; systolic blood pressure

**Supplementary Table 4. Definitions of established cardiovascular disease**

| <b>Cardiovascular disease</b> | <b>Definition of cardiovascular disease*</b>                                                                            |
|-------------------------------|-------------------------------------------------------------------------------------------------------------------------|
| Cerebrovascular disease       | TIA, cerebral infarction, ischemic retinal syndrome, carotid surgery or angioplasty in medical history                  |
| Coronary artery disease       | Myocardial infarction, angina pectoris, $\geq 1$ vessel disease on coronary angiography, PCI or CABG in medical history |
| Abdominal aortic aneurysm     | Abdominal aortic aneurysm, surgical or endovascular treatment of abdominal aortic aneurysm in medical history           |
| Peripheral artery disease     | Fontaine classification $\geq$ II, amputation, vascular surgery or angioplasty in medical history                       |

\* Definitions of these items are listed in Supplementary Table 1.

CABG, coronary artery bypass grafting; PCI, percutaneous coronary intervention; TIA, transient ischemic attack.

**Supplementary Table 5. Definitions of outcome events**

| <b>Outcome event</b>                        | <b>Definition of outcome event</b>                                                                                                                                                                                                                                                                                                                                         |
|---------------------------------------------|----------------------------------------------------------------------------------------------------------------------------------------------------------------------------------------------------------------------------------------------------------------------------------------------------------------------------------------------------------------------------|
| <b>Primary endpoints</b>                    |                                                                                                                                                                                                                                                                                                                                                                            |
| <b>Stroke</b>                               |                                                                                                                                                                                                                                                                                                                                                                            |
| Ischemic stroke / haemorrhagic infarction   | >24 hours of associated clinical signs causing increased disability of $\geq 1$ grade on modified Rankin scale <sup>1</sup> , and new (haemorrhagic) infarction on CT or MRI <2 weeks after stroke                                                                                                                                                                         |
| Cerebral haemorrhage                        | Cerebral haemorrhage confirmed with CT, MRI or surgery                                                                                                                                                                                                                                                                                                                     |
| Subarachnoid haemorrhage                    | Subarachnoid haemorrhage confirmed with CT, MRI or surgery                                                                                                                                                                                                                                                                                                                 |
| Type not determined                         | >24 hours of associated clinical signs causing increased disability of $\geq 1$ grade on modified Rankin scale, but no brain imaging performed                                                                                                                                                                                                                             |
| <b>Retinal syndromes</b>                    |                                                                                                                                                                                                                                                                                                                                                                            |
| Infarction                                  | Associated clinical symptoms, typical fundus changes and/or vision loss, scotoma on perimetry                                                                                                                                                                                                                                                                              |
| Haemorrhage                                 | Associated clinical symptoms, typical fundus changes and vision loss                                                                                                                                                                                                                                                                                                       |
| <b>Myocardial infarction</b>                |                                                                                                                                                                                                                                                                                                                                                                            |
|                                             | The assessment includes: chest pain >30 minutes, elevated cardiac enzymes, characteristic ECG-changes                                                                                                                                                                                                                                                                      |
| STEMI                                       | Acute chest pain with persistent (>20 minutes) ST-elevation                                                                                                                                                                                                                                                                                                                |
| NSTEMI                                      | Acute chest pain without ST-elevation, with elevated troponin                                                                                                                                                                                                                                                                                                              |
| Intervention-related myocardial infarction  | New Q wave and elevated troponin <7 days after any intervention (for PCI >3x, for CABG >5x)                                                                                                                                                                                                                                                                                |
| Probable myocardial infarction              | Typical pain, persistent STT-changes, no documented course of cardiac enzymes                                                                                                                                                                                                                                                                                              |
| <b>Heart failure</b>                        |                                                                                                                                                                                                                                                                                                                                                                            |
|                                             | $\geq 2$ of the following: dyspnoea, dyspnoea on exertion, paroxysmal nocturnal dyspnoea, orthopnoea, exercise intolerance, pulmonary oedema, increased central venous pressure, third heart tone, hepatojugular reflux, altered hemodynamics, peripheral oedema, cardiomegaly; and (intensified) treatment with loop diuretics or intravenous vasoactive inotropic agents |
|                                             | Classified as: systolic heart failure (at least moderate left ventricle dysfunction or LVEF <40%) or heart failure with preserved ejection fraction, due to coronary disease, valve disease or other causes                                                                                                                                                                |
| <b>Rupture of abdominal aortic aneurysm</b> |                                                                                                                                                                                                                                                                                                                                                                            |
|                                             | Rupture abdominal aortic aneurysm, proven by ultrasound, CT or laparotomy                                                                                                                                                                                                                                                                                                  |
| <b>Renal disease</b>                        |                                                                                                                                                                                                                                                                                                                                                                            |
| End-stage renal disease                     | CKD stage 5 (i.e. persisting eGFR <15ml/min/1.73 m <sup>2</sup> for >3 months and/or need for renal replacement therapy (chronic dialysis or renal transplantation))                                                                                                                                                                                                       |



|                                                                 |                                                                                                                                                                                                                                                                                                                                                                                                                                                                                                                                                                                                                                                                       |
|-----------------------------------------------------------------|-----------------------------------------------------------------------------------------------------------------------------------------------------------------------------------------------------------------------------------------------------------------------------------------------------------------------------------------------------------------------------------------------------------------------------------------------------------------------------------------------------------------------------------------------------------------------------------------------------------------------------------------------------------------------|
| Acute renal insufficiency – temporary renal replacement therapy | Acute kidney injury requiring temporary renal replacement therapy                                                                                                                                                                                                                                                                                                                                                                                                                                                                                                                                                                                                     |
| Acute renal insufficiency – no renal replacement therapy        | Acute kidney injury KDIGO stage 3 (i.e. serum creatinine 3 times baseline creatinine and/or serum creatinine $\geq 354$ $\mu\text{mol/L}$ )                                                                                                                                                                                                                                                                                                                                                                                                                                                                                                                           |
| <b>Bleeding</b>                                                 | Bleeding requiring outpatient treatment or (prolonged) hospitalization                                                                                                                                                                                                                                                                                                                                                                                                                                                                                                                                                                                                |
| Major bleeding                                                  | <i>ISTH definition:</i> fatal bleeding and/or bleeding in critical area or organ (such as intracranial, intraspinal, intraocular, retroperitoneal, intra-articular, pericardial, intramuscular causing compartment syndrome), bleeding causing Hb level drop of $\geq 1.24$ mmol/L or leading to transfusion of $\geq 2$ units of blood <sup>4</sup><br><br><i>BARC type 3:</i> overt bleeding with Hb level drop of $\geq 1.86$ mmol/L, leading to transfusion, cardiac tamponade, surgical intervention for control or intravenous vasoactive agents, or located intracranial or intraocular compromising vision<br><i>BARC type 5:</i> fatal bleeding <sup>5</sup> |
| <b>Diabetes</b>                                                 | Self-reported diagnosis, confirmed and classified based on a questionnaire. If necessary, additional information is requested from the general practitioner or looked up in the electronic health record.                                                                                                                                                                                                                                                                                                                                                                                                                                                             |
| DM type 1                                                       | Insulin needed immediately at onset and absence of oral glucose lowering medication. Supportive but not mandatory: $\leq 25$ years of age, BMI $< 25$ kg/m <sup>2</sup> , presence of anti-GAD antibodies                                                                                                                                                                                                                                                                                                                                                                                                                                                             |
| DM type 2                                                       | Diagnosed between age 35 and 40 and BMI $> 33$ kg/m <sup>2</sup> or diagnosed after age 40 and BMI $> 27$ kg/m <sup>2</sup>                                                                                                                                                                                                                                                                                                                                                                                                                                                                                                                                           |
| <b>Dementia</b>                                                 | Self-reported diagnosis, confirmed and classified based on a questionnaire. Classified as: Alzheimer's disease; vascular dementia; a mix of Alzheimer's disease and vascular dementia; Lewy Body dementia; or frontotemporal dementia.                                                                                                                                                                                                                                                                                                                                                                                                                                |
| <b>Vascular mortality</b>                                       |                                                                                                                                                                                                                                                                                                                                                                                                                                                                                                                                                                                                                                                                       |
| Fatal cerebral infarction                                       | Cerebral infarction leading to Rankin score 4 or 5 followed by death (reasonably plausible that patient would not have died without infarction)                                                                                                                                                                                                                                                                                                                                                                                                                                                                                                                       |
| Fatal cerebral haemorrhage                                      | Cerebral haemorrhage leading to Rankin score 4 or 5 followed by death (reasonably plausible that patient would not have died without infarction)                                                                                                                                                                                                                                                                                                                                                                                                                                                                                                                      |
| Fatal stroke - type not determined                              | Stroke without radiological confirmation leading to Rankin score 4 or 5 followed by death (reasonably plausible that patient would not have died without stroke)                                                                                                                                                                                                                                                                                                                                                                                                                                                                                                      |
| Fatal myocardial infarction                                     | Documented myocardial infarction followed by death ( $> 1$ hour after onset of symptoms)                                                                                                                                                                                                                                                                                                                                                                                                                                                                                                                                                                              |

|                                                          |                                                                                                                                                                                                                                                                                                                                                                                                                               |
|----------------------------------------------------------|-------------------------------------------------------------------------------------------------------------------------------------------------------------------------------------------------------------------------------------------------------------------------------------------------------------------------------------------------------------------------------------------------------------------------------|
| Fatal heart failure                                      | Heart failure leading to death                                                                                                                                                                                                                                                                                                                                                                                                |
| Fatal rupture abdominal aortic aneurysm                  | Rupture abdominal aortic aneurysm followed by death                                                                                                                                                                                                                                                                                                                                                                           |
| Fatal bleeding                                           | Major bleeding leading to death                                                                                                                                                                                                                                                                                                                                                                                               |
| Sudden death                                             | Witnessed death occurring within 1 hour after onset of symptoms, or within 24 hours given convincing circumstantial evidence                                                                                                                                                                                                                                                                                                  |
| Other                                                    | Death without apparent cause in case of cardiovascular history, terminal renal insufficiency, dementia (unless clearly non-vascular), pulmonary haemorrhage*                                                                                                                                                                                                                                                                  |
| <b>Non-vascular mortality</b>                            | Death caused by malignancy, infection, unnatural death or other                                                                                                                                                                                                                                                                                                                                                               |
| <b>All-cause mortality</b>                               | Death from any cause                                                                                                                                                                                                                                                                                                                                                                                                          |
|                                                          | <b>Secondary endpoints</b>                                                                                                                                                                                                                                                                                                                                                                                                    |
| <b>Amputation</b>                                        | Any amputation of a toe or part of the foot or leg due to chronic ischemia. <i>Excluding:</i> traumatic amputations, amputation due to sepsis, amputation of fingers.                                                                                                                                                                                                                                                         |
| <b>Vascular intervention†</b>                            | Percutaneous coronary intervention; coronary artery bypass grafting; carotid endarterectomy, angioplasty or stenting; vertebral artery angioplasty or stenting; vascular surgery or percutaneous transluminal angioplasty of the aorta(bifurcation), iliac arteries, femoral and crural arteries; vascular intervention because of abdominal angina; LVAD. Angioplasty and stenting of other arteries are registered as well. |
| <b>Vascular intervention of an intracranial aneurysm</b> | Coiling or clipping of an intracranial aneurysm                                                                                                                                                                                                                                                                                                                                                                               |

\* In accordance with Antiplatelets Trialists' Collaboration, Lancet 2002

† Excluding interventions already planned before or at inclusion, but including re-interventions and complications of an intervention already planned before or at inclusion.

Anti-GAD, antibodies to glutamic acid decarboxylase; BARC; Bleeding Academic Research Consortium; BMI, body mass index; CABG, coronary artery bypass grafting; CKD, chronic kidney disease; CT, computed tomography; ECG, electrocardiogram; eGFR, estimated glomerular filtration rate; Hb, haemoglobin; KDIGO, Kidney Disease Improving Global Outcomes; LVAD, left ventricular assist device; LVEF, left ventricular ejection fraction; MRI, magnetic resonance imaging; NSTEMI, non-ST-elevation myocardial infarction; PCI, percutaneous coronary intervention; STEMI, ST-elevation myocardial infarction

Supplementary Table 6. Substudies of UCC-SMART

| Substudy                                                                                                    | Period in which the patients were included | N                                                       | Aim                                                                                                                                                                                                                                                                | Key publications                                                                                                            | Additional measurements within substudy                                                                                                                                                                                                                                                                          |
|-------------------------------------------------------------------------------------------------------------|--------------------------------------------|---------------------------------------------------------|--------------------------------------------------------------------------------------------------------------------------------------------------------------------------------------------------------------------------------------------------------------------|-----------------------------------------------------------------------------------------------------------------------------|------------------------------------------------------------------------------------------------------------------------------------------------------------------------------------------------------------------------------------------------------------------------------------------------------------------|
| <b>ARTEMIS</b><br>( <i>ARTE</i> rial calcifications of the <i>Media</i> and <i>Intima</i> in <i>SMART</i> ) | 2015 - 2017                                | 520                                                     | 1) To determine whether intima and media calcification differ in their respective associated CVD risks. 2) To elucidate which risk factors and mechanisms lead to the development of these respective types of calcification and in turn to cardiovascular disease | - Zwakenberg, 2020, PloS One <sup>6</sup><br>- Hoek, 2021, Atherosclerosis <sup>7</sup>                                     | <u>Technique</u> : unenhanced thin-slice CT-scan of the legs (femoral head to feet)<br><u>Measurement</u> : calcification in the femoral and crural arteries scored as absent, predominant intimal arterial calcification, predominant medial arterial calcification or indistinguishable; calcification volume. |
| <b>Athero-Express</b><br><i>Added to UCC-SMART study in June 2022</i>                                       | 2002 - present                             | Patients undergoing a femoral or carotid endarterectomy | To investigate the value of plaque characteristics in relation to cardiovascular outcomes                                                                                                                                                                          | Verhoeven, 2004, Eur J Epidemiology <sup>8</sup>                                                                            | During surgery, the atherosclerotic plaque is collected and immunohistochemically stained in order to assess fat, collagen, macrophages and smooth muscle cells                                                                                                                                                  |
| <b>BEST</b><br>( <i>BEtter risk factor treatment with STructured agreement</i> )<br>RCT                     | 2004 - 2006                                | 197 patients with at least 2 modifiable risk factors    | To investigate whether a clearly written agreement on risk factor management between general practitioners and hospital improved the vascular risk profile of high-risk patients compared with usual care after 1 year                                             | Brouwer, B.G. 2008. SMART risk factor screening in patients at high vascular risk. Utrecht University, Utrecht <sup>9</sup> | NA                                                                                                                                                                                                                                                                                                               |
| <b>Brown adipose tissue</b>                                                                                 | 2014 – 2016                                | 50 patients with clinically manifest CVD                | 1) To evaluate and optimize a protocol for quantifying brown adipose tissue with MRI and to assess BAT volume per patient. 2) To evaluate the reproducibility of MRI by determining inter-scan, intra-observer and inter-observer variability in BAT volume        | - Franssens, 2016, NMR Biomed <sup>10</sup><br>- Franssens, 2017, J Magn. Reson. Imaging <sup>11</sup>                      | <u>Technique</u> : 1.5T water-fat MRI of supraclavicular and subcutaneous adipose tissue<br><u>Measurement</u> : fat signal fraction value, representative of the amount of triglycerides, intracellular water content and capillary                                                                             |

|                                                                                                         |             |                                                                                                                                                                         |                                                                                                                                                                                                                                                                                                                                                                                                                                                                                                  |                                                                                                 |                                                                                                                                                                                                                                                                                                                                                                                                                            |
|---------------------------------------------------------------------------------------------------------|-------------|-------------------------------------------------------------------------------------------------------------------------------------------------------------------------|--------------------------------------------------------------------------------------------------------------------------------------------------------------------------------------------------------------------------------------------------------------------------------------------------------------------------------------------------------------------------------------------------------------------------------------------------------------------------------------------------|-------------------------------------------------------------------------------------------------|----------------------------------------------------------------------------------------------------------------------------------------------------------------------------------------------------------------------------------------------------------------------------------------------------------------------------------------------------------------------------------------------------------------------------|
|                                                                                                         |             |                                                                                                                                                                         |                                                                                                                                                                                                                                                                                                                                                                                                                                                                                                  |                                                                                                 | density, of supraclavicular and subcutaneous adipose tissue                                                                                                                                                                                                                                                                                                                                                                |
| <b>DISH</b><br><i>(Diffuse idiopathic skeletal hyperostosis)</i>                                        | 1996 – 2018 | 4,791 (all patients from SMART with chest X-ray within 3 months of inclusion)                                                                                           | N.A.                                                                                                                                                                                                                                                                                                                                                                                                                                                                                             | - Harlianto, 2021, Rheumatology <sup>12</sup><br>- Harlianto, 2021, J. Pers. Med. <sup>13</sup> | <i>Technique: Chest X-ray within three months of inclusions (if available in routine clinical care)</i>                                                                                                                                                                                                                                                                                                                    |
|                                                                                                         |             |                                                                                                                                                                         |                                                                                                                                                                                                                                                                                                                                                                                                                                                                                                  |                                                                                                 | <u>Measurement:</u> X-rays were scored for DISH using the Resnick criteria. <sup>14</sup> DISH is classified following the presence of ossification of at least four contiguous vertebrae; (relative) preservation of the intervertebral disc height; and the absence of apophyseal joint bony ankylosis or sacroiliac joint erosion. Thoracic aortic calcification subjective score as absent, mild, moderate and severe. |
| <b>IRIS</b><br><i>(Internet-based vascular Risk factor Intervention and Self-management)</i><br><br>RCT | 2008 - 2010 | 330 patients with a recent clinical manifestation of atherosclerosis of CAD, CeVD or PAD and with ≥ 2 treatable risk factors not at goal (from UMC Utrecht + Rijnstate) | 1) To evaluate whether an internet-based vascular risk factor management program promoting self-efficacy on top of usual care is more effective than usual care alone in reducing vascular risk factors in patients with a recent clinical manifestation of a vascular disease.<br>2) To evaluate whether an internet-based vascular risk factor management program for reducing vascular risk factors in patients with a recent clinical manifestation of a vascular disease is cost-effective. | - Vernooij, 2012, BMJ <sup>15</sup><br>- Greving, 2015, BMJ Open <sup>16</sup>                  | NA                                                                                                                                                                                                                                                                                                                                                                                                                         |

|                                                                                                                                                   |                |                                                                                                                                              |                                                                                                                                                                                                                                                                      |                                                                                                                                                          |                                                                                                                                                                                                                       |
|---------------------------------------------------------------------------------------------------------------------------------------------------|----------------|----------------------------------------------------------------------------------------------------------------------------------------------|----------------------------------------------------------------------------------------------------------------------------------------------------------------------------------------------------------------------------------------------------------------------|----------------------------------------------------------------------------------------------------------------------------------------------------------|-----------------------------------------------------------------------------------------------------------------------------------------------------------------------------------------------------------------------|
| <p><b>RULE</b><br/>(<i>Risk management in Utrecht and Leiden Evaluation study</i>)</p> <p>Two-centre parallel-group comparative investigation</p> | 2005 - 2007    | 604 patients with CAD, CeVD, PAD or T2DM from UMC Utrecht (+ 566 patients from LUMC)                                                         | To assess risk factor status after referral in patients with established vascular disease or type 2 diabetes who took part in the multidisciplinary hospital-based vascular screening program SMART, compared with a group who did not participate in such a program | Brouwer, 2010, J of Int Med <sup>17</sup>                                                                                                                | NA                                                                                                                                                                                                                    |
| <p><b>Small aneurysms trial (AAA)</b></p>                                                                                                         | 1996 - 2005    | 230 patients with an initial AAA diameter of 30-55mm, who were examined by $\geq 2$ AAA diameter measurements and with $\geq 6$ months of FU | To estimate overall rupture rates of small AAAs and to investigate a predefined set of demographic characteristics and cardiovascular risk factors for association with AAA growth                                                                                   | Schlosser, 2008, J Vasc Surg <sup>18</sup>                                                                                                               | <p><u>Technique:</u> Ultrasound scanning of the aorta</p> <p><u>Measurement:</u> AAA diameter and change with initial AAA diameter</p>                                                                                |
| <p><b>SMART-2</b></p>                                                                                                                             | 2007 - present | 1794 patients with a history of CVD or diabetes, a median of 9.9 years after inclusion in UCC-SMART                                          | To study the course of atherosclerosis and vascular risk factors over time, and to evaluate the effects of treatment in the past                                                                                                                                     |                                                                                                                                                          | NA                                                                                                                                                                                                                    |
| <p><b>SMART HEART</b></p>                                                                                                                         | 1996 - 2006    | 536 patients with $\geq 3$ years hypertension, but free of known coronary or                                                                 | To detect patient characteristics related to the development of LVH with special focus on the detection of SNPs that confer an increased susceptibility for the development of LVH, and thus, heart failure                                                          | <p>- Meijs, 2007, Neth Heart J<sup>19</sup></p> <p>- Meijs, 2009, Eur J Prev Cardiol<sup>20</sup></p> <p>- Vernooij, 2012, Am J Cardiol<sup>21</sup></p> | <p><u>Technique:</u> 1.5T cardiac MRI and delayed-enhancement cardiac MRI</p> <p><u>Measurement:</u> LV mass, LV-end diastolic and end-systolic volumes and left atrial volumes; areas of hyperintense myocardium</p> |

|                                                           |                                                                                                 |                                                 |                                                                                                                                                                                                                                                                                                                  |                                                                                                                                                                                                                                                                                      |                                                                                                                                                                                                                                                                                                                       |
|-----------------------------------------------------------|-------------------------------------------------------------------------------------------------|-------------------------------------------------|------------------------------------------------------------------------------------------------------------------------------------------------------------------------------------------------------------------------------------------------------------------------------------------------------------------|--------------------------------------------------------------------------------------------------------------------------------------------------------------------------------------------------------------------------------------------------------------------------------------|-----------------------------------------------------------------------------------------------------------------------------------------------------------------------------------------------------------------------------------------------------------------------------------------------------------------------|
|                                                           |                                                                                                 | valvular disease                                |                                                                                                                                                                                                                                                                                                                  | - De Beus, 2015, Eur J Clin Invest <sup>22</sup>                                                                                                                                                                                                                                     | classified as myocardial scar tissue (used to assess the presence of unrecognized myocardial infarction). Infarct size was quantified as scar mass relative to LV mass.                                                                                                                                               |
| <b>SMART Inform</b><br>Three-armed hypothesis-blinded RCT | 2017 - 2018                                                                                     | 303 patients with stable CVD and using a statin | To determine whether communicating personalized statin therapy-effects obtained by prognostic algorithm leads to lower decisional conflict associated with statin use in patients with stable CVD compared with standard (non-personalized) therapy-effects                                                      | Jaspers, 2021, BMJ Open <sup>23</sup>                                                                                                                                                                                                                                                | NA                                                                                                                                                                                                                                                                                                                    |
| <b>SMART-Junior</b>                                       | Questionnaires sent between 2009-2013 to patients who were included between 2001 and 2012       | 4,270 (10,564 children)                         | 1) To investigate the presence of cardiovascular risk factors and vascular disease in offspring of patients participating in the SMART cohort. 2) To identify a risk profile of the parent prognostic for the development of traditional cardiovascular risk factors or cardiovascular events in their children. | - Weijmans, 2015, Int J Cardiol <sup>24</sup><br>- Weijmans, 2015, Am Heart J <sup>25</sup>                                                                                                                                                                                          | - Questions about CV risk factors (incl. dates of risk factor diagnoses): presence of diabetes, hypertension, hypercholesterolemia, smoking behaviour and present weight of the offspring<br>- Questions about CVD (incl. dates of occurrence): whether offspring had experienced MI, PCI, CABG, stroke, PAD, or AAA. |
| <b>SMART-MR and SMART Medea</b>                           | 2001 - 2005<br><br>1 <sup>st</sup> follow-up: 2006-2009<br>2 <sup>nd</sup> follow-up: 2013-2017 | 1,309                                           | To investigate brain changes using 1.5T MRI in patients with symptomatic atherosclerotic disease (and 7T MRI in follow-up from 2013-2017)                                                                                                                                                                        | - Geerlings, 2010, Atherosclerosis <sup>26</sup><br>- Muller, 2011, Ann Neurol <sup>27</sup><br>- Conijn, 2011, Stroke <sup>28</sup><br>- Kloppenborg, 2012, Neurology <sup>29</sup><br>- Jochemsen 2013, JAMA Neurology <sup>30</sup><br>- Van der Veen, 2015, Stroke <sup>31</sup> | <u>Technique:</u><br>- 1.5T brain MRI<br>- 7T brain MRI<br><br><u>Measurement:</u><br>- Total cerebral blood flow (mL/min per 100 mL brain parenchymal volume)<br>- White matter lesions: volume (mL), shape (using the concavity index and fractal dimension <sup>35</sup> ) and location were scored                |

|                                                                                                                                  |                       |                                                                                        |                                                                                                                                                                                                                                            |                                                                                                                                                                         |                                                                                                                                                                                                                                                                                                                                                                                                                                                                                                                                                                                                                                                                                                                                                                                                                                                                                                                                                                                                                                                                                                                                                                                                                                                                                               |
|----------------------------------------------------------------------------------------------------------------------------------|-----------------------|----------------------------------------------------------------------------------------|--------------------------------------------------------------------------------------------------------------------------------------------------------------------------------------------------------------------------------------------|-------------------------------------------------------------------------------------------------------------------------------------------------------------------------|-----------------------------------------------------------------------------------------------------------------------------------------------------------------------------------------------------------------------------------------------------------------------------------------------------------------------------------------------------------------------------------------------------------------------------------------------------------------------------------------------------------------------------------------------------------------------------------------------------------------------------------------------------------------------------------------------------------------------------------------------------------------------------------------------------------------------------------------------------------------------------------------------------------------------------------------------------------------------------------------------------------------------------------------------------------------------------------------------------------------------------------------------------------------------------------------------------------------------------------------------------------------------------------------------|
|                                                                                                                                  |                       |                                                                                        |                                                                                                                                                                                                                                            | <p>- Zwartbol, 2019, Stroke<sup>32</sup><br/>                 - Ghaznawi 2021, Neurology<sup>33</sup><br/>                 - Rissanen, 2021, Neurology<sup>34</sup></p> | <p>- Brain parenchymal fraction (% of intracranial volume (ICV) that is occupied by brain tissue), an indicator for global brain atrophy<br/>                 - Ventricular enlargement (% of ventricular volume of the total ICV), an indicator for subcortical brain atrophy<br/>                 - Cortical gray matter fraction (% cortical gray matter volume of the total ICV), an indicator of cortical brain atrophy<br/>                 - Infarcts: location, affected flow territory and type were scored</p> <p><u>Neuropsychological assessment (from 2003):</u><br/>                 - 15-learning word test<sup>36</sup><br/>                 - Rey-Osterrieth Complex Figure test<sup>37</sup><br/>                 - Visual Elevator test<sup>38</sup><br/>                 - Brixton Spatial Anticipation test<sup>39</sup><br/>                 - Verbal Fluency test (letter)<sup>40</sup><br/>                 - Dutch version of the National Adult Reading test<sup>41</sup></p> <p><u>From 2006:</u><br/>                 - MMSE<sup>42</sup><br/>                 - Verbal Fluency test (animals)<sup>40</sup><br/>                 - Digit Symbol Substitution Test<sup>43</sup><br/>                 - Forward Digit Span and Backward Digit Span<sup>44</sup></p> |
| <p><b>SMART-ORACLE</b><br/> <i>(Optimizing Risk Assessment with CT-angiography or Calcium score in patients at high risk</i></p> | <p>2012 - present</p> | <p>1.182 (until Dec 2021; ongoing) patients with a history of symptomatic vascular</p> | <p>1) To determine whether there is additional value of performing CAC score, CTCA, total aorta calcification, burden as compared to traditional risk factors in the risk stratification in predicting any cardiovascular event. 2) To</p> | <p>- Franssens, 2017, Eur J of Prev Cardiol<sup>45</sup><br/>                 - Van 't Klooster, 2020, IJC Heart &amp; Vasculature<sup>46</sup></p>                     | <p><u>Technique:</u> Cardiac non-contrast enhanced CT and CTA of the heart and the carotids to the circle of Willis</p>                                                                                                                                                                                                                                                                                                                                                                                                                                                                                                                                                                                                                                                                                                                                                                                                                                                                                                                                                                                                                                                                                                                                                                       |

|                                                                                                                                         |                                                         |                                                                                                                                                                  |                                                                                                                                                                                                                                                                                                                                                                                                                                |                                                                                                   |                                                                                                                                                                                                                                                                                                                                                                                |
|-----------------------------------------------------------------------------------------------------------------------------------------|---------------------------------------------------------|------------------------------------------------------------------------------------------------------------------------------------------------------------------|--------------------------------------------------------------------------------------------------------------------------------------------------------------------------------------------------------------------------------------------------------------------------------------------------------------------------------------------------------------------------------------------------------------------------------|---------------------------------------------------------------------------------------------------|--------------------------------------------------------------------------------------------------------------------------------------------------------------------------------------------------------------------------------------------------------------------------------------------------------------------------------------------------------------------------------|
| <i>for a cardiovascular event)</i>                                                                                                      |                                                         | disease, T2DM or hypertension                                                                                                                                    | estimate the additional value of CTCA and CAC score on top of traditional risk factors in predicting cardiac events. 3) To determine the value of soft plaque burden in the carotid and coronary arteries in predicting acute vascular events                                                                                                                                                                                  |                                                                                                   | <u>Measurement:</u><br>- Radiodensity and volume of epicardial adipose tissue<br>- Coronary artery calcium (scored using the Agatston method <sup>47</sup> )<br>- Calcifications on heart valves and in the thoracic aorta (quantified using a pseudo-mass score: mean calcium hounsfield units × region of interest volume)<br>- CAD-RADS <sup>48</sup><br>- Carotid stenosis |
| <b>SPAIN</b><br><i>(Selfmanagement of vascular Patients Activated by Internet and Nurses)</i>                                           | 2005                                                    | 50 patients with computer facilities                                                                                                                             | 1) To evaluate the feasibility of an Internet-based vascular risk reduction program in terms of accessibility, frequency and pattern of use of an individualized website for patients with a recent clinical manifestation of arterial disease. 2) To evaluate whether the use was related to a change in vascular risk factors after 6 months                                                                                 | Goessens, 2008, Patient education and counseling <sup>49</sup>                                    | NA                                                                                                                                                                                                                                                                                                                                                                             |
| <b>TEMPUS</b><br><i>(The Evening versus Morning Polypill Utilization Study)</i><br><br>Randomized open blinded endpoint crossover trial | 1996 - 2009. Patients were screened between 2012 - 2013 | 78 patients with established CVD or those at intermediate to high risk of CVD with indication for the use of cardiovascular medication, according to the current | 1) To assess whether there is a difference in the morning or evening administration of a cardiovascular polypill, an FDC formulation containing aspirin, simvastatin, lisinopril and hydrochlorothiazide, on LDL-C and mean 24-hour systolic BP levels in individuals at high risk of cardiovascular disease. 2) To assess the effect of the polypill on LDL-C, ambulatory BP, anti-platelet function, adherence and patients' | - Lafeber, 2014, Eur J Prev Cardiol <sup>50</sup><br>- Lafeber, 2014, Int J Cardiol <sup>51</sup> | At baseline and at the end of each treatment period: medical history, anthropometric parameters, laboratory blood tests, office BP, 24-hour ambulatory BP monitoring, platelet function, pulse wave analysis, adherence to therapy, and questionnaires                                                                                                                         |



|                                                                         |                                                     |                                                    |                                                                                                                                                                                                        |                                                                                                           |                                                                                                                                                                                                                                                                                                                                         |
|-------------------------------------------------------------------------|-----------------------------------------------------|----------------------------------------------------|--------------------------------------------------------------------------------------------------------------------------------------------------------------------------------------------------------|-----------------------------------------------------------------------------------------------------------|-----------------------------------------------------------------------------------------------------------------------------------------------------------------------------------------------------------------------------------------------------------------------------------------------------------------------------------------|
|                                                                         |                                                     | Dutch guidelines                                   | preference as compared to the administration of the individual, identically dosed components of the polypill administered at different times of the day, as is currently recommended in clinical care. |                                                                                                           |                                                                                                                                                                                                                                                                                                                                         |
| <b>VENUS</b><br><i>(Vascular prEvention by Nurses Study)</i><br><br>RCT | Patients included between May 2002 and October 2003 | 236 patients with $\geq 2$ modifiable risk factors | To investigate whether risk factor management in the hospital improved with nurse practitioner care plus usual care compared with usual care                                                           | - Goessens, 2006, Eur J Cardiovasc Prev Rehabil <sup>52</sup><br>- Sol, 2009, Eur J C Nurse <sup>53</sup> | Questionnaire about social support using a social support questionnaire for Dutch CHD patients:<br>- Structural support: whether they have a spouse and whether they have someone they could turn to about their health problems<br>- Functional support: statements about active involvement, protective buffering and overprotection. |

AAA, aortic abdominal aneurysm; BAT, brown adipose tissue; BP, blood pressure; CABG, coronary artery bypass grafting; CAC, coronary artery calcium; CAD, coronary artery disease, CAD-RADS, CAD-reporting and data system, CeVD, cerebrovascular disease; CHD, coronary heart disease; CT, computed tomography; CTA, CT angiography; CTCA, CT coronary angiography; CV, cardiovascular; CVD, cardiovascular disease; DISH, diffuse idiopathic skeletal hyperostosis; FDC, fixed dose combination; FU, follow-up; LDL-c, low-density lipoprotein cholesterol; LUMC, Leiden University Medical Center; LV, left ventricle; LVH, left ventricle hypertrophy; MI, myocardial infarction; MRI, magnetic resonance imaging; NA, not applicable; PAD, peripheral artery disease; PCI, percutaneous coronary intervention; RCT, randomized controlled trial; SMART, Second Manifestations of Arterial Disease; SNP; single nucleotide polymorphism; T2DM, type 2 diabetes mellitus; UCC-SMART, Utrecht Cardiovascular Cohort-SMART; UMC, University Medical Center

**Supplementary Table 7. Baseline characteristics of participants with complete follow-up and participants without complete follow-up**

|                                      | <b>Participants with complete follow-up (n = 13,284)</b> | <b>Participants without complete follow-up (n = 1,546)</b> |
|--------------------------------------|----------------------------------------------------------|------------------------------------------------------------|
| Age (years)                          | 57 ± 12                                                  | 55 ± 14                                                    |
| Male sex                             | 8,736 (66)                                               | 894 (57)                                                   |
| Previous or current smoking          | 9,285 (70)                                               | 1,065 (69)                                                 |
| Established cardiovascular disease   | 8,270 (65)                                               | 913 (59)                                                   |
| Diabetes mellitus                    | 2,272 (17)                                               | 336 (22)                                                   |
| Lipid-lowering therapy               | 7,529 (57)                                               | 724 (47)                                                   |
| Antihypertensive therapy             | 9,053 (68)                                               | 977 (63)                                                   |
| Oral anticoagulant therapy           | 1,145 (9)                                                | 121 (8)                                                    |
| Systolic blood pressure (mmHg)       | 140 ± 22                                                 | 144 ± 23                                                   |
| Diastolic blood pressure (mmHg)      | 83 ± 13                                                  | 84 ± 13                                                    |
| Body mass index (kg/m <sup>2</sup> ) | 26.9 ± 4.4                                               | 27.1 ± 4.8                                                 |
| Non-HDL-cholesterol (mmol/L)         | 3.8 ± 1.3                                                | 4.0 ± 1.5                                                  |
| eGFR (ml/min/1.73 m <sup>2</sup> )   | 53 ± 41                                                  | 48 ± 43                                                    |
| HbA1c (mmol/mol)                     | 38 (36 - 42)                                             | 40 (36 - 48)                                               |
| CRP (mg/L)                           | 2.0 (1.0 - 4.3)                                          | 2.2 (1.0 - 4.4)                                            |

Data are presented as number (percentage), mean ± standard difference or median (interquartile range).

Supplemental Figure 1. Timeline of substudies of UCC-SMART



1.5T brain MRIs have been performed between 2001 and 2005. Follow-up of 1.5T MRI was performed between 2006 and 2009 and from 2013 to 2017. During the second follow-up, a 7T brain MRI was added in a subsample. A detailed overview of the substudies is provided in Supplementary Table 5.

ARTEMIS, ARTERial calcifications of the Media and Intima in SMART (Second Manifestations of Arterial Disease)<sup>6</sup>; BEST, BETter risk factor treatment with STructured agreement<sup>9</sup>; Brown Adipose Tissue<sup>10</sup>; DISH, Diffuse idiopathic skeletal hyperostosis<sup>12</sup>; IRIS, Internet-based vascular Risk factor Intervention and Self-management<sup>15</sup>; RULE, Risk management in Utrecht and Leiden Evaluation study<sup>17</sup>; SMART HEART<sup>19</sup>; SMART Inform<sup>23</sup>; SMART-JUNIOR<sup>24</sup>; SMART-MR<sup>26</sup>; ORACLE; Optimizing Risk Assessment with CT-angiography or Calcium score in patients at high risk for a cardiovascular event<sup>45</sup>; SPAIN,

1  
2  
3  
4  
5  
6  
7  
8  
9  
10  
11  
12  
13  
14  
15  
16  
17  
18  
19  
20  
21  
22  
23  
24  
25  
26  
27  
28  
29  
30  
31  
32  
33  
34  
35  
36  
37  
38  
39  
40  
41  
42  
43  
44  
45  
46

Self-management of vascular Patients Activated by Internet and Nurses<sup>49</sup>; TEMPUS, The Evening versus Morning Polypill Utilization Study<sup>50</sup>; VENUS, Vascular prEvention by NURses Study<sup>52</sup>.

For peer review only

## References

1. van Swieten JC, Koudstaal PJ, Visser MC, Schouten HJ, van Gijn J. Interobserver agreement for the assessment of handicap in stroke patients. *Stroke*. 1988 May;19(5):604–7.
2. Brown MA, Magee LA, Kenny LC, Karumanchi SA, McCarthy FP, Saito S, et al. Hypertensive Disorders of Pregnancy. *Hypertension*. 2018 Jul;72(1):24–43.
3. Ware JEJ, Sherbourne CD. The MOS 36-item short-form health survey (SF-36). I. Conceptual framework and item selection. *Med Care*. 1992 Jun;30(6):473–83.
4. Schulman S, Kearon C. Definition of major bleeding in clinical investigations of antihemostatic medicinal products in non-surgical patients. *J Thromb Haemost*. 2005 Apr 4;3(4):692–4.
5. Mehran R, Rao S V, Bhatt DL, Gibson CM, Caixeta A, Eikelboom J, et al. Standardized bleeding definitions for cardiovascular clinical trials: a consensus report from the Bleeding Academic Research Consortium. *Circulation*. 2011 Jun;123(23):2736–47.
6. Zwakenberg SR, De Jong PA, Hendriks EJ, Westerink J, Spiering W, De Borst GJ, et al. Intimal and medial calcification in relation to cardiovascular risk factors. *PLoS One*. 2020;15(7 July):1–14.
7. Hoek AG, Zwakenberg SR, Elders PJM, de Jong PA, Spiering W, Bartstra JW, et al. An elevated ankle-brachial index is not a valid proxy for peripheral medial arterial calcification. *Atherosclerosis*. 2021;323(March):13–9.
8. Verhoeven BAN, Velema E, Schoneveld AH, de Vries JPPM, de Bruin P, Seldenrijk CA, et al. Athero-express: differential atherosclerotic plaque expression of mRNA and protein in relation to cardiovascular events and patient characteristics. Rationale and design. *Eur J Epidemiol*. 2004;19(12):1127–33.
9. Brouwer BG. SMART risk factor screening in patients at high vascular risk [dissertation]. Utrecht University; 2008.
10. Franssens BT, Eikendal AL, Leiner T, van der Graaf Y, Visseren FLJ, Hoogduin JM. Reliability and agreement of adipose tissue fat fraction measurements with water-fat MRI in patients with manifest cardiovascular disease. *NMR Biomed*. 2016;29(1):48–56.
11. Franssens BT, Hoogduin H, Leiner T, van der Graaf Y, Visseren FLJ. Relation between brown adipose tissue and measures of obesity and metabolic dysfunction in patients with cardiovascular disease. *J Magn Reson Imaging*. 2017;46(2):497–504.
12. Harlianto NI, Oosterhof N, Foppen W, Hol ME, Wittenberg R, van der Veen PH, et al. Diffuse idiopathic skeletal hyperostosis is associated with incident stroke in patients with increased cardiovascular risk. *Rheumatology*. 2021;1–8.
13. Harlianto NI, Westerink J, Foppen W, Hol ME, Wittenberg R, Van Der Veen PH, et al. Visceral adipose tissue and different measures of adiposity in different severities of diffuse idiopathic skeletal hyperostosis. *J Pers Med*. 2021;11(7):1–11.
14. Resnick D, Niwayama G. Radiographic and pathologic features of spinal involvement in diffuse idiopathic skeletal hyperostosis (DISH). *Radiology*. 1976 Jun;119(3):559–68.
15. Vernooij WP, Kaasjager HAH, Van Der Graaf Y, Wierdsma J, Grandjean HMH, Hovens MMC, et al. Internet based vascular risk factor management for patients with clinically manifest vascular disease: Randomised controlled trial. *BMJ*. 2012;344(7863):1–13.
16. Greving JP, Kaasjager HAH, Vernooij JWP, Hovens MMC, Wierdsma J, Grandjean HMH, et al. Cost-effectiveness of a nurse-led internet-based vascular risk factor management programme: Economic evaluation alongside a randomised controlled clinical trial. *BMJ Open*. 2015;5(5):1–8.
17. Brouwer BG, Visseren FLJ, Algra A, Van Bockel JH, Bollen ELEM, Doevendans PA, et al. Effectiveness of a hospital-based vascular screening programme (SMART) for risk factor management in patients with established vascular disease or type 2 diabetes: A parallel-group comparative study. *J Intern Med*. 2010;268(1):83–93.
18. Schlösser FJV, Tangelder MJD, Verhagen HJM, van der Heijden GJMG, Muhs BE, van der Graaf Y, et al. Growth predictors and prognosis of small abdominal aortic aneurysms. *J Vasc Surg*. 2008;47(6):1127–33.
19. Meijs MFL, Bots ML, Voncken EJA, Cramer MJM, Melman PG, Velthuis BK, et al. Rationale and design of the SMART Heart study. *Netherlands Hear J*. 2007;15(9):295–8.

- 1
  - 2
  - 3
  - 4
  - 5
  - 6
  - 7
  - 8
  - 9
  - 10
  - 11
  - 12
  - 13
  - 14
  - 15
  - 16
  - 17
  - 18
  - 19
  - 20
  - 21
  - 22
  - 23
  - 24
  - 25
  - 26
  - 27
  - 28
  - 29
  - 30
  - 31
  - 32
  - 33
  - 34
  - 35
  - 36
  - 37
  - 38
  - 39
  - 40
  - 41
  - 42
  - 43
  - 44
  - 45
  - 46
  - 47
  - 48
  - 49
  - 50
  - 51
  - 52
  - 53
  - 54
  - 55
  - 56
  - 57
  - 58
  - 59
  - 60
20. Meijls MF I., Vergouwe Y, Cramer MJ m., Vonken EJA, Velthuis BK, Verton DJ, et al. A prediction model for left ventricular mass in patients at high cardiovascular risk. *Eur J Prev Cardiol.* 2010;17(6):621–7.
21. Vernooij JWP, Cramer MJM, Visseren FLJ, Korndewal MJ, Bots ML, Meijls MFL, et al. Relation between abdominal obesity, insulin resistance and left ventricular hypertrophy diagnosed by electrocardiogram and magnetic resonance imaging in hypertensive patients. *Am J Cardiol.* 2012;110(2):227–33.
22. de Beus E, Meijls MFL, Bots ML, Visseren FLJ, Blankestijn PJ, Algra A, et al. Presence of albuminuria predicts left ventricular mass in patients with chronic systemic arterial hypertension. *Eur J Clin Invest.* 2015;45(6):550–6.
23. Jaspers NEM, Visseren FLJ, Van Der Graaf Y, Smulders YM, Damman OC, Brouwers C, et al. Communicating personalised statin therapy-effects as 10-year CVD-risk or CVD-free life-expectancy: Does it improve decisional conflict? Three-armed, blinded, randomised controlled trial. *BMJ Open.* 2021;11(7):1–8.
24. Weijmans M, Van Der Graaf Y, De Borst GJ, Asselbergs FW, Cramer MJ, Algra A, et al. Prevalence and risk of cardiovascular risk factors and events in offspring of patients at high vascular risk and effect of location of parental vascular disease. *Int J Cardiol.* 2015;195:195–202.
25. Weijmans M, Van Der Graaf Y, De Borst GJ, Asselbergs FW, Cramer MJ, Algra A, et al. The relation between the presence of cardiovascular disease and vascular risk factors in offspring and the occurrence of new vascular events in their parents already at high vascular risk. *Am Heart J.* 2015;170(4):744–752.e2.
26. Geerlings MI, Appelman APA, Vincken KL, Algra A, Witkamp TD, Mali WPTM, et al. Brain volumes and cerebrovascular lesions on MRI in patients with atherosclerotic disease. The SMART-MR study. *Atherosclerosis.* 2010;210(1):130–6.
27. Muller M, Van Der Graaf Y, Algra A, Hendrikse J, Mali WP, Geerlings MI. Carotid atherosclerosis and progression of brain atrophy: The SMART-MR Study. *Ann Neurol.* 2011;70(2):237–44.
28. Conijn MMA, Kloppenborg RP, Algra A, Mali WPTM, Kappelle LJ, Vincken KL, et al. Cerebral small vessel disease and risk of death, ischemic stroke, and cardiac complications in patients with atherosclerotic disease: The second manifestations of arterial disease-magnetic resonance (SMART-MR) study. *Stroke.* 2011;42(11):3105–9.
29. Kloppenborg RP, Geerlings MI, Visseren FL, Mali WPTM, Vermeulen M, Van Der Graaf Y, et al. Homocysteine and progression of generalized small-vessel disease :The SMART-MR study. *Neurology.* 2014;82(9):777–83.
30. Jochemsen HM, Muller M, Visseren FL, Scheltens P, Vincken KL, Mali WP, et al. Blood pressure and progression of brain atrophy the SMART-MR study. *JAMA Neurol.* 2013;70(8):1046–53.
31. Van Der Veen PH, Muller M, Vincken KL, Hendrikse J, Mali WPTM, Van Der Graaf Y, et al. Longitudinal Relationship between Cerebral Small-Vessel Disease and Cerebral Blood Flow. *Stroke.* 2015;46(5):1233–8.
32. Zwartbol MHT, Van Der Kolk AG, Ghaznawi R, Van Der Graaf Y, Hendrikse J, Geerlings MI, et al. Intracranial Vessel Wall Lesions on 7T MRI (Magnetic Resonance Imaging): Occurrence and Vascular Risk Factors: The SMART-MR Study. *Stroke.* 2019;50(1):88–94.
33. Ghaznawi R, Geerlings MI, Jaarsma-Coes M, Hendrikse J, de Bresser J. Association of White Matter Hyperintensity Markers on MRI and Long-term Risk of Mortality and Ischemic Stroke: The SMART-MR Study. *Neurology.* 2021;96(17):e2172–83.
34. Rissanen I, Lucci C, Ghaznawi R, Hendrikse J, Kappelle LJ, Geerlings MI. Association of Ischemic Imaging Phenotype With Progression of Brain Atrophy and Cerebrovascular Lesions on MRI: The SMART-MR Study. *Neurology.* 2021;97(11):e1063–74.
35. Ghaznawi R, Geerlings MI, Jaarsma-Coes MG, Zwartbol MHT, Kuijf HJ, van der Graaf Y, et al. The association between lacunes and white matter hyperintensity features on MRI: The SMART-MR study. *J Cereb Blood Flow Metab.* 2019;39(12):2486–96.
36. Brand N, Jolles J. Learning and Retrieval Rate of Words Presented Auditorily and Visually. *J Gen Psychol.* 1985 Apr 1;112(2):201–10.

- 1
- 2
- 3 37. Osterrieth PA. Le test de copie d'une figure complexe; contribution à l'étude de la perception
- 4 et de la mémoire. [Test of copying a complex figure; contribution to the study of perception
- 5 and memory.]. *Arch Psychol (Geneve)*. 1944;30:206–356.
- 6 38. Robertson IH, Ward T, Ridgeway V, Nimmo-Smith I. The structure of normal human
- 7 attention: The Test of Everyday Attention. *J Int Neuropsychol Soc*. 1996 Nov;2(6):525–34.
- 8 39. Burgess PW, Shallice T. Bizarre responses, rule detection and frontal lobe lesions. *Cortex*.
- 9 1996 Jun;32(2):241–59.
- 10 40. Wilkins AJ, Shallice T, McCarthy R. Frontal lesions and sustained attention.
- 11 *Neuropsychologia*. 1987;25(2):359–65.
- 12 41. Schmand B, Geerlings MI, Jonker C, Lindeboom J. Reading ability as an estimator of
- 13 premorbid intelligence: does it remain stable in emergent dementia? *J Clin Exp Neuropsychol*.
- 14 1998 Feb;20(1):42–51.
- 15 42. Folstein MF, Folstein SE, McHugh PR. "Mini-mental state". A practical method for grading
- 16 the cognitive state of patients for the clinician. *J Psychiatr Res*. 1975 Nov;12(3):189–98.
- 17 43. Lezak MD, Howieson DB, Loring DW, Fischer JS. *Neuropsychological assessment*. Oxford
- 18 University Press, USA; 2004.
- 19 44. Wechsler D. Wechsler adult intelligence scale. *Arch Clin Neuropsychol*. 1955;
- 20 45. Franssens BT, Nathoe HM, Leiner T, Van Der Graaf Y, Visseren FLJ. Relation between
- 21 cardiovascular disease risk factors and epicardial adipose tissue density on cardiac computed
- 22 tomography in patients at high risk of cardiovascular events. *Eur J Prev Cardiol*.
- 23 2017;24(6):660–70.
- 24 46. van 't Klooster CC, Nathoe HM, Hjortnaes J, Bots ML, Isgum I, Lessmann N, et al. Multifocal
- 25 cardiovascular calcification in patients with established cardiovascular disease; prevalence, risk
- 26 factors, and relation with recurrent cardiovascular disease. *IJC Hear Vasc*. 2020;27:100499.
- 27 47. Agatston AS, Janowitz WR, Hildner FJ, Zusmer NR, Viamonte MJ, Detrano R. Quantification
- 28 of coronary artery calcium using ultrafast computed tomography. *J Am Coll Cardiol*. 1990
- 29 Mar;15(4):827–32.
- 30 48. Cury RC, Abbara S, Achenbach S, Agatston A, Berman DS, Budoff MJ, et al. Coronary Artery
- 31 Disease - Reporting and Data System (CAD-RADS): An Expert Consensus Document of
- 32 SCCT, ACR and NASCI: Endorsed by the ACC. *JACC Cardiovasc Imaging*. 2016
- 33 Sep;9(9):1099–113.
- 34 49. Goessens BMB, Visseren FLJ, de Nooijer J, van den Borne HW, Algra A, Wierdsma J, et al. A
- 35 pilot-study to identify the feasibility of an Internet-based coaching programme for changing the
- 36 vascular risk profile of high-risk patients. *Patient Educ Couns*. 2008;73(1):67–72.
- 37 50. Lafeber M, Grobbee DE, Bots ML, Thom S, Webster R, Rodgers A, et al. The Evening versus
- 38 Morning Polypill Utilization Study: The TEMPUS rationale and design. *Eur J Prev Cardiol*.
- 39 2014;21(4):425–33.
- 40 51. Lafeber M, Grobbee DE, Schrover IM, Thom S, Webster R, Rodgers A, et al. Comparison of a
- 41 morning polypill, evening polypill and individual pills on LDL-cholesterol, ambulatory blood
- 42 pressure and adherence in high-risk patients; A randomized crossover trial. *Int J Cardiol*.
- 43 2015;181:193–9.
- 44 52. Goessens BMB, Visseren FLJ, Sol BGM, de Man-Van Ginkel JM, Van Der Graaf Y. A
- 45 randomized, controlled trial for risk factor reduction in patients with symptomatic vascular
- 46 disease: The multidisciplinary Vascular Prevention by Nurses Study (VENUS). *Eur J Prev*
- 47 *Cardiol*. 2006;13(6):996–1003.
- 48 53. Sol BGM, van der Graaf Y, Goessens BMB, Visseren FLJ. Social support and change in
- 49 vascular risk factors in patients with clinical manifestations of vascular diseases. *Eur J*
- 50 *Cardiovasc Nurs* [Internet]. 2009;8(2):137–43. Available from:
- 51 <http://dx.doi.org/10.1016/j.ejcnurse.2008.10.005>
- 52
- 53
- 54
- 55
- 56
- 57
- 58
- 59
- 60

STROBE Statement—Checklist of items that should be included in reports of *cohort studies*

|                           | Item No | Recommendation                                                                                                                                                                                                                                                                                                         | Page No |
|---------------------------|---------|------------------------------------------------------------------------------------------------------------------------------------------------------------------------------------------------------------------------------------------------------------------------------------------------------------------------|---------|
| <b>Title and abstract</b> | 1       | (a) Indicate the study's design with a commonly used term in the title or the abstract<br>(b) Provide in the abstract an informative and balanced summary of what was done and what was found                                                                                                                          | 1+3     |
| <b>Introduction</b>       |         |                                                                                                                                                                                                                                                                                                                        |         |
| Background/rationale      | 2       | Explain the scientific background and rationale for the investigation being reported                                                                                                                                                                                                                                   | 5       |
| Objectives                | 3       | State specific objectives, including any prespecified hypotheses                                                                                                                                                                                                                                                       | 5       |
| <b>Methods</b>            |         |                                                                                                                                                                                                                                                                                                                        |         |
| Study design              | 4       | Present key elements of study design early in the paper                                                                                                                                                                                                                                                                | 5+6     |
| Setting                   | 5       | Describe the setting, locations, and relevant dates, including periods of recruitment, exposure, follow-up, and data collection                                                                                                                                                                                        | 6       |
| Participants              | 6       | (a) Give the eligibility criteria, and the sources and methods of selection of participants. Describe methods of follow-up<br>(b) For matched studies, give matching criteria and number of exposed and unexposed                                                                                                      | 6+11-12 |
| Variables                 | 7       | Clearly define all outcomes, exposures, predictors, potential confounders, and effect modifiers. Give diagnostic criteria, if applicable                                                                                                                                                                               | 6-12    |
| Data sources/measurement  | 8*      | For each variable of interest, give sources of data and details of methods of assessment (measurement). Describe comparability of assessment methods if there is more than one group                                                                                                                                   | 6-12    |
| Bias                      | 9       | Describe any efforts to address potential sources of bias                                                                                                                                                                                                                                                              | 6-12    |
| Study size                | 10      | Explain how the study size was arrived at                                                                                                                                                                                                                                                                              | 6-7     |
| Quantitative variables    | 11      | Explain how quantitative variables were handled in the analyses. If applicable, describe which groupings were chosen and why                                                                                                                                                                                           | 16-17   |
| Statistical methods       | 12      | (a) Describe all statistical methods, including those used to control for confounding<br>(b) Describe any methods used to examine subgroups and interactions<br>(c) Explain how missing data were addressed<br>(d) If applicable, explain how loss to follow-up was addressed<br>(e) Describe any sensitivity analyses | n.a.    |
| <b>Results</b>            |         |                                                                                                                                                                                                                                                                                                                        |         |
| Participants              | 13*     | (a) Report numbers of individuals at each stage of study—eg numbers potentially eligible, examined for eligibility, confirmed eligible, included in the study, completing follow-up, and analysed<br>(b) Give reasons for non-participation at each stage<br>(c) Consider use of a flow diagram                        | 16-17   |
| Descriptive data          | 14*     | (a) Give characteristics of study participants (eg demographic, clinical, social) and information on exposures and potential confounders<br>(b) Indicate number of participants with missing data for each variable of interest<br>(c) Summarise follow-up time (eg, average and total amount)                         | 16-17   |
| Outcome data              | 15*     | Report numbers of outcome events or summary measures over time                                                                                                                                                                                                                                                         | 17-18   |



|    |                          |    |                                                                                                                                                                                                              |       |
|----|--------------------------|----|--------------------------------------------------------------------------------------------------------------------------------------------------------------------------------------------------------------|-------|
| 1  | Main results             | 16 | (a) Give unadjusted estimates and, if applicable, confounder-adjusted estimates and their precision (eg, 95% confidence interval). Make clear which confounders were adjusted for and why they were included | 16-18 |
| 2  |                          |    | (b) Report category boundaries when continuous variables were categorized                                                                                                                                    |       |
| 3  |                          |    | (c) If relevant, consider translating estimates of relative risk into absolute risk for a meaningful time period                                                                                             |       |
| 4  |                          |    |                                                                                                                                                                                                              |       |
| 5  |                          |    |                                                                                                                                                                                                              |       |
| 6  |                          |    |                                                                                                                                                                                                              |       |
| 7  |                          |    |                                                                                                                                                                                                              |       |
| 8  |                          |    |                                                                                                                                                                                                              |       |
| 9  | Other analyses           | 17 | Report other analyses done—eg analyses of subgroups and interactions, and sensitivity analyses                                                                                                               | n.a.  |
| 10 |                          |    |                                                                                                                                                                                                              |       |
| 11 | <b>Discussion</b>        |    |                                                                                                                                                                                                              |       |
| 12 |                          |    |                                                                                                                                                                                                              |       |
| 13 | Key results              | 18 | Summarise key results with reference to study objectives                                                                                                                                                     | 18    |
| 14 | Limitations              | 19 | Discuss limitations of the study, taking into account sources of potential bias or imprecision. Discuss both direction and magnitude of any potential bias                                                   | 25-26 |
| 15 |                          |    |                                                                                                                                                                                                              |       |
| 16 | Interpretation           | 20 | Give a cautious overall interpretation of results considering objectives, limitations, multiplicity of analyses, results from similar studies, and other relevant evidence                                   | 25-26 |
| 17 |                          |    |                                                                                                                                                                                                              |       |
| 18 |                          |    |                                                                                                                                                                                                              |       |
| 19 | Generalisability         | 21 | Discuss the generalisability (external validity) of the study results                                                                                                                                        | 25    |
| 20 |                          |    |                                                                                                                                                                                                              |       |
| 21 | <b>Other information</b> |    |                                                                                                                                                                                                              |       |
| 22 | Funding                  | 22 | Give the source of funding and the role of the funders for the present study and, if applicable, for the original study on which the present article is based                                                | 27    |
| 23 |                          |    |                                                                                                                                                                                                              |       |
| 24 |                          |    |                                                                                                                                                                                                              |       |

\*Give information separately for exposed and unexposed groups.

**Note:** An Explanation and Elaboration article discusses each checklist item and gives methodological background and published examples of transparent reporting. The STROBE checklist is best used in conjunction with this article (freely available on the Web sites of PLoS Medicine at <http://www.plosmedicine.org/>, Annals of Internal Medicine at <http://www.annals.org/>, and Epidemiology at <http://www.epidem.com/>). Information on the STROBE Initiative is available at <http://www.strobe-statement.org>.
